# Supplementary material
Source: PubMed Central journal article supplement (PMC3954525)
Supplement: ja500373s_si_004.pdf [file ja500373s_si_004.pdf]

# NHC–Cu-Catalyzed Addition of Propargylboron Reagents to Phosphinoylimines. Enantioselective Synthesis of Trimethylsilyl-Substituted Homoallenylamides and Application to Synthesis of *S*-(-)-Cyclooroidin

Nicholas W. Mszar, Fredrik Haeffner and Amir H. Hoveyda\*

e-mail: amir.hoveyda@bc.edu

*Department of Chemistry, Merkert Chemistry Center, Boston College, Chestnut Hill, Massachusetts 02467*

## SUPPORTING INFORMATION

### Subject Index

|                                                                                        |           |
|----------------------------------------------------------------------------------------|-----------|
| General Information.....                                                               | S1–S2     |
| Reagents.....                                                                          | S2–S3     |
| Procedure for Synthesis of Propargylboron Reagent <b>3a</b> .....                      | S3–S4     |
| Representative Procedure for NHC–Cu-Catalyzed Allenylsilane Additions to Aldimines.... | S4–S5     |
| Procedure for Synthesis of Compounds <b>4b</b> , <b>6</b> and <b>7</b> .....           | S5–S8     |
| Characterization of Allenylsilanes <b>4a</b> , <b>4c–5b</b> and <b>8a–10</b> .....     | S8–S21    |
| Procedure for Synthesis of Compounds <b>11–17</b> and <i>S</i> -(-)-Cyclooroidin.....  | S21–S26   |
| Computational Studies.....                                                             | S27–S77   |
| X-Ray Structure Determinations.....                                                    | S78–S151  |
| NMR Spectra.....                                                                       | S152–S181 |

**General Information:** Infrared (IR) spectra were recorded on a Bruker alpha spectrophotometer,  $\lambda_{\text{max}}$  in  $\text{cm}^{-1}$ . Bands are characterized as broad (br), strong (s), medium (m), and weak (w).  $^1\text{H}$  NMR spectra were recorded on a Varian Unity INOVA 400 (400 MHz) or Varian Unity INOVA 500 (500 MHz) spectrometer. Chemical shifts are reported in ppm from tetramethylsilane with the solvent resonance as the internal standard ( $\text{CDCl}_3$ :  $\delta$  7.26 ppm or  $\text{CD}_3\text{OD}$ :  $\delta$  3.31 ppm). Data are reported as follows: chemical shift, integration, multiplicity (s = singlet, d = doublet, t = triplet, q = quartet, br = broad, m = multiplet, app = apparent) and coupling constants (Hz).  $^{13}\text{C}$  NMR spectra were recorded on a Varian Unity INOVA 400 (100 MHz) or a Varian Unity INOVA 500 (125 MHz) spectrometer with complete proton decoupling. Chemical shifts are reported in ppm from tetramethylsilane with the solvent resonance as the internal standard ( $\text{CDCl}_3$ :  $\delta$  77.16 ppm or  $\text{CD}_3\text{OD}$ :  $\delta$  49.00 ppm). High-resolution mass spectrometry was performed on a JEOL AccuTOF-DART (positive mode) at the Mass Spectrometry Facility, Boston College. Enantiomeric ratios (er) values were determined by GLC analysis (Alltech Associated ChiralDex B-DM (30 m x 0.25 mm)) or HPLC analysis (Chiral Technologies

Chiralcel, Chiral Technologies Chiralcel OD-H (4.6 x 250 mm), Chiral Technologies Chiralcel OJ-H (4.6 x 250 mm), Chiral Technologies Chiralpak OZ-H (4.6 x 250 mm)). Specific rotations were measured on an ATAGO® AP-300 Automatic Polarimeter or a Rudolph Research Analytical Autopol IV Polarimeter. Melting points were measured on a Thomas Hoover capillary melting point apparatus and are uncorrected. MPLC was carried out using a Teledyne Isco Combiflash RF instrument. X-ray structures were obtained with a Microfocus sealed Cu tube from Incote. It is well established that the aforementioned detector allows for determination of absolute configuration of molecules that do not have a heavy atom.

Unless otherwise noted, all reactions were carried out with distilled and degassed solvents under an atmosphere of dry N<sub>2</sub> in oven- (135 °C) or flame-dried glassware with standard dry box or vacuum-line techniques. Tetrahydrofuran (Aldrich) was purified by distillation from sodium benzophenone ketyl immediately prior to use unless otherwise specified. All work-up and purification procedures were carried out with reagent grade solvents (purchased from Fisher) in air. Aryl-, heteroaryl-, and alkene- *N*-diphenylphosphinoyl imines were synthesized through the use of a condensation promoted by TiCl<sub>4</sub> between *P,P*-diphenylphosphinic amide and the corresponding aldehyde.<sup>i</sup> Alkyl-substituted aldimines as well as **11** were synthesized via the corresponding sulfinyl adducts according to formerly disclosed methods.<sup>ii</sup> Unless otherwise noted, characterization data for the aldimine substrates have been reported previously.

### Reagents:

**Acetic acid (glacial):** purchased from Fisher and used as received.

**Acetonitrile:** purchased from Acros and used as received.

**Acetyl chloride:** purchased from Aldrich and used as received.

**Allylamine:** purchased from Aldrich and used as received.

**1,3-Bis(1-adamantyl)imidazolium tetrafluoroborate (1a):** purchased from Aldrich and used as received.

**1,3-Bis(*tert*-butoxycarbonyl)guanidine:** purchased from Aldrich and used as received.

**1,3-Bis(2,4,6-trimethylphenyl)imidazolium chloride (1b):** purchased from Aldrich and used as received.

**Bromine:** purchased from Acros and used as received.

**4-Bromo-1-butene:** purchased from TCI and used as received.

***n*-Butyllithium:** purchased as a 1.6 M solution in hexanes from Strem and titrated prior to use.

***tert*-Butyl methyl ether:** purchased from Aldrich (anhydrous 99.8%) and used as received.

**Copper (I) chloride:** purchased from Strem and used as received.

**Diethyl oxalate:** purchased from Acros and distilled (neat) prior to use.

**Dimethyl sulfide:** purchased from Aldrich and used as received.

***P,P*-Diphenylphosphinic amide:** prepared according to a previously reported procedure.<sup>iii</sup>

**Ethynylmagnesium bromide:** purchased as a 0.5 M solution in thf from Aldrich and used as received.

**Fluorenylmethyloxycarbonyl chloride:** purchased from Advanced ChemTech and used as received.

**Heptane:** purchased from Aldrich and used as received.

**Imidazolinium salt (1c):** prepared according to a previously reported procedure.<sup>iv</sup>

**2-(Iodomethyl)-4,4,5,5-tetramethyl-1,3,2-dioxaborolane:** purchased from Frontier Scientific and used as received.

**2-Isopropoxy-4,4,5,5-tetramethyl-1,3,2-dioxaborolane:** purchased from Aldrich and used as received.

**Magnesium (0):** purchased from Strem and used as received.

**Magnesium (II) chloride:** purchased from Strem and used as received.

**Methanol:** purchased from Fisher and used as received.

**Methylene chloride:** purchased from Fisher and used as received.

**Ozone:** generated by passing O<sub>2</sub> (Airgas) through a Pacific Instrument ozonolysis machine.

**Peracetic acid:** purchased as a 32 wt % solution in dilute acetic acid from Aldrich and used as received.

**Potassium bromide:** purchased from Strem and used as received.

**Potassium carbonate:** purchased from Aldrich and used as received.

**2-Propanol:** purchased from Strem and distilled from Mg prior to use.

**1-(Trimethylsilyl)-1-propyne:** purchased from TCI and used as received.

**Silver acetate:** purchased from Aldrich and used as received.

**Sodium acetate:** purchased from Aldrich and used as received.

**Sodium *tert*-butoxide:** purchased from Strem and used as received.

**Tetrabutylammonium fluoride (TBAF):** purchased as a 1.0 M solution in thf from Fisher and used as received.

**4,4,5,5-Tetramethyl-2-(prop-2-yn-1-yl)-1,3,2-dioxaborolane (3b):** prepared according to a previously reported procedure.<sup>v</sup>

**Titanium (IV) chloride:** purchased from Fluka and used as received.

**Trimethyl(3-(4,4,5,5-tetramethyl-1,3,2-dioxaborolan-2-yl)prop-1-yn-1-yl)silane (3a):** prepared according to a previously reported procedure.<sup>vi</sup>

**Trifluoroacetic acid:** purchased from Fisher and used as received.

**Toluene:** purchased from Fisher and used as received.

**Procedure for Synthesis of Trimethyl(3-(4,4,5,5-tetramethyl-1,3,2-dioxaborolan-2-yl)prop-1-yn-1-yl)silane (3a).** To a flame-dried round bottom flask was added 1-(trimethylsilyl)-1-

propyne (3.75 g, 33.4 mmol) and thf (30 mL) and cooled to  $-25\text{ }^{\circ}\text{C}$  (dry ice/acetone) under  $\text{N}_2$ . *n*-BuLi (1.63 M in hexanes, 19.5 mL, 31.8 mmol) was added drop-wise and the resulting yellow solution was allowed to stir for 1 h at  $-25\text{ }^{\circ}\text{C}$ . To a separate flame-dried flask containing magnesium chloride (2.95 g, 31.0 mmol) thf (30 mL) and 2-isopropoxy-4,4,5,5-tetramethyl-1,3,2-dioxaborolane (6.3 mL, 31.0 mmol) was added. The mixture was allowed to cool to  $-25\text{ }^{\circ}\text{C}$ , after which it was charged, in a drop-wise fashion, with the solution containing the lithiopropyne. The resulting suspension was allowed to stir between  $-25\text{ }^{\circ}\text{C}$  and  $-20\text{ }^{\circ}\text{C}$  for 2 h. At this point, a solution of acetyl chloride (2.45 mL, 34.3 mmol) in methyl *t*-butyl ether (mtbe) (2.45 mL) was added to the suspension at  $-20\text{ }^{\circ}\text{C}$  and the resulting mixture was allowed to stir for 1 h at  $-20\text{ }^{\circ}\text{C}$ , was then allowed to warm to  $22\text{ }^{\circ}\text{C}$  over 1 h and concentrated in vacuo. To the resulting light yellow gummy solid residue was added 60 mL of hexanes, the suspension was filtered, and the yellow solid was washed further with hexanes (2x30 mL); then the volatiles were removed in vacuo, leaving behind a yellow oil that was purified by vacuum distillation to afford **3a** as colorless oil (3.70 g, 15.6 mmol, 50% yield).

**Procedure for NHC–Cu-Catalyzed Enantioselective Allenylsilane Additions to Aryl-, Alkenyl- and Heteroaryl-Substituted *N*-Diphenylphosphinoylimines.** An oven-dried vial was charged with imidazolium salt **1c** (10.5 mg, 16.5  $\mu\text{mol}$ ),  $\text{NaO}t\text{-Bu}$  (2.9 mg, 30.0  $\mu\text{mol}$ ), and  $\text{CuCl}$  (1.9 mg, 15.0  $\mu\text{mol}$ ) in a  $\text{N}_2$ -filled glove box. A separate oven-dried vial was charged with aldimine **2a** (91.6 mg, 0.3 mmol). The vials were sealed with a septum and electrical tape, and removed from the glove box. To the vial containing imidazolium salt was added thf (1.50 mL) and the resulting solution was allowed to stir for 20 min under  $\text{N}_2$  at  $22\text{ }^{\circ}\text{C}$ . In a separate vial, aldimine **2a** was dissolved in thf (1.50 mL) and the resulting solution was allowed to cool to  $-30\text{ }^{\circ}\text{C}$  (dry ice/acetone; temperature monitored by an external thermometer). The NHC–Cu complex solution was then transferred into the vial containing the aldimine at  $-30\text{ }^{\circ}\text{C}$  through a syringe. Propargyl boron reagent **3a** (120  $\mu\text{L}$ , 0.45 mmol) was then added followed by 2-propanol (46.0  $\mu\text{L}$ , 0.6 mmol) and the mixture was allowed to stir for 10 min at  $-30\text{ }^{\circ}\text{C}$ . At this point, the reaction was quenched by filtration of the solution through a short silica gel plug eluted with EtOAc. The volatiles were removed in vacuo and the resulting yellow oil was purified by silica gel chromatography (hexanes $\rightarrow$ 50% EtOAc:hexanes) to afford **4a** as colorless oil (100 mg, 0.240 mmol, 80% yield). For homoallenylamides **4e** and **4h**, to hydrolyze any unreacted aldimine, the unpurified mixture was allowed to stir in 6 mL of 1:1  $\text{Et}_2\text{O}$ :3.0 M HCl for 30 min and then washed with  $\text{Et}_2\text{O}$  (3x2 mL) prior to purification.

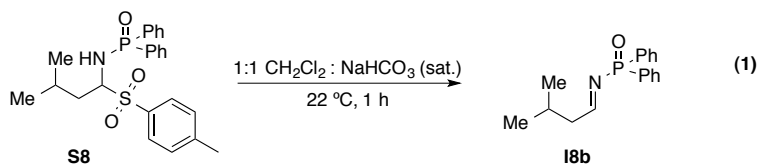

**Procedure for NHC–Cu-Catalyzed Enantioselective Allenylsilane Additions to Alkyl-Substituted *N*-Diphenylphosphinoylimines (eq S1):**

*Preparation of the alkyl-substituted aldimine:* To a vial charged with sulfinyl adduct **S8** (0.30



mmol) was added CH<sub>2</sub>Cl<sub>2</sub> (6.0 mL) and a saturated solution of aqueous NaHCO<sub>3</sub> (6.0 mL), respectively. The biphasic mixture was allowed to stir vigorously for 1 h at 22 °C. The organic layer was separated and the aqueous phase was washed with CH<sub>2</sub>Cl<sub>2</sub> (2 x 3 mL). The combined organic layers were dried over MgSO<sub>4</sub>. The volatiles were removed in vacuo and the unpurified imine was used without further purification in the NHC–Cu-catalyzed allenylsilane addition, according to the procedure detailed below.

An oven-dried vial was charged with imidazolium salt **1c** (9.1 mg, 14.4 μmol), NaOt-Bu (2.9 mg, 30 μmol), and CuCl (1.3 mg, 13 μmol) in a N<sub>2</sub>-filled glove box. A separate oven-dried vial was charged with aldimine **18b** (74.5 mg, 0.261 mmol). Each vial was sealed with a septum and electrical tape and removed from the glove box. Tetrahydrofuran (1.50 mL) was added to the solution containing imidazolium salt and the resulting mixture was allowed to stir for 20 min under N<sub>2</sub> at 22 °C. To the vial containing aldimine was added thf (1.50 mL) and, once dissolved, cooled to –30 °C (dry ice/acetone bath; monitored by an external thermometer). The solution of NHC–Cu complex was then transferred into the vessel containing the aldimine at –30 °C by a syringe. Next, propargyl boron reagent **3a** (104 μL, 0.392 mmol) was added, followed by 2-propanol (40.0 μL, 0.522 mmol) and the solution was allowed to stir for 10 min at –30 °C. The reaction was quenched by filtering the solution through a short silica gel plug with EtOAc as eluent. The volatiles were removed in vacuo and the resulting yellow oil was purified by silica gel chromatography (hexanes→50% EtOAc:hexanes) to afford **8b** as colorless oil (98.0 mg, 0.246 mmol, 94% yield). For products **8c** and **10**, in order to hydrolyze unreacted aldimine, the unpurified mixture was allowed to stir in 6 mL of 1:1 Et<sub>2</sub>O:3.0 M HCl for 30 min and washed with Et<sub>2</sub>O (3 x 2 mL) prior to purification.

**Procedure for Synthesis of (S)-P,P-Diphenyl-N-(1-phenylbuta-2,3-dien-1-yl)phosphinic amide (4b).** To a vial containing allene **4a** (38.0 mg, 0.091 mmol) was added thf (0.7 mL). The solution was allowed to cool to –78 °C (dry ice/acetone bath) and a solution of (*n*-Bu)<sub>4</sub>NF in thf (1.0 M, 0.182 mmol) was added in one portion while stirring. The resulting yellow solution was allowed to warm to 22 °C and then allowed to stir for 5 min at 22 °C. The volatiles were removed in vacuo and the resulting orange oil was purified by silica gel chromatography (hexanes→75% EtOAc:hexanes) to afford **4b** as white solid (28.8 mg, 0.083 mmol, 92% yield). Melting point: 110–111 °C. IR (neat): 3183 (w, br), 3058 (w), 1950 (m), 1436 (m), 1178 (s), 1123 (m), 1107 (m), 1087 (m), 905 (w), 749 (w), 721 (m), 693 (s), 534 (s) cm<sup>-1</sup>; <sup>1</sup>H NMR (400 MHz, CDCl<sub>3</sub>): δ 7.90–7.84 (2H, m), 7.81–7.75 (2H, m), 7.48–7.37 (4H, m), 7.34–7.28 (2H, m), 7.25–7.16 (4H, m), 5.46–5.41 (1H, m), 4.91–4.77 (3H, m), 3.38 (1H, dd, *J* = 9.2, 6.4 Hz); <sup>13</sup>C NMR (100 MHz, CDCl<sub>3</sub>): δ 207.4, 142.6 (d, *J* = 4.9 Hz), 132.8 (d, *J* = 128.1 Hz), 132.5 (d, *J* = 9.6 Hz), 132.5 (d, *J* = 129.4 Hz), 132.3 (d, *J* = 9.6 Hz), 132.0 (d, *J* = 2.9 Hz), 131.9 (d, *J* = 2.5 Hz), 128.7, 128.6 (d, *J* = 11.7 Hz, only the peak at 128.5 is visible, the other is overlapping), 128.5 (d, *J* = 12.6 Hz), 127.6, 127.0, 95.5 (d, *J* = 5.2 Hz), 79.1, 53.5; HRMS Calcd for C<sub>22</sub>H<sub>22</sub>NOP [M + H]<sup>+</sup>: 346.1361; Found: 346.1361. [α]<sub>D</sub><sup>20</sup> = –40.7 (*c* = 1.35, CHCl<sub>3</sub>) for a 95:5 er sample. The enantiomeric purity of this compound was determined by HPLC analysis in comparison with authentic racemic material (Chiracel OD–H, 99:1 hexanes:*i*-PrOH, 0.8 mL/min, 220 nm): *t*<sub>R</sub> of **4b**: 85 min (minor)

and 116 min (major). A crystal suitable for X-ray diffraction was obtained by vapor diffusion of hexanes into a saturated solution of **4b** in CH<sub>2</sub>Cl<sub>2</sub> at 22 °C.

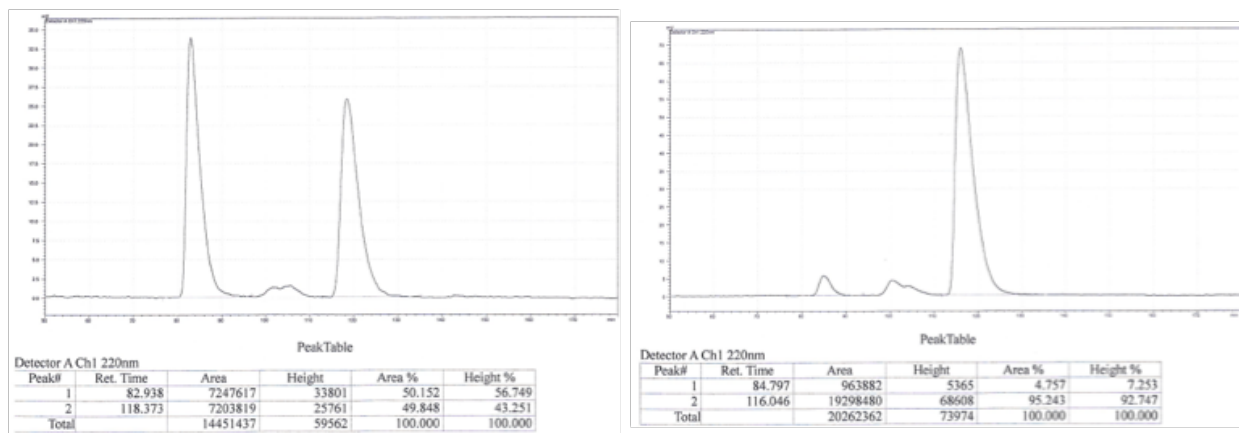

| Retention Time | Area    | Area % | Retention Time | Area     | Area % |
|----------------|---------|--------|----------------|----------|--------|
| 82.938         | 7247617 | 50.152 | 84.797         | 963882   | 4.757  |
| 118.373        | 7203819 | 49.848 | 116.046        | 19298480 | 95.243 |

**Procedure for Synthesis of (R)-1-Phenyl-2-(trimethylsilyl)buta-2,3-dien-1-amine (6).** Homoallenylamide **4a** (103.0 mg, 0.247 mmol) was first dissolved in MeOH (3.0 mL) in a vial. An aqueous solution of 3.0 M HCl was then introduced (1.0 mL) and the resulting mixture was allowed to stir at 22 °C for 12 h, after which it was washed with toluene (3x1.0 mL) and the organic layer was separated. The collected organic phase was washed with 3.0 M HCl. Then the combined aqueous fractions were basified with solid NaOH until the pH reached >12. The aqueous layer was then washed with EtOAc (3x1.0 mL) and the combined organic layers were dried over MgSO<sub>4</sub> and concentrated in vacuo to afford **6** as light yellow oil (49.8 mg, 0.229 mmol, 93% yield). IR (neat): 2955 (w), 1923 (m), 1601 (w), 1492 (w), 1247 (m), 834 (s), 754 (s), 697 (s), 625 (m), 473 (m) cm<sup>-1</sup>; <sup>1</sup>H NMR (400 MHz, CDCl<sub>3</sub>): δ 7.31–7.29 (4H, m), 7.27–7.21 (1H, m), 4.69 (1H, dd, *J* = 10.8, 3.2 Hz), 4.64 (1H, dd, *J* = 10.8, 2.8 Hz), 4.44 (1H, t, *J* = 3.2 Hz), –0.07 (9H, s); <sup>13</sup>C NMR (100 MHz, CDCl<sub>3</sub>): δ 207.6, 145.1, 128.6, 127.5, 127.4, 101.7, 72.9, 55.4, –1.1; HRMS Calcd for C<sub>13</sub>H<sub>20</sub>NSi [M + H]<sup>+</sup>: 218.1365; Found: 218.1372. [α]<sub>D</sub><sup>20</sup> = –43.4 (*c* = 0.45, CHCl<sub>3</sub>) for a 95:5 er sample. The enantiomeric purity of this compound was determined by GLC analysis in comparison with authentic racemic material (CDB-DM column, 70 °C, 20 psi): *t*<sub>R</sub> of **6**: 406 min (major) and 440 min (minor).

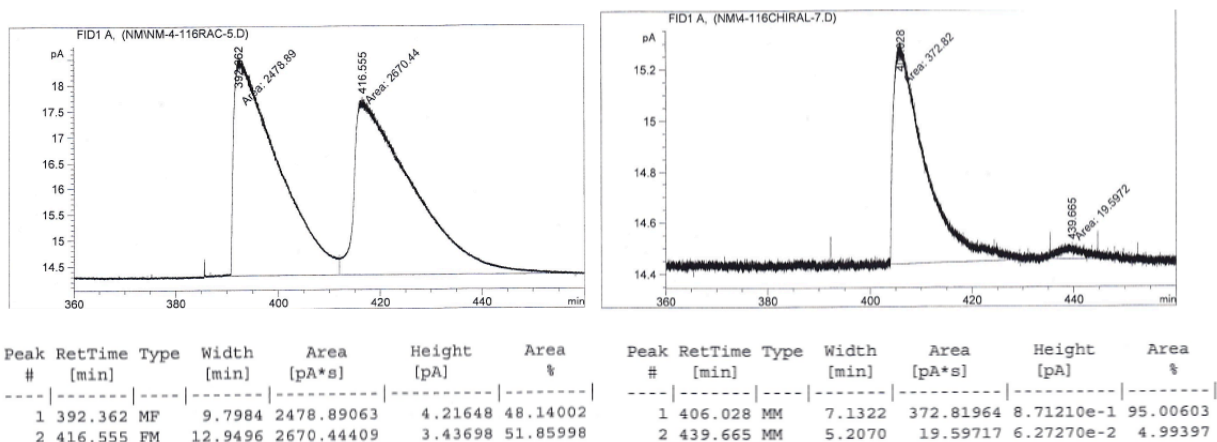

| Retention Time | Area       | Area %   | Retention Time | Area      | Area %   |
|----------------|------------|----------|----------------|-----------|----------|
| 392.362        | 2478.89063 | 48.14002 | 406.028        | 372.81964 | 95.00603 |
| 416.555        | 2670.44409 | 51.85998 | 439.665        | 19.59717  | 4.99397  |

**Procedure for synthesis of (*R*)-*N*-(4-Bromo-1-phenylbut-2-yn-1-yl)-*P,P*-diphenylphosphinic amide (**7**).** Acetic acid (1.0 mL) was added to a vial containing allene **3a** (53.0 mg, 0.127 mmol), potassium bromide (16.6 mg, 0.140 mmol) and sodium acetate (125.0 mg, 1.52 mmol). A peracetic acid solution was then introduced in a drop-wise fashion (640  $\mu$ L, 3.04 mmol) and the resulting pale yellow solution was allowed to stir at 22  $^{\circ}$ C for 10 min. A saturated solution of sodium thiosulfate was then added until the solution became colorless. The aqueous layer was diluted with water (1.0 mL) and washed with EtOAc (3x1.0 mL). The combined organic layers were dried over  $MgSO_4$ , concentrated in vacuo and dried through azeotrope with heptane. The resulting yellow oil was purified by silica gel chromatography (hexanes  $\rightarrow$  75% EtOAc:hexanes) affording **7** as white solid (36.2 mg, 0.085 mmol, 67 % yield). Melting point = 157–160  $^{\circ}$ C (d). IR (neat): 3148 (m, br), 2862 (w), 1438 (m), 1188 (s), 1146 (m), 1124 (m), 1110 (m), 1062 (w), 724 (m), 696 (s), 545 (s)  $cm^{-1}$ ;  $^1H$  NMR (400 MHz,  $CDCl_3$ ):  $\delta$  8.06–8.01 (2H, m), 7.87–7.82 (2H, m), 7.59–7.47 (6H, m), 7.44–7.39 (2H, m), 7.38–7.33 (2H, m), 7.32–7.27 (1H, m), 5.22 (1H, tt,  $J$  = 10.0, 2.0 Hz), 3.94 (2H, dd,  $J$  = 2.0, 1.2 Hz), 3.44 (1H, dd,  $J$  = 9.6, 8.4 Hz);  $^{13}C$  NMR (100 MHz,  $CDCl_3$ ):  $\delta$  139.8 (d,  $J$  = 4.6 Hz), 132.8 (d,  $J$  = 9.7 Hz), 132.3 (d,  $J$  = 127.5 Hz), 132.3 (d,  $J$  = 2.9 Hz), 132.3 (d,  $J$  = 3.0 Hz), 132.0 (d,  $J$  = 9.7 Hz), 131.8 (d,  $J$  = 129.4 Hz), 128.9, 128.8 (d,  $J$  = 12.7 Hz), 128.7 (d,  $J$  = 12.6 Hz), 128.3, 127.3, 86.6 (d,  $J$  = 5.9 Hz), 80.8, 46.8, 14.6; HRMS Calcd for  $C_{22}H_{20}BrNOP$  [ $M + H$ ] $^{+}$ : 424.0466; Found: 424.0470.  $[\alpha]_D^{20} = -28.5$  ( $c$  = 0.70,  $CHCl_3$ ) for a 95:5 er sample. The enantiomeric purity of this compound was determined by HPLC analysis in comparison with authentic racemic material (Chiracel OD–H, 97:3 hexanes:*i*-PrOH, 0.7 mL/min, 220 nm):  $t_R$  of **7**: 48 min (minor) and 69 min (major). A crystal suitable for X-ray diffraction was obtained by vapor diffusion of hexanes into a saturated solution of **7** in  $CH_2Cl_2$  at 22  $^{\circ}$ C.

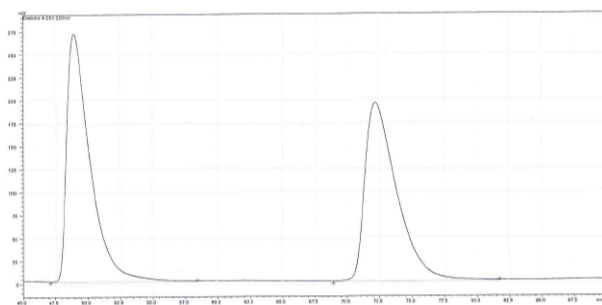

| Detector A Ch1 220nm |           |          |        |         |          |
|----------------------|-----------|----------|--------|---------|----------|
| Peak#                | Ret. Time | Area     | Height | Area %  | Height % |
| 1                    | 48.928    | 33896894 | 270550 | 50.416  | 58.208   |
| 2                    | 72.173    | 33336876 | 194251 | 49.584  | 41.792   |
| Total                |           | 67233770 | 464801 | 100.000 | 100.000  |

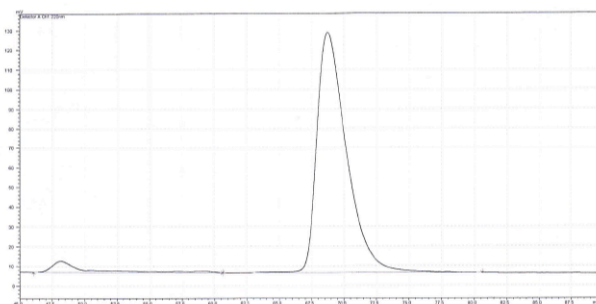

| Detector A Ch1 220nm |           |          |        |         |          |
|----------------------|-----------|----------|--------|---------|----------|
| Peak#                | Ret. Time | Area     | Height | Area %  | Height % |
| 1                    | 48.191    | 937220   | 5610   | 4.600   | 4.383    |
| 2                    | 68.723    | 19439311 | 122389 | 95.400  | 95.617   |
| Total                |           | 20376531 | 127998 | 100.000 | 100.000  |

| Retention Time | Area     | Area % | Retention Time | Area     | Area % |
|----------------|----------|--------|----------------|----------|--------|
| 48.928         | 33896894 | 50.416 | 48.191         | 937220   | 4.600  |
| 72.173         | 33336876 | 49.584 | 68.723         | 19439311 | 95.400 |

**(R)-P,P-Diphenyl-N-(1-phenyl-2-(trimethylsilyl)buta-2,3-dien-1-yl)phosphinic amide (4a):** IR (neat): 3181 (w, br), 2956 (w), 1929 (m), 1453 (m), 1196 (m), 1123 (m), 839 (s), 697 (s), 536 (m)  $\text{cm}^{-1}$ ;  $^1\text{H}$  NMR (400 MHz,  $\text{CDCl}_3$ ):  $\delta$  7.89–7.84 (2H, m), 7.78–7.72 (2H, m), 7.52–7.47 (1H, m), 7.45–7.39 (3H, m), 7.33–7.29 (2H, m), 7.24–7.15 (5H, m), 4.86 (1H, dd,  $J = 12.0, 4.0$  Hz), 4.76–4.69 (2H, m), 3.74 (1H, app t,  $J = 8.4$  Hz),  $-0.18$  (9H, s);  $^{13}\text{C}$  NMR (100 MHz,  $\text{CDCl}_3$ ):  $\delta$  207.6, 143.1 (d,  $J = 3.5$  Hz), 133.1 (d,  $J = 128.1$  Hz), 132.7 (d,  $J = 129.0$  Hz), 132.4 (d,  $J = 9.7$  Hz), 132.2 (d,  $J = 9.4$  Hz), 131.8 (d,  $J = 2.8$  Hz), 131.7 (d,  $J = 2.8$  Hz), 128.5 (d,  $J = 12.3$  Hz), 128.4, 128.3 (d,  $J = 12.4$  Hz), 127.9, 127.5, 101.0 (d,  $J = 5.2$  Hz), 74.0, 53.8,  $-1.4$ ; HRMS Calcd for  $\text{C}_{25}\text{H}_{29}\text{NOPSi}$   $[\text{M} + \text{H}]^+$ : 418.1756; Found: 418.1760.  $[\alpha]_D^{20} = -70.1$  ( $c = 1.14$ ,  $\text{CHCl}_3$ ) for a 95:5 er sample. The enantiomeric purity of this compound was determined by HPLC analysis in comparison with authentic racemic material (Chiracel OZ-H, 97:3 hexanes:*i*-PrOH, 0.6 mL/min, 220 nm):  $t_R$  of **4a**: 78 min (minor) and 84 min (major).

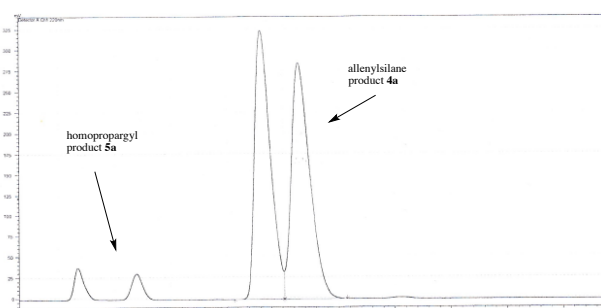

| Detector A Ch1 220nm |           |           |        |         |          |
|----------------------|-----------|-----------|--------|---------|----------|
| Peak#                | Ret. Time | Area      | Height | Area %  | Height % |
| 1                    | 75.982    | 63619046  | 324819 | 49.475  | 53.244   |
| 2                    | 82.731    | 64967990  | 285240 | 50.525  | 46.756   |
| Total                |           | 128587036 | 610059 | 100.000 | 100.000  |

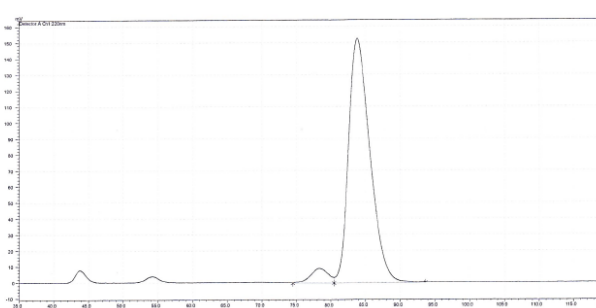

| Detector A Ch1 220nm |           |          |        |         |          |
|----------------------|-----------|----------|--------|---------|----------|
| Peak#                | Ret. Time | Area     | Height | Area %  | Height % |
| 1                    | 78.323    | 1665801  | 9144   | 4.836   | 5.651    |
| 2                    | 83.843    | 32781014 | 152661 | 95.164  | 94.349   |
| Total                |           | 34446815 | 161805 | 100.000 | 100.000  |

| Retention Time | Area     | Area % | Retention Time | Area     | Area % |
|----------------|----------|--------|----------------|----------|--------|
| 75.982         | 63619046 | 49.475 | 78.323         | 1665801  | 4.836  |
| 82.731         | 64967990 | 50.525 | 83.843         | 32781014 | 95.164 |

**(R)-N-(1-(2-Fluorophenyl)-2-(trimethylsilyl)buta-2,3-dien-1-yl)-P,P-diphenylphosphinic**

**amide (4c):** IR (neat): 3992 (w, br), 3059 (w), 2958 (w), 1929 (m), 1589 (w), 1489 (w), 1455 (w), 1438 (m), 1249 (m), 1196 (m), 1123 (m), 1108 (m), 841 (s), 753 (s), 724 (m), 696 (m), 550 (m), 529 (m)  $\text{cm}^{-1}$ ;  $^1\text{H}$  NMR (400 MHz,  $\text{CDCl}_3$ ):  $\delta$  7.86–7.81 (2H, m), 7.77–7.71 (2H, m), 7.50–7.46 (1H, m), 7.44–7.38 (3H, m), 7.32–7.27 (2H, m), 7.19–7.10 (2H, m), 7.01–6.97 (1H, m), 6.89 (1H, ddd,  $J = 10.8, 8.4, 1.2$  Hz), 4.93 (1H, app tt,  $J = 9.6, 2.8$  Hz), 4.84 (1H, dd,  $J = 11.2, 3.6$  Hz), 4.71 (1H, dd,  $J = 10.8, 2.8$  Hz), 3.93 (1H, br dd,  $J = 9.6, 8.4$  Hz),  $-0.15$  (9H, s);  $^{13}\text{C}$  NMR (100 MHz,  $\text{CDCl}_3$ ):  $\delta$  207.7, 160.5 (d,  $J_{\text{C-F}} = 246.3$  Hz), 133.0 (d,  $J = 128.1$  Hz), 132.3 (d,  $J = 129.5$  Hz, only the peak at 133.0 is visible, the other is overlapping), 132.5 (d,  $J = 9.7$  Hz), 132.1 (d,  $J = 9.8$  Hz), 131.9 (d,  $J = 2.9$  Hz), 131.7 (d,  $J = 2.7$  Hz), 130.4 (dd,  $J = 12.4, 3.1$  Hz), 129.3 (d,  $J = 4.5$  Hz), 129.2 (d,  $J = 8.3$  Hz), 128.5 (d,  $J = 12.7$  Hz), 128.3 (d,  $J = 12.3$  Hz), 124.1 (d,  $J = 3.7$  Hz), 115.8 (d,  $J = 21.9$  Hz), 100.3 (dd,  $J = 5.3, 1.1$  Hz), 74.4, 48.7 (d,  $J = 2.1$  Hz),  $-1.5$ ; HRMS Calcd for  $\text{C}_{25}\text{H}_{28}\text{FNOPSi}$   $[\text{M} + \text{H}]^+$ : 436.1662; Found: 436.1671.  $[\alpha]_{\text{D}}^{20} = -53.8$  ( $c = 1.30$ ,  $\text{CHCl}_3$ ) for a 92:8 er sample. The enantiomeric purity of this compound was determined by HPLC analysis in comparison with authentic racemic material (Chiracel OD-H, 99:1 hexanes:*i*-PrOH, 0.5 mL/min, 220 nm):  $t_{\text{R}}$  of **4c**: 49 min (major) and 67 min (minor).

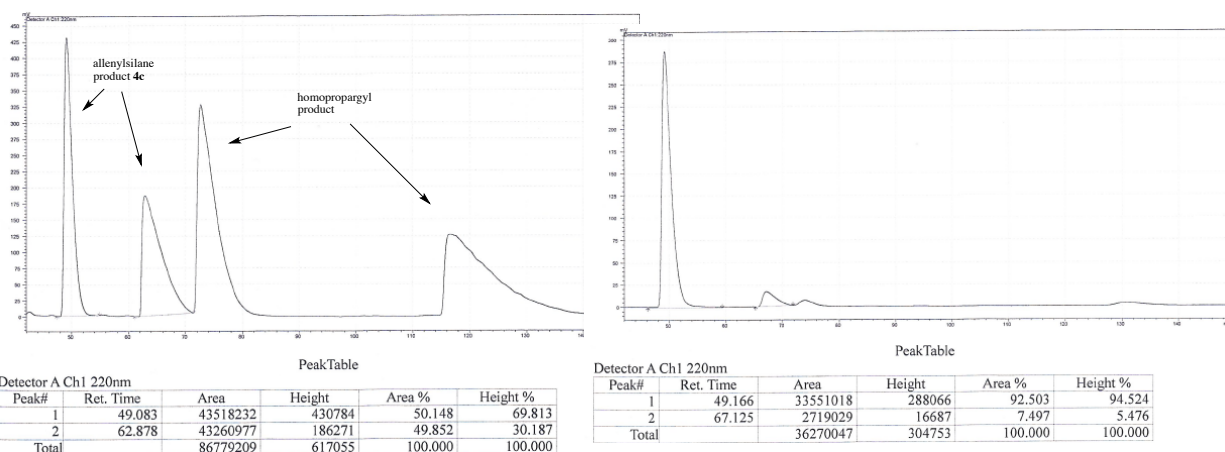

| Retention Time | Area     | Area % | Retention Time | Area     | Area % |
|----------------|----------|--------|----------------|----------|--------|
| 49.083         | 43518232 | 50.148 | 49.166         | 33551018 | 92.503 |
| 62.878         | 43260977 | 49.852 | 67.125         | 2719029  | 7.497  |

**(R)-N-(1-(2-Chlorophenyl)-2-(trimethylsilyl)buta-2,3-dien-1-yl)-P,P-diphenylphosphinic amide (4d):** IR (neat): 3183 (w, br), 2958 (w), 1928 (m), 1438 (m), 1248 (m), 1191 (m), 1123 (m), 1109 (m), 838 (s), 747 (s), 723 (m), 694 (s), 541 (m), 521 (m)  $\text{cm}^{-1}$ ;  $^1\text{H}$  NMR (400 MHz,  $\text{CDCl}_3$ ):  $\delta$  7.88–7.83 (2H, m), 7.77–7.72 (2H, m), 7.52–7.46 (1H, m), 7.45–7.38 (3H, m), 7.32–7.27 (2H, m), 7.24–7.19 (2H, m), 7.13 (2H, dq,  $J = 7.2, 2.0$  Hz), 5.14 (1H, app tt,  $J = 10.0, 3.4$  Hz), 4.82 (1H, dd,  $J = 11.2, 3.6$  Hz), 4.70 (1H, dd,  $J = 11.2, 3.2$  Hz), 3.95 (1H, dd,  $J = 9.2, 8.0$  Hz),  $-0.14$  (9H, s);  $^{13}\text{C}$  NMR (100 MHz,  $\text{CDCl}_3$ ):  $\delta$  208.2, 140.3 (d,  $J = 3.2$  Hz), 133.2, 133.0 (d,  $J = 127.9$  Hz), 132.6 (d,  $J = 9.6$  Hz), 132.3 (d,  $J = 127.6$  Hz, only the peak at 132.9 is visible, the other is overlapping), 132.1 (d,  $J = 9.8$  Hz), 131.9 (d,  $J = 2.5$  Hz), 131.7 (d,  $J = 2.7$  Hz), 130.0, 130.0, 128.7, 128.5 (d,  $J = 12.5$  Hz), 128.2 (d,  $J = 12.7$  Hz), 126.9, 100.5 (d,  $J = 5.4$  Hz), 74.3, 51.4,  $-1.33$ ; HRMS Calcd for  $\text{C}_{25}\text{H}_{28}\text{ClNOPSi}$   $[\text{M} + \text{H}]^+$ : 452.1366; Found: 452.1350.

$[\alpha]_D^{20} = -26.5$  ( $c = 2.07$ ,  $\text{CHCl}_3$ ) for a 92:8 er sample. The enantiomeric purity of this compound was determined by HPLC analysis in comparison with authentic racemic material (Chiracel OZ–H, 97:3 hexanes:*i*-PrOH, 0.8 mL/min, 220 nm):  $t_R$  of **4d**: 69 min (minor) and 88 min (major).

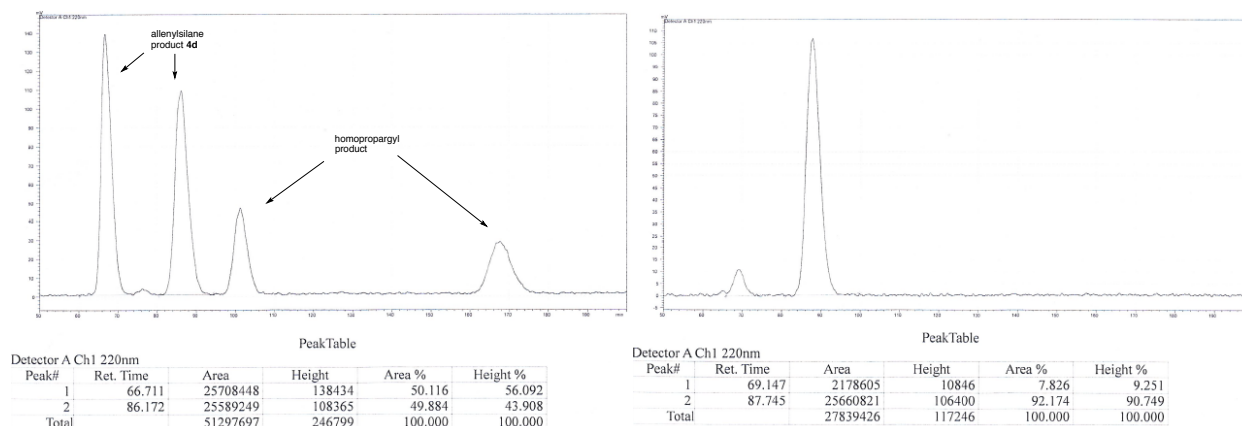

| Retention Time | Area     | Area % | Retention Time | Area     | Area % |
|----------------|----------|--------|----------------|----------|--------|
| 66.711         | 25708448 | 50.116 | 69.147         | 2178605  | 7.826  |
| 86.172         | 25589249 | 49.884 | 87.745         | 25660821 | 92.174 |

**(R)- P,P-Diphenyl-N-(1-(*o*-tolyl)-2-(trimethylsilyl)buta-2,3-dien-1-yl)phosphinic amide (4e):**  
 IR (neat): 3211 (w, br), 3192 (w, br), 3053 (w), 2955 (w), 1928 (m), 1438 (m), 1248 (m), 1201 (m), 1122 (m), 1109 (m), 1073 (m), 840 (s), 752 (m), 723 (m), 697 (m), 550 (m)  $\text{cm}^{-1}$ ;  $^1\text{H}$  NMR (400 MHz,  $\text{CDCl}_3$ ):  $\delta$  7.91–7.85 (2H, m), 7.80–7.74 (2H, m), 7.51–7.50 (1H, m), 7.45–7.38 (3H, m), 7.32–7.27 (2H, m), 7.21–7.18 (1H, m), 7.11–7.05 (2H, m), 7.01–6.98 (1H, m), 4.96 (1H, ddt,  $J = 10.4, 9.6, 3.2$  Hz), 4.82 (1H, dd,  $J = 10.8, 3.2$  Hz), 4.74 (1H, dd,  $J = 11.2, 3.2$  Hz), 3.65 (1H, app t,  $J = 8.0$  Hz), 2.22 (3H, s),  $-0.20$  (9H, s);  $^{13}\text{C}$  NMR (100 MHz,  $\text{CDCl}_3$ ):  $\delta$  208.0, 140.8 (d,  $J = 2.9$  Hz), 135.6, 133.1 (d,  $J = 127.1$  Hz), 132.7 (d,  $J = 129.6$  Hz), 132.5 (d,  $J = 9.4$  Hz), 132.2 (d,  $J = 9.4$  Hz), 131.8 (d,  $J = 2.7$  Hz), 131.7 (d,  $J = 2.9$  Hz), 130.9, 128.5 (d,  $J = 12.3$  Hz), 128.2 (d,  $J = 12.5$  Hz), 128.0, 127.5, 126.0, 101.4 (d,  $J = 5.2$  Hz), 73.9, 50.5, 19.3,  $-1.4$ ; HRMS Calcd for  $\text{C}_{26}\text{H}_{31}\text{NOPSi}$   $[\text{M} + \text{H}]^+$ : 432.1913; Found: 432.1894.  $[\alpha]_D^{20} = -43.2$  ( $c = 1.62$ ,  $\text{CHCl}_3$ ) for a 95:5 er sample. The enantiomeric purity of this compound was determined by HPLC analysis in comparison with authentic racemic material (Chiracel OD–H, 99:1 hexanes:*i*-PrOH, 0.5 mL/min, 220 nm):  $t_R$  of **4e**: 33 min (major) and 39 min (minor).



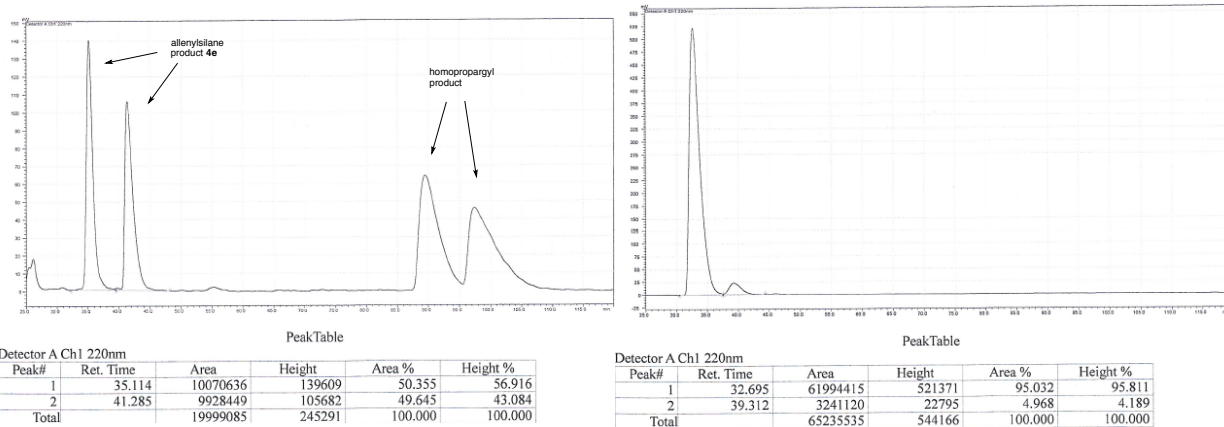

| Retention Time | Area     | Area % | Retention Time | Area     | Area % |
|----------------|----------|--------|----------------|----------|--------|
| 35.114         | 10070636 | 50.355 | 32.695         | 61994415 | 95.032 |
| 41.285         | 9928449  | 49.645 | 39.312         | 3241120  | 4.968  |

**(R)-N-(1-(3-Bromophenyl)-2-(trimethylsilyl)buta-2,3-dien-1-yl)-P,P-diphenylphosphinic amide (4f):** Melting point: 95–97 °C. IR (neat): 3192 (w, br), 2955 (w), 1929 (m), 1592 (w), 1571 (w), 1437 (m), 1248 (m), 1192 (m), 1123 (m), 1072 (m), 837 (s), 724 (s), 695 (s), 545 (m), 522 (s)  $\text{cm}^{-1}$ ;  $^1\text{H}$  NMR (400 MHz,  $\text{CDCl}_3$ ):  $\delta$  7.87–7.82 (2H, m), 7.74–7.70 (2H, m), 7.52–7.48 (1H, m), 7.45–7.40 (3H, m), 7.34–7.27 (4H, m), 7.14–7.12 (1H, m), 7.08–7.04 (1H, m), 4.87 (1H, dd,  $J = 10.8, 3.2$  Hz), 4.77 (1H, dd,  $J = 11.2, 2.8$  Hz) 4.70 (1H, tt,  $J = 9.6, 2.8$  Hz), 3.75 (1H, t,  $J = 8.4$  Hz),  $-0.15$  (9H, s);  $^{13}\text{C}$  NMR (100 MHz,  $\text{CDCl}_3$ ):  $\delta$  207.5, 145.4 (d,  $J = 3.0$  Hz), 132.9 (d,  $J = 127.5$  Hz), 132.3 (d,  $J = 128.9$  Hz), 132.4 (d,  $J = 9.4$  Hz), 132.1 (d,  $J = 9.7$  Hz), 132.0 (d,  $J = 2.5$  Hz), 131.9 (d,  $J = 2.5$  Hz), 130.9, 130.6, 130.1, 128.6 (d,  $J = 12.4$  Hz), 128.3 (d,  $J = 12.8$  Hz), 126.8, 122.4, 100.6 (d,  $J = 5.2$  Hz), 74.5, 53.3,  $-1.3$ ; HRMS Calcd for  $\text{C}_{25}\text{H}_{28}\text{BrNOPSi}$   $[\text{M} + \text{H}]^+$ : 496.0861; Found: 496.0878.  $[\alpha]_D^{20} = -71.4$  ( $c = 1.26$ ,  $\text{CHCl}_3$ ) for a 94:6 er sample. The enantiomeric purity is determined by HPLC analysis in comparison with authentic racemic material (Chiracel AZ–H, 97:3 hexanes:*i*-PrOH, 0.5 mL/min, 220 nm):  $t_R$  of **4f**: 140 min (major) and 149 min (minor). A crystal suitable for X-ray diffraction was obtained by slow evaporation of a saturated solution of **4f** in hexanes at 4 °C; see below for a complete set of data.

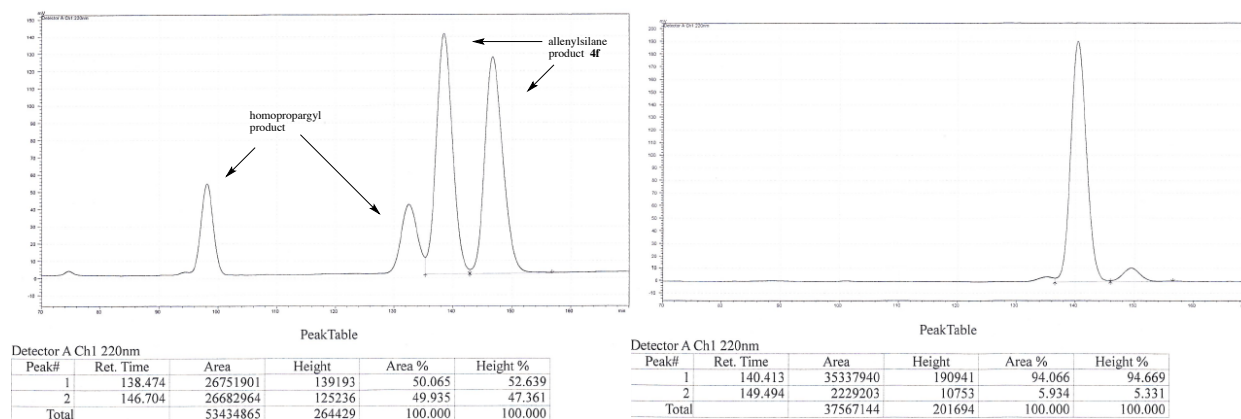

| Retention Time | Area     | Area % | Retention Time | Area     | Area % |
|----------------|----------|--------|----------------|----------|--------|
| 138.474        | 26565513 | 50.198 | 140.413        | 35337940 | 94.066 |
| 146.704        | 26356216 | 49.802 | 149.494        | 2229203  | 5.934  |

**(R)-N-(1-(4-Chlorophenyl)-2-(trimethylsilyl)buta-2,3-dien-1-yl)-P,P-diphenylphosphinic amide (4g):** IR (neat): 3182 (w, br), 3057 (w), 2955 (w), 1928 (m), 1592 (w), 1489 (w), 1438 (m), 1407 (w), 1248 (m), 1191 (m), 1123 (m), 1108 (m), 1086 (m), 904 (w), 839 (s), 750 (m), 723 (m), 695 (s), 538 (s), 521 (m)  $\text{cm}^{-1}$ ;  $^1\text{H}$  NMR (400 MHz,  $\text{CDCl}_3$ ):  $\delta$  7.89–7.83 (2H, m), 7.75–7.69 (2H, m), 7.52–7.48 (1H, m), 7.46–7.41 (3H, m), 7.34–7.30 (2H, m), 7.18–7.12 (4H, m), 4.87 (1H, dd,  $J = 11.2, 3.2$  Hz), 4.77–4.69 (2H, m), 3.73 (1H, br t,  $J = 8.4$  Hz),  $-0.16$  (9H, s);  $^{13}\text{C}$  NMR (100 MHz,  $\text{CDCl}_3$ ):  $\delta$  207.6, 141.7 (d,  $J = 2.8$  Hz), 133.3, 132.9 (d,  $J = 127.7$  Hz), 132.6 (d,  $J = 128.6$  Hz), 132.3 (d,  $J = 9.7$  Hz), 132.2 (d,  $J = 9.7$  Hz), 132.0 (d,  $J = 2.8$  Hz), 131.8 (d,  $J = 2.7$  Hz), 129.4, 128.6, 128.6 (d,  $J = 12.3$  Hz), 128.4 (d,  $J = 12.6$  Hz), 100.7 (d,  $J = 5.3$  Hz), 74.3, 53.2,  $-1.3$ ; HRMS Calcd for  $\text{C}_{25}\text{H}_{28}\text{ClNOPSi}$   $[\text{M} + \text{H}]^+$ : 452.1366; Found: 452.1369.  $[\alpha]_{\text{D}}^{20} = -78.2$  ( $c = 1.15$ ,  $\text{CHCl}_3$ ) for a 91:9 er sample. The enantiomeric purity of this compound was determined by HPLC analysis in comparison with authentic racemic material (Chiracel OD-H, 99:1 hexanes:*i*-PrOH, 0.5 mL/min, 220 nm):  $t_{\text{R}}$  of **4g**: 34 min (major) and 56 min (minor).

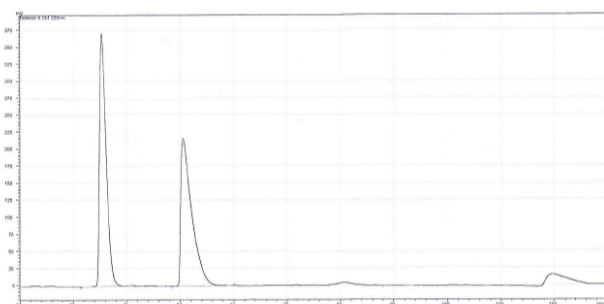

| PeakTable |           |          |        |         |          |
|-----------|-----------|----------|--------|---------|----------|
| Peak#     | Ret. Time | Area     | Height | Area %  | Height % |
| 1         | 35.305    | 31390399 | 370847 | 50.402  | 63.183   |
| 2         | 50.483    | 30889225 | 216090 | 49.598  | 36.817   |
| Total     |           | 62279624 | 586937 | 100.000 | 100.000  |

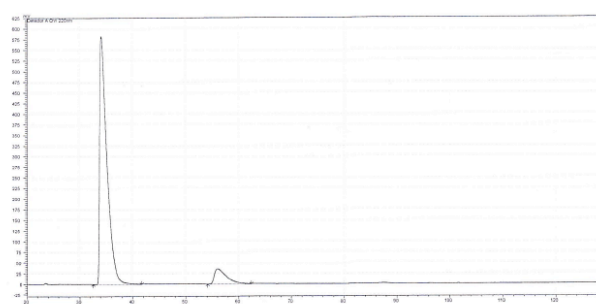

| PeakTable |           |          |        |         |          |
|-----------|-----------|----------|--------|---------|----------|
| Peak#     | Ret. Time | Area     | Height | Area %  | Height % |
| 1         | 34.081    | 56322561 | 582962 | 90.619  | 94.220   |
| 2         | 55.993    | 5830845  | 35765  | 9.381   | 5.780    |
| Total     |           | 62153406 | 618727 | 100.000 | 100.000  |

| Retention Time | Area     | Area % | Retention Time | Area     | Area % |
|----------------|----------|--------|----------------|----------|--------|
| 35.305         | 31390399 | 50.402 | 34.081         | 56322561 | 90.619 |
| 50.483         | 30889225 | 49.598 | 55.993         | 5830845  | 9.381  |

**(R)-N-(1-(4-Methoxyphenyl)-2-(trimethylsilyl)buta-2,3-dien-1-yl)-P,P-diphenylphosphinic amide (4h):** IR (neat): 3363 (w, br), 3202 (w, br), 3056 (w), 2955 (w), 2897 (w), 2836 (w), 1929 (m), 1610 (w), 1511 (m), 1439 (m), 1250 (s), 1198 (m), 1123 (m), 1110 (m), 1074 (m), 1035 (w), 841 (s), 752 (m), 724 (m), 697 (m), 540 (m)  $\text{cm}^{-1}$ ;  $^1\text{H}$  NMR (400 MHz,  $\text{CDCl}_3$ ):  $\delta$  7.89–7.84 (2H, m), 7.79–7.73 (2H, m); 7.51–7.46 (1H, m); 7.44–7.39 (3H, m), 7.34–7.29 (2H, m), 7.14–7.10 (2H, m), 6.76–6.72 (2H, m), 4.85 (1H, dd,  $J = 10.8, 3.2$  Hz), 4.75–4.66 (2H, m), 3.76 (3H, s), 3.70 (1H, br t,  $J = 8.4$  Hz),  $-0.18$  (9H, s);  $^{13}\text{C}$  NMR (100 MHz,  $\text{CDCl}_3$ ):  $\delta$  207.5, 159.0, 135.3 (d,  $J = 3.5$  Hz), 133.2 (d,  $J = 128.2$  Hz), 132.9 (d,  $J = 128.2$  Hz, only the peak at 133.5 is visible, the other is overlapping), 132.4 (d,  $J = 9.3$  Hz), 132.3 (d,  $J = 9.6$  Hz), 131.8 (d,  $J = 2.7$  Hz), 131.6 (d,  $J = 2.9$  Hz), 129.1, 128.5 (d,  $J = 12.6$  Hz), 128.3 (d,  $J = 12.6$  Hz), 113.8, 101.2 (d,  $J = 5.2$  Hz),



73.9, 55.4, 53.3, -1.3; HRMS Calcd for C<sub>26</sub>H<sub>31</sub>NO<sub>2</sub>PSi [M + H]<sup>+</sup>: 448.1862; Found: 448.1847. [α]<sub>D</sub><sup>20</sup> = -93.5 (c = 2.35, CHCl<sub>3</sub>) for a 98:2 er sample. The enantiomeric purity of this compound was determined by HPLC analysis in comparison with authentic racemic material (Chiracel OD-H, 98.5:1.5 hexanes:*i*-PrOH, 0.5 mL/min, 220 nm): *t*<sub>R</sub> of **4h**: 37 min (major) and 52 min (minor).

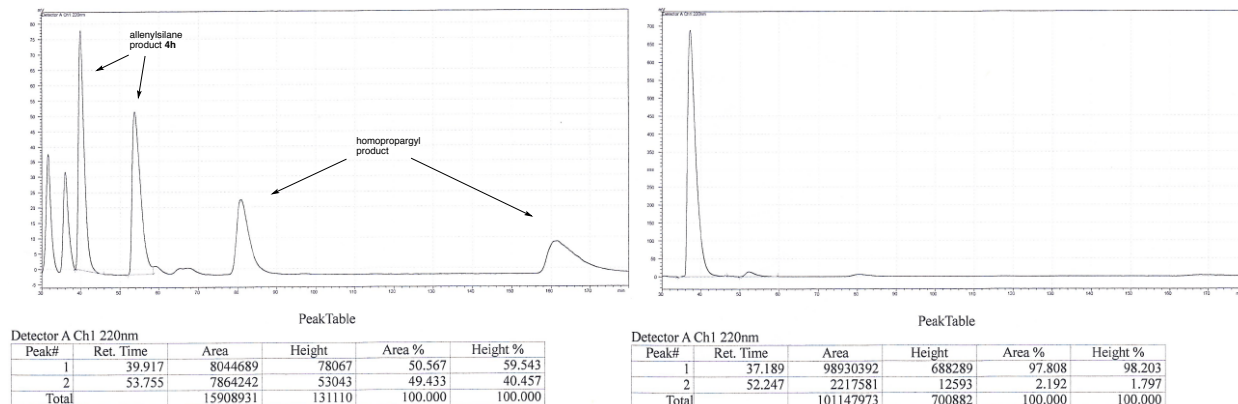

| Retention Time | Area    | Area % | Retention Time | Area     | Area % |
|----------------|---------|--------|----------------|----------|--------|
| 39.917         | 8044689 | 50.567 | 37.189         | 98930392 | 97.808 |
| 53.755         | 7864242 | 49.433 | 52.247         | 2217581  | 2.192  |

**(R)-P,P-Diphenyl-N-(1-(pyridin-3-yl)-2-(trimethylsilyl)buta-2,3-dien-1-yl)phosphinic amide (4i)**: IR (neat): 3059 (w), 2958 (w), 2224 (w), 1928 (m), 1591 (w), 1578 (w), 1438 (m), 1426 (m), 1250 (m), 1193 (m), 1123 (m), 1109 (m), 1081 (m), 906 (s), 839 (s), 723 (s), 695 (s), 536 (m), 520 (m) cm<sup>-1</sup>; <sup>1</sup>H NMR (400 MHz, CDCl<sub>3</sub>): δ 8.61–8.31 (1H, br s), 7.87–7.82 (2H, m), 7.73–7.68 (2H, m), 7.57 (1H, br d, *J* = 7.2 Hz), 7.53–7.29 (7H, m), 7.26–7.14 (1H, br s), 4.88 (1H, dd, *J* = 10.8, 2.4 Hz), 4.77–4.74 (2H, m), 3.83 (1H, br t, *J* = 8.4 Hz), -0.14 (9H, s); <sup>13</sup>C NMR (100 MHz, CDCl<sub>3</sub>): δ 207.7, 149.1, 148.7, 135.6, 132.5 (d, *J* = 130.4 Hz), 132.4, 132.3 (d, *J* = 9.6 Hz) 132.2 (d, *J* = 128.8 Hz), 132.1 (d, *J* = 2.9 Hz), 132.1 (d, *J* = 9.7 Hz), 131.9 (d, *J* = 2.9 Hz), 128.8, 128.7 (d, *J* = 12.4 Hz), 128.4 (d, *J* = 12.4 Hz), 100.3 (d, *J* = 4.9 Hz), 74.6, 51.7, -1.3; HRMS Calcd for C<sub>24</sub>H<sub>28</sub>N<sub>2</sub>OPSi [M + H]<sup>+</sup>: 419.1709; Found: 419.1699. [α]<sub>D</sub><sup>20</sup> = -35.2 (c = 1.42, CHCl<sub>3</sub>) for a 96:4 er sample. The enantiomeric purity of this compound was determined by HPLC analysis in comparison with authentic racemic material (Chiracel AZ-H, 92:8 hexanes:*i*-PrOH, 0.7 mL/min, 220 nm): *t*<sub>R</sub> of **4i**: 135 min (minor) and 167 min (major).

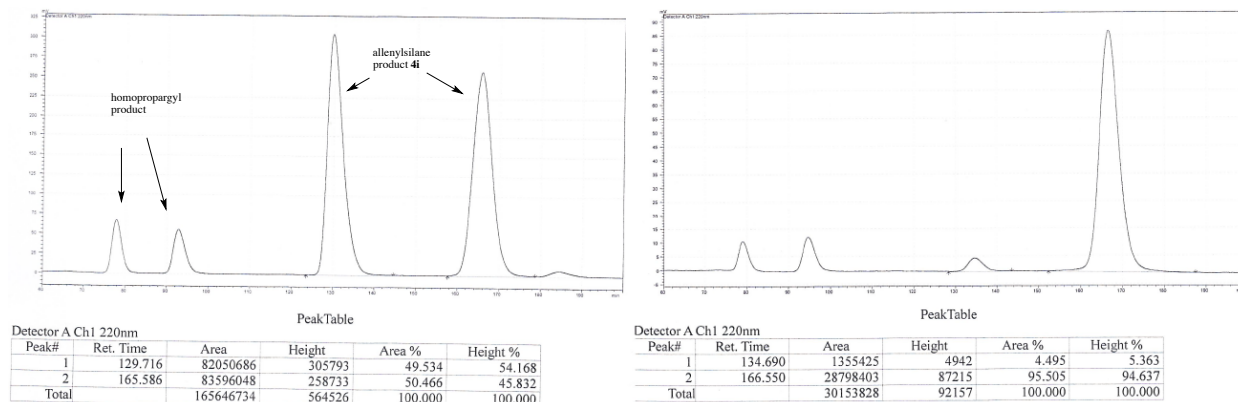

| Retention Time | Area     | Area % | Retention Time | Area     | Area % |
|----------------|----------|--------|----------------|----------|--------|
| 129.716        | 81602009 | 49.593 | 134.690        | 1355425  | 4.495  |
| 165.586        | 82940126 | 50.407 | 166.550        | 28798403 | 95.505 |

**(R)-N-(1-(Furan-2-yl)-2-(trimethylsilyl)buta-2,3-dien-1-yl)-P,P-diphenylphosphinic amide (4j):** IR (neat): 3374 (w), 3182 (w, br), 3057 (w), 2956 (w), 1929 (m), 1438 (m), 1248 (m), 1194 (m), 1148 (w), 1123 (m), 1109 (m), 1071 (m), 1011 (m), 838 (s), 748 (m), 723 (s), 694 (s), 549 (m), 525 (s)  $\text{cm}^{-1}$ ;  $^1\text{H}$  NMR (400 MHz,  $\text{CDCl}_3$ ):  $\delta$  7.87–7.78 (4H, m), 7.51–7.34 (6H, m), 7.28 (1H, dd,  $J = 1.6, 0.8$  Hz), 6.17 (1H, dd,  $J = 3.2, 1.6$  Hz), 6.02–6.01 (1H, m), 4.87–4.81 (2H, m), 4.73–4.69 (1H, m), 3.77 (1H, t,  $J = 8.8$  Hz), –0.09 (9H, s);  $^{13}\text{C}$  NMR (100 MHz,  $\text{CDCl}_3$ ):  $\delta$  207.9, 154.5 (d,  $J = 4.2$  Hz), 142.0, 132.7 (d,  $J = 129.6$  Hz, only the peak at 133.3 is visible, the other is overlapping), 132.4 (d,  $J = 9.8$  Hz), 132.3 (d,  $J = 129.8$  Hz), 132.1 (d,  $J = 9.8$  Hz), 132.0 (d,  $J = 2.4$  Hz, only the peak at 132.0 is visible, the other is overlapping), 131.8 (d,  $J = 2.9$  Hz), 128.6 (d,  $J = 12.7$  Hz), 128.4 (d,  $J = 12.8$  Hz), 110.3, 107.5, 99.0 (d,  $J = 4.7$  Hz), 74.4, 47.4, –1.6; HRMS Calcd for  $\text{C}_{23}\text{H}_{27}\text{NO}_2\text{PSi}$   $[\text{M} + \text{H}]^+$ : 408.1549; Found: 408.1532.  $[\alpha]_D^{20} = -46.9$  ( $c = 2.13$ ,  $\text{CHCl}_3$ ) for a 97:3 er sample. The enantiomeric purity of this compound was determined by HPLC analysis in comparison with authentic racemic material (Chiracel OZ–H, 97:3 hexanes:*i*-PrOH, 0.7 mL/min, 220 nm):  $t_R$  of **4j**: 87 min (minor) and 138 min (major).

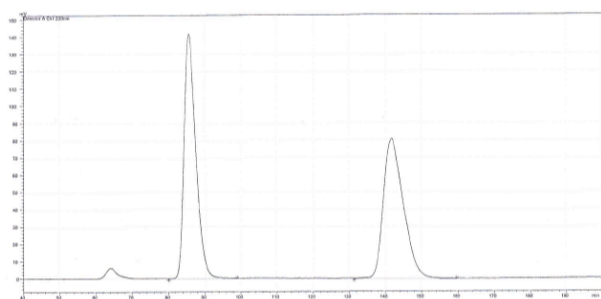

Detector A Ch1 220nm

| Peak# | Ret. Time | Area     | Height | Area %  | Height % |
|-------|-----------|----------|--------|---------|----------|
| 1     | 85.566    | 32003456 | 141991 | 50.782  | 63.632   |
| 2     | 141.721   | 31018009 | 81154  | 49.218  | 36.368   |
| Total |           | 63021465 | 223145 | 100.000 | 100.000  |

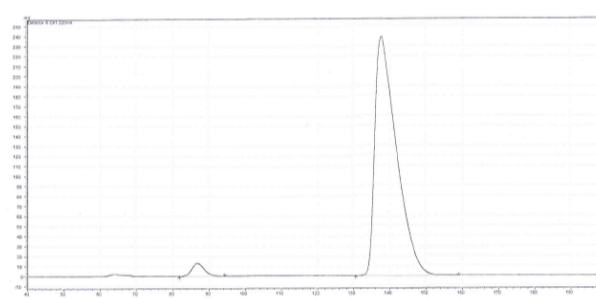

Detector A Ch1 220nm

| Peak# | Ret. Time | Area      | Height | Area %  | Height % |
|-------|-----------|-----------|--------|---------|----------|
| 1     | 86.704    | 3334652   | 13182  | 3.263   | 5.227    |
| 2     | 137.811   | 98853376  | 239003 | 96.737  | 94.773   |
| Total |           | 102188028 | 252185 | 100.000 | 100.000  |

| Retention Time | Area     | Area % | Retention Time | Area     | Area % |
|----------------|----------|--------|----------------|----------|--------|
| 85.566         | 31629862 | 50.903 | 86.704         | 3334652  | 3.263  |
| 141.721        | 30508057 | 49.097 | 137.811        | 98853376 | 96.737 |

**(R)-P,P-Diphenyl-N-(1-(thiophen-3-yl)-2-(trimethylsilyl)buta-2,3-dien-1-yl)phosphinic amide (4k):** IR (neat): 3192 (w, br), 3057 (w), 2956 (w), 1929 (m), 1438 (m), 1414 (w), 1248 (m), 1195 (m), 1123 (m), 1110 (m), 1080 (m), 840 (s), 751 (m), 725 (m), 696 (s), 546 (m), 526 (m)  $\text{cm}^{-1}$ ;  $^1\text{H}$  NMR (400 MHz,  $\text{CDCl}_3$ ):  $\delta$  7.89–7.84 (2H, m), 7.80–7.75 (2H, m), 7.51–7.41 (4H, m), 7.37–7.33 (2H, m), 7.19 (1H, dd,  $J = 4.8, 2.8$  Hz), 7.07 (1H, dd,  $J = 5.2, 1.2$  Hz), 6.94 (1H, br d, 1.6 Hz), 4.85–4.79 (2H, m), 4.71–4.68 (1H, m), 3.73–3.67 (1H, m), –0.13 (9H, s);  $^{13}\text{C}$  NMR (100 MHz,  $\text{CDCl}_3$ ):  $\delta$  207.7, 144.4 (d,  $J = 3.6$  Hz), 132.9 (d,  $J = 129.0$  Hz, only the peak at 133.5 is visible, the other is overlapping), 132.7 (d,  $J = 128.6$  Hz), 132.3 (d,  $J = 9.7$  Hz), 132.3 (d,  $J = 9.3$  Hz), 131.9 (d,  $J = 2.7$  Hz), 131.8 (d,  $J = 2.5$  Hz), 128.5 (d,  $J = 12.5$  Hz), 128.4 (d,  $J = 12.4$

Hz), 127.5, 126.1, 122.5, 100.8 (d,  $J = 5.1$  Hz), 74.0, 49.2,  $-1.4$ ; HRMS Calcd for  $C_{23}H_{27}NOPSSi [M + H]^+$ : 424.1320; Found: 424.1306.  $[\alpha]_D^{20} = +136.2$  ( $c = 1.10$ ,  $CHCl_3$ ) for a 98:2 er sample. The enantiomeric purity of this compound was determined by HPLC analysis in comparison with authentic racemic material (Chiracel OZ-H, 97:3 hexanes:*i*-PrOH, 0.7 mL/min, 220 nm):  $t_R$  of **4k**: 75 min (minor) and 116 min (major).

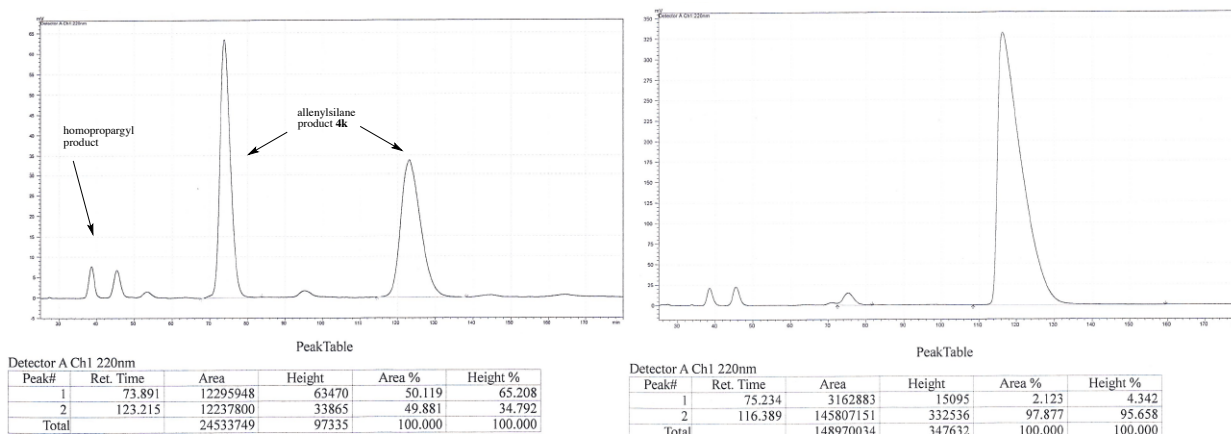

| Retention Time | Area     | Area % | Retention Time | Area      | Area % |
|----------------|----------|--------|----------------|-----------|--------|
| 73.891         | 12295948 | 50.119 | 75.234         | 3162883   | 2.123  |
| 123.215        | 12237800 | 49.881 | 116.389        | 145807151 | 97.877 |

***P,P*-Diphenyl-*N*-(1-phenyl-4-(trimethylsilyl)but-3-yn-1-yl)phosphinic amide (5a)**: IR (neat): 3158 (w, br), 2958 (w), 2175 (m), 1438 (m), 1249 (m), 1184 (m), 1122 (m), 1110 (m), 838 (s), 754 (m), 723 (s), 693 (s), 539 (m), 518 (s)  $cm^{-1}$ ;  $^1H$  NMR (400 MHz,  $CDCl_3$ ):  $\delta$  7.89–7.84 (2H, m), 7.83–7.78 (2H, m), 7.50–7.39 (4H, m), 7.36–7.31 (2H, m), 7.27–7.18 (5H, m), 4.41 (1H, dtd,  $J = 15.2, 6.4, 4.8$  Hz), 3.76 (1H, dd,  $J = 10.4, 6.8$  Hz), 2.88 (1H, dd,  $J = 16.8, 6.4$  Hz), 2.72 (1H, dd,  $J = 16.8, 4.4$  Hz), 0.06 (9H, s);  $^{13}C$  NMR (100 MHz,  $CDCl_3$ ):  $\delta$  142.2 (d,  $J = 5.3$  Hz), 132.9 (d,  $J = 126.8$  Hz), 132.5 (d,  $J = 9.4$  Hz), 132.3 (d,  $J = 130.5$  Hz), 132.0 (d,  $J = 2.9$  Hz), 132.0 (d,  $J = 9.7$  Hz), 132.0 (d,  $J = 2.7$  Hz, only the peak at 132.0 is visible, the other is overlapping), 128.7 (d,  $J = 13.5$  Hz), 128.5 (d,  $J = 13.1$  Hz), 128.4, 127.5, 126.6, 102.8, 89.0, 53.0, 31.0 (d,  $J = 4.4$  Hz),  $-0.1$ ; HRMS Calcd for  $C_{25}H_{29}NOPSi [M + H]^+$ : 418.1756; Found: 418.1776.

***(S)*-*P,P*-Diphenyl-*N*-(1-phenylbut-3-yn-1-yl)phosphinic amide (5b)**: IR (neat): 3132 (w, br), 1456 (m), 1185 (s), 1122 (m), 1070 (m), 754 (m), 725 (m), 697 (s), 540 (m)  $cm^{-1}$ ;  $^1H$  NMR (400 MHz,  $CDCl_3$ ):  $\delta$  7.87–7.82 (2H, m), 7.80–7.75 (2H, m), 7.48–7.37 (4H, m), 7.34–7.20 (7H, m), 4.40 (1H, dddd,  $J = 10.4, 10.4, 6.4, 4.0$  Hz), 3.64 (1H, dd,  $J = 10.8, 6.8$  Hz), 2.88 (1H, ddd,  $J = 16.8, 6.4, 2.8$  Hz), 2.71 (1H, ddd,  $J = 16.8, 4.4, 2.8$  Hz), 1.92 (1H, t,  $J = 2.6$  Hz);  $^{13}C$  NMR (100 MHz,  $CDCl_3$ ):  $\delta$  142.0 (d,  $J = 6.1$  Hz), 132.9 (d,  $J = 126.9$  Hz), 132.6 (d,  $J = 9.8$  Hz), 132.1 (d,  $J = 2.6$  Hz), 132.1 (d,  $J = 3.3$  Hz, only peak at 132.1 visible, the other is overlapping), 132.0 (d,  $J = 130.4$  Hz), 130.0 (d,  $J = 9.9$  Hz), 128.7 (d,  $J = 12.7$  Hz), 128.6 (d,  $J = 12.7$  Hz), 128.6, 127.6, 126.6, 80.1, 72.1, 52.9, 29.4 (d,  $J = 3.5$  Hz); HRMS Calcd for  $C_{22}H_{21}NOP [M + H]^+$ : 346.1361; Found: 346.1365.  $[\alpha]_D^{20} = -44.2$  ( $c = 1.13$ ,  $CHCl_3$ ) for a 92:8 er sample. The enantiomeric purity of this compound was determined by HPLC analysis in comparison with authentic

racemic material (Chiracel OJ-H, 92:8 hexanes:*i*-PrOH, 0.8 mL/min, 220 nm):  $t_R$  of **5b**: 13 min (major) and 21 min (minor).

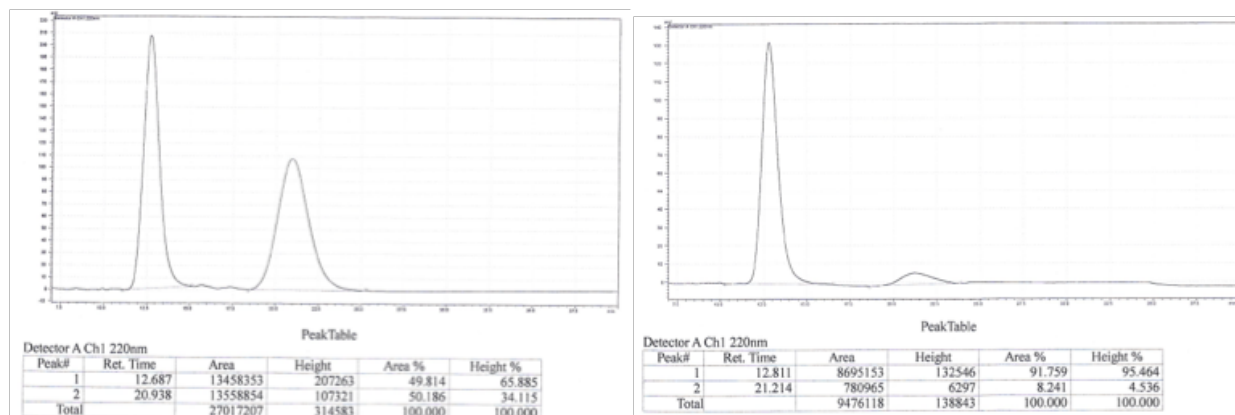

| Retention Time | Area     | Area % | Retention Time | Area    | Area % |
|----------------|----------|--------|----------------|---------|--------|
| 12.687         | 13458353 | 49.814 | 12.811         | 8695153 | 91.759 |
| 20.938         | 13558854 | 50.186 | 21.214         | 780965  | 8.241  |

**(R)-P,P-Diphenyl-N-(1-phenyl-4-(trimethylsilyl)hexa-4,5-dien-3-yl)phosphinic amide (8a):**

IR (neat): 3190 (w, br), 3025 (w), 2953 (w), 2858 (w), 1924 (m), 1438 (m), 1248 (m), 1191 (m), 1121 (m), 1109 (m), 1070 (m), 836 (s), 749 (m), 722 (s), 694 (s), 552 (s), 524 (s)  $\text{cm}^{-1}$ ;  $^1\text{H}$  NMR (500 MHz,  $\text{CDCl}_3$ ):  $\delta$  7.93–7.85 (4H, m), 7.52–7.40 (6H, m), 7.25–7.22 (2H, m), 7.19–7.12 (3H, m), 4.72 (1H, dd,  $J = 11.0, 2.5$  Hz), 4.58 (1H, dd,  $J = 11.0, 2.0$  Hz), 3.70–3.63 (1H, m), 3.31 (1H, t,  $J = 9.5$  Hz), 2.80–2.69 (2H, m), 2.05–1.98 (1H, m), 1.79 (1H, ddt,  $J = 14.0, 10.0, 6.5$  Hz), –0.02 (9H, s);  $^{13}\text{C}$  NMR (100 MHz,  $\text{CDCl}_3$ ):  $\delta$  208.2, 142.1, 133.6 (d,  $J = 128.7$  Hz), 132.7 (d,  $J = 128.7$  Hz), 132.6 (d,  $J = 9.7$  Hz), 132.0 (d,  $J = 9.3$  Hz), 131.9 (d,  $J = 2.9$  Hz), 131.8 (d,  $J = 2.7$  Hz), 128.7, 128.6 (d,  $J = 12.6$  Hz), 128.5 (d,  $J = 13.0$  Hz), 128.4, 125.8, 100.7 (d,  $J = 5.2$  Hz), 73.1, 50.3, 40.8, 31.6, –1.1; HRMS Calcd for  $\text{C}_{27}\text{H}_{33}\text{NOPSi}$   $[\text{M} + \text{H}]^+$ : 446.2069; Found: 446.2060.  $[\alpha]_D^{20} = +17.8$  ( $c = 1.12$ ,  $\text{CHCl}_3$ ) for a 97:3 er sample. The enantiomeric purity of this compound was determined by HPLC analysis in comparison with authentic racemic material (Chiracel OD-H, 99:1 hexanes:*i*-PrOH, 0.5 mL/min, 220 nm):  $t_R$  of **8a**: 79 min (major) and 89 min (minor).

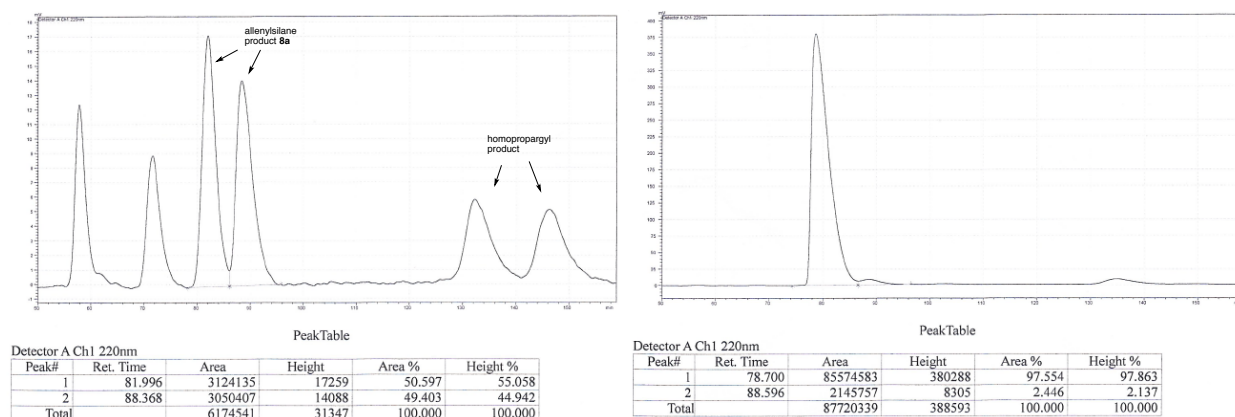

| Retention Time | Area    | Area % | Retention Time | Area     | Area % |
|----------------|---------|--------|----------------|----------|--------|
| 81.996         | 3124135 | 50.597 | 78.700         | 85574583 | 97.554 |
| 88.368         | 3050407 | 49.403 | 88.596         | 2145757  | 2.446  |

**(R)-N-(6-Methyl-3-(trimethylsilyl)hepta-1,2-dien-4-yl)-P,P-diphenylphosphinic amide (8b):**

IR (neat): 3193 (w, br), 3058 (w), 2954 (m), 1925 (m), 1438 (m), 1248 (m), 1193 (m), 1122 (m), 1109 (m), 836 (s), 748 (s), 722 (s), 694 (s), 558 (s), 524 (s)  $\text{cm}^{-1}$ ;  $^1\text{H}$  NMR (400 MHz,  $\text{CDCl}_3$ ):  $\delta$  7.94–7.86 (4H, m), 7.48–7.39 (6H, m), 4.66 (1H, dd,  $J = 10.8, 2.0$  Hz), 4.51 (1H, dd,  $J = 10.8, 1.2$  Hz), 3.57–3.49 (1H, m), 3.08 (1H, dd,  $J = 10.4, 8.8$  Hz), 1.94 (1H, dq,  $J = 13.6, 6.8$  Hz), 1.40 (2H, t,  $J = 7.2$  Hz), 0.83 (6H, dd,  $J = 6.8, 2.4$  Hz),  $-0.01$  (9H, s);  $^{13}\text{C}$  NMR (100 MHz,  $\text{CDCl}_3$ ):  $\delta$  208.4, 133.6 (d,  $J = 127.8$  Hz), 132.8 (d,  $J = 128.8$  Hz), 132.7 (d,  $J = 9.4$  Hz), 132.1 (d,  $J = 9.2$  Hz), 131.8 (d,  $J = 2.8$  Hz), 131.7 (d,  $J = 2.5$  Hz), 128.5 (d,  $J = 12.1$  Hz), 128.4 (d,  $J = 12.1$  Hz), 101.5 (d,  $J = 4.6$  Hz), 72.8, 49.3, 24.8, 23.5, 22.1,  $-1.0$ ; HRMS Calcd for  $\text{C}_{23}\text{H}_{33}\text{NOPSi}$   $[\text{M} + \text{H}]^+$ : 398.2069; Found: 398.2075.  $[\alpha]_{\text{D}}^{20} = +60.8$  ( $c = 1.48$ ,  $\text{CHCl}_3$ ) for a 98:2 er sample. The enantiomeric purity of this compound was determined by HPLC analysis in comparison with authentic racemic material (Chiracel OD-H, 99:1 hexanes:*i*-PrOH, 0.6 mL/min, 220 nm):  $t_{\text{R}}$  of **8b**: 21 min (major) and 41 min (minor).

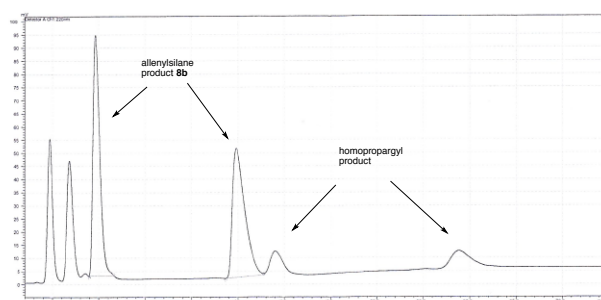

Detector A Ch1 220nm

| Peak# | Ret. Time | Area    | Height | Area %  | Height % |
|-------|-----------|---------|--------|---------|----------|
| 1     | 19.637    | 4741801 | 91631  | 50.997  | 65.091   |
| 2     | 34.790    | 4556349 | 49142  | 49.003  | 34.909   |
| Total |           | 9298150 | 140774 | 100.000 | 100.000  |

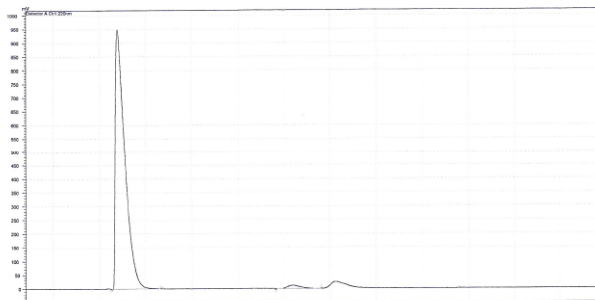

Detector A Ch1 220nm

| Peak# | Ret. Time | Area     | Height | Area %  | Height % |
|-------|-----------|----------|--------|---------|----------|
| 1     | 21.935    | 66882050 | 947740 | 98.507  | 98.861   |
| 2     | 40.945    | 1013880  | 10916  | 1.493   | 1.139    |
| Total |           | 67895930 | 958656 | 100.000 | 100.000  |

| Retention Time | Area    | Area % | Retention Time | Area     | Area % |
|----------------|---------|--------|----------------|----------|--------|
| 19.637         | 4741801 | 50.997 | 21.935         | 66882050 | 98.507 |
| 34.790         | 4556349 | 49.003 | 40.945         | 1013880  | 1.493  |

**(R)-N-(1-Cyclohexyl-2-(trimethylsilyl)buta-2,3-dien-1-yl)-P,P-diphenylphosphinic amide (8c):**

IR (neat): 2924 (m), 2851 (m), 1926 (m), 1438 (m), 1248 (m), 1202 (m), 1121 (m), 839 (s), 697 (s), 529 (m)  $\text{cm}^{-1}$ ;  $^1\text{H}$  NMR (400 MHz,  $\text{CDCl}_3$ ):  $\delta$  7.94–7.84 (4H, m), 7.50–7.38 (6H, m), 4.70 (1H, dd,  $J = 11.2, 2.4$  Hz), 4.51 (1H, dd,  $J = 10.8, 2.0$  Hz), 3.44–3.37 (1H, m), 3.26 (1H, t,  $J = 10.4$  Hz), 1.80–1.72 (3H, m), 1.63–1.46 (3H, m), 1.37–1.29 (1H, m), 1.21–1.11 (3H, m), 0.98–0.87 (1H, m),  $-0.03$  (9H, s);  $^{13}\text{C}$  NMR (100 MHz,  $\text{CDCl}_3$ ):  $\delta$  208.6, 133.7 (d,  $J = 128.2$  Hz), 132.8 (d,  $J = 9.7$  Hz), 132.7 (d,  $J = 127.4$  Hz, only peak at 133.3 is visible, the other is overlapping), 132.1 (d,  $J = 9.3$  Hz), 131.8 (d,  $J = 2.5$  Hz), 131.7 (d,  $J = 2.9$  Hz), 128.5 (d,  $J = 12.2$  Hz), 128.3 (d,  $J = 12.4$  Hz), 99.9 (d,  $J = 4.0$  Hz), 72.6, 55.5, 44.2 (d,  $J = 3.3$  Hz), 31.1, 26.7, 26.5, 26.4, 26.3,  $-1.0$ ; HRMS Calcd for  $\text{C}_{25}\text{H}_{35}\text{NOPSi}$   $[\text{M} + \text{H}]^+$ : 424.2226; Found: 424.2228.



$[\alpha]_D^{20} = +33.1$  ( $c = 1.51$ ,  $\text{CHCl}_3$ ) for a 96:4 er sample. The enantiomeric purity of this compound was determined by HPLC analysis in comparison with authentic racemic material (Chiracel OD–H, 99:1 hexanes:*i*-PrOH, 0.5 mL/min, 220 nm):  $t_R$  of **8c**: 18 min (major) and 23 min (minor).

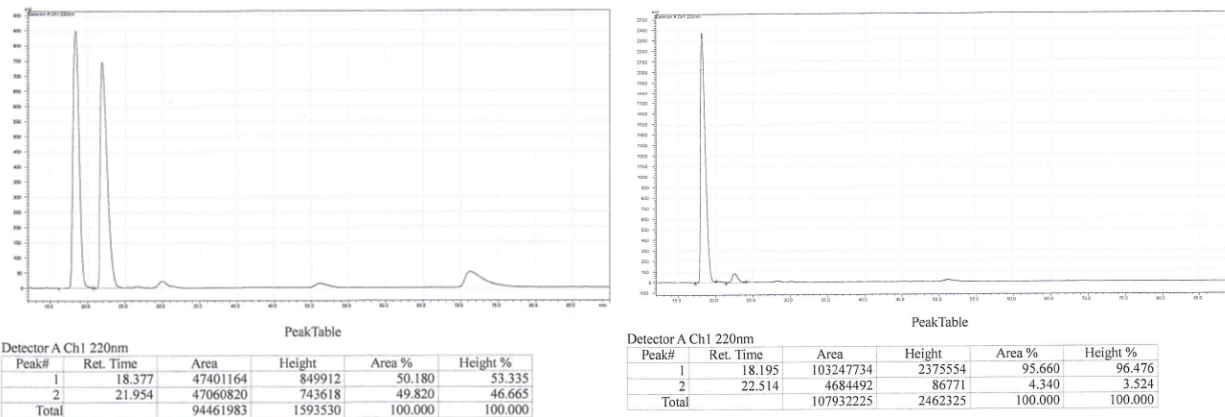

| Retention Time | Area     | Area % | Retention Time | Area      | Area % |
|----------------|----------|--------|----------------|-----------|--------|
| 18.377         | 47401164 | 50.180 | 18.195         | 103247734 | 95.660 |
| 21.954         | 47060820 | 49.820 | 22.514         | 4684492   | 4.340  |

**(*R,E*)-*P,P*-Diphenyl-*N*-(1-phenyl-4-(trimethylsilyl)hexa-1,4,5-trien-3-yl)phosphinic amide (**9a**):** IR (neat): 3184 (w, br), 3056 (w), 2956 (w), 1927 (m), 1493 (m), 1248 (m), 1193 (m), 1123 (m), 1110 (m), 839 (s), 752 (m), 724 (m), 694 (m), 541 (m)  $\text{cm}^{-1}$ ;  $^1\text{H}$  NMR (400 MHz,  $\text{CDCl}_3$ ):  $\delta$  7.95–7.88 (4H, m), 7.52–7.37 (6H, m), 7.32–7.19 (5H, m), 6.29 (1H, d,  $J = 16.0$ , Hz), 6.11 (1H, dd,  $J = 15.6$ , 7.2 Hz), 4.79 (1H, dd,  $J = 11.2$ , 2.8 Hz), 4.66 (1H, dd,  $J = 10.8$ , 2.0 Hz), 4.38–4.31 (1H, m), 3.52 (1H, t,  $J = 8.0$  Hz),  $-0.06$  (9H, s);  $^{13}\text{C}$  NMR (100 MHz,  $\text{CDCl}_3$ ):  $\delta$  208.0, 136.7, 133.1 (d,  $J = 129.4$  Hz, only the peak at 133.7 is visible, the other is overlapping), 132.4 (d,  $J = 128.0$  Hz, only the peak at 133.5 is visible, the other is overlapping), 132.4 (d,  $J = 9.2$  Hz), 132.3 (d,  $J = 9.6$  Hz), 131.9 (d,  $J = 2.8$  Hz), 131.8 (d,  $J = 2.6$  Hz), 131.6 (d,  $J = 3.5$  Hz), 130.6, 128.6 (d,  $J = 12.4$  Hz), 128.5, 128.4 (d,  $J = 12.0$  Hz, only the peak at 128.4 is visible, the other is overlapping), 127.7, 126.7, 99.8 (d,  $J = 5.9$  Hz), 73.8, 52.2,  $-1.0$ ; HRMS Calcd for  $\text{C}_{27}\text{H}_{31}\text{NO}_2\text{PSi}$   $[\text{M} + \text{H}]^+$ : 444.1913; Found: 444.1900.  $[\alpha]_D^{20} = -129.9$  ( $c = 1.00$ ,  $\text{CHCl}_3$ ) for a 96:4 er sample. The enantiomeric purity of this compound was determined by HPLC analysis in comparison with authentic racemic material (Chiracel OD–H, 98:2 hexanes:*i*-PrOH, 0.6 mL/min, 220 nm):  $t_R$  of **9a**: 20 min (major) and 30 min (minor).

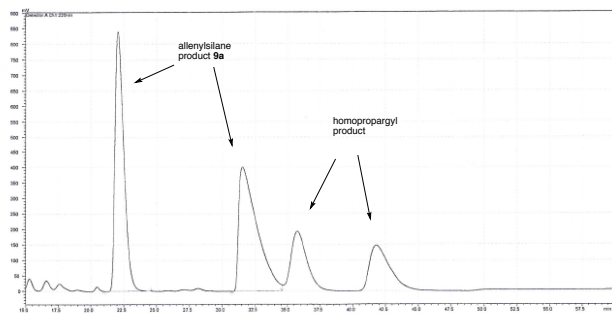

| Detector A Ch1 220nm |           |          |         |         |          |
|----------------------|-----------|----------|---------|---------|----------|
| PeakTable            |           |          |         |         |          |
| Peak#                | Ret. Time | Area     | Height  | Area %  | Height % |
| 1                    | 22.072    | 38952953 | 839824  | 50.127  | 67.730   |
| 2                    | 31.551    | 38755475 | 400138  | 49.873  | 32.270   |
| Total                |           | 77708428 | 1239962 | 100.000 | 100.000  |

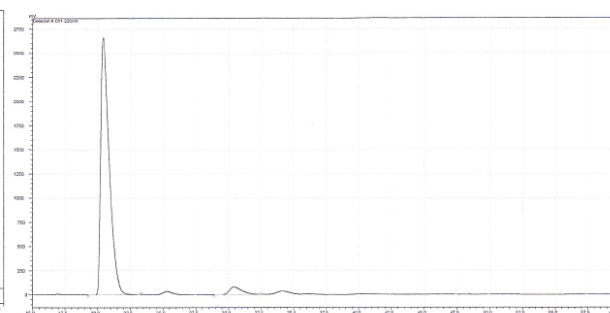

| Detector A Ch1 220nm |           |           |         |         |          |
|----------------------|-----------|-----------|---------|---------|----------|
| PeakTable            |           |           |         |         |          |
| Peak#                | Ret. Time | Area      | Height  | Area %  | Height % |
| 1                    | 20.421    | 121121330 | 2662169 | 95.749  | 97.053   |
| 2                    | 30.414    | 5377738   | 80828   | 4.251   | 2.947    |
| Total                |           | 126499068 | 2742996 | 100.000 | 100.000  |

| Retention Time | Area     | Area % | Retention Time | Area      | Area % |
|----------------|----------|--------|----------------|-----------|--------|
| 22.072         | 38952953 | 50.127 | 20.421         | 121121330 | 95.749 |
| 31.551         | 38755475 | 49.873 | 30.414         | 5377738   | 4.251  |

**(*R,E*)-*N*-(1-(4-Methoxyphenyl)-4-(trimethylsilyl)hexa-1,4,5-trien-3-yl)-*P,P*-diphenylphosphinic amide (9b):**

IR (neat): 3178 (w, br), 2955 (w), 1926 (m), 1607 (m), 1510 (s), 1438 (m), 1248 (s), 1194 (s), 1122 (m), 1035 (m), 839 (s), 724 (s), 696 (s), 527 (m)  $\text{cm}^{-1}$ ;  $^1\text{H}$  NMR (400 MHz,  $\text{CDCl}_3$ ):  $\delta$  7.94–7.86 (4H, m), 7.51–7.36 (6H, m), 7.17 (2H, d,  $J = 8.8$  Hz), 6.80 (2H, d,  $J = 8.8$  Hz), 6.22 (1H, d,  $J = 15.6$  Hz), 5.95 (1H, dd,  $J = 15.6, 7.2$  Hz), 4.77 (1H, dd,  $J = 11.2, 2.8$  Hz), 4.64 (1H, dd,  $J = 10.8, 2.4$  Hz), 4.35–4.28 (1H, m), 3.80 (3H, s), 3.49 (1H, t,  $J = 8.4$  Hz),  $-0.03$  (9H, s);  $^{13}\text{C}$  NMR (100 MHz,  $\text{CDCl}_3$ ):  $\delta$  207.9, 159.3, 133.3 (d,  $J = 129.5$  Hz), 133.0 (d,  $J = 129.5$  Hz), 132.4 (d,  $J = 9.2$  Hz), 132.3 (d,  $J = 9.6$  Hz), 131.8 (d,  $J = 2.9$  Hz), 131.8 (d,  $J = 2.8$  Hz), 130.2, 129.6, 129.5, 128.5 (d,  $J = 12.2$  Hz), 128.4 (d,  $J = 12.5$  Hz), 127.9, 114.0, 100.0 (d,  $J = 5.8$  Hz), 73.7, 55.4, 52.4,  $-1.0$ ; HRMS Calcd for  $\text{C}_{28}\text{H}_{33}\text{NO}_2\text{PSi}$   $[\text{M} + \text{H}]^+$ : 474.2018; Found: 474.1996.  $[\alpha]_D^{20} = -149.9$  ( $c = 1.00$ ,  $\text{CHCl}_3$ ) for a 96:4 er sample. The enantiomeric purity of this compound was determined by HPLC analysis in comparison with authentic racemic material (Chiracel OZ-H, 97:3 hexanes:*i*-PrOH, 0.8 mL/min, 220 nm):  $t_R$  of **9b**: 69 min (major) and 102 min (minor).

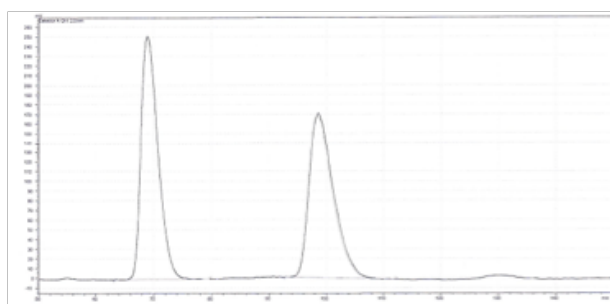

| Detector A Ch1 220nm |           |           |        |         |          |
|----------------------|-----------|-----------|--------|---------|----------|
| PeakTable            |           |           |        |         |          |
| Peak#                | Ret. Time | Area      | Height | Area %  | Height % |
| 1                    | 68.912    | 51417967  | 251693 | 50.686  | 59.588   |
| 2                    | 98.616    | 50026172  | 170699 | 49.314  | 40.412   |
| Total                |           | 101444138 | 422392 | 100.000 | 100.000  |

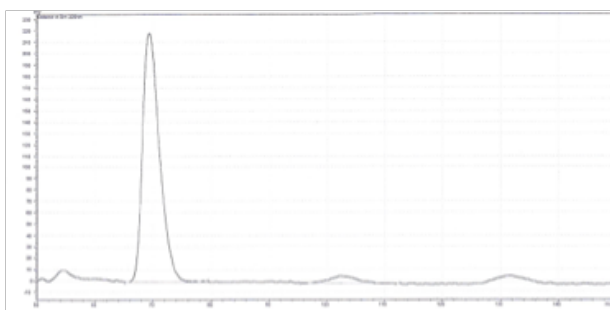

| Detector A Ch1 220nm |           |          |        |         |          |
|----------------------|-----------|----------|--------|---------|----------|
| PeakTable            |           |          |        |         |          |
| Peak#                | Ret. Time | Area     | Height | Area %  | Height % |
| 1                    | 69.336    | 44551661 | 218824 | 95.900  | 97.277   |
| 2                    | 102.282   | 1904654  | 6125   | 4.100   | 2.723    |
| Total                |           | 46456314 | 224948 | 100.000 | 100.000  |

| Retention Time | Area     | Area % | Retention Time | Area     | Area % |
|----------------|----------|--------|----------------|----------|--------|
| 68.912         | 51417967 | 50.686 | 69.336         | 44551661 | 95.900 |

|        |          |        |         |         |       |
|--------|----------|--------|---------|---------|-------|
| 98.616 | 50026172 | 49.314 | 102.282 | 1904654 | 4.100 |
|--------|----------|--------|---------|---------|-------|

**(*R,E*)-*N*-(1-(2-Nitrophenyl)-4-(trimethylsilyl)hexa-1,4,5-trien-3-yl)-*P,P*-diphenylphosphinic amide (**9c**):** IR (neat): 3170 (w, br), 3060 (w), 2957 (w), 1927 (m), 1523 (s), 1438 (m), 1346 (m), 1249 (m), 1192 (m), 1123 (m), 1110 (m), 839 (s), 751 (m), 725 (m), 697 (m), 555 (m)  $\text{cm}^{-1}$ ;  $^1\text{H}$  NMR (400 MHz,  $\text{CDCl}_3$ ):  $\delta$  7.96–7.87 (5H, m), 7.53–7.40 (8H, m), 7.39–7.35 (1H, m), 6.80 (1H, dd,  $J = 15.6$  Hz), 6.17 (1H, dd,  $J = 15.6, 7.2$  Hz), 4.78 (1H, dd,  $J = 11.2, 2.4$  Hz), 4.67 (1H, dd,  $J = 11.2, 2.0$  Hz), 4.35–4.28 (1H, m), 3.54 (1H, dd,  $J = 9.2, 7.2$  Hz),  $-0.08$  (9H, s);  $^{13}\text{C}$  NMR (100 MHz,  $\text{CDCl}_3$ ):  $\delta$  208.2, 147.7, 137.3 (d,  $J = 3.5$  Hz), 133.3, 133.1 (d,  $J = 128.5$  Hz), 132.7, 132.5 (d,  $J = 127.9$  Hz), 132.4 (d,  $J = 9.7$  Hz), 132.3 (d,  $J = 9.5$  Hz), 132.1 (d,  $J = 2.6$  Hz), 132.0 (d,  $J = 2.8$  Hz), 129.4, 128.7 (d,  $J = 12.6$  Hz), 128.6 (d,  $J = 12.4$  Hz), 125.7, 124.6, 99.2 (d,  $J = 5.9$  Hz), 74.0, 52.3,  $-1.1$ ; HRMS Calcd for  $\text{C}_{27}\text{H}_{30}\text{N}_2\text{O}_3\text{PSi}$   $[\text{M} + \text{H}]^+$ : 489.1763; Found: 489.1760.  $[\alpha]_D^{20} = -90.8$  ( $c = 1.10$ ,  $\text{CHCl}_3$ ) for a 96:4 er sample. The enantiomeric purity of this compound was determined by HPLC analysis in comparison with authentic racemic material (Chiracel OD-H, 98:2 hexanes:*i*-PrOH, 0.5 mL/min, 220 nm):  $t_R$  of **9c**: 42 min (major) and 136 min (minor).

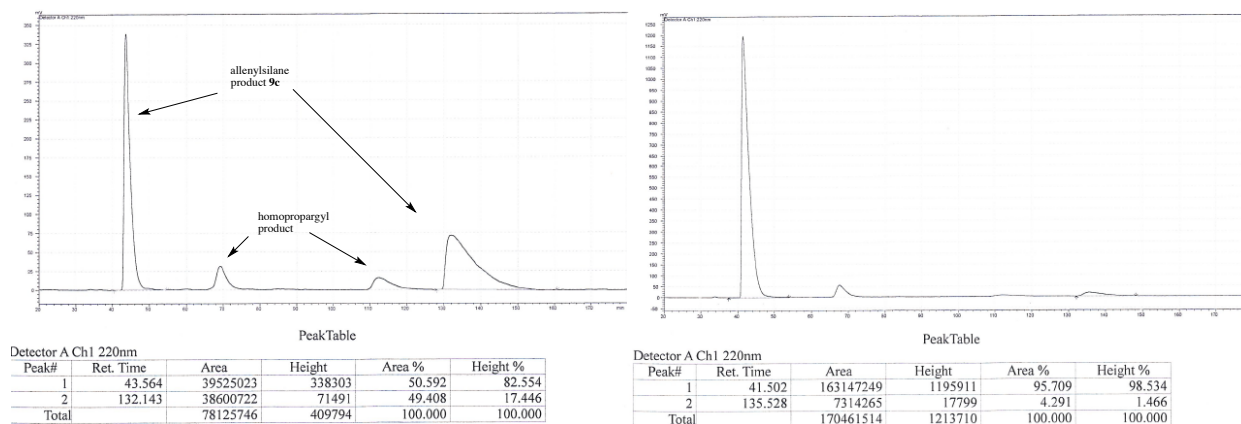

| Retention Time | Area     | Area % | Retention Time | Area      | Area % |
|----------------|----------|--------|----------------|-----------|--------|
| 43.564         | 39525023 | 50.592 | 41.502         | 163147249 | 95.709 |
| 132.143        | 38600722 | 49.408 | 135.528        | 7314265   | 4.291  |

**(*R,E*)-*N*-(2-methyl-1-phenyl-4-(trimethylsilyl)hexa-1,4,5-trien-3-yl)-*P,P*-diphenylphosphinic amide (**10**):** IR (neat): 3346 (w), 3204 (w, br), 3024 (w), 2956 (w), 1927 (m), 1438 (m), 1248 (m), 1199 (m), 1123 (m), 1110 (m), 1076 (m), 840 (s), 752 (m), 724 (m), 697 (s), 541 (m)  $\text{cm}^{-1}$ ;  $^1\text{H}$  NMR (400 MHz,  $\text{CDCl}_3$ ):  $\delta$  7.94–7.85 (4H, m), 7.52–7.37 (7H, m), 7.29–7.27 (1H, m), 7.20–7.16 (1H, m), 7.07–7.05 (2H, m), 6.09 (1H, s), 4.82 (1H, dd,  $J = 10.8, 3.2$  Hz), 4.68 (1H, dd,  $J = 11.2, 2.8$  Hz), 4.31 (1H, tt,  $J = 8.8, 2.8$  Hz), 3.71 (1H, t,  $J = 8.0$  Hz), 1.78 (3H, d,  $J = 1.2$  Hz),  $-0.05$  (9H, s);  $^{13}\text{C}$  NMR (100 MHz,  $\text{CDCl}_3$ ):  $\delta$  207.5, 138.2 (d,  $J = 3.1$  Hz), 137.5, 133.0 (d,  $J = 126.9$  Hz), 132.5 (d,  $J = 9.7$  Hz), 132.1 (d,  $J = 9.8$  Hz), 131.9 (d,  $J = 2.5$  Hz), 131.8 (d,  $J = 2.4$  Hz), 129.0, 128.6 (d,  $J = 12.7$  Hz), 128.4 (d,  $J = 12.3$  Hz), 128.1, 127.9, 126.6, 99.2 (d,  $J = 5.3$  Hz), 74.2, 57.7, 13.2,  $-1.2$ ; HRMS Calcd for  $\text{C}_{28}\text{H}_{33}\text{NOPSi}$   $[\text{M} + \text{H}]^+$ : 458.2069; Found: 458.2064.  $[\alpha]_D^{20} = -74.9$  ( $c = 1.60$ ,  $\text{CHCl}_3$ ) for a 91:9 er sample. The enantiomeric purity of this



compound was determined by HPLC analysis in comparison with authentic racemic material (Chiracel OD–H, 99.5:0.5 hexanes:*i*-PrOH, 0.5 mL/min, 220 nm):  $t_R$  of **10**: 76 min (major) and 104 min (minor).

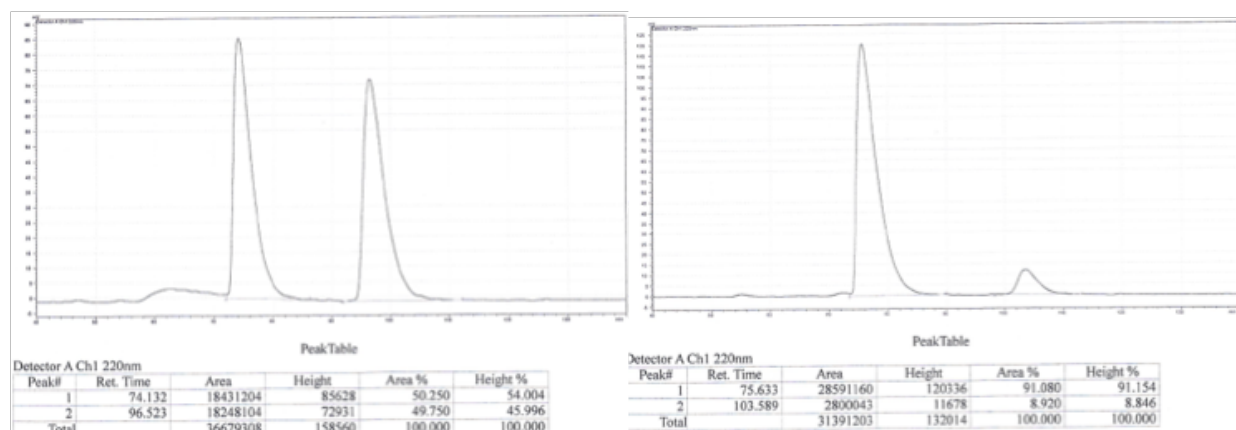

| Retention Time | Area     | Area % | Retention Time | Area     | Area % |
|----------------|----------|--------|----------------|----------|--------|
| 74.132         | 18431204 | 50.250 | 76.633         | 28591160 | 91.080 |
| 96.523         | 18248104 | 49.750 | 103.589        | 2800043  | 8.920  |

#### Scheme S1

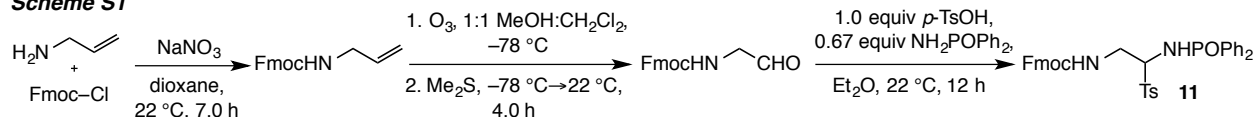

**Procedure for Synthesis of (9*H*-Fluoren-9-yl)methyl (2-((diphenylphosphoryl)amino)-2-tosylethyl)carbamate (**11**; cf. Scheme S1).** To a solution of allylamine (0.65 g, 11.4 mmol) in dioxane (70 mL), placed in a vessel, was added  $\text{NaHCO}_3$  (1.92 g, 22.8 mmol) and Fmoc–Cl (1.97 g, 7.61 mmol) at 0 °C. The mixture was allowed to stir at 22 °C for 7 h until TLC analysis indicated the complete disappearance of Fmoc–Cl. At this point, the resulting solution was diluted by addition of a saturated solution of  $\text{NaHCO}_3$  (50 mL) and washed with EtOAc (50 mL). The organic layer was subsequently washed with a saturated solution of  $\text{NaHCO}_3$ , brine, and water, respectively; the organic layer was dried over  $\text{MgSO}_4$  and the volatiles were removed in vacuo. The resulting yellow solid residue was purified by crystallization from hot ethanol to afford Fmoc–protected allylamine **A** as white solid (1.85 g, 6.62 mmol, 87 % yield). The latter compound (**A**; 0.8 g, 2.86 mmol) was dissolved in  $\text{CH}_2\text{Cl}_2$  (5.0 mL) and MeOH (60 mL) and cooled to –78 °C in a round bottom flask. At –78 °C, ozone was introduced into the mixture until the solution turned blue (~ 5 min), at which time it was purged with  $\text{N}_2$  (~ 10 min);  $\text{Me}_2\text{S}$  (420  $\mu\text{L}$ , 5.72 mmol) was then added in a single portion (at –78 °C). The solution was subsequently allowed to warm to 22 °C (over the course of ~ 1 h) and stir for 4 h at 22 °C. The volatiles were removed in vacuo and the resulting faint yellow solid was purified by silica gel chromatography ( $\text{CH}_2\text{Cl}_2 \rightarrow 20\% \text{EtOAc}:\text{CH}_2\text{Cl}_2$ ) to afford aldehyde **B** as pale yellow solid (640 mg, 2.28 mmol, 80% yield). Aldehyde **B** (260 mg, 0.93 mmol) was placed in a round bottom flask containing *p*-

toluenesulfonic acid (145 mg, 0.93 mmol) and *P,P*-diphenylphosphinic amide (134 mg, 0.62 mmol); Et<sub>2</sub>O was introduced (25 mL) and the solution was allowed to stir for 12 h at 22 °C. The resulting white precipitate was filtered, washed with Et<sub>2</sub>O and dried under reduced pressure to afford **11** as white solid (290 mg, 0.46 mmol, 74% yield). Melting point: 117–120 °C. IR (neat): 3325 (w, br), 3061 (w, br), 1704 (s), 1548 (m), 1477 (w), 1435 (m), 1291 (m), 1263 (s), 1189 (s), 1126 (s), 1083 (m), 1023 (m), 907 (w), 808 (w), 724 (s), 539 (s) cm<sup>-1</sup>; <sup>1</sup>H NMR (400 MHz, CDCl<sub>3</sub>): δ 7.86–7.81 (2H, m), 7.78–7.76 (4H, m), 7.70–7.65 (2H, m), 7.56–7.43 (7H, m), 7.41–7.38 (4H, m), 7.33–7.29 (2H, m), 7.24–7.22 (1H, m), 6.76–6.73 (1H, m), 4.31–4.14 (5H, m), 3.83–3.78 (1H, m), 3.54–3.47 (1H, m), 2.50 (3H, s); <sup>13</sup>C NMR (100 MHz, CDCl<sub>3</sub>): δ 156.9, 145.8, 144.1, 144.0, 141.4, 133.5, 132.8 (d, *J* = 2.1 Hz), 132.5 (d, *J* = 3.0 Hz), 132.4 (d, *J* = 9.9 Hz), 132.0 (d, *J* = 9.9 Hz), 130.2, 129.6, 128.9 (d, *J* = 12.9 Hz), 128.7 (d, *J* = 13.0 Hz), 127.8, 127.2, 125.6, 125.5, 120.0, 71.9, 67.6, 47.2, 41.6, 22.0; HRMS Calcd for C<sub>36</sub>H<sub>33</sub>N<sub>2</sub>O<sub>5</sub>PS [M]<sup>+</sup>: 636.1848; Found: 636.1835.

**Procedure for Synthesis of (9*H*-Fluoren-9-yl)methyl (*R*)-(2-((diphenylphosphoryl)amino)-3-(trimethylsilyl)penta-3,4-dien-1-yl)carbamate (**12**).** To a vial was added sulfinic adduct **11** (200 mg, 0.337 mmol), CH<sub>2</sub>Cl<sub>2</sub> (6 mL) and saturated NaHCO<sub>3</sub> (6 mL). The biphasic mixture was allowed to stir vigorously for 1 h. The layers were separated and the organic layer was filtered through MgSO<sub>4</sub> and the volatiles were removed in vacuo. The unpurified imine was then subjected to the aforementioned conditions for NHC–Cu-catalyzed allenylsilane addition. The resulting yellow oil was purified by silica gel chromatography (hexanes→50% EtOAc:hexanes) to afford homoallenylamide **12** as colorless oil (125 mg, 0.21 mmol, 62.0 % yield). IR (neat): 3259 (m, br), 3056 (m), 2951 (m), 1927 (m), 1718 (s), 1544 (m), 1439 (m), 1249 (s), 1187 (m), 1122 (s), 1110 (m), 757 (s), 741 (s), 726 (s), 697 (s), 668 (m), 555 (m), 525 (m) cm<sup>-1</sup>; <sup>1</sup>H NMR (500 MHz, CDCl<sub>3</sub>): δ 7.93 (4H, dt, *J* = 13.5, 7.0 Hz), 7.76 (2H, d, *J* = 7.5 Hz), 7.73 (2H, t, *J* = 8.5 Hz), 7.54–7.42 (6H, m), 7.39 (2H, t, *J* = 7.5 Hz), 7.33–7.29 (2H, m), 4.79 (1H, dd, *J* = 11.5, 2.5 Hz), 4.64 (1H, dd, *J* = 11.0, 1.0 Hz), 4.34 (1H, dd, *J* = 9.5, 7.0 Hz), 4.28 (1H, t, *J* = 7.5 Hz), 4.20 (1H, dd, *J* = 9.5, 7.5 Hz), 3.64 (1H, ddd, *J* = 13.5, 8.0, 2.0 Hz), 3.53 (1H, q, *J* = 10.5 Hz), 3.42 (1H, t, *J* = 10.5 Hz), 2.92 (1H, ddd, *J* = 12.5, 9.0, 2.5 Hz), –0.09 (9H, s); <sup>13</sup>C NMR (100 MHz, CDCl<sub>3</sub>): δ 208.1, 157.0, 144.4, 144.3, 141.4, 141.4, 132.9 (d, *J* = 9.7 Hz), 132.8 (d, *J* = 9.3 Hz), 132.8 (d, *J* = 128.6 Hz), 132.3 (d, *J* = 2.9 Hz), 132.3 (d, *J* = 2.7 Hz), 131.1 (d, *J* = 128.4 Hz, only the peak at 130.5 is visible, the other is overlapping), 128.8 (d, *J* = 12.7 Hz), 128.8 (d, *J* = 12.7 Hz), 127.7, 127.2, 125.8, 125.7, 120.0, 120.0, 98.3 (d, *J* = 7.1 Hz), 73.9, 67.2, 57.8, 48.8, 47.4, –1.2; HRMS Calcd for C<sub>35</sub>H<sub>38</sub>N<sub>2</sub>O<sub>3</sub>PSi [M + H]<sup>+</sup>: 593.2389; Found: 593.2377. [α]<sub>D</sub><sup>20</sup> = +39.6 (*c* = 1.26, CHCl<sub>3</sub>) for a 97:3 er sample. The enantiomeric purity of this compound was determined by HPLC analysis in comparison with authentic racemic material (Chiracel OD–H, 96:4 hexanes:*i*-PrOH, 0.8 mL/min, 220 nm): *t*<sub>R</sub> of **12**: 46 min (minor) and 60 min (major).

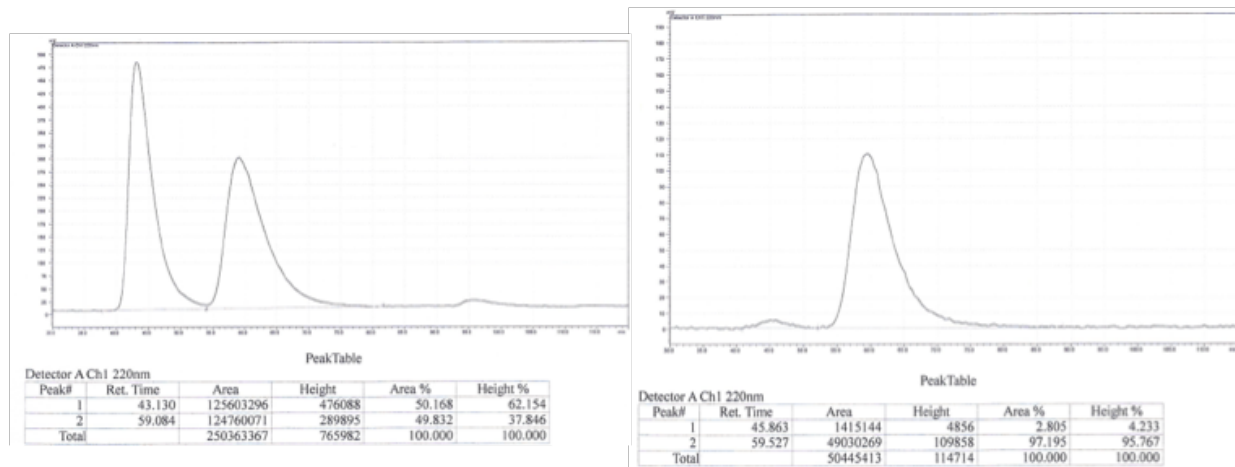

| Retention Time | Area      | Area % | Retention Time | Area     | Area % |
|----------------|-----------|--------|----------------|----------|--------|
| 43.130         | 125603296 | 50.168 | 45.863         | 1415144  | 2.805  |
| 59.084         | 124760071 | 49.832 | 59.527         | 49030269 | 97.195 |

Scheme S2

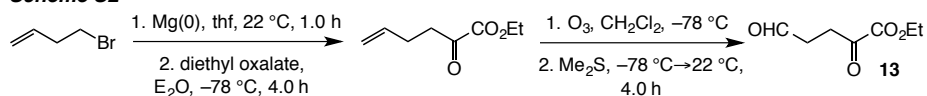

**Procedure for Synthesis of ethyl 2,5-dioxopentanoate (13; cf. Scheme S2).** To a flame-dried 100 mL round bottom flask equipped with a reflux condenser was added magnesium turnings (1.25 g, 51.6 mmol) and thf (35 mL) under N<sub>2</sub> atm. 4-Bromo-1-butene (2.25 mL, 22.1 mmol) was added (CAUTION: EXOTHERM!) and the resulting brown heterogeneous solution was allowed to stir for 1 h (leading to the formation of the Grignard reagent). To a separate 250 mL round bottom flask with a stir bar was added diethyl oxalate (2.5 mL, 18.5 mmol), thf (20 mL) and Et<sub>2</sub>O (40 mL) and the mixture was allowed to cool to  $-78$  °C. The solution of the Grignard reagent was added drop-wise to the flask containing diethyl oxalate and the mixture was allowed to stir for 4 h at  $-78$  °C. The reaction was quenched by the addition of a saturated solution of NH<sub>4</sub>Cl (20 mL) and the mixture was diluted by the addition of water (50 mL). The organic layer was separated, washed with water, dried over MgSO<sub>4</sub> and the volatiles were removed in vacuo, affording a yellow oil which was purified by silica gel chromatography (hexanes→10% Et<sub>2</sub>O:hexanes) to afford ethyl 2-oxohex-5-enoate as yellow oil (1.85 g, 11.9 mmol, 64% yield). The <sup>1</sup>H NMR spectrum matched that reported previously.<sup>vii</sup> <sup>1</sup>H NMR (400 MHz, CDCl<sub>3</sub>): δ 5.82 (1H, ddt, *J* = 16.8, 10.0, 6.4 Hz), 5.10–5.00 (2H, m), 4.32 (2H, q, *J* = 6.8 Hz), 2.95 (2H, t, *J* = 7.2 Hz), 2.42–2.36 (2H, m), 1.37 (3H, t, *J* = 7.2 Hz). A sample of ethyl 2-oxohex-5-enoate thus prepared (0.95 g, 6.0 mmol) was added to a 100 mL round bottom flask containing CH<sub>2</sub>Cl<sub>2</sub> (50 mL) and the resulting solution was allowed to cool to  $-78$  °C. Ozone was introduced into the mixture until the solution turned blue (~ 5 min). N<sub>2</sub> was next introduced until the blue color disappeared (~ 10 min) after which the mixture was charged with Me<sub>2</sub>S (670 μL, 9.1 mmol) in a single portion at  $-78$  °C. The solution was allowed to warm slowly to 22 °C (over the course of ~ 1 h) and stir for 12 h at 22 °C. The volatiles were removed in vacuo, affording orange oil,

Kugelrohr distillation of which delivered 2,5-dioxopentanoate **13** as light yellow oil (340 mg, 2.15 mmol, 36 % yield). IR (neat): 2985 (w), 2912 (w), 2845 (w), 1721 (s), 1391 (m), 1255 (m), 1087 (m), 1042 (s), 1016 (m), 644 (w)  $\text{cm}^{-1}$ ;  $^1\text{H}$  NMR (400 MHz,  $\text{CDCl}_3$ ):  $\delta$  9.79 (1H, s), 4.32 (2H, q,  $J = 7.2$  Hz), 3.13 (2H, t,  $J = 6.4$  Hz), 2.85 (2H, t,  $J = 6.8$  Hz), 1.36 (3H, t,  $J = 7.2$  Hz);  $^{13}\text{C}$  NMR (100 MHz,  $\text{CDCl}_3$ ):  $\delta$  199.4, 192.5, 160.6, 62.8, 37.2, 31.7, 14.1; HRMS Calcd for  $\text{C}_7\text{H}_{11}\text{O}_4$   $[\text{M} + \text{H}]^+$ : 159.0657; Found: 159.0650.

**Procedure for Synthesis of Ethyl (R)-1-(1-(((9H-fluoren-9-yl)methoxy)carbonyl)amino)-3-(trimethylsilyl)penta-3,4-dien-2-yl)-1H-pyrrole-2-carboxylate (14).** To a vial containing **12** (52 mg, 0.088 mmol) was added MeOH (3 mL), a 3.0 M aqueous solution of HCl (1.0 mL), and the solution was allowed to stir at 22 °C for 24 h. The solvent was then removed in vacuo and the resulting yellow oil was purified by silica gel chromatography ( $\text{CH}_2\text{Cl}_2 \rightarrow 10\%$  MeOH: $\text{CH}_2\text{Cl}_2$ ) to provide the desired amine as pale yellow solid. To the amine was added 2,5-dioxopentanoate (**13**; 42 mg, 0.263 mmol) followed by toluene (0.9 mL) and a 3.0 M solution of HCl (0.1 mL). The resulting biphasic solution was allowed to stir vigorously at 90 °C for 1 h. The red solution was subsequently diluted by addition of water (1.0 mL) and then  $\text{Et}_2\text{O}$  (2.0 mL). The layers were separated and the aqueous layer was washed with  $\text{Et}_2\text{O}$  (2x1 mL). The combined organic layers were dried over  $\text{MgSO}_4$  and the volatiles were removed to give brown oil, which was purified by medium pressure liquid chromatography (MPLC) (hexanes  $\rightarrow$  20%  $\text{Et}_2\text{O}$ :hexanes) to afford pyrrole **14** as colorless oil (23 mg, 0.045 mmol, 51% yield). IR (neat): 3347 (w, br), 2955 (w), 1928 (m), 1700 (s), 1526 (m), 1450 (m), 1417 (m), 1368 (m), 1249 (m), 1227 (s), 1103 (s), 1073 (m), 842 (s), 758 (m), 739 (s)  $\text{cm}^{-1}$ ;  $^1\text{H}$  NMR (400 MHz,  $\text{CDCl}_3$ ):  $\delta$  7.45 (2H, d,  $J = 7.6$  Hz), 7.51 (2H, d,  $J = 7.2$  Hz), 7.39 (2H, t,  $J = 7.6$  Hz), 7.31–7.27 (2H, m), 7.05 (1H, t,  $J = 2.4$  Hz), 6.96 (1H, dd,  $J = 4.0, 1.6$  Hz), 6.17 (1H, t,  $J = 3.6$  Hz), 6.08–6.04 (1H, m), 5.14 (1H, t,  $J = 6.0$  Hz), 4.73–4.67 (2H, m), 4.29–4.13 (5H, m), 3.74–3.67 (2H, m), 1.30 (3H, t,  $J = 7.2$  Hz), –0.05 (9H, s);  $^{13}\text{C}$  NMR (100 MHz,  $\text{CDCl}_3$ ):  $\delta$  209.3, 160.1, 156.2, 144.2, 144.2, 141.4, 127.7, 127.1, 126.5, 125.4, 125.3, 122.8, 120.0, 118.6, 109.1, 95.4, 72.5, 67.0, 60.2, 53.7, 47.3, 46.8, 14.5, –1.8; HRMS Calcd for  $\text{C}_{30}\text{H}_{35}\text{N}_2\text{O}_4\text{Si}$   $[\text{M} + \text{H}]^+$ : 515.2366; Found: 515.2349.  $[\alpha]_{\text{D}}^{20} = +73.8$  ( $c = 1.49$ ,  $\text{CHCl}_3$ ) for a 97:3 er sample.

**Procedure for Synthesis of Ethyl (S)-1-(1-(((9H-fluoren-9-yl)methoxy)carbonyl)amino)-5-bromopent-3-yn-2-yl)-4,5-dibromo-1H-pyrrole-2-carboxylate (15).** To a vial containing pyrrole **14** (17 mg, 0.033 mmol) was added acetic acid (1.0 mL). Bromine (5.1  $\mu\text{L}$ , 0.1 mmol) was introduced in a drop-wise manner and the resulting yellowish orange solution was allowed to stir for 1 h at 22 °C. A saturated solution of sodium thiosulfate was subsequently introduced in a drop-wise manner until the solution turned colorless. The mixture was diluted with water (1.0 mL) and washed with  $\text{Et}_2\text{O}$  (3x1.0 mL). After separation from the aqueous phase, the organic layer was dried over  $\text{MgSO}_4$ , concentrated in vacuo and excess acetic acid was removed through azeotropic removal with heptane in vacuo. The resulting yellow oil was purified by silica gel chromatography (hexanes  $\rightarrow$  25 % EtOAc:hexanes) followed by trituration with hexanes to afford dibromopyrrole **15** as white solid (14.1 mg, 0.021 mmol, 63 % yield). Melting point = 138–140 °C. IR (neat): 3324 (w, br), 2954 (w), 2926 (m), 1707 (s), 1522 (m),

1449 (m), 1410 (m), 1330 (m), 1255 (m), 1211 (s), 1094 (m), 758 (m), 741 (m)  $\text{cm}^{-1}$ ;  $^1\text{H}$  NMR (400 MHz,  $\text{CDCl}_3$ ):  $\delta$  7.76 (2H, d,  $J = 7.6$  Hz), 7.59–7.51 (2H, m), 7.40 (2H, t,  $J = 7.2$  Hz), 7.33–7.28 (2H, m), 7.06 (1H, s), 5.04 (1H, t,  $J = 6.8$  Hz), 4.41–4.17 (6H, m), 4.06–3.98 (1H, m), 3.94–3.92 (2H, m), 3.89–3.82 (1H, m), 1.27 (3H, br t,  $J = 6.8$  Hz);  $^{13}\text{C}$  NMR (100 MHz,  $\text{CDCl}_3$ ):  $\delta$  159.8, 156.2, 144.0, 143.9, 141.4, 127.8, 127.2, 125.2, 125.2, 124.6, 120.8, 120.1, 112.2, 101.9, 82.5, 81.0, 67.2, 61.1, 47.3, 45.4, 44.5, 14.3, 13.9; HRMS Calcd for  $\text{C}_{27}\text{H}_{24}\text{Br}_3\text{N}_2\text{O}_4$   $[\text{M} + \text{H}]^+$ : 676.9286; Found: 676.9306.  $[\alpha]_{\text{D}}^{20} = +2.8$  ( $c = 1.65$ ,  $\text{CHCl}_3$ ) for a 97:3 er sample.

**Procedure for Synthesis of *bis*-Boc-2-(3-(6,7-dibromo-1-oxo-1,2,3,4-tetrahydropyrrolo[1,2-*a*]pyrazin-4-yl)prop-2-yn-1-yl)guanidine (17).** To a vial containing dibromopyrrole **15** (13.0 mg, 0.019 mmol) were added  $\text{K}_2\text{CO}_3$  (10.5 mg, 0.076 mmol) and *bis*-Boc-guanidine **16** (14.9 mg, 0.057 mmol). Dimethylformamide (0.5 mL) was then added and the resulting yellow solution was allowed to stir for 8 h at 22 °C. At this point, the mixture was diluted with water (1.0 mL) and washed with  $\text{Et}_2\text{O}$  (3x1 mL). The combined organic layers were dried over  $\text{MgSO}_4$  and the volatiles were removed in vacuo, affording yellow oil which was purified by MPLC (hexanes→50%  $\text{EtOAc}$ :hexanes) to afford protected guanidine **17** as white solid (7 mg, 0.012 mmol, 62% yield). Melting point = 78–81 °C. IR (neat): 3379 (w), 2980 (w), 2926 (w), 1721 (m), 1672 (m), 1611 (m), 1550 (w), 1509 (w), 1466 (w), 1384 (m), 1368 (m), 1290 (s), 1242 (s), 1143 (s), 1089 (m), 749 (w)  $\text{cm}^{-1}$ ;  $^1\text{H}$  NMR (400 MHz,  $\text{CDCl}_3$ ):  $\delta$  9.39–9.31 (1H, br s), 9.21–9.13 (1H, br s), 7.02 (1H, s), 5.07 (1H, app d,  $J = 2.0$  Hz), 4.81 (1H, d,  $J = 17.2$  Hz), 4.66 (1H, d,  $J = 17.2$  Hz), 3.96 (1H, dd,  $J = 12.8, 4.0$  Hz), 3.68 (1H, ddd,  $J = 11.6, 4.4, 0.8$  Hz), 1.50 (9H, s), 1.39 (9H, s);  $^{13}\text{C}$  NMR (100 MHz,  $\text{CDCl}_3$ ):  $\delta$  159.8, 158.2, 154.1, 125.2, 116.9, 107.3, 101.7, 85.1, 82.5, 79.4, 46.0, 45.6, 34.4, 29.9, 28.5, 28.0; HRMS Calcd for  $\text{C}_{21}\text{H}_{28}^{79}\text{Br}^{81}\text{Br}_1\text{N}_5\text{O}_5$   $[\text{M} + \text{H}]^+$ : 590.0437; Found: 590.0458.  $[\alpha]_{\text{D}}^{20} = +18.6$  ( $c = 0.48$ ,  $\text{CHCl}_3$ ) for a 97:3 er sample.

**Procedure for Synthesis of *S*(–)-Cyclooroidin:** To a vial containing protected guanidine **17** (9.0 mg, 0.015 mmol) was added  $\text{AgOAc}$  (0.3 mg, 0.002 mmol) followed by acetonitrile (1.0 mL). The resulting heterogeneous mixture was allowed to stir for 1 h at 22 °C, after which it was filtered through a bed of celite. The volatiles were removed in vacuo to furnish colorless oil to which was added a solution of trifluoroacetic acid (1.0 mL) in  $\text{CH}_2\text{Cl}_2$  (1.0 mL). The mixture was allowed to stir for 1 h at 22 °C. Removal of the volatiles afforded orange oil, which was purified by silica gel chromatography (80:15:5  $\text{CH}_2\text{Cl}_2$ : $\text{MeOH}$ : $\text{NH}_4\text{OH}$ ) to afford the target molecule as pale yellow oil (5.4 mg, 0.014 mmol, 90% yield). Spectroscopic data for the synthetic material were in agreement with those reported previously.<sup>viii</sup> IR (neat): 3218 (br, m), 2923 (br, w), 1649 (s), 1571 (w), 1550 (m), 1465 (m), 1428 (m), 1337 (m), 1202 (w), 1121 (w), 749 (w)  $\text{cm}^{-1}$ ;  $^1\text{H}$  NMR (400 MHz,  $\text{CD}_3\text{OD}$ ):  $\delta$  6.94 (1H, s), 6.30 (1H, s), 4.62–4.57 (1H, m), 3.78 (1H, dd,  $J = 13.6, 4.4$  Hz), 3.55 (1H, dd,  $J = 13.6, 1.2$  Hz), 2.81 (2H, d,  $J = 7.6$  Hz);  $^{13}\text{C}$  NMR (100 MHz,  $\text{CD}_3\text{OD}$ ):  $\delta$  161.0, 151.1, 129.7, 125.8, 116.5, 112.4, 108.7, 101.2, 55.4, 43.3, 30.9; HRMS Calcd for  $\text{C}_{11}\text{H}_{12}\text{Br}_2\text{N}_5\text{O}$   $[\text{M} + \text{H}]^+$ : 387.9403; Found: 387.9409.  $[\alpha]_{\text{D}}^{20} = -11.6$  ( $c = 0.25$ ,  $\text{CH}_3\text{OH}$ ) for a 97:3 er sample. Previously reported optical rotation values for *S*(–)-Cyclooroidin<sup>8b</sup>:  $[\alpha]_{\text{D}}^{25} = -12.5$  ( $c = 0.02$ ,  $\text{CH}_3\text{OH}$ ),  $[\alpha]_{\text{D}}^{25} = -33.0$  ( $c = 1$ ,  $\text{CH}_3\text{OH}$ ). Previously reported optical rotation

value for *R*-(+)-Cyclooroidin<sup>8a</sup>:  $[\alpha]_D = +10.6$  ( $c = 0.02$ , CH<sub>3</sub>OH).

### **Computational Details**

Geometries of the imine substrate, NHC–Cu compounds **1-6**, **A-C**, and transition states leading to imine addition **7-14** were optimized using the B3LYP/LANL2DZ method. Frequency calculations were carried out at the same level of theory. The computed frequencies of all geometries are real-valued, except for the transition state geometries, which are all real-valued but one, which is imaginary. The reported Gibbs free energies were computed at 298K and 1 atm. using the computed unscaled normal mode frequencies. **1-6** were also computed without solvent corrections as in a previous study.<sup>ix</sup> The calculations were carried out with the

Gaussian09 program.<sup>x</sup> Tetrahydrofuran solvation effects using the PCM method were included in calculations for structures **A-C** and **7-14**. Computed free energies (in kcal/mol) are presented in Tables **S1** through **S4**. The relative Gibbs free energies of the reaction are also depicted in Figure **S1** through **S3**.

The optimized structure for benzaldehyde-derived phosphinoylimine substrate

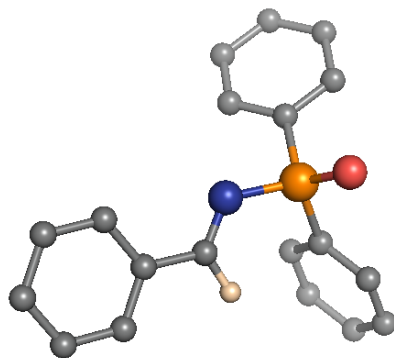

-----  
 Cartesian coordinates (Angstroms):  
 -----

|   |       |        |        |
|---|-------|--------|--------|
| H | 4.363 | 2.402  | -5.981 |
| H | 3.676 | 3.767  | -4.007 |
| C | 4.291 | 1.939  | -5.000 |
| C | 3.903 | 2.711  | -3.882 |
| H | 4.880 | -0.025 | -5.707 |
| C | 4.583 | 0.569  | -4.846 |
| C | 3.807 | 2.117  | -2.615 |
| C | 4.488 | -0.029 | -3.577 |
| H | 3.507 | 2.694  | -1.745 |
| C | 4.100 | 0.740  | -2.454 |
| H | 4.710 | -1.088 | -3.455 |
| C | 4.008 | 0.083  | -1.138 |
| H | 5.375 | 2.198  | 1.206  |
| N | 3.687 | 0.730  | -0.056 |
| H | 4.238 | -0.993 | -1.139 |
| H | 6.341 | 3.807  | 2.847  |
| C | 5.100 | 2.136  | 2.254  |
| C | 5.637 | 3.049  | 3.182  |
| P | 3.460 | -0.084 | 1.518  |
| C | 4.186 | 1.157  | 2.690  |
| C | 5.258 | 2.987  | 4.537  |
| C | 4.519 | -1.623 | 1.557  |
| H | 6.439 | -0.594 | 1.527  |
| C | 5.928 | -1.554 | 1.546  |
| C | 3.868 | -2.872 | 1.595  |
| C | 3.798 | 1.095  | 4.044  |

```

C    4.336    2.011    4.967
C    6.685   -2.740    1.574
C    4.629   -4.057    1.624
H    7.771   -2.689    1.569
H    3.079    0.349    4.374
H    4.036    1.966    6.011
O    1.917   -0.441    1.825
H    6.623   -4.906    1.636
C    6.036   -3.992    1.612
H    4.128   -5.021    1.656
H    2.782   -2.909    1.612
H    5.672    3.695    5.251

```

```

          1          2          3
          A          A          A
Frequencies --   14.1037   25.4733   31.8527
Red. masses --    3.8016    3.8025    4.3370
Zero-point correction=
Thermal correction to Energy=
Thermal correction to Enthalpy=
Thermal correction to Gibbs Free Energy=
Sum of electronic and zero-point Energies=
Sum of electronic and thermal Energies=
Sum of electronic and thermal Enthalpies=
Sum of electronic and thermal Free Energies=

```

```

Item          Value      Threshold  Converged?
Maximum Force 0.000003   0.000450   YES
RMS Force     0.000000   0.000300   YES

```

SCF= -869.975378370 Hartree

Optimized structure for NHC–Cu–silyllallene complex **1** without solvent correction

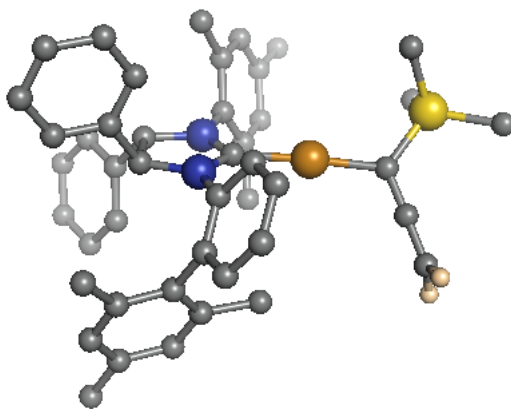

-----  
Cartesian coordinates (Angstroms):  
-----

```

C    -1.109    1.778    0.801
N     0.272    1.301    0.404
C    -1.860    0.423    1.069
C     0.397   -0.052    0.389
N    -0.806   -0.599    0.737
C    -1.982   -2.687    0.027
C    -2.152   -4.079    0.209
C    -1.030   -2.023    0.843
C    -1.389   -4.802    1.141
C    -0.258   -2.749    1.773

```



|   |        |        |        |
|---|--------|--------|--------|
| C | -0.427 | -4.134 | 1.920  |
| C | 1.532  | 2.616  | 2.699  |
| C | 1.957  | 2.890  | 1.267  |
| C | 2.997  | 3.809  | 1.021  |
| C | 1.361  | 2.227  | 0.165  |
| C | 3.465  | 4.070  | -0.281 |
| C | 4.604  | 5.043  | -0.526 |
| C | 1.823  | 2.453  | -1.157 |
| C | 2.866  | 3.377  | -1.352 |
| C | 1.262  | 1.699  | -2.346 |
| C | -4.879 | -2.081 | 0.369  |
| C | -4.845 | -1.116 | -1.967 |
| C | -4.138 | -1.720 | -0.909 |
| C | -5.016 | -0.181 | -4.330 |
| C | -4.225 | -0.810 | -3.196 |
| C | -2.754 | -2.005 | -1.069 |
| C | -2.863 | -1.132 | -3.347 |
| C | -2.115 | -1.732 | -2.310 |
| C | -0.667 | -2.115 | -2.560 |
| C | -2.433 | 4.962  | -0.876 |
| C | -1.835 | 4.081  | 0.044  |
| C | -1.764 | 2.698  | -0.222 |
| C | -2.972 | 4.464  | -2.077 |
| C | -2.905 | 3.084  | -2.350 |
| C | -2.304 | 2.207  | -1.431 |
| C | -4.260 | 0.581  | 4.056  |
| C | -3.756 | 0.580  | 2.742  |
| C | -2.391 | 0.327  | 2.495  |
| C | -3.402 | 0.318  | 5.141  |
| C | -2.038 | 0.060  | 4.901  |
| C | -1.537 | 0.067  | 3.588  |
| H | -1.017 | 2.333  | 1.740  |
| H | -2.697 | 0.315  | 0.375  |
| H | -2.873 | -4.598 | -0.418 |
| H | -1.532 | -5.874 | 1.246  |
| H | 0.479  | -2.223 | 2.372  |
| H | 0.186  | -4.681 | 2.631  |
| H | 2.315  | 2.932  | 3.397  |
| H | 1.343  | 1.549  | 2.864  |
| H | 0.616  | 3.158  | 2.974  |
| H | 3.460  | 4.316  | 1.866  |
| H | 4.816  | 5.646  | 0.364  |
| H | 4.374  | 5.726  | -1.353 |
| H | 5.525  | 4.507  | -0.793 |
| H | 3.226  | 3.552  | -2.365 |
| H | 1.644  | 0.668  | -2.364 |
| H | 1.559  | 2.180  | -3.284 |
| H | 0.170  | 1.644  | -2.319 |
| H | -4.315 | -1.814 | 1.269  |
| H | -5.064 | -3.162 | 0.425  |
| H | -5.852 | -1.578 | 0.411  |
| H | -5.902 | -0.889 | -1.833 |
| H | -4.356 | 0.171  | -5.131 |
| H | -5.612 | 0.672  | -3.979 |
| H | -5.716 | -0.904 | -4.772 |
| H | -2.370 | -0.928 | -4.296 |
| H | -0.491 | -3.181 | -2.370 |
| H | 0.030  | -1.572 | -1.910 |
| H | -0.380 | -1.908 | -3.597 |
| H | -2.480 | 6.025  | -0.656 |
| H | -1.420 | 4.471  | 0.971  |
| H | -3.438 | 5.142  | -2.789 |
| H | -3.318 | 2.690  | -3.275 |
| H | -2.263 | 1.146  | -1.666 |
| H | -5.314 | 0.781  | 4.232  |

|    |        |        |        |
|----|--------|--------|--------|
| H  | -4.424 | 0.786  | 1.908  |
| H  | -3.790 | 0.312  | 6.156  |
| H  | -1.370 | -0.150 | 5.733  |
| H  | -0.482 | -0.135 | 3.415  |
| Cu | 2.001  | -1.040 | -0.104 |
| Si | 5.259  | -1.619 | 0.003  |
| C  | 3.559  | -2.043 | -0.682 |
| C  | 3.348  | -3.003 | -1.556 |
| C  | 3.119  | -3.975 | -2.452 |
| H  | 3.166  | -3.783 | -3.523 |
| H  | 2.888  | -4.992 | -2.141 |
| C  | 6.572  | -2.923 | -0.445 |
| C  | 5.148  | -1.483 | 1.902  |
| C  | 5.815  | 0.073  | -0.676 |
| H  | 4.801  | -2.429 | 2.341  |
| H  | 4.437  | -0.697 | 2.192  |
| H  | 6.124  | -1.239 | 2.346  |
| H  | 6.328  | -3.896 | 0.003  |
| H  | 7.570  | -2.625 | -0.091 |
| H  | 6.623  | -3.067 | -1.532 |
| H  | 5.929  | 0.034  | -1.768 |
| H  | 6.778  | 0.380  | -0.242 |
| H  | 5.073  | 0.850  | -0.446 |

|                                              |         |         |                             |
|----------------------------------------------|---------|---------|-----------------------------|
|                                              | 1       | 2       | 3                           |
|                                              | A       | A       | A                           |
| Frequencies --                               | 11.0232 | 13.7876 | 17.2469                     |
| Red. masses --                               | 3.2903  | 4.6453  | 4.1172                      |
| Zero-point correction=                       |         |         | 0.819088 (Hartree/Particle) |
| Thermal correction to Energy=                |         |         | 0.870946                    |
| Thermal correction to Enthalpy=              |         |         | 0.871890                    |
| Thermal correction to Gibbs Free Energy=     |         |         | 0.725721                    |
| Sum of electronic and zero-point Energies=   |         |         | -2052.769835                |
| Sum of electronic and thermal Energies=      |         |         | -2052.717977                |
| Sum of electronic and thermal Enthalpies=    |         |         | -2052.717033                |
| Sum of electronic and thermal Free Energies= |         |         | -2052.863201                |

| Item          | Value    | Threshold | Converged? |
|---------------|----------|-----------|------------|
| Maximum Force | 0.000323 | 0.000450  | YES        |
| RMS Force     | 0.000053 | 0.000300  | YES        |

SCF= -2053.58892270 Hartree

Transition state for isomerization of NHC–Cu–silyllallene to NHC–Cu–silylpropargyl complex **2** without solvent correction

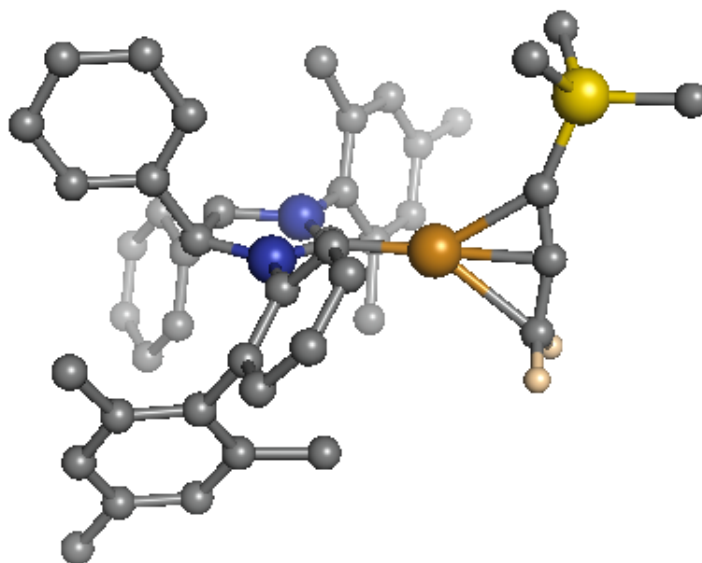

-----  
 Cartesian coordinates (Angstroms):  
 -----

|    |        |        |        |
|----|--------|--------|--------|
| H  | 6.369  | 0.473  | 0.348  |
| H  | 2.910  | 0.026  | -3.930 |
| H  | 7.333  | -1.763 | -1.650 |
| C  | 5.978  | -0.311 | 1.009  |
| H  | 6.760  | -0.566 | 1.737  |
| H  | 5.123  | 0.110  | 1.555  |
| C  | 2.759  | -0.899 | -3.377 |
| C  | 6.951  | -2.513 | -0.946 |
| C  | 3.590  | -1.198 | -2.297 |
| Si | 5.445  | -1.838 | 0.007  |
| H  | 7.768  | -2.788 | -0.263 |
| C  | 4.066  | -1.362 | -1.119 |
| H  | 2.262  | -1.707 | -3.912 |
| H  | 6.678  | -3.405 | -1.525 |
| C  | 4.831  | -3.181 | 1.209  |
| H  | 5.631  | -3.494 | 1.894  |
| H  | 3.992  | -2.809 | 1.813  |
| H  | 4.486  | -4.069 | 0.662  |
| C  | -0.944 | 1.401  | 1.187  |
| N  | 0.285  | 1.252  | 0.323  |
| C  | -1.546 | -0.051 | 1.157  |
| C  | 0.462  | -0.008 | -0.168 |
| N  | -0.597 | -0.777 | 0.246  |
| C  | -1.892 | -2.696 | -0.704 |
| C  | -1.939 | -4.084 | -0.969 |
| C  | -0.728 | -2.178 | -0.077 |
| C  | -0.866 | -4.935 | -0.660 |
| C  | 0.353  | -3.032 | 0.228  |
| C  | 0.294  | -4.402 | -0.068 |
| C  | 2.123  | 1.849  | 2.520  |
| C  | 2.112  | 2.647  | 1.229  |
| C  | 3.018  | 3.715  | 1.068  |
| C  | 1.240  | 2.328  | 0.159  |
| C  | 3.090  | 4.452  | -0.129 |
| C  | 4.095  | 5.577  | -0.296 |
| C  | 1.302  | 3.038  | -1.068 |
| C  | 2.228  | 4.093  | -1.184 |
| C  | 0.430  | 2.669  | -2.252 |

|    |        |        |        |
|----|--------|--------|--------|
| C  | -4.515 | -2.768 | 0.711  |
| C  | -5.360 | -1.100 | -0.989 |
| C  | -4.291 | -1.880 | -0.502 |
| C  | -6.388 | 0.552  | -2.631 |
| C  | -5.229 | -0.296 | -2.139 |
| C  | -3.037 | -1.841 | -1.173 |
| C  | -3.993 | -0.303 | -2.813 |
| C  | -2.895 | -1.064 | -2.356 |
| C  | -1.610 | -1.078 | -3.165 |
| C  | -2.758 | 4.778  | 1.100  |
| C  | -1.907 | 3.722  | 1.475  |
| C  | -1.888 | 2.514  | 0.747  |
| C  | -3.609 | 4.634  | -0.012 |
| C  | -3.599 | 3.429  | -0.742 |
| C  | -2.744 | 2.379  | -0.368 |
| C  | -2.992 | -1.108 | 4.549  |
| C  | -2.885 | -0.636 | 3.227  |
| C  | -1.647 | -0.656 | 2.554  |
| C  | -1.858 | -1.617 | 5.209  |
| C  | -0.618 | -1.646 | 4.540  |
| C  | -0.514 | -1.166 | 3.224  |
| H  | -0.614 | 1.631  | 2.206  |
| H  | -2.543 | -0.035 | 0.709  |
| H  | -2.823 | -4.487 | -1.457 |
| H  | -0.928 | -5.996 | -0.891 |
| H  | 1.242  | -2.613 | 0.687  |
| H  | 1.141  | -5.041 | 0.166  |
| H  | 3.037  | 2.050  | 3.089  |
| H  | 2.080  | 0.772  | 2.318  |
| H  | 1.273  | 2.095  | 3.173  |
| H  | 3.692  | 3.960  | 1.887  |
| H  | 4.450  | 5.946  | 0.673  |
| H  | 3.663  | 6.423  | -0.845 |
| H  | 4.975  | 5.237  | -0.862 |
| H  | 2.278  | 4.642  | -2.123 |
| H  | 0.728  | 1.694  | -2.663 |
| H  | 0.523  | 3.416  | -3.047 |
| H  | -0.625 | 2.597  | -1.969 |
| H  | -3.686 | -2.716 | 1.425  |
| H  | -4.611 | -3.823 | 0.418  |
| H  | -5.437 | -2.488 | 1.236  |
| H  | -6.314 | -1.129 | -0.465 |
| H  | -6.222 | 0.902  | -3.657 |
| H  | -6.529 | 1.438  | -1.995 |
| H  | -7.331 | -0.010 | -2.615 |
| H  | -3.880 | 0.282  | -3.725 |
| H  | -1.343 | -2.100 | -3.465 |
| H  | -0.752 | -0.687 | -2.605 |
| H  | -1.716 | -0.476 | -4.074 |
| H  | -2.759 | 5.703  | 1.672  |
| H  | -1.253 | 3.840  | 2.337  |
| H  | -4.271 | 5.446  | -0.304 |
| H  | -4.253 | 3.308  | -1.603 |
| H  | -2.754 | 1.459  | -0.948 |
| H  | -3.953 | -1.085 | 5.056  |
| H  | -3.766 | -0.246 | 2.720  |
| H  | -1.939 | -1.989 | 6.228  |
| H  | 0.261  | -2.043 | 5.042  |
| H  | 0.447  | -1.195 | 2.716  |
| Cu | 1.970  | -0.583 | -1.194 |

|                | 1        | 2       | 3       |
|----------------|----------|---------|---------|
|                | A        | A       | A       |
| Frequencies -- | -89.7420 | 14.0023 | 14.3967 |
| Red. masses -- | 13.0684  | 4.8359  | 4.7105  |

```

Zero-point correction=          0.818202 (Hartree/Particle)
Thermal correction to Energy=   0.869595
Thermal correction to Enthalpy= 0.870540
Thermal correction to Gibbs Free Energy= 0.725993
Sum of electronic and zero-point Energies= -2052.752262
Sum of electronic and thermal Energies= -2052.700868
Sum of electronic and thermal Enthalpies= -2052.699924
Sum of electronic and thermal Free Energies= -2052.844470

```

| Item          | Value    | Threshold | Converged? |
|---------------|----------|-----------|------------|
| Maximum Force | 0.000004 | 0.000450  | YES        |
| RMS Force     | 0.000000 | 0.000300  | YES        |

SCF= -2053.57046384 Hartree

Optimized structure for NHC–Cu–silylpropargyl complex **3** without solvent correction

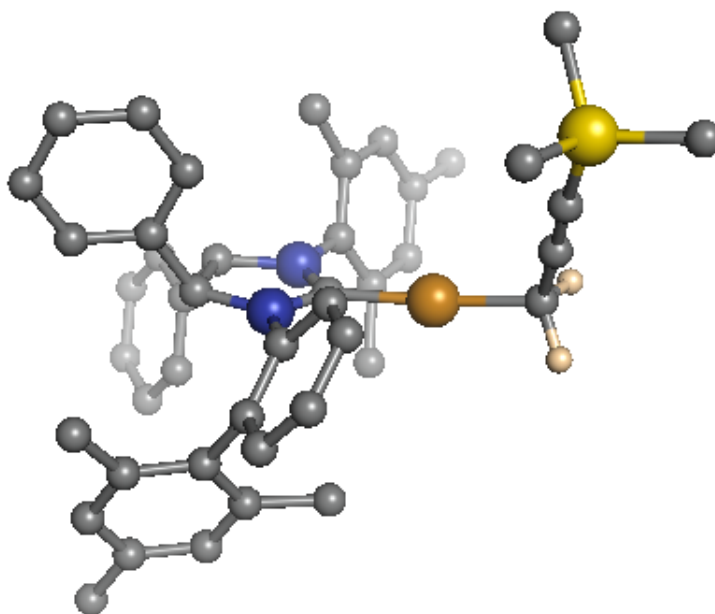

-----  
Cartesian coordinates (Angstroms):  
-----

|    |        |        |        |
|----|--------|--------|--------|
| H  | 6.245  | -3.099 | -0.426 |
| H  | 5.511  | -2.570 | 1.105  |
| H  | 7.250  | -2.927 | 1.030  |
| C  | 6.407  | -2.492 | 0.474  |
| Si | 6.755  | -0.677 | 0.009  |
| H  | 8.267  | -1.195 | -1.929 |
| H  | 6.095  | 0.280  | 2.238  |
| H  | 9.213  | -1.014 | -0.432 |
| H  | 7.844  | -0.044 | 2.190  |
| C  | 8.365  | -0.611 | -1.004 |
| C  | 6.991  | 0.332  | 1.606  |
| H  | 8.604  | 0.422  | -1.288 |
| H  | 7.176  | 1.389  | 1.376  |
| C  | -1.663 | 0.988  | 1.232  |
| N  | -0.607 | 1.508  | 0.282  |
| C  | -1.419 | -0.564 | 1.175  |
| C  | 0.151  | 0.530  | -0.279 |
| N  | -0.302 | -0.678 | 0.173  |
| C  | -0.466 | -2.975 | -0.799 |
| C  | 0.195  | -4.183 | -1.119 |

|   |        |        |        |
|---|--------|--------|--------|
| C | 0.298  | -1.939 | -0.203 |
| C | 1.571  | -4.356 | -0.896 |
| C | 1.682  | -2.107 | 0.012  |
| C | 2.322  | -3.304 | -0.341 |
| C | 0.735  | 3.029  | 2.400  |
| C | 0.237  | 3.676  | 1.121  |
| C | 0.422  | 5.061  | 0.931  |
| C | -0.381 | 2.926  | 0.089  |
| C | 0.025  | 5.708  | -0.254 |
| C | 0.248  | 7.196  | -0.449 |
| C | -0.773 | 3.545  | -1.126 |
| C | -0.564 | 4.929  | -1.271 |
| C | -1.364 | 2.751  | -2.275 |
| C | -2.617 | -4.389 | 0.711  |
| C | -4.272 | -3.374 | -0.907 |
| C | -2.935 | -3.503 | -0.482 |
| C | -6.073 | -2.496 | -2.478 |
| C | -4.624 | -2.609 | -2.038 |
| C | -1.909 | -2.822 | -1.195 |
| C | -3.591 | -1.972 | -2.751 |
| C | -2.239 | -2.069 | -2.356 |
| C | -1.164 | -1.417 | -3.209 |
| C | -4.969 | 2.926  | 1.385  |
| C | -3.667 | 2.470  | 1.666  |
| C | -3.077 | 1.446  | 0.897  |
| C | -5.699 | 2.356  | 0.326  |
| C | -5.118 | 1.330  | -0.446 |
| C | -3.817 | 0.879  | -0.164 |
| C | -1.835 | -2.259 | 4.590  |
| C | -2.092 | -1.787 | 3.289  |
| C | -1.082 | -1.145 | 2.544  |
| C | -0.556 | -2.102 | 5.157  |
| C | 0.460  | -1.466 | 4.416  |
| C | 0.197  | -0.989 | 3.121  |
| H | -1.422 | 1.354  | 2.235  |
| H | -2.307 | -1.069 | 0.786  |
| H | -0.382 | -4.981 | -1.582 |
| H | 2.053  | -5.292 | -1.168 |
| H | 2.259  | -1.295 | 0.444  |
| H | 3.392  | -3.406 | -0.185 |
| H | 1.479  | 3.667  | 2.887  |
| H | 1.202  | 2.057  | 2.203  |
| H | -0.075 | 2.863  | 3.126  |
| H | 0.902  | 5.638  | 1.718  |
| H | 0.587  | 7.677  | 0.475  |
| H | -0.672 | 7.699  | -0.774 |
| H | 1.009  | 7.383  | -1.220 |
| H | -0.863 | 5.408  | -2.202 |
| H | -0.593 | 2.132  | -2.755 |
| H | -1.778 | 3.422  | -3.036 |
| H | -2.160 | 2.080  | -1.938 |
| H | -1.879 | -3.936 | 1.382  |
| H | -2.196 | -5.351 | 0.387  |
| H | -3.522 | -4.604 | 1.290  |
| H | -5.053 | -3.891 | -0.350 |
| H | -6.175 | -1.857 | -3.363 |
| H | -6.701 | -2.073 | -1.682 |
| H | -6.490 | -3.481 | -2.729 |
| H | -3.836 | -1.399 | -3.644 |
| H | -0.445 | -2.162 | -3.576 |
| H | -0.583 | -0.673 | -2.651 |
| H | -1.606 | -0.918 | -4.079 |
| H | -5.408 | 3.717  | 1.987  |
| H | -3.108 | 2.916  | 2.487  |
| H | -6.706 | 2.703  | 0.106  |

```

H   -5.675    0.882   -1.265
H   -3.392    0.085   -0.773
H   -2.624   -2.750    5.154
H   -3.083   -1.913    2.856
H   -0.352   -2.471    6.159
H    1.452   -1.347    4.844
H    0.990   -0.504    2.557
Cu   1.705    0.810   -1.427
C    5.353   -0.002   -0.954
C    4.456    0.481   -1.664
C    3.371    1.037   -2.452
H    3.520    2.111   -2.643
H    3.267    0.519   -3.418

```

```

                                1                2                3
                                A                A                A
Frequencies --                8.4146            12.2918            15.8782
Red. masses  --                5.1686            5.1226            4.8557
Zero-point correction=                                0.819068 (Hartree/Particle)
Thermal correction to Energy=                        0.871127
Thermal correction to Enthalpy=                     0.872071
Thermal correction to Gibbs Free Energy=            0.723812
Sum of electronic and zero-point Energies=         -2052.769310
Sum of electronic and thermal Energies=            -2052.717251
Sum of electronic and thermal Enthalpies=          -2052.716307
Sum of electronic and thermal Free Energies=       -2052.864566

```

```

Item                Value      Threshold  Converged?
Maximum Force       0.000088   0.000450   YES
RMS Force           0.000013   0.000300   YES

```

SCF= -2053.58837802 Hartree

**Table S1.** Relative and Gibbs free energies (298 K, 1 atm) in kcal/mol for the NHC–Cu–allenyl to NHC–Cu–propargyl isomerization without solvent correction

| structure  | 1   | 2    | 3   |
|------------|-----|------|-----|
| $\Delta G$ | 0.9 | 12.6 | 0.0 |

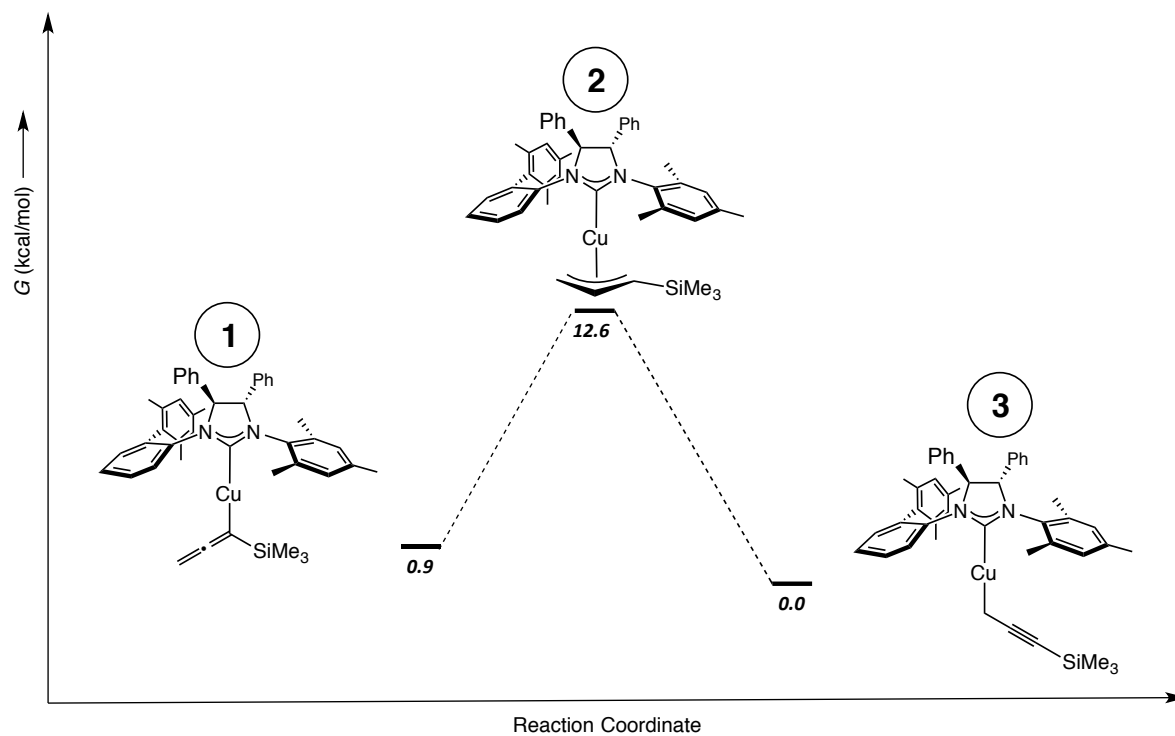

**Figure S1.** Relative Gibbs Free Energies (kcal/mol) Computed at 298 K and 1.0 atm without solvent correction.

Optimized structure for NHC–Cu–silyllallene complex **4** without solvent correction

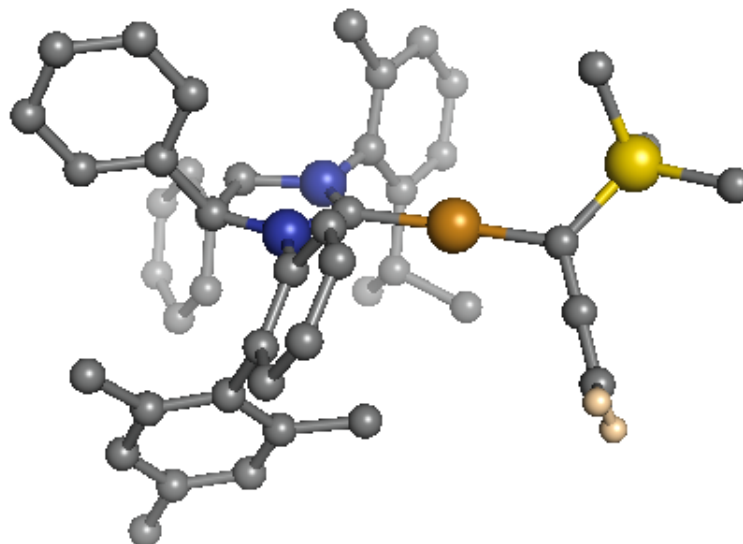

-----  
 Cartesian coordinates (Angstroms):  
 -----

|   |        |        |       |
|---|--------|--------|-------|
| C | -1.830 | -0.028 | 1.198 |
| N | -0.658 | -0.814 | 0.675 |
| C | -1.270 | 1.442  | 1.208 |
| C | 0.451  | -0.052 | 0.438 |
| N | 0.143  | 1.246  | 0.701 |
| C | 1.758  | 2.620  | 1.951 |



|   |        |        |        |
|---|--------|--------|--------|
| C | 2.686  | 3.678  | 1.991  |
| C | 1.116  | 2.323  | 0.716  |
| C | 2.985  | 4.414  | 0.832  |
| C | 1.422  | 3.038  | -0.469 |
| C | 2.367  | 4.087  | -0.382 |
| C | 0.192  | -3.034 | 1.266  |
| C | 0.211  | -4.430 | 1.133  |
| C | -0.690 | -2.248 | 0.496  |
| C | -0.673 | -5.053 | 0.234  |
| C | -1.566 | -2.859 | -0.438 |
| C | -1.547 | -4.269 | -0.537 |
| C | -4.175 | -0.797 | 4.133  |
| C | -3.698 | -0.464 | 2.851  |
| C | -2.316 | -0.476 | 2.571  |
| C | -3.270 | -1.155 | 5.150  |
| C | -1.888 | -1.175 | 4.876  |
| C | -1.416 | -0.834 | 3.597  |
| C | -3.139 | 4.664  | 0.297  |
| C | -2.356 | 3.716  | 0.982  |
| C | -2.100 | 2.448  | 0.419  |
| C | -3.680 | 4.349  | -0.963 |
| C | -3.427 | 3.085  | -1.533 |
| C | -2.641 | 2.143  | -0.849 |
| H | -2.659 | -0.107 | 0.490  |
| H | -1.208 | 1.801  | 2.241  |
| H | 3.187  | 3.910  | 2.928  |
| H | 3.708  | 5.225  | 0.874  |
| C | 0.825  | 2.687  | -1.834 |
| H | 2.623  | 4.646  | -1.278 |
| H | -2.208 | -4.746 | -1.256 |
| H | -5.243 | -0.780 | 4.335  |
| H | -4.402 | -0.186 | 2.069  |
| H | -3.636 | -1.419 | 6.139  |
| H | -1.184 | -1.457 | 5.655  |
| H | -0.348 | -0.856 | 3.396  |
| H | -3.328 | 5.636  | 0.745  |
| H | -1.944 | 3.963  | 1.959  |
| H | -4.291 | 5.076  | -1.493 |
| H | -3.838 | 2.834  | -2.507 |
| H | -2.455 | 1.177  | -1.312 |
| H | -0.671 | -6.135 | 0.123  |
| H | 0.867  | -2.543 | 1.960  |
| C | 1.513  | 1.794  | 3.201  |
| H | 2.162  | 2.131  | 4.015  |
| H | 1.727  | 0.733  | 3.019  |
| H | 0.477  | 1.861  | 3.558  |
| C | 0.157  | 3.912  | -2.508 |
| H | 0.050  | 1.928  | -1.683 |
| C | 1.908  | 2.074  | -2.762 |
| H | -0.611 | 4.356  | -1.864 |
| H | -0.320 | 3.609  | -3.449 |
| H | 0.894  | 4.690  | -2.748 |
| H | 2.711  | 2.796  | -2.961 |
| H | 1.464  | 1.790  | -3.726 |
| H | 2.363  | 1.181  | -2.318 |
| C | -5.008 | 0.013  | -4.228 |
| C | -4.661 | -1.340 | -2.100 |
| C | -4.115 | -0.709 | -3.235 |
| C | -3.854 | -2.037 | -1.178 |
| C | -2.723 | -0.794 | -3.435 |
| C | -2.447 | -2.084 | -1.379 |
| C | -1.877 | -1.476 | -2.532 |
| C | -4.512 | -2.748 | -0.005 |
| H | -5.541 | -2.398 | 0.136  |
| H | -3.966 | -2.600 | 0.932  |

```

H   -4.553   -3.833   -0.175
C   -0.394   -1.582   -2.837
H   -0.166   -1.163   -3.823
H   -0.050   -2.623   -2.826
H    0.223   -1.050   -2.102
H   -5.722    0.674   -3.719
H   -5.596   -0.701   -4.823
H   -4.422    0.620   -4.928
H   -2.283   -0.336   -4.318
H   -5.736   -1.300   -1.933
H    0.908   -5.020    1.723
H    6.253   -0.790    2.353
C    5.318   -1.069    1.847
H    4.522   -0.407    2.215
H    5.065   -2.097    2.141
H    7.888   -1.680   -0.204
H    6.799    1.218    0.017
C    6.931   -2.033   -0.615
C    5.880    0.879   -0.483
Si   5.483   -0.934   -0.048
H    6.785   -3.073   -0.290
H    5.061    1.545   -0.178
H    7.010   -2.039   -1.710
H    6.019    0.995   -1.566
C    3.852   -1.431   -0.842
Cu    2.172   -0.714   -0.182
C    3.761   -2.273   -1.848
C    3.649   -3.129   -2.875
H    3.521   -4.198   -2.712
H    3.690   -2.787   -3.908

```

```

                                1                2                3
                                A                A                A
Frequencies --      13.2705          13.9216          17.6429
Red. masses  --      3.9413          4.9363           4.9970
Zero-point correction=                                0.848919 (Hartree/Particle)
Thermal correction to Energy=                        0.901351
Thermal correction to Enthalpy=                     0.902295
Thermal correction to Gibbs Free Energy=             0.756878
Sum of electronic and zero-point Energies=          -2092.039485
Sum of electronic and thermal Energies=             -2091.987053
Sum of electronic and thermal Enthalpies=           -2091.986109
Sum of electronic and thermal Free Energies=        -2092.131526

```

```

Item                Value      Threshold  Converged?
Maximum Force      0.000309    0.000450    YES
RMS Force          0.000027    0.000300    YES

```

SCF= -2092.88840401 Hartree

Transition state for isomerization of NHC–Cu–silyllallene to NHC–Cu–silylpropargyl complex **5** without solvent correction

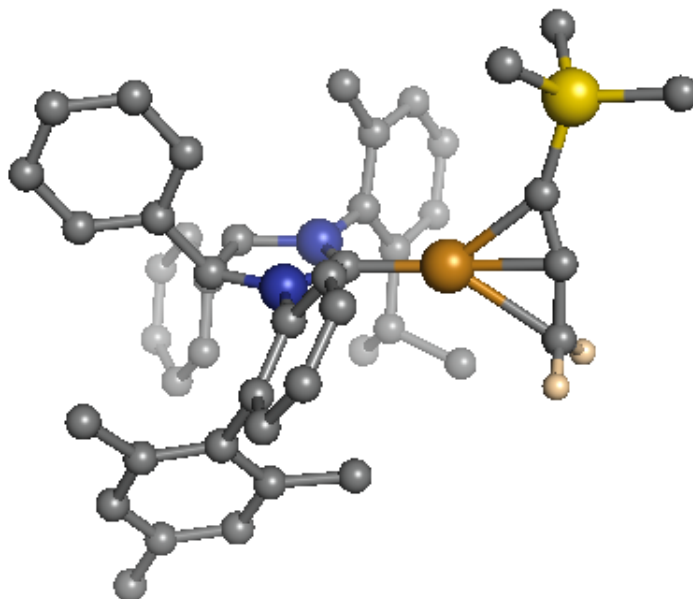

-----  
 Cartesian coordinates (Angstroms):  
 -----

|    |        |        |        |
|----|--------|--------|--------|
| H  | 6.316  | 1.407  | 0.519  |
| H  | 6.947  | 0.293  | 1.754  |
| C  | 6.092  | 0.500  | 1.095  |
| H  | 5.218  | 0.714  | 1.725  |
| H  | 7.571  | -0.451 | -1.710 |
| H  | 2.982  | 0.827  | -3.859 |
| H  | 8.167  | -1.563 | -0.457 |
| C  | 7.307  | -1.323 | -1.097 |
| Si | 5.747  | -0.970 | -0.061 |
| C  | 2.957  | -0.145 | -3.370 |
| C  | 3.804  | -0.396 | -2.293 |
| C  | 4.286  | -0.580 | -1.118 |
| H  | 7.141  | -2.169 | -1.777 |
| H  | 2.578  | -0.975 | -3.962 |
| C  | 5.354  | -2.506 | 0.994  |
| H  | 6.206  | -2.772 | 1.635  |
| H  | 4.486  | -2.325 | 1.642  |
| H  | 5.127  | -3.372 | 0.357  |
| C  | -1.397 | -0.495 | 1.219  |
| N  | -0.364 | -0.904 | 0.209  |
| C  | -1.050 | 1.019  | 1.464  |
| C  | 0.524  | 0.094  | -0.106 |
| N  | 0.134  | 1.226  | 0.549  |
| C  | 1.894  | 2.575  | 1.621  |
| C  | 2.642  | 3.764  | 1.695  |
| C  | 0.919  | 2.445  | 0.592  |
| C  | 2.446  | 4.795  | 0.760  |
| C  | 0.721  | 3.465  | -0.372 |
| C  | 1.504  | 4.637  | -0.265 |
| C  | 0.934  | -2.952 | -0.132 |
| C  | 1.085  | -4.256 | -0.624 |
| C  | -0.272 | -2.244 | -0.320 |
| C  | 0.016  | -4.875 | -1.296 |
| C  | -1.348 | -2.841 | -1.028 |

|   |        |        |        |
|---|--------|--------|--------|
| C | -1.182 | -4.166 | -1.491 |
| C | -2.556 | -2.238 | 4.432  |
| C | -2.564 | -1.571 | 3.193  |
| C | -1.359 | -1.305 | 2.511  |
| C | -1.338 | -2.656 | 5.000  |
| C | -0.131 | -2.399 | 4.321  |
| C | -0.141 | -1.725 | 3.088  |
| C | -3.460 | 3.942  | 2.046  |
| C | -2.393 | 3.036  | 2.184  |
| C | -2.207 | 1.990  | 1.256  |
| C | -4.361 | 3.809  | 0.973  |
| C | -4.181 | 2.769  | 0.040  |
| C | -3.112 | 1.867  | 0.179  |
| H | -2.393 | -0.583 | 0.778  |
| H | -0.699 | 1.147  | 2.494  |
| H | 3.393  | 3.871  | 2.475  |
| H | 3.036  | 5.706  | 0.823  |
| C | -0.257 | 3.327  | -1.541 |
| H | 1.375  | 5.431  | -0.996 |
| H | -1.998 | -4.629 | -2.040 |
| H | -3.494 | -2.434 | 4.947  |
| H | -3.509 | -1.252 | 2.757  |
| H | -1.329 | -3.177 | 5.955  |
| H | 0.814  | -2.725 | 4.751  |
| H | 0.796  | -1.535 | 2.572  |
| H | -3.590 | 4.742  | 2.772  |
| H | -1.703 | 3.141  | 3.019  |
| H | -5.190 | 4.504  | 0.865  |
| H | -4.869 | 2.660  | -0.794 |
| H | -2.994 | 1.075  | -0.556 |
| H | 0.117  | -5.888 | -1.676 |
| H | 1.754  | -2.469 | 0.391  |
| C | 2.183  | 1.444  | 2.592  |
| H | 2.983  | 1.729  | 3.283  |
| H | 2.508  | 0.547  | 2.048  |
| H | 1.309  | 1.166  | 3.195  |
| C | -1.237 | 4.525  | -1.625 |
| H | -0.852 | 2.422  | -1.382 |
| C | 0.511  | 3.149  | -2.878 |
| H | -1.784 | 4.661  | -0.686 |
| H | -1.970 | 4.355  | -2.425 |
| H | -0.710 | 5.461  | -1.854 |
| H | 1.146  | 4.021  | -3.089 |
| H | -0.197 | 3.039  | -3.711 |
| H | 1.148  | 2.258  | -2.852 |
| C | -6.310 | -0.088 | -2.540 |
| C | -5.020 | -1.763 | -1.120 |
| C | -5.026 | -0.795 | -2.146 |
| C | -3.842 | -2.434 | -0.738 |
| C | -3.809 | -0.518 | -2.799 |
| C | -2.616 | -2.113 | -1.384 |
| C | -2.604 | -1.162 | -2.442 |
| C | -3.916 | -3.505 | 0.339  |
| H | -4.867 | -3.448 | 0.881  |
| H | -3.101 | -3.421 | 1.067  |
| H | -3.843 | -4.511 | -0.097 |
| C | -1.340 | -0.866 | -3.228 |
| H | -1.547 | -0.179 | -4.056 |
| H | -0.912 | -1.784 | -3.651 |
| H | -0.552 | -0.416 | -2.612 |
| H | -6.711 | 0.506  | -1.707 |
| H | -7.089 | -0.807 | -2.827 |
| H | -6.151 | 0.588  | -3.388 |
| H | -3.796 | 0.202  | -3.615 |
| H | -5.954 | -2.008 | -0.615 |

H 2.026 -4.782 -0.478  
 Cu 2.100 -0.099 -1.177

|                                              |          |                             |         |
|----------------------------------------------|----------|-----------------------------|---------|
|                                              | 1        | 2                           | 3       |
|                                              | A        | A                           | A       |
| Frequencies --                               | -90.5143 | 14.6226                     | 15.0848 |
| Red. masses --                               | 12.6843  | 4.5055                      | 4.6202  |
| Zero-point correction=                       |          | 0.847907 (Hartree/Particle) |         |
| Thermal correction to Energy=                |          | 0.899930                    |         |
| Thermal correction to Enthalpy=              |          | 0.900874                    |         |
| Thermal correction to Gibbs Free Energy=     |          | 0.756739                    |         |
| Sum of electronic and zero-point Energies=   |          | -2092.021880                |         |
| Sum of electronic and thermal Energies=      |          | -2091.969857                |         |
| Sum of electronic and thermal Enthalpies=    |          | -2091.968913                |         |
| Sum of electronic and thermal Free Energies= |          | -2092.113048                |         |

| Item          | Value    | Threshold | Converged? |
|---------------|----------|-----------|------------|
| Maximum Force | 0.000001 | 0.000450  | YES        |
| RMS Force     | 0.000000 | 0.000300  | YES        |

SCF= -2092.86978678 Hartree

Optimized structure for NHC–Cu–silylpropargyl complex **6** without solvent correction

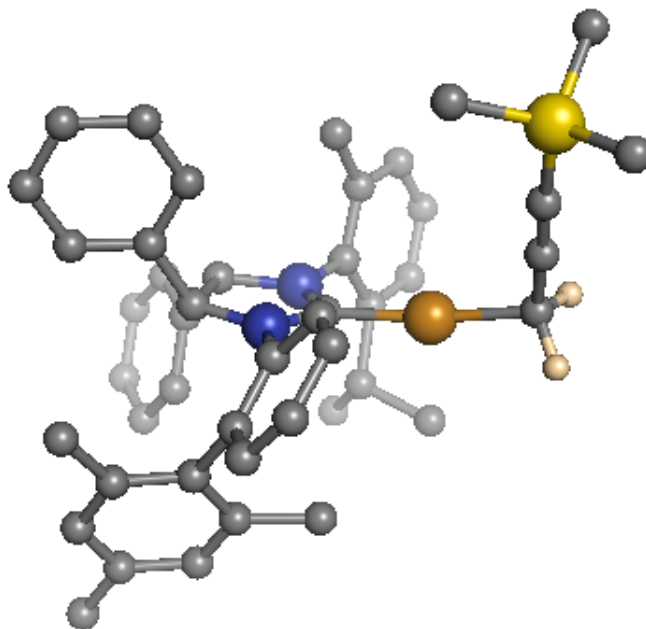

-----  
 Cartesian coordinates (Angstroms):  
 -----

|    |       |        |        |
|----|-------|--------|--------|
| H  | 4.138 | 1.649  | -2.317 |
| H  | 3.642 | 0.194  | -3.232 |
| C  | 3.760 | 0.620  | -2.224 |
| C  | 4.633 | -0.196 | -1.400 |
| H  | 8.182 | -2.384 | -1.423 |
| H  | 6.963 | -3.669 | -1.369 |
| C  | 7.575 | -3.001 | -0.748 |
| C  | 5.341 | -0.902 | -0.661 |
| H  | 8.254 | -3.621 | -0.146 |
| Si | 6.480 | -1.908 | 0.359  |
| H  | 8.183 | -0.107 | 0.759  |
| H  | 4.838 | -3.717 | 0.973  |
| C  | 7.587 | -0.767 | 1.403  |

|   |        |        |        |
|---|--------|--------|--------|
| C | 5.493  | -3.039 | 1.536  |
| H | 8.278  | -1.350 | 2.028  |
| H | 6.982  | -0.131 | 2.064  |
| H | 6.164  | -3.654 | 2.153  |
| H | 4.861  | -2.445 | 2.210  |
| C | -1.356 | -0.321 | 1.132  |
| N | -0.299 | -0.542 | 0.083  |
| C | -1.294 | 1.235  | 1.350  |
| C | 0.381  | 0.595  | -0.253 |
| N | -0.171 | 1.639  | 0.418  |
| C | 1.281  | 3.344  | 1.442  |
| C | 1.781  | 4.660  | 1.471  |
| C | 0.365  | 2.987  | 0.413  |
| C | 1.400  | 5.594  | 0.492  |
| C | -0.008 | 3.907  | -0.600 |
| C | 0.528  | 5.213  | -0.536 |
| C | 1.349  | -2.321 | -0.285 |
| C | 1.724  | -3.577 | -0.784 |
| C | 0.030  | -1.847 | -0.445 |
| C | 0.770  | -4.381 | -1.433 |
| C | -0.934 | -2.629 | -1.132 |
| C | -0.541 | -3.904 | -1.600 |
| C | -2.034 | -2.243 | 4.381  |
| C | -2.217 | -1.594 | 3.146  |
| C | -1.113 | -1.096 | 2.423  |
| C | -0.738 | -2.409 | 4.904  |
| C | 0.370  | -1.920 | 4.185  |
| C | 0.184  | -1.266 | 2.956  |
| C | -4.187 | 3.701  | 1.853  |
| C | -2.977 | 3.001  | 2.019  |
| C | -2.605 | 1.979  | 1.122  |
| C | -5.043 | 3.380  | 0.783  |
| C | -4.677 | 2.360  | -0.118 |
| C | -3.467 | 1.668  | 0.048  |
| H | -2.331 | -0.605 | 0.730  |
| H | -0.969 | 1.445  | 2.375  |
| H | 2.485  | 4.943  | 2.250  |
| H | 1.798  | 6.606  | 0.523  |
| C | -0.900 | 3.522  | -1.783 |
| H | 0.261  | 5.936  | -1.302 |
| H | -1.273 | -4.508 | -2.131 |
| H | -2.895 | -2.620 | 4.927  |
| H | -3.222 | -1.470 | 2.745  |
| H | -0.592 | -2.916 | 5.855  |
| H | 1.375  | -2.053 | 4.578  |
| H | 1.047  | -0.899 | 2.408  |
| H | -4.460 | 4.486  | 2.554  |
| H | -2.322 | 3.251  | 2.852  |
| H | -5.982 | 3.914  | 0.654  |
| H | -5.331 | 2.106  | -0.948 |
| H | -3.205 | 0.888  | -0.663 |
| H | 1.046  | -5.360 | -1.818 |
| H | 2.086  | -1.702 | 0.219  |
| C | 1.780  | 2.332  | 2.457  |
| H | 2.515  | 2.793  | 3.125  |
| H | 2.268  | 1.487  | 1.956  |
| H | 0.977  | 1.922  | 3.083  |
| C | -2.072 | 4.514  | -1.988 |
| H | -1.334 | 2.538  | -1.579 |
| C | -0.050 | 3.397  | -3.077 |
| H | -2.680 | 4.606  | -1.081 |
| H | -2.722 | 4.164  | -2.800 |
| H | -1.713 | 5.514  | -2.262 |
| H | 0.406  | 4.360  | -3.345 |
| H | -0.678 | 3.074  | -3.917 |

```

H      0.759      2.667      -2.950
C     -6.332     -0.850     -2.606
C     -4.741     -2.226     -1.172
C     -4.935     -1.294     -2.212
C     -3.456     -2.667     -0.799
C     -3.797     -0.808     -2.884
C     -2.316     -2.141     -1.468
C     -2.491     -1.218     -2.536
C     -3.318     -3.714      0.295
H     -4.245     -3.800      0.874
H     -2.500     -3.487      0.987
H     -3.102     -4.704     -0.131
C     -1.310     -0.702     -3.340
H     -1.646     -0.044     -4.148
H     -0.745     -1.530     -3.790
H     -0.599     -0.141     -2.721
H     -6.893     -0.476     -1.739
H     -6.910     -1.684     -3.028
H     -6.302     -0.054     -3.359
H     -3.924     -0.107     -3.708
H     -5.607     -2.625     -0.646
H      2.750     -3.915     -0.666
Cu      2.001      0.668     -1.339

```

```

              1              2              3
              A              A              A
Frequencies -- 7.5356      12.0153      16.9275
Red. masses -- 5.1648      5.2731      4.8423
Zero-point correction= 0.848860 (Hartree/Particle)
Thermal correction to Energy= 0.901489
Thermal correction to Enthalpy= 0.902433
Thermal correction to Gibbs Free Energy= 0.755301
Sum of electronic and zero-point Energies= -2092.039251
Sum of electronic and thermal Energies= -2091.986621
Sum of electronic and thermal Enthalpies= -2091.985677
Sum of electronic and thermal Free Energies= -2092.132809

```

```

Item          Value      Threshold  Converged?
Maximum Force 0.000006  0.000450   YES
RMS Force     0.000001  0.000300   YES

```

SCF= -2092.88811027 Hartree

**Table S2.** Relative and Gibbs free energies (298 K, 1 atm) in kcal/mol for the NHC–Cu-allenyl to NHC–Cu-propargyl isomerization without solvent correction

| structure  | 4   | 5    | 6   |
|------------|-----|------|-----|
| $\Delta G$ | 0.8 | 12.4 | 0.0 |

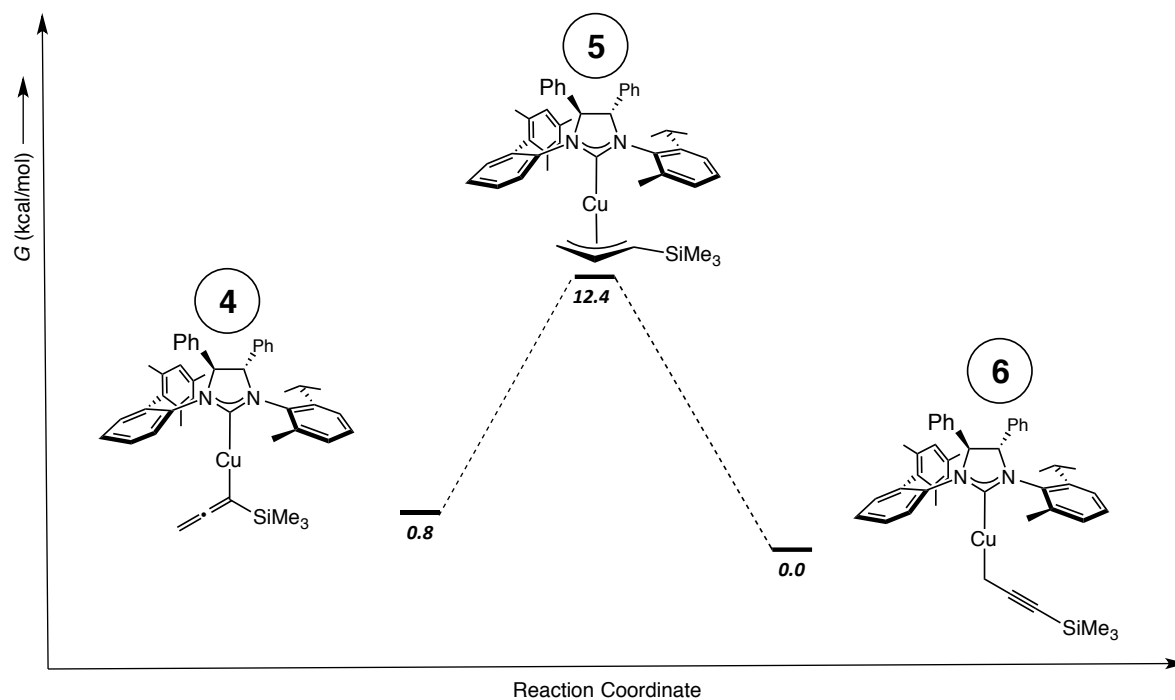

**Figure S2.** Relative Gibbs Free Energies (kcal/mol) Computed at 298 K and 1.0 atm without solvent correction.

Optimized structure for NHC–Cu–silylpropargyl complex A

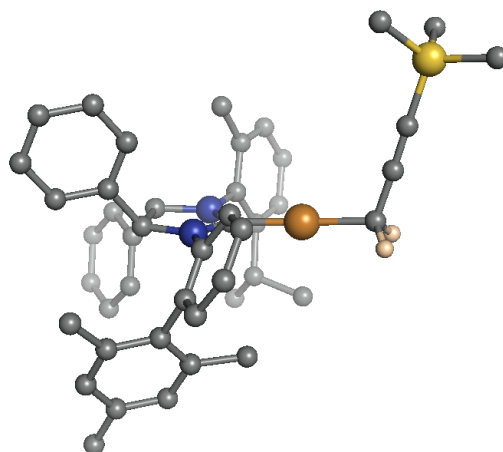

-----  
 Cartesian coordinates (Angstroms):  
 -----

|   |       |        |        |
|---|-------|--------|--------|
| H | 3.462 | 0.935  | -3.034 |
| H | 3.231 | -0.830 | -3.207 |
| C | 3.409 | -0.018 | -2.483 |
| C | 4.618 | -0.249 | -1.714 |
| H | 8.775 | -0.846 | -1.936 |
| H | 8.195 | -2.464 | -1.492 |
| C | 8.519 | -1.495 | -1.088 |



|    |        |        |        |
|----|--------|--------|--------|
| C  | 5.636  | -0.442 | -1.025 |
| H  | 9.430  | -1.660 | -0.497 |
| Si | 7.153  | -0.710 | -0.021 |
| H  | 8.004  | 1.650  | -0.174 |
| H  | 6.406  | -2.842 | 1.082  |
| C  | 7.765  | 0.962  | 0.647  |
| C  | 6.769  | -1.869 | 1.438  |
| H  | 8.671  | 0.830  | 1.256  |
| H  | 7.000  | 1.439  | 1.274  |
| H  | 7.668  | -2.043 | 2.047  |
| H  | 5.996  | -1.437 | 2.088  |
| C  | -1.590 | -0.583 | 1.224  |
| N  | -0.533 | -0.924 | 0.207  |
| C  | -1.304 | 0.937  | 1.509  |
| C  | 0.270  | 0.131  | -0.120 |
| N  | -0.159 | 1.227  | 0.559  |
| C  | 1.473  | 2.750  | 1.604  |
| C  | 2.134  | 3.993  | 1.634  |
| C  | 0.535  | 2.502  | 0.563  |
| C  | 1.886  | 4.964  | 0.647  |
| C  | 0.283  | 3.462  | -0.452 |
| C  | 0.978  | 4.692  | -0.387 |
| C  | 0.862  | -2.909 | -0.114 |
| C  | 1.093  | -4.194 | -0.629 |
| C  | -0.364 | -2.249 | -0.344 |
| C  | 0.083  | -4.836 | -1.370 |
| C  | -1.383 | -2.873 | -1.109 |
| C  | -1.136 | -4.176 | -1.600 |
| C  | -2.724 | -2.535 | 4.324  |
| C  | -2.739 | -1.824 | 3.109  |
| C  | -1.534 | -1.432 | 2.490  |
| C  | -1.498 | -2.870 | 4.930  |
| C  | -0.289 | -2.488 | 4.313  |
| C  | -0.308 | -1.771 | 3.103  |
| C  | -3.839 | 3.713  | 2.257  |
| C  | -2.730 | 2.849  | 2.343  |
| C  | -2.505 | 1.860  | 1.362  |
| C  | -4.743 | 3.591  | 1.185  |
| C  | -4.526 | 2.605  | 0.201  |
| C  | -3.415 | 1.748  | 0.287  |
| H  | -2.575 | -0.700 | 0.767  |
| H  | -0.921 | 1.047  | 2.529  |
| H  | 2.856  | 4.193  | 2.423  |
| H  | 2.407  | 5.917  | 0.678  |
| C  | -0.664 | 3.206  | -1.628 |
| H  | 0.808  | 5.441  | -1.155 |
| H  | -1.907 | -4.663 | -2.191 |
| H  | -3.661 | -2.828 | 4.791  |
| H  | -3.690 | -1.569 | 2.646  |
| H  | -1.483 | -3.423 | 5.866  |
| H  | 0.661  | -2.747 | 4.772  |
| H  | 0.632  | -1.484 | 2.639  |
| H  | -3.998 | 4.468  | 3.022  |
| H  | -2.039 | 2.944  | 3.179  |
| H  | -5.604 | 4.251  | 1.117  |
| H  | -5.220 | 2.505  | -0.630 |
| H  | -3.268 | 0.999  | -0.487 |
| H  | 0.245  | -5.834 | -1.769 |
| H  | 1.628  | -2.412 | 0.474  |
| C  | 1.808  | 1.704  | 2.653  |
| H  | 2.680  | 2.016  | 3.236  |
| H  | 2.040  | 0.736  | 2.193  |
| H  | 0.984  | 1.543  | 3.361  |
| C  | -1.726 | 4.325  | -1.778 |
| H  | -1.196 | 2.268  | -1.444 |

|    |        |        |        |
|----|--------|--------|--------|
| C  | 0.136  | 3.037  | -2.949 |
| H  | -2.306 | 4.450  | -0.857 |
| H  | -2.422 | 4.072  | -2.589 |
| H  | -1.263 | 5.289  | -2.027 |
| H  | 0.692  | 3.952  | -3.193 |
| H  | -0.548 | 2.823  | -3.781 |
| H  | 0.855  | 2.212  | -2.874 |
| C  | -6.440 | -0.307 | -2.643 |
| C  | -5.099 | -1.961 | -1.241 |
| C  | -5.133 | -0.960 | -2.233 |
| C  | -3.896 | -2.595 | -0.862 |
| C  | -3.918 | -0.604 | -2.854 |
| C  | -2.677 | -2.197 | -1.476 |
| C  | -2.693 | -1.210 | -2.501 |
| C  | -3.941 | -3.704 | 0.177  |
| H  | -4.896 | -3.696 | 0.714  |
| H  | -3.134 | -3.617 | 0.912  |
| H  | -3.834 | -4.690 | -0.294 |
| C  | -1.432 | -0.830 | -3.259 |
| H  | -1.657 | -0.105 | -4.048 |
| H  | -0.972 | -1.710 | -3.728 |
| H  | -0.671 | -0.388 | -2.604 |
| H  | -7.158 | -0.292 | -1.814 |
| H  | -6.910 | -0.854 | -3.473 |
| H  | -6.284 | 0.725  | -2.980 |
| H  | -3.923 | 0.150  | -3.639 |
| H  | -6.026 | -2.259 | -0.755 |
| H  | 2.045  | -4.687 | -0.448 |
| Cu | 1.821  | 0.067  | -1.306 |

|                                              |        |         |                             |
|----------------------------------------------|--------|---------|-----------------------------|
|                                              | 1      | 2       | 3                           |
|                                              | A      | A       | A                           |
| Frequencies --                               | 4.3589 | 10.6029 | 14.2626                     |
| Red. masses --                               | 4.5959 | 5.1509  | 4.9321                      |
| Zero-point correction=                       |        |         | 0.847933 (Hartree/Particle) |
| Thermal correction to Energy=                |        |         | 0.900639                    |
| Thermal correction to Enthalpy=              |        |         | 0.901583                    |
| Thermal correction to Gibbs Free Energy=     |        |         | 0.753102                    |
| Sum of electronic and zero-point Energies=   |        |         | -2092.058218                |
| Sum of electronic and thermal Energies=      |        |         | -2092.005512                |
| Sum of electronic and thermal Enthalpies=    |        |         | -2092.004568                |
| Sum of electronic and thermal Free Energies= |        |         | -2092.153048                |

| Item          | Value    | Threshold | Converged? |
|---------------|----------|-----------|------------|
| Maximum Force | 0.000158 | 0.000450  | YES        |
| RMS Force     | 0.000033 | 0.000300  | YES        |

SCF= -2092.90615056 Hartree

Transition state for isomerization of NHC–Cu–silyllallene to NHC–Cu–silylpropargyl complex **B**

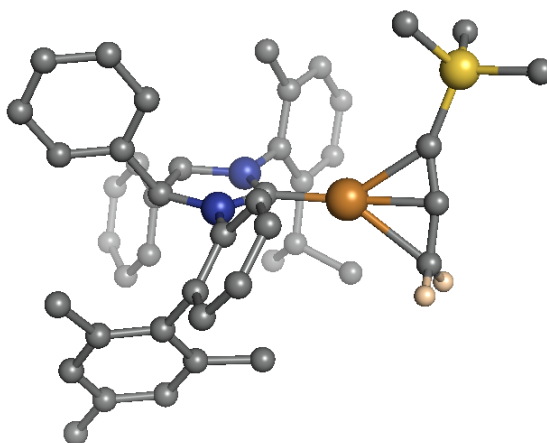

-----  
 Cartesian coordinates (Angstroms):  
 -----

|    |        |        |        |
|----|--------|--------|--------|
| H  | 6.667  | 1.600  | -0.214 |
| H  | 7.267  | 0.850  | 1.283  |
| C  | 6.407  | 0.912  | 0.602  |
| H  | 5.564  | 1.349  | 1.153  |
| H  | 7.704  | -0.846 | -1.884 |
| H  | 2.965  | 0.378  | -3.962 |
| H  | 8.325  | -1.602 | -0.398 |
| C  | 7.441  | -1.505 | -1.046 |
| Si | 5.958  | -0.807 | -0.074 |
| C  | 3.030  | -0.541 | -3.381 |
| C  | 3.914  | -0.619 | -2.303 |
| C  | 4.456  | -0.649 | -1.143 |
| H  | 7.211  | -2.498 | -1.455 |
| H  | 2.691  | -1.452 | -3.870 |
| C  | 5.574  | -1.973 | 1.377  |
| H  | 6.451  | -2.087 | 2.029  |
| H  | 4.746  | -1.580 | 1.984  |
| H  | 5.286  | -2.970 | 1.018  |
| C  | -1.299 | -0.684 | 1.220  |
| N  | -0.265 | -1.100 | 0.211  |
| C  | -0.909 | 0.812  | 1.507  |
| C  | 0.646  | -0.117 | -0.076 |
| N  | 0.290  | 1.007  | 0.606  |
| C  | 2.051  | 2.304  | 1.741  |
| C  | 2.831  | 3.472  | 1.841  |
| C  | 1.107  | 2.203  | 0.679  |
| C  | 2.694  | 4.511  | 0.903  |
| C  | 0.966  | 3.234  | -0.285 |
| C  | 1.778  | 4.384  | -0.150 |
| C  | 0.999  | -3.161 | -0.159 |
| C  | 1.141  | -4.456 | -0.679 |
| C  | -0.195 | -2.431 | -0.344 |
| C  | 0.069  | -5.043 | -1.379 |
| C  | -1.276 | -3.001 | -1.067 |
| C  | -1.119 | -4.317 | -1.563 |

|   |        |        |        |
|---|--------|--------|--------|
| C | -2.570 | -2.482 | 4.360  |
| C | -2.534 | -1.781 | 3.140  |
| C | -1.307 | -1.529 | 2.491  |
| C | -1.375 | -2.950 | 4.941  |
| C | -0.146 | -2.708 | 4.293  |
| C | -0.113 | -2.000 | 3.079  |
| C | -3.241 | 3.788  | 2.140  |
| C | -2.204 | 2.845  | 2.268  |
| C | -2.032 | 1.824  | 1.310  |
| C | -4.126 | 3.716  | 1.047  |
| C | -3.960 | 2.699  | 0.084  |
| C | -2.920 | 1.762  | 0.213  |
| H | -2.290 | -0.731 | 0.763  |
| H | -0.563 | 0.903  | 2.542  |
| H | 3.556  | 3.559  | 2.647  |
| H | 3.306  | 5.406  | 0.988  |
| C | 0.016  | 3.131  | -1.481 |
| H | 1.693  | 5.184  | -0.881 |
| H | -1.938 | -4.760 | -2.123 |
| H | -3.522 | -2.666 | 4.851  |
| H | -3.462 | -1.426 | 2.695  |
| H | -1.400 | -3.496 | 5.880  |
| H | 0.780  | -3.071 | 4.732  |
| H | 0.841  | -1.821 | 2.591  |
| H | -3.361 | 4.567  | 2.889  |
| H | -1.530 | 2.901  | 3.121  |
| H | -4.932 | 4.438  | 0.946  |
| H | -4.637 | 2.639  | -0.764 |
| H | -2.813 | 0.989  | -0.544 |
| H | 0.161  | -6.049 | -1.782 |
| H | 1.813  | -2.708 | 0.399  |
| C | 2.266  | 1.177  | 2.735  |
| H | 3.115  | 1.403  | 3.388  |
| H | 2.478  | 0.232  | 2.220  |
| H | 1.393  | 1.013  | 3.379  |
| C | -0.937 | 4.349  | -1.574 |
| H | -0.600 | 2.235  | -1.351 |
| C | 0.815  | 2.963  | -2.801 |
| H | -1.516 | 4.474  | -0.652 |
| H | -1.643 | 4.210  | -2.404 |
| H | -0.385 | 5.279  | -1.762 |
| H | 1.450  | 3.838  | -2.992 |
| H | 0.127  | 2.851  | -3.649 |
| H | 1.458  | 2.075  | -2.762 |
| C | -6.254 | -0.193 | -2.429 |
| C | -4.953 | -1.932 | -1.096 |
| C | -4.972 | -0.931 | -2.087 |
| C | -3.766 | -2.611 | -0.745 |
| C | -3.762 | -0.631 | -2.747 |
| C | -2.548 | -2.264 | -1.392 |
| C | -2.553 | -1.281 | -2.421 |
| C | -3.830 | -3.717 | 0.297  |
| H | -4.775 | -3.676 | 0.850  |
| H | -3.009 | -3.654 | 1.019  |
| H | -3.763 | -4.707 | -0.173 |
| C | -1.299 | -0.959 | -3.215 |
| H | -1.510 | -0.210 | -3.987 |
| H | -0.905 | -1.855 | -3.713 |
| H | -0.491 | -0.573 | -2.583 |
| H | -6.410 | 0.661  | -1.754 |
| H | -7.130 | -0.846 | -2.332 |
| H | -6.231 | 0.198  | -3.453 |
| H | -3.760 | 0.114  | -3.541 |
| H | -5.880 | -2.198 | -0.590 |
| H | 2.069  | -5.001 | -0.532 |

Cu 2.211 -0.320 -1.177

|                                              | 1        | 2            | 3                  |
|----------------------------------------------|----------|--------------|--------------------|
|                                              | A        | A            | A                  |
| Frequencies --                               | -98.6607 | 13.4481      | 14.4412            |
| Red. masses --                               | 13.0194  | 4.4487       | 4.9649             |
| Zero-point correction=                       |          | 0.846787     | (Hartree/Particle) |
| Thermal correction to Energy=                |          | 0.898951     |                    |
| Thermal correction to Enthalpy=              |          | 0.899896     |                    |
| Thermal correction to Gibbs Free Energy=     |          | 0.755460     |                    |
| Sum of electronic and zero-point Energies=   |          | -2092.038214 |                    |
| Sum of electronic and thermal Energies=      |          | -2091.986049 |                    |
| Sum of electronic and thermal Enthalpies=    |          | -2091.985105 |                    |
| Sum of electronic and thermal Free Energies= |          | -2092.129540 |                    |

|         | Item  | Value    | Threshold | Converged? |
|---------|-------|----------|-----------|------------|
| Maximum | Force | 0.000001 | 0.000450  | YES        |
| RMS     | Force | 0.000000 | 0.000300  | YES        |

SCF= -2092.88500039 Hartree

### Optimized structure for NHC-Cu-silyllallene complex C

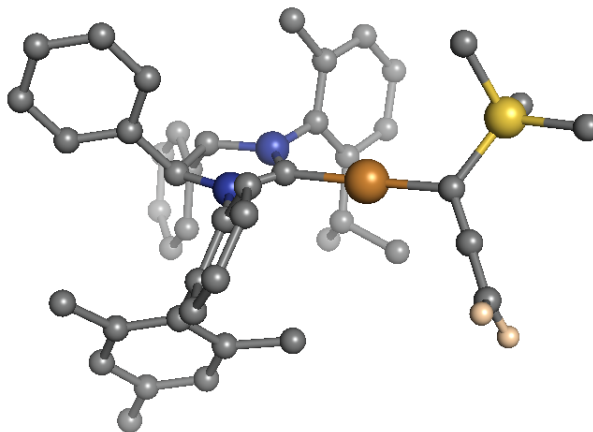

-----  
 Cartesian coordinates (Angstroms):  
 -----

|   |        |        |        |
|---|--------|--------|--------|
| C | -1.800 | -0.043 | 1.156  |
| N | -0.644 | -0.841 | 0.612  |
| C | -1.211 | 1.414  | 1.198  |
| C | 0.466  | -0.089 | 0.355  |
| N | 0.180  | 1.211  | 0.631  |
| C | 1.815  | 2.627  | 1.813  |
| C | 2.748  | 3.682  | 1.799  |
| C | 1.157  | 2.283  | 0.598  |
| C | 3.032  | 4.375  | 0.608  |
| C | 1.444  | 2.958  | -0.617 |
| C | 2.393  | 4.006  | -0.583 |

|   |        |        |        |
|---|--------|--------|--------|
| C | 0.188  | -3.074 | 1.174  |
| C | 0.188  | -4.470 | 1.033  |
| C | -0.698 | -2.273 | 0.423  |
| C | -0.720 | -5.077 | 0.145  |
| C | -1.603 | -2.867 | -0.494 |
| C | -1.601 | -4.277 | -0.602 |
| C | -4.156 | -0.869 | 4.068  |
| C | -3.675 | -0.514 | 2.793  |
| C | -2.291 | -0.514 | 2.521  |
| C | -3.254 | -1.239 | 5.084  |
| C | -1.870 | -1.247 | 4.817  |
| C | -1.393 | -0.884 | 3.546  |
| C | -3.048 | 4.704  | 0.498  |
| C | -2.264 | 3.710  | 1.114  |
| C | -2.045 | 2.467  | 0.482  |
| C | -3.627 | 4.462  | -0.763 |
| C | -3.412 | 3.223  | -1.400 |
| C | -2.626 | 2.234  | -0.784 |
| H | -2.630 | -0.092 | 0.449  |
| H | -1.100 | 1.730  | 2.241  |
| H | 3.261  | 3.951  | 2.720  |
| H | 3.757  | 5.185  | 0.611  |
| C | 0.813  | 2.571  | -1.957 |
| H | 2.634  | 4.535  | -1.501 |
| H | -2.286 | -4.745 | -1.305 |
| H | -5.225 | -0.862 | 4.264  |
| H | -4.378 | -0.230 | 2.013  |
| H | -3.623 | -1.519 | 6.068  |
| H | -1.168 | -1.535 | 5.595  |
| H | -0.323 | -0.894 | 3.354  |
| H | -3.208 | 5.656  | 0.998  |
| H | -1.828 | 3.900  | 2.093  |
| H | -4.237 | 5.225  | -1.241 |
| H | -3.854 | 3.030  | -2.375 |
| H | -2.472 | 1.288  | -1.298 |
| H | -0.736 | -6.158 | 0.030  |
| H | 0.871  | -2.596 | 1.869  |
| C | 1.569  | 1.870  | 3.106  |
| H | 2.328  | 2.132  | 3.851  |
| H | 1.608  | 0.785  | 2.951  |
| H | 0.590  | 2.105  | 3.545  |
| C | 0.149  | 3.782  | -2.660 |
| H | 0.032  | 1.828  | -1.768 |
| C | 1.869  | 1.916  | -2.889 |
| H | -0.603 | 4.252  | -2.018 |
| H | -0.347 | 3.452  | -3.583 |
| H | 0.890  | 4.542  | -2.937 |
| H | 2.678  | 2.621  | -3.123 |
| H | 1.403  | 1.610  | -3.835 |
| H | 2.318  | 1.029  | -2.424 |
| C | -5.143 | 0.129  | -4.099 |
| C | -4.743 | -1.313 | -2.038 |
| C | -4.227 | -0.641 | -3.166 |
| C | -3.912 | -2.038 | -1.159 |
| C | -2.841 | -0.722 | -3.406 |
| C | -2.509 | -2.075 | -1.397 |
| C | -1.973 | -1.431 | -2.546 |
| C | -4.543 | -2.787 | 0.004  |
| H | -5.562 | -2.431 | 0.191  |
| H | -3.967 | -2.679 | 0.929  |
| H | -4.602 | -3.864 | -0.206 |
| C | -0.499 | -1.534 | -2.898 |
| H | -0.301 | -1.088 | -3.879 |
| H | -0.167 | -2.579 | -2.927 |
| H | 0.139  | -1.024 | -2.166 |

|    |        |        |        |
|----|--------|--------|--------|
| H  | -5.683 | 0.922  | -3.563 |
| H  | -5.901 | -0.529 | -4.546 |
| H  | -4.582 | 0.596  | -4.916 |
| H  | -2.424 | -0.236 | -4.286 |
| H  | -5.813 | -1.280 | -1.843 |
| H  | 0.881  | -5.073 | 1.613  |
| H  | 6.070  | -0.708 | 2.559  |
| C  | 5.201  | -1.072 | 1.993  |
| H  | 4.319  | -0.506 | 2.322  |
| H  | 5.042  | -2.128 | 2.254  |
| H  | 7.916  | -1.453 | 0.160  |
| H  | 6.615  | 1.367  | 0.289  |
| C  | 7.037  | -1.829 | -0.383 |
| C  | 5.741  | 0.980  | -0.255 |
| Si | 5.470  | -0.868 | 0.118  |
| H  | 6.932  | -2.899 | -0.159 |
| H  | 4.865  | 1.574  | 0.040  |
| H  | 7.235  | -1.730 | -1.459 |
| H  | 5.909  | 1.141  | -1.329 |
| C  | 3.929  | -1.468 | -0.793 |
| Cu | 2.194  | -0.767 | -0.244 |
| C  | 3.962  | -2.338 | -1.777 |
| C  | 3.981  | -3.225 | -2.789 |
| H  | 3.888  | -4.296 | -2.610 |
| H  | 4.083  | -2.905 | -3.825 |

|                                              |         |         |                             |
|----------------------------------------------|---------|---------|-----------------------------|
|                                              | 1       | 2       | 3                           |
|                                              | A       | A       | A                           |
| Frequencies --                               | 13.8520 | 16.8380 | 18.1505                     |
| Red. masses --                               | 5.1900  | 4.9552  | 5.0507                      |
| Zero-point correction=                       |         |         | 0.847975 (Hartree/Particle) |
| Thermal correction to Energy=                |         |         | 0.900488                    |
| Thermal correction to Enthalpy=              |         |         | 0.901432                    |
| Thermal correction to Gibbs Free Energy=     |         |         | 0.756541                    |
| Sum of electronic and zero-point Energies=   |         |         | -2092.058446                |
| Sum of electronic and thermal Energies=      |         |         | -2092.005933                |
| Sum of electronic and thermal Enthalpies=    |         |         | -2092.004989                |
| Sum of electronic and thermal Free Energies= |         |         | -2092.149880                |

|         | Item  | Value    | Threshold | Converged? |
|---------|-------|----------|-----------|------------|
| Maximum | Force | 0.000010 | 0.000450  | YES        |
| RMS     | Force | 0.000001 | 0.000300  | YES        |

SCF= -2092.90642099 Hartree

**The transition state (7) leading to minor (propargyl) isomer:** Dissymmetric N-Aryl methyl is oriented syn to biaryl mesityl group (both pointing to the rear) with the phosphinoylimine approaching from front side of the complex and the terminal allene carbon side pointing to the back.

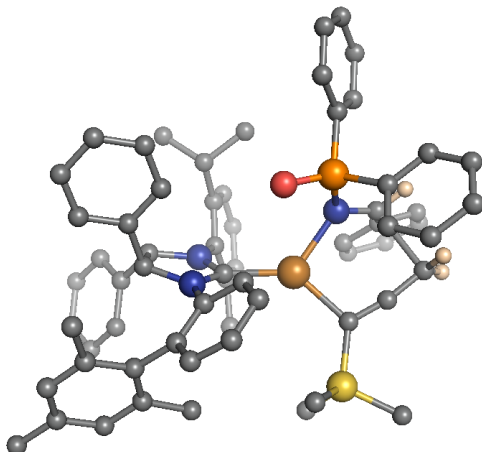

-----  
 Cartesian coordinates (Angstroms):  
 -----

|    |        |        |        |
|----|--------|--------|--------|
| H  | -1.096 | -3.891 | -0.993 |
| C  | -0.726 | -2.567 | -4.136 |
| C  | -0.531 | -4.512 | -1.695 |
| C  | 1.568  | -2.237 | -2.062 |
| Si | 0.444  | -3.473 | -2.946 |
| H  | -1.236 | -5.175 | -2.216 |
| C  | 2.850  | -2.252 | -2.083 |
| H  | 0.152  | -5.141 | -1.108 |
| C  | 1.513  | -4.657 | -3.987 |
| H  | 0.886  | -5.399 | -4.501 |
| H  | 2.081  | -4.106 | -4.750 |
| H  | 2.231  | -5.196 | -3.355 |
| C  | -2.748 | 0.641  | 1.183  |
| N  | -1.804 | -0.374 | 0.592  |
| C  | -2.434 | 1.925  | 0.352  |
| C  | -0.847 | 0.186  | -0.231 |
| N  | -1.195 | 1.497  | -0.411 |
| C  | 0.106  | 3.589  | -0.668 |
| C  | 0.556  | 4.629  | -1.513 |
| C  | -0.557 | 2.482  | -1.261 |
| C  | 0.366  | 4.573  | -2.900 |
| C  | -0.727 | 2.393  | -2.671 |
| C  | -0.259 | 3.452  | -3.473 |
| C  | -3.014 | -2.531 | 1.059  |
| C  | -2.927 | -3.854 | 1.557  |
| C  | -1.823 | -1.746 | 1.050  |
| C  | -1.726 | -4.400 | 2.035  |
| C  | -0.618 | -2.290 | 1.546  |
| C  | -0.565 | -3.606 | 2.030  |
| C  | 0.394  | 3.682  | 0.834  |
| C  | -3.452 | 1.577  | 4.833  |
| C  | -3.625 | 1.260  | 3.473  |
| C  | -2.526 | 0.869  | 2.678  |



|   |        |        |        |
|---|--------|--------|--------|
| C | -2.172 | 1.498  | 5.417  |
| C | -1.074 | 1.099  | 4.629  |
| C | -1.244 | 0.788  | 3.267  |
| C | -4.827 | 4.373  | -1.387 |
| C | -3.793 | 3.845  | -0.590 |
| C | -3.562 | 2.454  | -0.528 |
| C | -5.650 | 3.509  | -2.134 |
| C | -5.430 | 2.118  | -2.075 |
| C | -4.394 | 1.597  | -1.281 |
| H | -3.780 | 0.329  | 1.018  |
| H | -2.144 | 2.730  | 1.031  |
| H | 1.063  | 5.487  | -1.078 |
| H | 0.711  | 5.388  | -3.532 |
| C | -1.375 | 1.192  | -3.329 |
| H | -0.398 | 3.400  | -4.551 |
| H | -3.829 | -4.461 | 1.558  |
| H | 0.370  | -3.998 | 2.423  |
| H | -4.308 | 1.877  | 5.433  |
| H | -4.618 | 1.318  | 3.030  |
| H | -2.034 | 1.738  | 6.468  |
| H | -0.083 | 1.028  | 5.072  |
| H | -0.378 | 0.473  | 2.688  |
| H | -4.990 | 5.447  | -1.421 |
| H | -3.168 | 4.522  | -0.011 |
| H | -6.452 | 3.911  | -2.748 |
| H | -6.065 | 1.441  | -2.642 |
| H | -4.251 | 0.523  | -1.240 |
| H | -2.324 | 0.928  | -2.853 |
| H | -0.724 | 0.313  | -3.261 |
| H | -1.566 | 1.389  | -4.390 |
| C | 1.922  | 3.678  | 1.087  |
| H | -0.005 | 2.788  | 1.325  |
| C | -0.258 | 4.927  | 1.490  |
| H | 2.387  | 2.804  | 0.622  |
| H | 2.129  | 3.644  | 2.165  |
| H | 2.398  | 4.580  | 0.680  |
| H | 0.145  | 5.856  | 1.065  |
| H | -0.053 | 4.935  | 2.568  |
| H | -1.347 | 4.944  | 1.354  |
| H | -5.980 | -1.512 | 3.596  |
| H | -5.147 | -3.054 | 3.341  |
| C | -5.176 | -2.000 | 3.032  |
| H | -7.497 | -1.375 | 1.818  |
| H | -4.225 | -1.554 | 3.338  |
| H | -8.694 | -1.628 | -1.671 |
| C | -6.713 | -1.551 | 1.083  |
| C | -5.416 | -1.874 | 1.536  |
| C | -8.420 | -1.090 | -0.755 |
| C | -7.025 | -1.463 | -0.288 |
| C | -4.377 | -2.092 | 0.586  |
| H | -8.488 | -0.015 | -0.975 |
| H | -9.173 | -1.315 | 0.011  |
| C | -5.993 | -1.717 | -1.215 |
| C | -4.681 | -2.028 | -0.802 |
| H | -6.213 | -1.676 | -2.280 |
| C | -3.627 | -2.321 | -1.852 |
| H | -3.317 | -3.373 | -1.821 |
| H | -2.723 | -1.721 | -1.697 |
| H | -4.007 | -2.114 | -2.859 |
| H | 0.262  | -1.656 | 1.612  |
| H | -1.700 | -5.420 | 2.410  |
| C | 4.207  | -2.075 | -1.977 |
| H | 4.413  | 2.795  | -5.617 |
| H | 2.185  | 2.534  | -4.519 |
| C | 4.324  | 2.241  | -4.686 |

|    |        |        |        |
|----|--------|--------|--------|
| C  | 3.067  | 2.091  | -4.068 |
| H  | 6.444  | 1.795  | -4.545 |
| C  | 5.468  | 1.676  | -4.082 |
| C  | 2.944  | 1.382  | -2.859 |
| C  | 5.344  | 0.957  | -2.884 |
| H  | 1.977  | 1.295  | -2.373 |
| C  | 4.080  | 0.791  | -2.260 |
| H  | 6.227  | 0.512  | -2.428 |
| C  | 4.009  | 0.025  | -0.993 |
| H  | 4.968  | 1.924  | 0.500  |
| N  | 2.906  | 0.054  | -0.197 |
| H  | 4.986  | -0.219 | -0.570 |
| H  | 6.329  | 3.600  | 1.704  |
| C  | 4.979  | 1.914  | 1.585  |
| C  | 5.748  | 2.876  | 2.269  |
| P  | 3.168  | -0.350 | 1.507  |
| C  | 4.219  | 0.975  | 2.308  |
| C  | 5.755  | 2.907  | 3.676  |
| C  | 4.166  | -1.930 | 1.638  |
| H  | 6.084  | -0.979 | 2.012  |
| C  | 5.554  | -1.918 | 1.882  |
| C  | 3.488  | -3.159 | 1.488  |
| C  | 4.221  | 1.011  | 3.720  |
| C  | 4.987  | 1.974  | 4.402  |
| C  | 6.263  | -3.133 | 1.973  |
| C  | 4.196  | -4.369 | 1.582  |
| H  | 7.333  | -3.120 | 2.162  |
| H  | 3.623  | 0.299  | 4.283  |
| H  | 4.982  | 1.997  | 5.488  |
| O  | 1.750  | -0.500 | 2.266  |
| Cu | 0.928  | -0.608 | -0.834 |
| H  | 6.133  | -5.295 | 1.895  |
| C  | 5.586  | -4.359 | 1.823  |
| H  | 3.671  | -5.313 | 1.466  |
| H  | 2.419  | -3.170 | 1.297  |
| H  | 6.348  | 3.651  | 4.202  |
| H  | -1.339 | -3.293 | -4.690 |
| H  | -0.153 | -1.981 | -4.867 |
| H  | -1.403 | -1.886 | -3.612 |
| H  | 4.765  | -2.641 | -1.232 |
| H  | 4.775  | -1.718 | -2.833 |

|                                              | 1         | 2            | 3                           |
|----------------------------------------------|-----------|--------------|-----------------------------|
|                                              | A         | A            | A                           |
| Frequencies --                               | -231.5865 | 12.1531      | 14.7664                     |
| Red. masses --                               | 8.3145    | 5.0229       | 5.1538                      |
| Zero-point correction=                       |           |              | 1.151782 (Hartree/Particle) |
| Thermal correction to Energy=                |           | 1.223358     |                             |
| Thermal correction to Enthalpy=              |           | 1.224302     |                             |
| Thermal correction to Gibbs Free Energy=     |           | 1.038652     |                             |
| Sum of electronic and zero-point Energies=   |           | -2961.710458 |                             |
| Sum of electronic and thermal Energies=      |           | -2961.638882 |                             |
| Sum of electronic and thermal Enthalpies=    |           | -2961.637938 |                             |
| Sum of electronic and thermal Free Energies= |           | -2961.823588 |                             |

| Item          | Value    | Threshold | Converged? |
|---------------|----------|-----------|------------|
| Maximum Force | 0.000334 | 0.000450  | YES        |
| RMS Force     | 0.000024 | 0.000300  | YES        |

SCF= -2962.86224001 Hartree

**The transition state (8) leading to minor (propargyl) isomer:** Dissymmetric N-Aryl *iso*-propyl is oriented syn to biaryl mesityl group (both pointing to the rear) with the phosphinoylimine approaching from front side of the complex and the terminal allene carbon side pointing to the back.

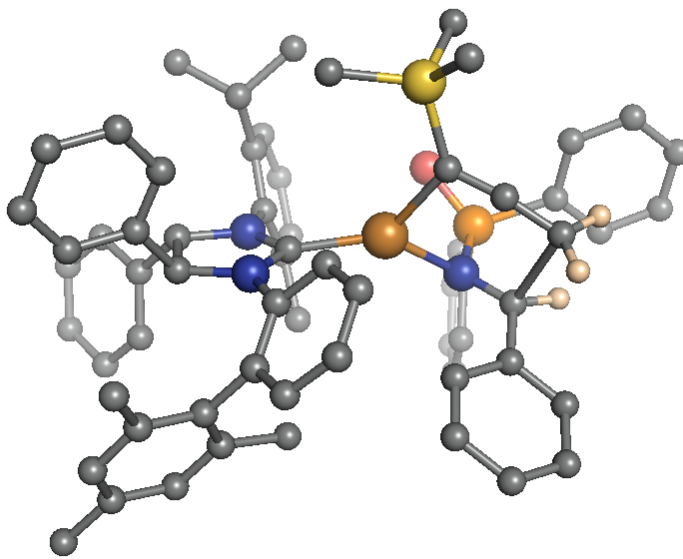

-----  
 Cartesian coordinates (Angstroms):  
 -----

|    |        |        |        |
|----|--------|--------|--------|
| H  | -0.927 | -2.970 | -2.866 |
| C  | -0.401 | -0.334 | -4.970 |
| C  | -0.282 | -3.183 | -3.724 |
| C  | 1.739  | -0.984 | -2.800 |
| Si | 0.735  | -1.673 | -4.248 |
| H  | -0.917 | -3.520 | -4.556 |
| C  | 3.021  | -0.977 | -2.744 |
| H  | 0.377  | -4.015 | -3.443 |
| C  | 1.927  | -2.224 | -5.628 |
| H  | 1.370  | -2.634 | -6.483 |
| H  | 2.532  | -1.381 | -5.989 |
| H  | 2.615  | -3.000 | -5.265 |
| C  | -2.646 | -0.254 | 1.454  |
| N  | -1.690 | -0.758 | 0.404  |
| C  | -2.274 | 1.261  | 1.553  |
| C  | -0.778 | 0.183  | -0.018 |
| N  | -1.134 | 1.372  | 0.561  |
| C  | -0.678 | 3.507  | -0.638 |
| C  | -0.019 | 4.757  | -0.653 |
| C  | -0.427 | 2.632  | 0.453  |
| C  | 0.848  | 5.138  | 0.381  |
| C  | 0.451  | 3.003  | 1.511  |
| C  | 1.081  | 4.263  | 1.454  |
| C  | -2.875 | -2.788 | -0.471 |
| C  | -2.794 | -4.167 | -0.779 |

|   |        |        |        |
|---|--------|--------|--------|
| C | -1.698 | -2.150 | 0.015  |
| C | -1.609 | -4.902 | -0.619 |
| C | -0.507 | -2.888 | 0.185  |
| C | -0.458 | -4.254 | -0.134 |
| C | -1.613 | 3.149  | -1.796 |
| C | -3.573 | -1.698 | 4.882  |
| C | -3.666 | -1.139 | 3.594  |
| C | -2.512 | -0.960 | 2.801  |
| C | -2.319 | -2.096 | 5.387  |
| C | -1.165 | -1.925 | 4.595  |
| C | -1.255 | -1.357 | 3.311  |
| C | -4.599 | 4.270  | 2.041  |
| C | -3.538 | 3.357  | 2.186  |
| C | -3.423 | 2.237  | 1.334  |
| C | -5.568 | 4.070  | 1.038  |
| C | -5.461 | 2.954  | 0.184  |
| C | -4.396 | 2.048  | 0.328  |
| H | -3.671 | -0.370 | 1.097  |
| H | -1.861 | 1.461  | 2.546  |
| H | -0.194 | 5.441  | -1.480 |
| H | 1.342  | 6.106  | 0.349  |
| C | 0.727  | 2.093  | 2.693  |
| H | 1.759  | 4.551  | 2.254  |
| H | -3.683 | -4.663 | -1.161 |
| H | 0.464  | -4.811 | 0.013  |
| H | -4.470 | -1.828 | 5.483  |
| H | -4.638 | -0.839 | 3.206  |
| H | -2.243 | -2.533 | 6.380  |
| H | -0.194 | -2.234 | 4.976  |
| H | -0.349 | -1.238 | 2.719  |
| H | -4.672 | 5.126  | 2.707  |
| H | -2.801 | 3.512  | 2.971  |
| H | -6.393 | 4.769  | 0.926  |
| H | -6.205 | 2.791  | -0.592 |
| H | -4.338 | 1.194  | -0.341 |
| H | 0.806  | 1.043  | 2.397  |
| H | -0.063 | 2.168  | 3.454  |
| H | 1.665  | 2.378  | 3.179  |
| C | -2.685 | 4.242  | -2.038 |
| H | -2.134 | 2.221  | -1.540 |
| C | -0.810 | 2.896  | -3.099 |
| H | -3.260 | 4.449  | -1.129 |
| H | -3.386 | 3.912  | -2.817 |
| H | -2.232 | 5.182  | -2.380 |
| H | -0.273 | 3.802  | -3.409 |
| H | -1.489 | 2.613  | -3.914 |
| H | -0.080 | 2.089  | -2.970 |
| H | -6.018 | -3.371 | 1.985  |
| H | -5.191 | -4.501 | 0.904  |
| C | -5.183 | -3.470 | 1.283  |
| H | -7.408 | -2.147 | 0.557  |
| H | -4.250 | -3.344 | 1.842  |
| H | -8.236 | 0.612  | -0.818 |
| C | -6.575 | -1.880 | -0.091 |
| C | -5.313 | -2.465 | 0.149  |
| C | -8.147 | -0.335 | -1.371 |
| C | -6.788 | -0.971 | -1.146 |
| C | -4.209 | -2.116 | -0.681 |
| H | -8.958 | -0.988 | -1.027 |
| H | -8.315 | -0.110 | -2.431 |
| C | -5.692 | -0.661 | -1.977 |
| C | -4.412 | -1.215 | -1.764 |
| H | -5.836 | 0.019  | -2.815 |
| C | -3.293 | -0.868 | -2.727 |
| H | -2.929 | -1.762 | -3.250 |

|    |        |        |        |
|----|--------|--------|--------|
| H  | -2.431 | -0.430 | -2.213 |
| H  | -3.638 | -0.155 | -3.484 |
| H  | 0.356  | -2.389 | 0.621  |
| H  | -1.586 | -5.960 | -0.868 |
| C  | 4.363  | -0.864 | -2.481 |
| H  | 4.364  | 5.139  | -3.586 |
| H  | 2.137  | 4.347  | -2.780 |
| C  | 4.287  | 4.225  | -3.002 |
| C  | 3.031  | 3.775  | -2.551 |
| H  | 6.423  | 3.833  | -3.015 |
| C  | 5.447  | 3.487  | -2.681 |
| C  | 2.925  | 2.597  | -1.789 |
| C  | 5.341  | 2.306  | -1.932 |
| H  | 1.960  | 2.273  | -1.416 |
| C  | 4.078  | 1.839  | -1.484 |
| H  | 6.237  | 1.735  | -1.693 |
| C  | 4.020  | 0.591  | -0.687 |
| H  | 4.173  | 1.969  | 1.586  |
| N  | 2.895  | 0.217  | -0.026 |
| H  | 4.999  | 0.233  | -0.357 |
| H  | 5.277  | 3.189  | 3.444  |
| C  | 4.364  | 1.457  | 2.524  |
| C  | 4.983  | 2.152  | 3.582  |
| P  | 3.122  | -0.865 | 1.352  |
| C  | 3.982  | 0.113  | 2.694  |
| C  | 5.211  | 1.510  | 4.814  |
| C  | 4.292  | -2.258 | 0.911  |
| H  | 6.116  | -1.263 | 1.554  |
| C  | 5.684  | -2.156 | 1.109  |
| C  | 3.745  | -3.433 | 0.354  |
| C  | 4.204  | -0.529 | 3.932  |
| C  | 4.817  | 0.167  | 4.989  |
| C  | 6.527  | -3.225 | 0.745  |
| C  | 4.586  | -4.500 | -0.005 |
| H  | 7.600  | -3.143 | 0.899  |
| H  | 3.899  | -1.563 | 4.076  |
| H  | 4.986  | -0.332 | 5.940  |
| O  | 1.699  | -1.454 | 1.840  |
| Cu | 0.982  | -0.144 | -0.987 |
| H  | 6.630  | -5.222 | -0.090 |
| C  | 5.980  | -4.397 | 0.188  |
| H  | 4.161  | -5.405 | -0.431 |
| H  | 2.671  | -3.512 | 0.211  |
| H  | 5.686  | 2.048  | 5.629  |
| H  | -0.967 | -0.741 | -5.820 |
| H  | 0.186  | 0.521  | -5.331 |
| H  | -1.116 | 0.038  | -4.231 |
| H  | 4.893  | -1.701 | -2.027 |
| H  | 4.970  | -0.159 | -3.042 |

|                                              |           |              |                    |
|----------------------------------------------|-----------|--------------|--------------------|
|                                              | 1         | 2            | 3                  |
|                                              | A         | A            | A                  |
| Frequencies --                               | -227.5184 | 12.7426      | 12.9178            |
| Red. masses --                               | 8.2141    | 5.0738       | 5.2489             |
| Zero-point correction=                       |           | 1.151769     | (Hartree/Particle) |
| Thermal correction to Energy=                |           | 1.223123     |                    |
| Thermal correction to Enthalpy=              |           | 1.224067     |                    |
| Thermal correction to Gibbs Free Energy=     |           | 1.039527     |                    |
| Sum of electronic and zero-point Energies=   |           | -2961.713836 |                    |
| Sum of electronic and thermal Energies=      |           | -2961.642482 |                    |
| Sum of electronic and thermal Enthalpies=    |           | -2961.641538 |                    |
| Sum of electronic and thermal Free Energies= |           | -2961.826079 |                    |

|               |          |           |            |
|---------------|----------|-----------|------------|
| Item          | Value    | Threshold | Converged? |
| Maximum Force | 0.000003 | 0.000450  | YES        |

RMS Force 0.000000 0.000300 YES

SCF= -2962.86560557 Hartree

**The transition state (9) leading to minor (propargyl) isomer:** Dissymmetric N-Aryl *iso*-propyl is oriented syn to biaryl mesityl group (both pointing to the rear) with the phosphinoylimine approaching from back side of the complex and the terminal allene carbon side pointing to the front.

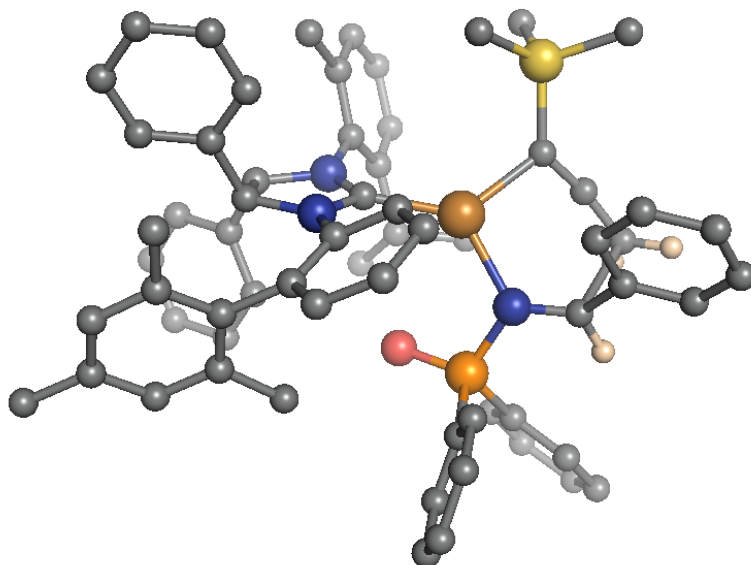

-----  
 Cartesian coordinates (Angstroms):  
 -----

|    |        |       |        |
|----|--------|-------|--------|
| H  | -1.163 | 2.553 | -3.904 |
| C  | -4.080 | 3.824 | -3.367 |
| C  | -1.036 | 3.399 | -3.215 |
| C  | -2.921 | 2.176 | -1.070 |
| Si | -2.603 | 3.659 | -2.177 |
| H  | -0.813 | 4.292 | -3.815 |
| C  | -3.979 | 1.778 | -0.466 |
| H  | -0.169 | 3.190 | -2.577 |
| C  | -2.459 | 5.260 | -1.166 |
| H  | -2.278 | 6.119 | -1.828 |
| H  | -3.389 | 5.447 | -0.612 |
| H  | -1.637 | 5.210 | -0.442 |
| C  | 2.993  | 0.647 | -0.295 |
| N  | 1.620  | 0.244 | -0.754 |
| C  | 2.671  | 1.724 | 0.796  |
| C  | 0.615  | 1.072 | -0.274 |
| N  | 1.208  | 1.991 | 0.550  |
| C  | -0.153 | 3.371 | 2.175  |
| C  | -0.478 | 4.666 | 2.647  |
| C  | 0.678  | 3.265 | 1.027  |
| C  | -0.005 | 5.824 | 2.020  |

|   |        |        |        |
|---|--------|--------|--------|
| C | 1.137  | 4.441  | 0.356  |
| C | 0.789  | 5.706  | 0.869  |
| C | 2.207  | -1.975 | -1.835 |
| C | 1.882  | -2.902 | -2.858 |
| C | 1.413  | -0.792 | -1.738 |
| C | 0.840  | -2.695 | -3.773 |
| C | 0.388  | -0.572 | -2.692 |
| C | 0.093  | -1.507 | -3.691 |
| C | -0.743 | 2.176  | 2.925  |
| C | 6.166  | 1.808  | -2.093 |
| C | 5.285  | 1.267  | -1.141 |
| C | 3.899  | 1.182  | -1.404 |
| C | 5.674  | 2.265  | -3.332 |
| C | 4.296  | 2.174  | -3.606 |
| C | 3.415  | 1.638  | -2.647 |
| C | 4.406  | 1.453  | 4.204  |
| C | 4.034  | 1.897  | 2.920  |
| C | 2.984  | 1.269  | 2.217  |
| C | 3.727  | 0.370  | 4.796  |
| C | 2.669  | -0.251 | 4.100  |
| C | 2.294  | 0.194  | 2.821  |
| H | 3.484  | -0.201 | 0.182  |
| H | 3.240  | 2.634  | 0.595  |
| H | -1.110 | 4.760  | 3.526  |
| H | -0.263 | 6.805  | 2.411  |
| C | 1.990  | 4.400  | -0.899 |
| H | 1.138  | 6.598  | 0.353  |
| H | 2.474  | -3.811 | -2.921 |
| H | -0.697 | -1.300 | -4.409 |
| H | 7.230  | 1.866  | -1.874 |
| H | 5.676  | 0.901  | -0.193 |
| H | 6.354  | 2.680  | -4.073 |
| H | 3.905  | 2.518  | -4.561 |
| H | 2.357  | 1.567  | -2.878 |
| H | 5.216  | 1.946  | 4.736  |
| H | 4.564  | 2.732  | 2.466  |
| H | 4.011  | 0.022  | 5.786  |
| H | 2.130  | -1.077 | 4.559  |
| H | 1.452  | -0.277 | 2.320  |
| H | 1.783  | 3.523  | -1.514 |
| H | 3.064  | 4.387  | -0.665 |
| H | 1.806  | 5.292  | -1.507 |
| C | -0.254 | 2.136  | 4.397  |
| H | -0.438 | 1.247  | 2.439  |
| C | -2.293 | 2.237  | 2.880  |
| H | 0.840  | 2.106  | 4.456  |
| H | -0.642 | 1.238  | 4.897  |
| H | -0.606 | 3.011  | 4.961  |
| H | -2.675 | 3.124  | 3.403  |
| H | -2.722 | 1.354  | 3.365  |
| H | -2.654 | 2.269  | 1.846  |
| H | 6.027  | -1.652 | -3.104 |
| H | 4.691  | -2.667 | -3.667 |
| C | 4.965  | -1.874 | -2.957 |
| H | 6.799  | -2.655 | -1.154 |
| H | 4.389  | -0.985 | -3.233 |
| H | 7.676  | -3.878 | 0.823  |
| C | 5.798  | -2.705 | -0.729 |
| C | 4.702  | -2.306 | -1.523 |
| C | 6.830  | -3.557 | 1.442  |
| C | 5.634  | -3.168 | 0.591  |
| C | 3.389  | -2.351 | -0.973 |
| H | 6.582  | -4.373 | 2.132  |
| H | 7.174  | -2.709 | 2.052  |
| C | 4.322  | -3.257 | 1.099  |

|    |        |        |        |
|----|--------|--------|--------|
| C  | 3.200  | -2.869 | 0.338  |
| H  | 4.164  | -3.646 | 2.103  |
| C  | 1.811  | -3.069 | 0.907  |
| H  | 1.222  | -3.739 | 0.269  |
| H  | 1.241  | -2.139 | 0.994  |
| H  | 1.860  | -3.516 | 1.907  |
| H  | -0.158 | 0.365  | -2.656 |
| H  | 0.627  | -3.436 | -4.539 |
| C  | -4.994 | 1.113  | 0.177  |
| H  | -5.672 | -1.167 | -5.445 |
| H  | -3.289 | -0.584 | -4.989 |
| C  | -5.306 | -1.126 | -4.422 |
| C  | -3.961 | -0.798 | -4.161 |
| H  | -7.212 | -1.678 | -3.539 |
| C  | -6.175 | -1.413 | -3.345 |
| C  | -3.484 | -0.752 | -2.839 |
| C  | -5.701 | -1.357 | -2.026 |
| H  | -2.445 | -0.526 | -2.633 |
| C  | -4.350 | -1.020 | -1.753 |
| H  | -6.375 | -1.577 | -1.199 |
| C  | -3.877 | -1.015 | -0.355 |
| H  | -1.778 | -2.954 | -1.344 |
| N  | -2.567 | -0.896 | -0.035 |
| H  | -4.585 | -1.433 | 0.363  |
| H  | -1.306 | -5.259 | -2.162 |
| C  | -1.621 | -3.761 | -0.635 |
| C  | -1.351 | -5.064 | -1.094 |
| P  | -1.994 | -1.773 | 1.394  |
| C  | -1.682 | -3.501 | 0.748  |
| C  | -1.135 | -6.109 | -0.175 |
| C  | -3.319 | -2.014 | 2.703  |
| H  | -4.523 | -3.446 | 1.588  |
| C  | -4.420 | -2.877 | 2.508  |
| C  | -3.168 | -1.336 | 3.929  |
| C  | -1.458 | -4.547 | 1.670  |
| C  | -1.188 | -5.848 | 1.210  |
| C  | -5.377 | -3.036 | 3.528  |
| C  | -4.121 | -1.504 | 4.950  |
| H  | -6.224 | -3.700 | 3.373  |
| H  | -1.497 | -4.354 | 2.740  |
| H  | -1.020 | -6.650 | 1.924  |
| O  | -0.699 | -1.058 | 2.045  |
| Cu | -1.376 | 0.805  | -0.514 |
| H  | -5.970 | -2.475 | 5.536  |
| C  | -5.232 | -2.347 | 4.748  |
| H  | -3.996 | -0.984 | 5.897  |
| H  | -2.294 | -0.711 | 4.085  |
| H  | -0.927 | -7.115 | -0.532 |
| H  | -3.931 | 4.661  | -4.064 |
| H  | -5.009 | 4.003  | -2.810 |
| H  | -4.214 | 2.908  | -3.958 |
| H  | -5.860 | 0.771  | -0.381 |
| H  | -5.119 | 1.209  | 1.256  |

|                                            | 1         | 2       | 3                           |
|--------------------------------------------|-----------|---------|-----------------------------|
|                                            | A         | A       | A                           |
| Frequencies --                             | -205.6019 | 16.9471 | 20.7896                     |
| Red. masses --                             | 5.8882    | 5.0465  | 5.1847                      |
| Zero-point correction=                     |           |         | 1.151393 (Hartree/Particle) |
| Thermal correction to Energy=              |           |         | 1.222784                    |
| Thermal correction to Enthalpy=            |           |         | 1.223728                    |
| Thermal correction to Gibbs Free Energy=   |           |         | 1.040384                    |
| Sum of electronic and zero-point Energies= |           |         | -2961.696294                |
| Sum of electronic and thermal Energies=    |           |         | -2961.624903                |
| Sum of electronic and thermal Enthalpies=  |           |         | -2961.623959                |



Sum of electronic and thermal Free Energies= -2961.807302

| Item          | Value    | Threshold | Converged? |
|---------------|----------|-----------|------------|
| Maximum Force | 0.000062 | 0.000450  | YES        |
| RMS Force     | 0.000008 | 0.000300  | YES        |

SCF= -2962.84768686 Hartree

**The transition state (10) leading to minor (propargyl) isomer:** Dissymmetric N-Aryl methyl is oriented syn to biaryl mesityl group (both pointing to the rear) with the phosphinoylimine approaching from back side of the complex and the terminal allene carbon side pointing to the front.

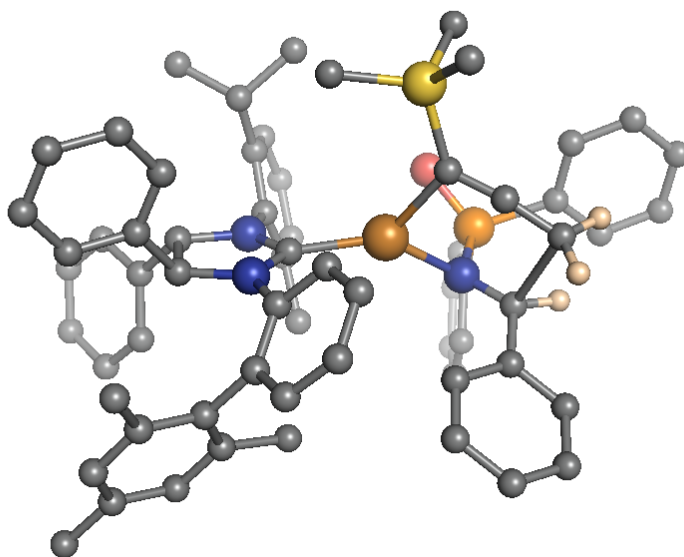

-----  
 Cartesian coordinates (Angstroms):  
 -----

|    |        |        |       |
|----|--------|--------|-------|
| H  | 3.145  | 0.748  | 4.037 |
| C  | 0.074  | -0.701 | 4.372 |
| C  | 3.133  | -0.188 | 4.606 |
| C  | 2.066  | -1.635 | 2.122 |
| Si | 1.797  | -1.382 | 3.969 |
| H  | 2.963  | 0.056  | 5.664 |
| C  | 2.899  | -2.426 | 1.552 |
| H  | 4.127  | -0.650 | 4.521 |
| C  | 1.990  | -3.045 | 4.876 |
| H  | 1.871  | -2.916 | 5.962 |
| H  | 1.238  | -3.770 | 4.537 |
| H  | 2.982  | -3.477 | 4.690 |
| C  | -3.237 | 0.292  | 0.594 |
| N  | -1.991 | -0.548 | 0.485 |
| C  | -2.664 | 1.744  | 0.643 |
| C  | -0.820 | 0.186  | 0.448 |
| N  | -1.174 | 1.505  | 0.467 |
| C  | -0.063 | 3.499  | 1.448 |

|   |        |        |        |
|---|--------|--------|--------|
| C | 0.632  | 4.710  | 1.235  |
| C | -0.309 | 2.662  | 0.329  |
| C | 1.087  | 5.072  | -0.040 |
| C | 0.174  | 2.998  | -0.966 |
| C | 0.872  | 4.210  | -1.129 |
| C | -2.927 | -2.681 | -0.477 |
| C | -2.904 | -4.098 | -0.448 |
| C | -2.054 | -1.989 | 0.413  |
| C | -2.056 | -4.822 | 0.405  |
| C | -1.211 | -2.721 | 1.276  |
| C | -1.197 | -4.123 | 1.272  |
| C | -0.436 | 3.107  | 2.881  |
| C | -6.332 | -0.041 | 2.829  |
| C | -5.505 | 0.143  | 1.705  |
| C | -4.107 | -0.018 | 1.807  |
| C | -5.768 | -0.400 | 4.069  |
| C | -4.372 | -0.569 | 4.175  |
| C | -3.549 | -0.376 | 3.052  |
| C | -4.208 | 4.952  | -0.794 |
| C | -3.620 | 4.022  | 0.085  |
| C | -3.288 | 2.721  | -0.349 |
| C | -4.477 | 4.588  | -2.127 |
| C | -4.156 | 3.289  | -2.568 |
| C | -3.569 | 2.365  | -1.686 |
| H | -3.839 | 0.157  | -0.306 |
| H | -2.806 | 2.157  | 1.647  |
| H | 0.830  | 5.367  | 2.079  |
| H | 1.618  | 6.010  | -0.184 |
| C | -0.012 | 2.082  | -2.159 |
| H | 1.247  | 4.476  | -2.114 |
| H | -3.562 | -4.634 | -1.127 |
| H | -0.528 | -4.657 | 1.941  |
| H | -7.407 | 0.088  | 2.737  |
| H | -5.949 | 0.410  | 0.748  |
| H | -6.405 | -0.547 | 4.938  |
| H | -3.929 | -0.850 | 5.128  |
| H | -2.475 | -0.505 | 3.145  |
| H | -4.456 | 5.949  | -0.439 |
| H | -3.426 | 4.313  | 1.114  |
| H | -4.932 | 5.302  | -2.809 |
| H | -4.366 | 2.995  | -3.593 |
| H | -3.347 | 1.366  | -2.050 |
| H | -1.062 | 1.809  | -2.305 |
| H | 0.553  | 1.152  | -2.029 |
| H | 0.345  | 2.568  | -3.073 |
| C | 0.852  | 2.907  | 3.723  |
| H | -0.957 | 2.143  | 2.854  |
| C | -1.369 | 4.136  | 3.570  |
| H | 1.530  | 2.197  | 3.237  |
| H | 0.601  | 2.527  | 4.722  |
| H | 1.391  | 3.855  | 3.848  |
| H | -0.887 | 5.119  | 3.648  |
| H | -1.614 | 3.802  | 4.586  |
| H | -2.311 | 4.269  | 3.022  |
| H | -6.913 | -2.622 | 0.090  |
| H | -5.846 | -3.998 | -0.224 |
| C | -5.868 | -2.911 | -0.067 |
| H | -7.241 | -1.710 | -2.039 |
| H | -5.316 | -2.710 | 0.857  |
| H | -6.254 | -0.286 | -5.357 |
| C | -6.169 | -1.616 | -2.206 |
| C | -5.282 | -2.171 | -1.260 |
| C | -6.684 | -0.335 | -4.350 |
| C | -5.711 | -0.951 | -3.361 |
| C | -3.877 | -2.041 | -1.457 |

|    |        |        |        |
|----|--------|--------|--------|
| H  | -6.947 | 0.691  | -4.055 |
| H  | -7.617 | -0.908 | -4.403 |
| C  | -4.318 | -0.864 | -3.558 |
| C  | -3.396 | -1.397 | -2.632 |
| H  | -3.938 | -0.378 | -4.456 |
| C  | -1.913 | -1.312 | -2.949 |
| H  | -1.497 | -2.306 | -3.153 |
| H  | -1.332 | -0.889 | -2.124 |
| H  | -1.740 | -0.693 | -3.836 |
| H  | -0.553 | -2.180 | 1.943  |
| H  | -2.063 | -5.908 | 0.388  |
| C  | 3.770  | -3.095 | 0.727  |
| H  | 0.812  | -5.812 | -3.787 |
| H  | -0.518 | -4.290 | -2.321 |
| C  | 1.299  | -4.991 | -3.266 |
| C  | 0.548  | -4.125 | -2.446 |
| H  | 3.277  | -5.443 | -4.038 |
| C  | 2.688  | -4.785 | -3.404 |
| C  | 1.170  | -3.061 | -1.769 |
| C  | 3.312  | -3.731 | -2.716 |
| H  | 0.585  | -2.404 | -1.134 |
| C  | 2.564  | -2.856 | -1.886 |
| H  | 4.386  | -3.584 | -2.815 |
| C  | 3.294  | -1.782 | -1.176 |
| H  | 3.018  | 0.133  | -3.263 |
| N  | 2.715  | -0.631 | -0.753 |
| H  | 4.371  | -1.799 | -1.359 |
| H  | 3.277  | 1.408  | -5.386 |
| C  | 3.483  | 1.114  | -3.251 |
| C  | 3.625  | 1.840  | -4.450 |
| P  | 3.787  | 0.746  | -0.419 |
| C  | 3.933  | 1.667  | -2.037 |
| C  | 4.210  | 3.121  | -4.436 |
| C  | 5.516  | 0.148  | -0.015 |
| H  | 6.292  | 0.210  | -2.045 |
| C  | 6.510  | -0.009 | -1.003 |
| C  | 5.816  | -0.120 | 1.337  |
| C  | 4.514  | 2.953  | -2.021 |
| C  | 4.653  | 3.678  | -3.219 |
| C  | 7.801  | -0.440 | -0.638 |
| C  | 7.106  | -0.546 | 1.699  |
| H  | 8.566  | -0.560 | -1.401 |
| H  | 4.850  | 3.389  | -1.083 |
| H  | 5.100  | 4.668  | -3.203 |
| O  | 3.213  | 1.664  | 0.778  |
| Cu | 1.084  | -0.497 | 0.501  |
| H  | 9.098  | -1.036 | 0.993  |
| C  | 8.100  | -0.708 | 0.712  |
| H  | 7.336  | -0.749 | 2.742  |
| H  | 5.048  | 0.009  | 2.095  |
| H  | 4.318  | 3.681  | -5.362 |
| H  | 0.037  | -0.365 | 5.418  |
| H  | -0.693 | -1.476 | 4.247  |
| H  | -0.183 | 0.151  | 3.734  |
| H  | 4.830  | -2.845 | 0.762  |
| H  | 3.525  | -4.087 | 0.353  |

|                                 | 1         | 2        | 3                  |
|---------------------------------|-----------|----------|--------------------|
|                                 | A         | A        | A                  |
| Frequencies --                  | -197.3564 | 12.9980  | 21.0781            |
| Red. masses --                  | 8.7551    | 5.2331   | 5.2458             |
| Zero-point correction=          |           | 1.152391 | (Hartree/Particle) |
| Thermal correction to Energy=   |           | 1.223383 |                    |
| Thermal correction to Enthalpy= |           | 1.224327 |                    |

Thermal correction to Gibbs Free Energy= 1.042022  
 Sum of electronic and zero-point Energies= -2961.709427  
 Sum of electronic and thermal Energies= -2961.638435  
 Sum of electronic and thermal Enthalpies= -2961.637491  
 Sum of electronic and thermal Free Energies= -2961.819796

|         | Item  | Value    | Threshold | Converged? |
|---------|-------|----------|-----------|------------|
| Maximum | Force | 0.000006 | 0.000450  | YES        |
| RMS     | Force | 0.000001 | 0.000300  | YES        |

SCF= -2962.86181801 Hartree

**The transition state (11) leading to major (silyllallene) isomer:** Dissymmetric N-Aryl *iso*-propyl is oriented syn to biaryl mesityl group (both pointing to the rear) with the phosphinoylimine approaching from front side of the complex and the propargyl group pointing to the back.

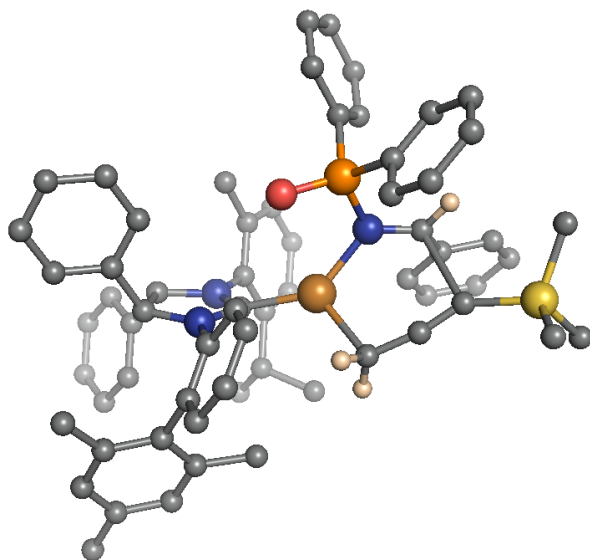

-----  
 Cartesian coordinates (Angstroms):  
 -----

|    |        |        |        |
|----|--------|--------|--------|
| H  | 4.723  | -2.390 | -4.949 |
| C  | 5.798  | 0.724  | -4.562 |
| C  | 5.503  | -2.341 | -4.179 |
| C  | 1.191  | -0.718 | -2.520 |
| Si | 5.480  | -0.656 | -3.294 |
| H  | 6.475  | -2.513 | -4.664 |
| C  | 2.569  | -0.611 | -2.625 |
| H  | 5.329  | -3.159 | -3.467 |
| C  | 6.872  | -0.650 | -2.000 |
| H  | 7.832  | -0.880 | -2.483 |
| H  | 6.976  | 0.324  | -1.505 |
| H  | 6.694  | -1.406 | -1.224 |
| C  | -3.206 | -0.852 | 1.077  |
| N  | -2.040 | -1.022 | 0.141  |
| C  | -3.099 | 0.661  | 1.480  |
| C  | -1.232 | 0.081  | 0.063  |
| N  | -1.843 | 1.090  | 0.749  |

|   |        |        |        |
|---|--------|--------|--------|
| C | -1.459 | 3.401  | -0.082 |
| C | -0.906 | 4.683  | 0.142  |
| C | -1.288 | 2.415  | 0.926  |
| C | -0.223 | 4.984  | 1.329  |
| C | -0.591 | 2.702  | 2.133  |
| C | -0.068 | 3.997  | 2.318  |
| C | -2.703 | -2.810 | -1.469 |
| C | -2.409 | -4.067 | -2.048 |
| C | -1.788 | -2.287 | -0.516 |
| C | -1.244 | -4.780 | -1.718 |
| C | -0.619 | -3.000 | -0.179 |
| C | -0.342 | -4.237 | -0.784 |
| C | -2.200 | 3.130  | -1.395 |
| C | -4.338 | -3.099 | 3.973  |
| C | -4.347 | -2.305 | 2.810  |
| C | -3.147 | -1.780 | 2.288  |
| C | -3.120 | -3.382 | 4.622  |
| C | -1.917 | -2.867 | 4.098  |
| C | -1.926 | -2.069 | 2.940  |
| C | -5.928 | 3.204  | 1.964  |
| C | -4.777 | 2.421  | 2.175  |
| C | -4.335 | 1.505  | 1.196  |
| C | -6.656 | 3.076  | 0.766  |
| C | -6.221 | 2.163  | -0.217 |
| C | -5.069 | 1.386  | -0.005 |
| H | -4.138 | -1.032 | 0.537  |
| H | -2.892 | 0.732  | 2.552  |
| H | -1.018 | 5.452  | -0.617 |
| H | 0.193  | 5.977  | 1.482  |
| C | -0.381 | 1.651  | 3.208  |
| H | 0.473  | 4.224  | 3.234  |
| H | -3.100 | -4.474 | -2.783 |
| H | 0.563  | -4.777 | -0.516 |
| H | -5.271 | -3.496 | 4.366  |
| H | -5.292 | -2.089 | 2.315  |
| H | -3.108 | -3.999 | 5.517  |
| H | -0.972 | -3.088 | 4.588  |
| H | -0.984 | -1.692 | 2.548  |
| H | -6.255 | 3.903  | 2.730  |
| H | -4.225 | 2.517  | 3.108  |
| H | -7.548 | 3.675  | 0.600  |
| H | -6.776 | 2.059  | -1.146 |
| H | -4.752 | 0.692  | -0.779 |
| H | -0.102 | 0.684  | 2.779  |
| H | -1.286 | 1.499  | 3.812  |
| H | 0.417  | 1.960  | 3.891  |
| C | -3.325 | 4.167  | -1.646 |
| H | -2.669 | 2.144  | -1.324 |
| C | -1.223 | 3.098  | -2.600 |
| H | -4.029 | 4.202  | -0.806 |
| H | -3.888 | 3.899  | -2.550 |
| H | -2.918 | 5.175  | -1.796 |
| H | -0.727 | 4.068  | -2.732 |
| H | -1.771 | 2.872  | -3.525 |
| H | -0.448 | 2.334  | -2.467 |
| H | -6.418 | -3.736 | -0.183 |
| H | -5.229 | -4.669 | -1.105 |
| C | -5.402 | -3.714 | -0.592 |
| H | -7.356 | -2.244 | -1.739 |
| H | -4.695 | -3.676 | 0.245  |
| H | -8.142 | 0.257  | -2.722 |
| C | -6.374 | -1.900 | -2.059 |
| C | -5.228 | -2.541 | -1.544 |
| C | -7.532 | -0.173 | -3.529 |
| C | -6.281 | -0.837 | -2.981 |

|    |        |        |        |
|----|--------|--------|--------|
| C  | -3.938 | -2.092 | -1.944 |
| H  | -8.166 | -0.896 | -4.059 |
| H  | -7.284 | 0.632  | -4.229 |
| C  | -4.997 | -0.422 | -3.384 |
| C  | -3.824 | -1.032 | -2.885 |
| H  | -4.900 | 0.385  | -4.108 |
| C  | -2.471 | -0.572 | -3.396 |
| H  | -1.912 | -1.402 | -3.847 |
| H  | -1.846 | -0.174 | -2.589 |
| H  | -2.586 | 0.211  | -4.154 |
| H  | 0.069  | -2.579 | 0.552  |
| H  | -1.043 | -5.740 | -2.187 |
| C  | 3.816  | -0.412 | -2.501 |
| H  | 0.764  | -1.709 | -2.344 |
| H  | 0.581  | -0.077 | -3.161 |
| H  | 3.731  | 5.761  | -2.570 |
| H  | 1.551  | 4.756  | -1.879 |
| C  | 3.701  | 4.764  | -2.138 |
| C  | 2.472  | 4.194  | -1.752 |
| H  | 5.850  | 4.472  | -2.222 |
| C  | 4.894  | 4.035  | -1.943 |
| C  | 2.427  | 2.908  | -1.186 |
| C  | 4.849  | 2.748  | -1.387 |
| H  | 1.479  | 2.493  | -0.857 |
| C  | 3.614  | 2.157  | -1.012 |
| H  | 5.773  | 2.195  | -1.237 |
| C  | 3.617  | 0.817  | -0.392 |
| H  | 3.406  | 2.077  | 2.024  |
| N  | 2.520  | 0.327  | 0.236  |
| H  | 4.604  | 0.411  | -0.161 |
| H  | 4.033  | 3.335  | 4.072  |
| C  | 3.494  | 1.553  | 2.971  |
| C  | 3.841  | 2.267  | 4.134  |
| P  | 2.747  | -0.832 | 1.550  |
| C  | 3.245  | 0.169  | 3.044  |
| C  | 3.932  | 1.602  | 5.372  |
| C  | 4.160  | -2.004 | 1.199  |
| H  | 5.665  | -0.935 | 2.348  |
| C  | 5.451  | -1.802 | 1.728  |
| C  | 3.895  | -3.137 | 0.401  |
| C  | 3.328  | -0.497 | 4.287  |
| C  | 3.672  | 0.219  | 5.448  |
| C  | 6.473  | -2.735 | 1.465  |
| C  | 4.916  | -4.066 | 0.138  |
| H  | 7.466  | -2.579 | 1.877  |
| H  | 3.123  | -1.563 | 4.352  |
| H  | 3.735  | -0.298 | 6.402  |
| O  | 1.378  | -1.655 | 1.811  |
| Cu | 0.665  | 0.085  | -0.554 |
| H  | 6.995  | -4.590 | 0.472  |
| C  | 6.207  | -3.868 | 0.672  |
| H  | 4.708  | -4.939 | -0.475 |
| H  | 2.898  | -3.297 | -0.002 |
| H  | 4.199  | 2.156  | 6.269  |
| H  | 6.794  | 0.612  | -5.013 |
| H  | 5.743  | 1.713  | -4.092 |
| H  | 5.053  | 0.692  | -5.369 |

|                                 | 1         | 2       | 3                           |
|---------------------------------|-----------|---------|-----------------------------|
|                                 | A         | A       | A                           |
| Frequencies --                  | -135.8461 | 13.2334 | 15.8561                     |
| Red. masses --                  | 8.2687    | 5.5720  | 4.9003                      |
| Zero-point correction=          |           |         | 1.150757 (Hartree/Particle) |
| Thermal correction to Energy=   |           |         | 1.222537                    |
| Thermal correction to Enthalpy= |           |         | 1.223481                    |

Thermal correction to Gibbs Free Energy= 1.037034  
 Sum of electronic and zero-point Energies= -2961.721658  
 Sum of electronic and thermal Energies= -2961.649878  
 Sum of electronic and thermal Enthalpies= -2961.648934  
 Sum of electronic and thermal Free Energies= -2961.835380

| Item          | Value    | Threshold | Converged? |
|---------------|----------|-----------|------------|
| Maximum Force | 0.000001 | 0.000450  | YES        |
| RMS Force     | 0.000000 | 0.000300  | YES        |

SCF= -2962.87241495 Hartree

**The transition state (12) leading to major (silyllallene) isomer:** Dissymmetric N-Aryl *iso*-propyl is oriented syn to biaryl mesityl group (both pointing to the rear) with the phosphinoylimine approaching from back side of the complex and the propargyl group pointing to the front.

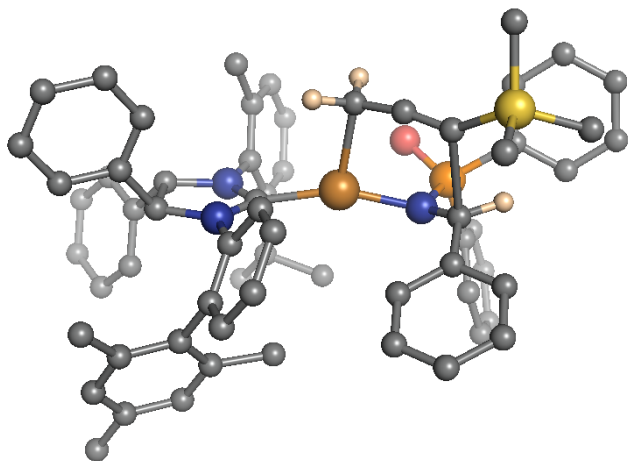

-----  
 Cartesian coordinates (Angstroms):  
 -----

|    |        |        |        |
|----|--------|--------|--------|
| H  | -4.680 | -4.039 | -3.647 |
| C  | -4.678 | -4.888 | -0.444 |
| C  | -5.547 | -3.608 | -3.127 |
| C  | -1.645 | -0.882 | -2.341 |
| Si | -5.138 | -3.255 | -1.301 |
| H  | -6.382 | -4.318 | -3.210 |
| C  | -2.728 | -1.595 | -1.857 |
| H  | -5.832 | -2.686 | -3.652 |
| C  | -6.685 | -2.520 | -0.480 |
| H  | -7.542 | -3.192 | -0.630 |
| H  | -6.556 | -2.385 | 0.601  |
| H  | -6.941 | -1.544 | -0.913 |
| C  | 3.475  | -0.746 | -1.045 |
| N  | 2.093  | -0.998 | -0.497 |
| C  | 3.348  | 0.698  | -1.626 |
| C  | 1.223  | 0.054  | -0.669 |
| N  | 1.929  | 1.072  | -1.246 |
| C  | 1.331  | 3.438  | -0.768 |

|   |        |        |        |
|---|--------|--------|--------|
| C | 0.880  | 4.683  | -1.259 |
| C | 1.401  | 2.351  | -1.679 |
| C | 0.523  | 4.852  | -2.604 |
| C | 1.028  | 2.500  | -3.044 |
| C | 0.594  | 3.763  | -3.490 |
| C | 2.464  | -2.686 | 1.312  |
| C | 2.155  | -3.970 | 1.820  |
| C | 1.782  | -2.258 | 0.138  |
| C | 1.206  | -4.806 | 1.209  |
| C | 0.826  | -3.097 | -0.471 |
| C | 0.530  | -4.362 | 0.059  |
| C | 1.678  | 3.298  | 0.717  |
| C | 5.747  | -3.039 | -3.119 |
| C | 5.273  | -2.179 | -2.109 |
| C | 3.929  | -1.753 | -2.098 |
| C | 4.874  | -3.492 | -4.126 |
| C | 3.527  | -3.074 | -4.118 |
| C | 3.061  | -2.208 | -3.114 |
| C | 6.018  | 3.446  | -1.755 |
| C | 5.006  | 2.540  | -2.125 |
| C | 4.421  | 1.679  | -1.172 |
| C | 6.463  | 3.497  | -0.420 |
| C | 5.884  | 2.640  | 0.538  |
| C | 4.870  | 1.741  | 0.166  |
| H | 4.191  | -0.760 | -0.220 |
| H | 3.387  | 0.650  | -2.719 |
| H | 0.806  | 5.529  | -0.580 |
| H | 0.180  | 5.821  | -2.960 |
| C | 1.064  | 1.341  | -4.024 |
| H | 0.296  | 3.886  | -4.528 |
| H | 2.666  | -4.307 | 2.719  |
| H | -0.214 | -4.990 | -0.424 |
| H | 6.787  | -3.355 | -3.116 |
| H | 5.955  | -1.831 | -1.336 |
| H | 5.235  | -4.160 | -4.904 |
| H | 2.846  | -3.421 | -4.891 |
| H | 2.022  | -1.890 | -3.125 |
| H | 6.458  | 4.102  | -2.503 |
| H | 4.674  | 2.501  | -3.161 |
| H | 7.248  | 4.191  | -0.131 |
| H | 6.219  | 2.676  | 1.571  |
| H | 4.437  | 1.095  | 0.925  |
| H | 0.677  | 0.421  | -3.576 |
| H | 2.083  | 1.133  | -4.381 |
| H | 0.455  | 1.570  | -4.905 |
| C | 2.595  | 4.439  | 1.226  |
| H | 2.218  | 2.356  | 0.853  |
| C | 0.386  | 3.224  | 1.572  |
| H | 3.506  | 4.521  | 0.623  |
| H | 2.890  | 4.242  | 2.265  |
| H | 2.082  | 5.409  | 1.210  |
| H | -0.215 | 4.135  | 1.459  |
| H | 0.641  | 3.111  | 2.635  |
| H | -0.234 | 2.371  | 1.277  |
| H | 6.413  | -3.477 | 1.150  |
| H | 5.095  | -4.419 | 1.859  |
| C | 5.327  | -3.504 | 1.298  |
| H | 6.846  | -1.824 | 2.749  |
| H | 4.851  | -3.606 | 0.317  |
| H | 7.247  | 0.817  | 3.629  |
| C | 5.802  | -1.514 | 2.769  |
| C | 4.855  | -2.267 | 2.046  |
| C | 6.477  | 0.409  | 4.298  |
| C | 5.436  | -0.380 | 3.524  |
| C | 3.488  | -1.863 | 2.049  |



|    |        |        |        |
|----|--------|--------|--------|
| H  | 6.993  | -0.227 | 5.030  |
| H  | 6.023  | 1.246  | 4.840  |
| C  | 4.076  | -0.015 | 3.542  |
| C  | 3.096  | -0.736 | 2.825  |
| H  | 3.764  | 0.843  | 4.136  |
| C  | 1.642  | -0.318 | 2.952  |
| H  | 1.030  | -1.135 | 3.353  |
| H  | 1.205  | -0.034 | 1.988  |
| H  | 1.542  | 0.537  | 3.628  |
| H  | 0.324  | -2.757 | -1.369 |
| H  | 0.993  | -5.785 | 1.630  |
| C  | -3.698 | -2.081 | -1.195 |
| H  | -1.841 | 0.014  | -2.933 |
| H  | -0.745 | -1.426 | -2.629 |
| H  | -2.153 | -4.361 | 4.596  |
| H  | -0.322 | -3.178 | 3.381  |
| C  | -2.390 | -3.641 | 3.816  |
| C  | -1.359 | -2.969 | 3.131  |
| H  | -4.541 | -3.871 | 4.009  |
| C  | -3.734 | -3.368 | 3.482  |
| C  | -1.656 | -2.037 | 2.122  |
| C  | -4.031 | -2.437 | 2.474  |
| H  | -0.852 | -1.522 | 1.606  |
| C  | -2.999 | -1.759 | 1.773  |
| H  | -5.069 | -2.219 | 2.236  |
| C  | -3.386 | -0.731 | 0.784  |
| H  | -2.946 | 1.197  | 2.850  |
| N  | -2.553 | 0.275  | 0.408  |
| H  | -4.462 | -0.581 | 0.700  |
| H  | -3.046 | 2.626  | 4.887  |
| C  | -3.144 | 2.261  | 2.756  |
| C  | -3.193 | 3.072  | 3.906  |
| P  | -3.293 | 1.815  | -0.079 |
| C  | -3.334 | 2.834  | 1.484  |
| C  | -3.426 | 4.456  | 3.786  |
| C  | -5.086 | 1.589  | -0.573 |
| H  | -5.923 | 1.778  | 1.424  |
| C  | -6.136 | 1.638  | 0.367  |
| C  | -5.375 | 1.428  | -1.944 |
| C  | -3.560 | 4.222  | 1.361  |
| C  | -3.606 | 5.031  | 2.512  |
| C  | -7.472 | 1.527  | -0.064 |
| C  | -6.710 | 1.319  | -2.373 |
| H  | -8.279 | 1.568  | 0.663  |
| H  | -3.691 | 4.669  | 0.379  |
| H  | -3.780 | 6.100  | 2.415  |
| O  | -2.476 | 2.540  | -1.266 |
| Cu | -0.764 | 0.039  | -0.465 |
| H  | -8.792 | 1.289  | -1.767 |
| C  | -7.760 | 1.369  | -1.434 |
| H  | -6.930 | 1.201  | -3.431 |
| H  | -4.564 | 1.407  | -2.667 |
| H  | -3.461 | 5.081  | 4.675  |
| H  | -5.527 | -5.586 | -0.461 |
| H  | -4.393 | -4.720 | 0.602  |
| H  | -3.832 | -5.370 | -0.951 |

|                                          | 1         | 2      | 3                           |
|------------------------------------------|-----------|--------|-----------------------------|
|                                          | A         | A      | A                           |
| Frequencies --                           | -158.1630 | 8.9485 | 13.0116                     |
| Red. masses --                           | 8.7582    | 5.3646 | 5.4891                      |
| Zero-point correction=                   |           |        | 1.151285 (Hartree/Particle) |
| Thermal correction to Energy=            |           |        | 1.222794                    |
| Thermal correction to Enthalpy=          |           |        | 1.223739                    |
| Thermal correction to Gibbs Free Energy= |           |        | 1.038002                    |

Sum of electronic and zero-point Energies= -2961.713074  
 Sum of electronic and thermal Energies= -2961.641564  
 Sum of electronic and thermal Enthalpies= -2961.640620  
 Sum of electronic and thermal Free Energies= -2961.826357

| Item          | Value    | Threshold | Converged? |
|---------------|----------|-----------|------------|
| Maximum Force | 0.000005 | 0.000450  | YES        |
| RMS Force     | 0.000000 | 0.000300  | YES        |

SCF= -2962.86435875 Hartree

**The transition state (13) leading to major (silyllallene) isomer:** Dissymmetric N-Aryl methyl is oriented syn to biaryl mesityl group (both pointing to the rear) with the phosphinoylimine approaching from back side of the complex and the propargyl group pointing to the front.

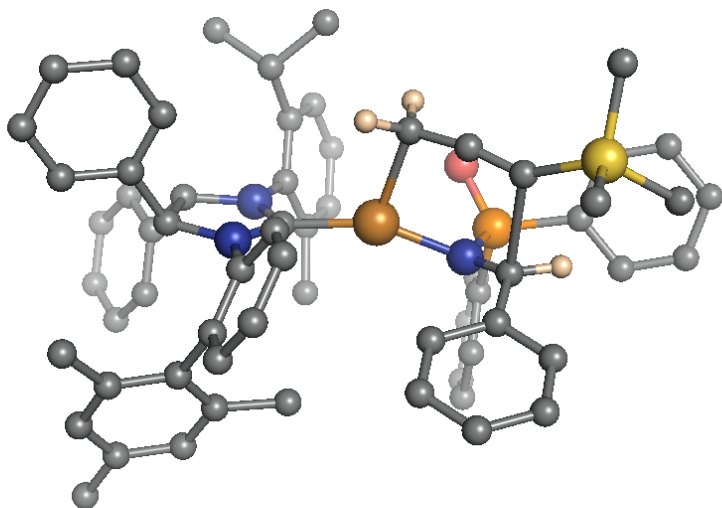

-----  
 Cartesian coordinates (Angstroms):  
 -----

|    |        |        |        |
|----|--------|--------|--------|
| H  | 5.060  | 2.505  | -4.731 |
| C  | 5.222  | 4.306  | -1.953 |
| C  | 5.872  | 2.148  | -4.083 |
| C  | 1.596  | 0.447  | -2.541 |
| Si | 5.455  | 2.442  | -2.249 |
| H  | 6.792  | 2.679  | -4.365 |
| C  | 2.803  | 1.079  | -2.292 |
| H  | 6.020  | 1.079  | -4.285 |
| C  | 6.910  | 1.816  | -1.199 |
| H  | 7.845  | 2.279  | -1.545 |
| H  | 6.788  | 2.067  | -0.138 |
| H  | 7.021  | 0.727  | -1.280 |
| C  | -3.547 | 0.522  | -0.849 |
| N  | -2.135 | 0.939  | -0.524 |
| C  | -3.424 | -1.033 | -0.954 |
| C  | -1.232 | -0.099 | -0.522 |
| N  | -1.939 | -1.249 | -0.728 |

|   |        |        |        |
|---|--------|--------|--------|
| C | -1.288 | -3.263 | -2.027 |
| C | -0.894 | -4.620 | -2.024 |
| C | -1.410 | -2.599 | -0.778 |
| C | -0.616 | -5.293 | -0.826 |
| C | -1.103 | -3.257 | 0.444  |
| C | -0.711 | -4.609 | 0.398  |
| C | -2.379 | 3.073  | 0.756  |
| C | -2.085 | 4.455  | 0.830  |
| C | -1.819 | 2.334  | -0.322 |
| C | -1.258 | 5.093  | -0.109 |
| C | -0.987 | 2.976  | -1.263 |
| C | -0.697 | 4.344  | -1.160 |
| C | -1.531 | -2.569 | -3.372 |
| C | -5.992 | 2.075  | -3.367 |
| C | -5.437 | 1.570  | -2.175 |
| C | -4.093 | 1.147  | -2.130 |
| C | -5.201 | 2.170  | -4.529 |
| C | -3.855 | 1.752  | -4.490 |
| C | -3.308 | 1.242  | -3.300 |
| C | -5.858 | -3.725 | 0.294  |
| C | -4.998 | -2.970 | -0.525 |
| C | -4.337 | -1.828 | -0.025 |
| C | -6.071 | -3.343 | 1.632  |
| C | -5.418 | -2.202 | 2.139  |
| C | -4.558 | -1.451 | 1.319  |
| H | -4.201 | 0.797  | -0.020 |
| H | -3.645 | -1.345 | -1.979 |
| H | -0.793 | -5.148 | -2.968 |
| H | -0.316 | -6.338 | -0.844 |
| C | -1.146 | -2.539 | 1.779  |
| H | -0.476 | -5.122 | 1.327  |
| H | -2.509 | 5.031  | 1.650  |
| H | -0.052 | 4.817  | -1.895 |
| H | -7.031 | 2.395  | -3.388 |
| H | -6.056 | 1.496  | -1.284 |
| H | -5.626 | 2.564  | -5.449 |
| H | -3.238 | 1.825  | -5.382 |
| H | -2.269 | 0.923  | -3.285 |
| H | -6.359 | -4.602 | -0.110 |
| H | -4.845 | -3.271 | -1.559 |
| H | -6.736 | -3.922 | 2.268  |
| H | -5.577 | -1.897 | 3.171  |
| H | -4.069 | -0.575 | 1.736  |
| H | -2.067 | -1.964 | 1.906  |
| H | -0.308 | -1.837 | 1.869  |
| H | -1.070 | -3.256 | 2.603  |
| C | -0.268 | -2.637 | -4.273 |
| H | -1.735 | -1.509 | -3.184 |
| C | -2.747 | -3.168 | -4.129 |
| H | 0.615  | -2.261 | -3.747 |
| H | -0.418 | -2.034 | -5.179 |
| H | -0.058 | -3.667 | -4.587 |
| H | -2.576 | -4.226 | -4.368 |
| H | -2.910 | -2.631 | -5.072 |
| H | -3.671 | -3.105 | -3.540 |
| H | -6.370 | 3.607  | 0.834  |
| H | -5.071 | 4.785  | 1.071  |
| C | -5.281 | 3.731  | 0.843  |
| H | -6.505 | 2.541  | 2.926  |
| H | -4.906 | 3.549  | -0.169 |
| H | -6.708 | 0.483  | 4.645  |
| C | -5.445 | 2.294  | 2.909  |
| C | -4.642 | 2.812  | 1.873  |
| C | -5.795 | 0.946  | 5.042  |
| C | -4.913 | 1.475  | 3.926  |

|    |        |        |        |
|----|--------|--------|--------|
| C  | -3.257 | 2.480  | 1.827  |
| H  | -6.111 | 1.755  | 5.715  |
| H  | -5.270 | 0.198  | 5.648  |
| C  | -3.536 | 1.181  | 3.881  |
| C  | -2.698 | 1.672  | 2.855  |
| H  | -3.098 | 0.565  | 4.664  |
| C  | -1.213 | 1.362  | 2.908  |
| H  | -0.618 | 2.283  | 2.960  |
| H  | -0.873 | 0.814  | 2.022  |
| H  | -0.974 | 0.757  | 3.789  |
| H  | -0.583 | 2.397  | -2.085 |
| H  | -1.051 | 6.156  | -0.019 |
| C  | 3.879  | 1.556  | -1.814 |
| H  | 1.634  | -0.575 | -2.920 |
| H  | 0.764  | 1.041  | -2.919 |
| H  | 2.652  | 5.603  | 2.869  |
| H  | 0.713  | 4.335  | 1.934  |
| C  | 2.810  | 4.649  | 2.372  |
| C  | 1.717  | 3.930  | 1.848  |
| H  | 4.963  | 4.657  | 2.655  |
| C  | 4.111  | 4.117  | 2.247  |
| C  | 1.914  | 2.695  | 1.206  |
| C  | 4.308  | 2.886  | 1.602  |
| H  | 1.063  | 2.153  | 0.806  |
| C  | 3.214  | 2.155  | 1.067  |
| H  | 5.312  | 2.477  | 1.522  |
| C  | 3.490  | 0.841  | 0.452  |
| H  | 2.557  | -0.649 | 2.968  |
| N  | 2.560  | -0.144 | 0.373  |
| H  | 4.545  | 0.568  | 0.441  |
| H  | 2.092  | -1.692 | 5.185  |
| C  | 2.514  | -1.731 | 3.062  |
| C  | 2.244  | -2.321 | 4.312  |
| P  | 3.131  | -1.826 | 0.261  |
| C  | 2.712  | -2.545 | 1.930  |
| C  | 2.167  | -3.724 | 4.429  |
| C  | 5.001  | -1.897 | 0.138  |
| H  | 5.421  | -1.556 | 2.245  |
| C  | 5.841  | -1.749 | 1.261  |
| C  | 5.557  | -2.173 | -1.128 |
| C  | 2.628  | -3.948 | 2.043  |
| C  | 2.356  | -4.536 | 3.292  |
| C  | 7.236  | -1.874 | 1.115  |
| C  | 6.951  | -2.302 | -1.270 |
| H  | 7.881  | -1.762 | 1.983  |
| H  | 2.764  | -4.571 | 1.162  |
| H  | 2.291  | -5.618 | 3.379  |
| O  | 2.478  | -2.663 | -0.954 |
| Cu | 0.757  | 0.000  | -0.503 |
| H  | 8.869  | -2.254 | -0.260 |
| C  | 7.792  | -2.152 | -0.150 |
| H  | 7.377  | -2.522 | -2.246 |
| H  | 4.900  | -2.304 | -1.984 |
| H  | 1.959  | -4.178 | 5.394  |
| H  | 6.151  | 4.852  | -2.166 |
| H  | 4.936  | 4.507  | -0.913 |
| H  | 4.434  | 4.709  | -2.604 |

|                               | 1         | 2        | 3                  |
|-------------------------------|-----------|----------|--------------------|
|                               | A         | A        | A                  |
| Frequencies --                | -163.5904 | 14.5621  | 15.8533            |
| Red. masses --                | 9.1172    | 5.4607   | 5.4756             |
| Zero-point correction=        |           | 1.151537 | (Hartree/Particle) |
| Thermal correction to Energy= |           | 1.222982 |                    |

Thermal correction to Enthalpy= 1.223926  
 Thermal correction to Gibbs Free Energy= 1.039777  
 Sum of electronic and zero-point Energies= -2961.714951  
 Sum of electronic and thermal Energies= -2961.643506  
 Sum of electronic and thermal Enthalpies= -2961.642562  
 Sum of electronic and thermal Free Energies= -2961.826711

| Item          | Value    | Threshold | Converged? |
|---------------|----------|-----------|------------|
| Maximum Force | 0.000000 | 0.000450  | YES        |
| RMS Force     | 0.000000 | 0.000300  | YES        |

SCF= -2962.86648802 Hartree

**The transition state (14) leading to major (silyllallene) isomer:** Dissymmetric N-Aryl methyl is oriented syn to biaryl mesityl group (both pointing to the rear) with the phosphinoylimine approaching from front side of the complex and the propargyl group pointing to the back.

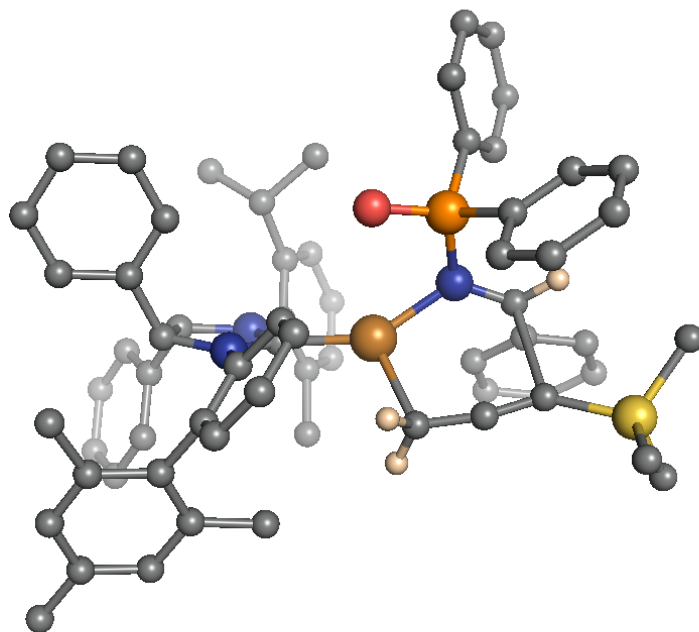

-----  
 Cartesian coordinates (Angstroms):  
 -----

|    |        |        |        |
|----|--------|--------|--------|
| H  | 4.401  | -5.284 | -2.092 |
| C  | 5.487  | -2.797 | -3.999 |
| C  | 5.239  | -4.763 | -1.611 |
| C  | 1.057  | -2.202 | -1.268 |
| Si | 5.275  | -2.927 | -2.114 |
| H  | 6.170  | -5.267 | -1.907 |
| C  | 2.422  | -2.282 | -1.493 |
| H  | 5.125  | -4.869 | -0.524 |
| C  | 6.762  | -2.108 | -1.259 |
| H  | 7.683  | -2.655 | -1.508 |
| H  | 6.901  | -1.067 | -1.576 |
| H  | 6.648  | -2.118 | -0.168 |
| C  | -3.441 | 0.159  | 0.973  |
| N  | -2.153 | -0.551 | 0.654  |

|   |        |        |        |
|---|--------|--------|--------|
| C | -3.326 | 1.471  | 0.125  |
| C | -1.268 | 0.213  | -0.069 |
| N | -1.914 | 1.364  | -0.416 |
| C | -0.993 | 3.663  | -0.540 |
| C | -0.562 | 4.746  | -1.339 |
| C | -1.360 | 2.455  | -1.192 |
| C | -0.490 | 4.637  | -2.734 |
| C | -1.269 | 2.318  | -2.604 |
| C | -0.833 | 3.425  | -3.359 |
| C | -2.703 | -2.974 | 0.975  |
| C | -2.348 | -4.205 | 1.578  |
| C | -1.858 | -1.854 | 1.209  |
| C | -1.197 | -4.343 | 2.370  |
| C | -0.705 | -1.987 | 2.011  |
| C | -0.369 | -3.225 | 2.581  |
| C | -1.015 | 3.825  | 0.983  |
| C | -5.125 | 0.830  | 4.355  |
| C | -4.917 | 0.473  | 3.009  |
| C | -3.616 | 0.455  | 2.462  |
| C | -4.028 | 1.163  | 5.174  |
| C | -2.726 | 1.139  | 4.635  |
| C | -2.520 | 0.790  | 3.288  |
| C | -5.945 | 3.190  | -2.091 |
| C | -4.951 | 2.961  | -1.121 |
| C | -4.400 | 1.674  | -0.939 |
| C | -6.406 | 2.128  | -2.892 |
| C | -5.864 | 0.838  | -2.714 |
| C | -4.870 | 0.615  | -1.746 |
| H | -4.286 | -0.440 | 0.629  |
| H | -3.358 | 2.337  | 0.793  |
| H | -0.278 | 5.681  | -0.861 |
| H | -0.163 | 5.484  | -3.333 |
| C | -1.603 | 1.017  | -3.310 |
| H | -0.776 | 3.338  | -4.442 |
| H | -2.984 | -5.069 | 1.399  |
| H | 0.521  | -3.307 | 3.200  |
| H | -6.133 | 0.841  | 4.762  |
| H | -5.768 | 0.214  | 2.383  |
| H | -4.185 | 1.434  | 6.215  |
| H | -1.873 | 1.388  | 5.261  |
| H | -1.509 | 0.770  | 2.892  |
| H | -6.358 | 4.188  | -2.218 |
| H | -4.606 | 3.787  | -0.503 |
| H | -7.176 | 2.300  | -3.640 |
| H | -6.216 | 0.010  | -3.325 |
| H | -4.473 | -0.389 | -1.624 |
| H | -2.586 | 0.638  | -3.016 |
| H | -0.871 | 0.236  | -3.070 |
| H | -1.601 | 1.158  | -4.396 |
| C | 0.412  | 4.083  | 1.532  |
| H | -1.356 | 2.886  | 1.431  |
| C | -1.980 | 4.952  | 1.437  |
| H | 1.095  | 3.277  | 1.245  |
| H | 0.390  | 4.138  | 2.628  |
| H | 0.821  | 5.029  | 1.155  |
| H | -1.654 | 5.929  | 1.056  |
| H | -2.003 | 5.010  | 2.533  |
| H | -3.005 | 4.782  | 1.084  |
| H | -6.464 | -2.930 | 2.452  |
| H | -5.154 | -4.113 | 2.590  |
| C | -5.418 | -3.125 | 2.189  |
| H | -7.341 | -3.227 | 0.300  |
| H | -4.791 | -2.395 | 2.712  |
| H | -7.928 | -2.241 | -2.568 |
| C | -6.355 | -3.158 | -0.156 |

|    |        |        |        |
|----|--------|--------|--------|
| C  | -5.223 | -3.075 | 0.682  |
| C  | -7.478 | -3.237 | -2.441 |
| C  | -6.244 | -3.168 | -1.561 |
| C  | -3.928 | -2.972 | 0.098  |
| H  | -8.247 | -3.885 | -2.004 |
| H  | -7.237 | -3.618 | -3.441 |
| C  | -4.952 | -3.100 | -2.120 |
| C  | -3.795 | -3.000 | -1.318 |
| H  | -4.839 | -3.131 | -3.203 |
| C  | -2.432 | -2.956 | -1.984 |
| H  | -1.766 | -3.733 | -1.589 |
| H  | -1.932 | -1.996 | -1.811 |
| H  | -2.522 | -3.101 | -3.066 |
| H  | -0.061 | -1.127 | 2.186  |
| H  | -0.951 | -5.306 | 2.811  |
| C  | 3.675  | -2.128 | -1.611 |
| H  | 0.639  | -2.770 | -0.434 |
| H  | 0.403  | -2.141 | -2.141 |
| H  | 3.549  | 2.226  | -5.931 |
| H  | 1.426  | 2.067  | -4.623 |
| C  | 3.557  | 1.824  | -4.921 |
| C  | 2.360  | 1.727  | -4.184 |
| H  | 5.702  | 1.491  | -4.882 |
| C  | 4.769  | 1.405  | -4.330 |
| C  | 2.365  | 1.213  | -2.876 |
| C  | 4.773  | 0.880  | -3.030 |
| H  | 1.444  | 1.179  | -2.302 |
| C  | 3.570  | 0.760  | -2.285 |
| H  | 5.711  | 0.560  | -2.582 |
| C  | 3.623  | 0.227  | -0.911 |
| H  | 4.032  | 2.651  | 0.046  |
| N  | 2.578  | 0.357  | -0.058 |
| H  | 4.624  | 0.034  | -0.522 |
| H  | 5.036  | 4.821  | 0.704  |
| C  | 4.129  | 2.897  | 1.099  |
| C  | 4.692  | 4.133  | 1.472  |
| P  | 2.908  | 0.352  | 1.679  |
| C  | 3.679  | 2.002  | 2.089  |
| C  | 4.800  | 4.480  | 2.833  |
| C  | 4.176  | -0.948 | 2.124  |
| H  | 5.860  | 0.408  | 2.341  |
| C  | 5.517  | -0.621 | 2.406  |
| C  | 3.743  | -2.288 | 2.216  |
| C  | 3.778  | 2.353  | 3.453  |
| C  | 4.338  | 3.589  | 3.823  |
| C  | 6.423  | -1.631 | 2.786  |
| C  | 4.647  | -3.295 | 2.596  |
| H  | 7.456  | -1.375 | 3.007  |
| H  | 3.414  | 1.674  | 4.220  |
| H  | 4.412  | 3.856  | 4.875  |
| O  | 1.531  | 0.113  | 2.492  |
| Cu | 0.659  | -0.213 | -0.383 |
| H  | 6.687  | -3.746 | 3.181  |
| C  | 5.989  | -2.967 | 2.884  |
| H  | 4.310  | -4.325 | 2.667  |
| H  | 2.708  | -2.541 | 1.999  |
| H  | 5.233  | 5.435  | 3.119  |
| H  | 6.443  | -3.237 | -4.314 |
| H  | 5.466  | -1.750 | -4.327 |
| H  | 4.679  | -3.328 | -4.520 |

Frequencies -- 1  
A -130.2405

2  
A 13.3517

3  
A 15.0847

```

Red. masses --      8.2953                5.2883                5.1982
Zero-point correction=                1.151081 (Hartree/Particle)
Thermal correction to Energy=          1.222769
Thermal correction to Enthalpy=        1.223713
Thermal correction to Gibbs Free Energy= 1.037607
Sum of electronic and zero-point Energies= -2961.719465
Sum of electronic and thermal Energies=   -2961.647777
Sum of electronic and thermal Enthalpies= -2961.646833
Sum of electronic and thermal Free Energies= -2961.832940

```

```

      Item                Value      Threshold  Converged?
Maximum Force           0.000003      0.000450      YES
RMS Force              0.000000      0.000300      YES

```

SCF= -2962.87054641 Hartree

**Table S3.** Relative and Gibbs free energies (298 K, 1 atm) in kcal/mol for the NHC–Cu-allenyl to NHC–Cu-propargyl isomerization followed by addition to phosphinoylimine

| structure  | <b>A</b> | <b>B</b> | <b>C</b> | <b>8</b> | <b>11</b> |
|------------|----------|----------|----------|----------|-----------|
| $\Delta G$ | 0.0      | 14.8     | 2.0      | 32.9     | 27.0      |
| $\Delta E$ | 0.0      | 13.3     | -0.2     | 10.0     | 5.7       |



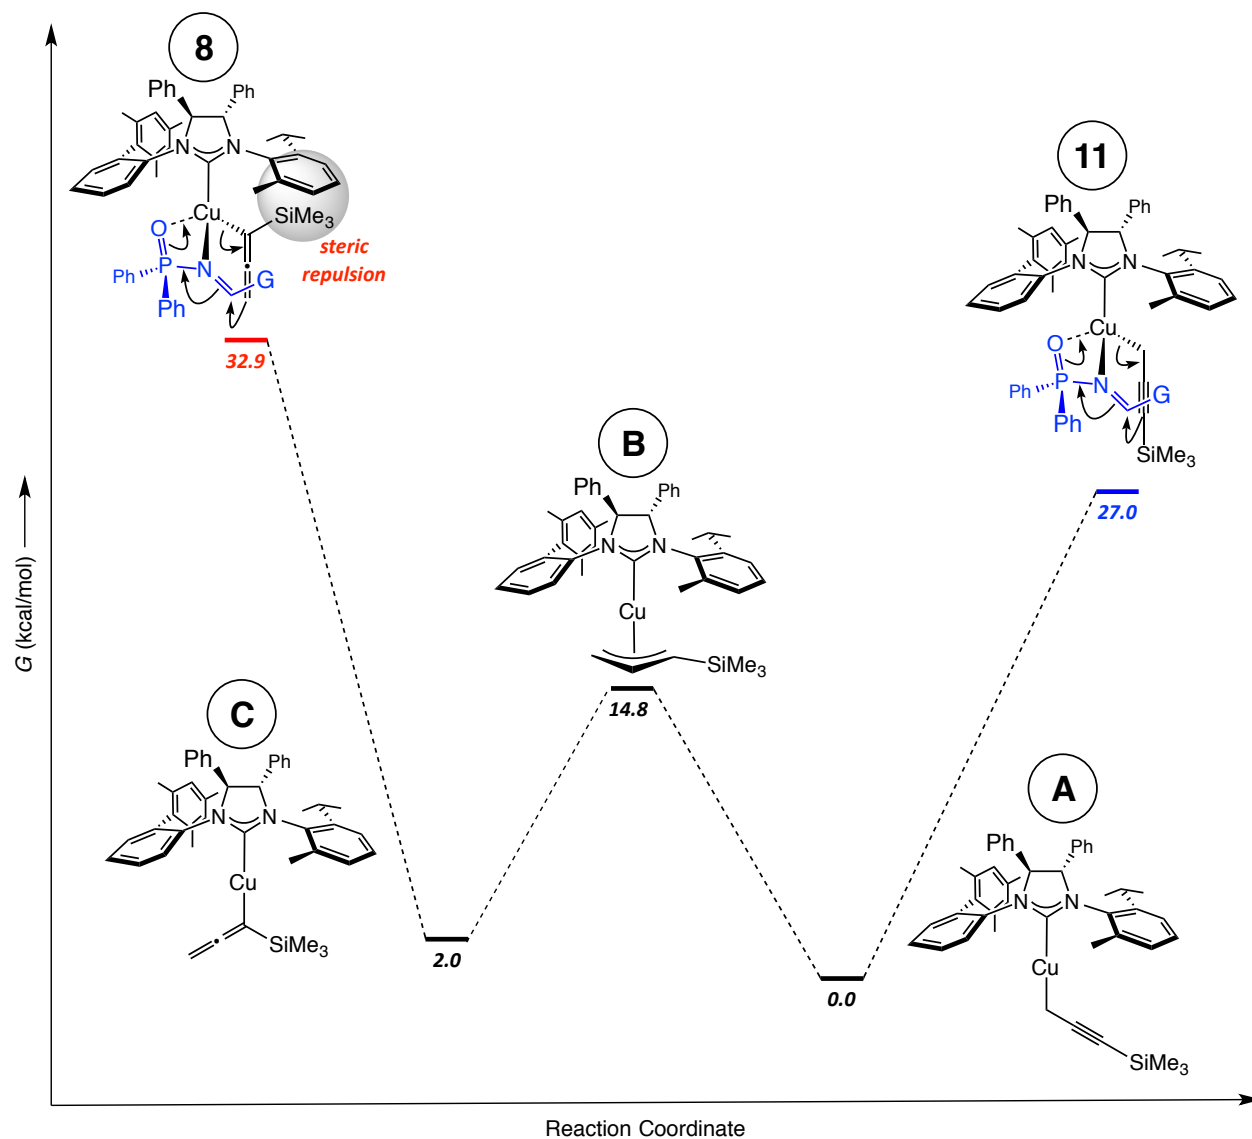

**Figure S3.** Relative Gibbs Free Energies (kcal/mol) Computed at 298 K and 1.0 atm.

**Table S4.** Relative and Gibbs free energies (298 K, 1 atm) in kcal/mol of the C–C bond forming transition states governing the Cu-allenyl and Cu-propargyl followed by addition to phosphinoylimine

| structure  | 7   | 8   | 9    | 10  | 11  | 12  | 13  | 14  |
|------------|-----|-----|------|-----|-----|-----|-----|-----|
| $\Delta G$ | 7.4 | 5.8 | 17.6 | 9.3 | 0.0 | 5.7 | 5.4 | 1.5 |
| $\Delta E$ | 6.4 | 4.3 | 15.5 | 6.7 | 0.0 | 5.1 | 3.7 | 1.2 |

**X-Ray Crystal Structure of Homoallenylamide 4b**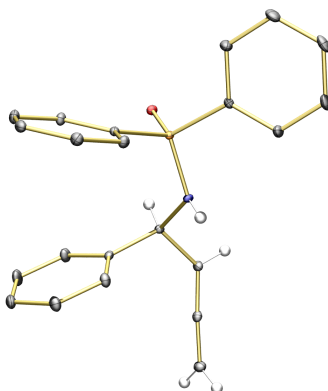**Table S5.** Crystal data and structure refinement for (*S*)-*P,P*-diphenyl-*N*-(1-phenylbuta-2,3-dien-1-yl)phosphinic amide

|                                 |                                    |                 |
|---------------------------------|------------------------------------|-----------------|
| Identification code             | C22H20NOP                          |                 |
| Empirical formula               | C22H20NOP                          |                 |
| Formula weight                  | 345.36                             |                 |
| Temperature                     | 100(2) K                           |                 |
| Wavelength                      | 0.71073 Å                          |                 |
| Crystal system                  | Monoclinic                         |                 |
| Space group                     | P 2(1)                             |                 |
| Unit cell dimensions            | a = 5.3586(5) Å                    | a = 90°.        |
|                                 | b = 15.5598(15) Å                  | b = 94.462(5)°. |
|                                 | c = 21.571(2) Å                    | g = 90°.        |
| Volume                          | 1793.1(3) Å <sup>3</sup>           |                 |
| Z                               | 4                                  |                 |
| Density (calculated)            | 1.279 Mg/m <sup>3</sup>            |                 |
| Absorption coefficient          | 0.162 mm <sup>-1</sup>             |                 |
| F(000)                          | 728                                |                 |
| Crystal size                    | 0.18 x 0.10 x 0.06 mm <sup>3</sup> |                 |
| Theta range for data collection | 1.62 to 30.00°.                    |                 |
| Index ranges                    | -7<=h<=7, -21<=k<=21, -30<=l<=30   |                 |
| Reflections collected           | 55440                              |                 |
| Independent reflections         | 10477 [R(int) = 0.0213]            |                 |
| Completeness to theta = 30.00°  | 99.9 %                             |                 |
| Absorption correction           | Semi-empirical from equivalents    |                 |
| Max. and min. transmission      | 0.9903 and 0.9714                  |                 |

|                                   |                                             |
|-----------------------------------|---------------------------------------------|
| Refinement method                 | Full-matrix least-squares on F <sup>2</sup> |
| Data / restraints / parameters    | 10477 / 39 / 616                            |
| Goodness-of-fit on F <sup>2</sup> | 1.066                                       |
| Final R indices [I>2sigma(I)]     | R1 = 0.0297, wR2 = 0.0785                   |
| R indices (all data)              | R1 = 0.0305, wR2 = 0.0791                   |
| Absolute structure parameter      | -0.02(4)                                    |
| Extinction coefficient            | na                                          |
| Largest diff. peak and hole       | 0.543 and -0.192 e.Å <sup>-3</sup>          |

**Table S6.** Atomic coordinates ( $\times 10^4$ ) and equivalent isotropic displacement parameters ( $\text{\AA}^2 \times 10^3$ ) for  $\text{C}_{22}\text{H}_{20}\text{NOP}$ .  $U(\text{eq})$  is defined as one third of the trace of the orthogonalized  $U^{ij}$  tensor

|       | x        | y        | z        | $U(\text{eq})$ |
|-------|----------|----------|----------|----------------|
| P(1)  | -313(1)  | 3275(1)  | -87(1)   | 12(1)          |
| O(1)  | -2909(1) | 2999(1)  | 16(1)    | 17(1)          |
| N(1)  | 1788(2)  | 2574(1)  | 202(1)   | 14(1)          |
| C(1)  | 294(2)   | 4332(1)  | 244(1)   | 14(1)          |
| C(2)  | 2349(2)  | 4818(1)  | 91(1)    | 18(1)          |
| C(3)  | 2801(2)  | 5626(1)  | 356(1)   | 21(1)          |
| C(4)  | 1226(2)  | 5948(1)  | 782(1)   | 20(1)          |
| C(5)  | -802(2)  | 5468(1)  | 944(1)   | 22(1)          |
| C(6)  | -1282(2) | 4664(1)  | 671(1)   | 19(1)          |
| C(7)  | 302(2)   | 3373(1)  | -893(1)  | 15(1)          |
| C(8)  | -1334(3) | 3886(1)  | -1267(1) | 24(1)          |
| C(9)  | -1015(3) | 3973(1)  | -1898(1) | 31(1)          |
| C(10) | 934(3)   | 3558(1)  | -2158(1) | 27(1)          |
| C(11) | 2575(3)  | 3053(1)  | -1789(1) | 28(1)          |
| C(12) | 2270(2)  | 2956(1)  | -1156(1) | 23(1)          |
| C(13) | 1370(2)  | 2120(1)  | 784(1)   | 14(1)          |
| C(14) | 2587(2)  | 1241(1)  | 755(1)   | 17(1)          |
| C(15) | 4492(2)  | 954(1)   | 1109(1)  | 18(1)          |
| C(16) | 6380(3)  | 613(1)   | 1435(1)  | 24(1)          |
| C(17) | 2183(2)  | 2629(1)  | 1366(1)  | 15(1)          |
| C(18) | 4360(2)  | 3120(1)  | 1401(1)  | 22(1)          |
| C(19) | 5032(3)  | 3614(1)  | 1926(1)  | 25(1)          |
| C(20) | 3543(3)  | 3620(1)  | 2421(1)  | 26(1)          |
| C(21) | 1403(3)  | 3125(1)  | 2395(1)  | 32(1)          |
| C(22) | 723(2)   | 2630(1)  | 1869(1)  | 26(1)          |
| P(2)  | 8265(1)  | 9080(1)  | 4015(1)  | 23(1)          |
| O(2)  | 10736(2) | 8762(1)  | 3843(1)  | 26(1)          |
| N(2)  | 5988(2)  | 8413(1)  | 3796(1)  | 26(1)          |
| C(23) | 7135(6)  | 10012(2) | 3540(2)  | 20(1)          |
| C(24) | 9009(5)  | 10561(2) | 3365(1)  | 27(1)          |
| C(25) | 8421(6)  | 11306(2) | 3019(1)  | 33(1)          |

|        |           |          |         |       |
|--------|-----------|----------|---------|-------|
| C(26)  | 5957(6)   | 11487(2) | 2844(2) | 35(1) |
| C(27)  | 4066(8)   | 10935(2) | 2990(2) | 37(1) |
| C(28)  | 4660(7)   | 10201(2) | 3337(1) | 31(1) |
| C(23X) | 7531(6)   | 10141(2) | 3765(2) | 21(1) |
| C(24X) | 8601(6)   | 10865(2) | 4058(2) | 33(1) |
| C(25X) | 8064(7)   | 11686(2) | 3822(2) | 43(1) |
| C(26X) | 6456(7)   | 11778(2) | 3287(2) | 41(1) |
| C(27X) | 5399(9)   | 11073(3) | 2992(2) | 37(1) |
| C(28X) | 5950(8)   | 10241(2) | 3227(2) | 31(1) |
| C(29)  | 8540(20)  | 9220(10) | 4860(3) | 24(1) |
| C(30)  | 10756(13) | 8982(4)  | 5257(3) | 33(1) |
| C(31)  | 10900(14) | 9106(3)  | 5895(2) | 40(1) |
| C(32)  | 8980(20)  | 9496(7)  | 6180(3) | 41(2) |
| C(33)  | 6855(10)  | 9754(5)  | 5833(3) | 40(1) |
| C(34)  | 6611(7)   | 9595(4)  | 5198(3) | 34(1) |
| C(29X) | 8270(20)  | 9344(10) | 4820(3) | 31(2) |
| C(30X) | 9987(13)  | 8913(5)  | 5190(2) | 40(1) |
| C(31X) | 10002(13) | 9089(6)  | 5825(3) | 68(2) |
| C(32X) | 8387(16)  | 9657(7)  | 6053(4) | 43(2) |
| C(33X) | 6683(10)  | 10068(4) | 5651(3) | 51(1) |
| C(34X) | 6600(8)   | 9903(4)  | 5024(3) | 39(1) |
| C(35)  | 6320(3)   | 7497(1)  | 3930(1) | 31(1) |
| C(36)  | 4433(8)   | 7344(3)  | 4473(2) | 27(1) |
| C(37)  | 5111(6)   | 7264(2)  | 5068(1) | 32(1) |
| C(38)  | 5720(8)   | 7234(3)  | 5646(2) | 45(1) |
| C(36X) | 5291(9)   | 7124(3)  | 4480(2) | 32(1) |
| C(37X) | 6619(6)   | 6859(2)  | 4940(1) | 34(1) |
| C(38X) | 8149(10)  | 6534(3)  | 5381(2) | 61(1) |
| C(39)  | 5608(2)   | 6944(1)  | 3363(1) | 25(1) |
| C(40)  | 7140(3)   | 6272(1)  | 3208(1) | 31(1) |
| C(41)  | 6484(3)   | 5754(1)  | 2701(1) | 34(1) |
| C(42)  | 4270(3)   | 5898(1)  | 2341(1) | 29(1) |
| C(43)  | 2731(3)   | 6573(1)  | 2492(1) | 28(1) |
| C(44)  | 3392(3)   | 7097(1)  | 3002(1) | 27(1) |

---

**Table S7.** Bond lengths [Å] and angles [°] for C<sub>22</sub>H<sub>20</sub>NOP

---

|             |            |
|-------------|------------|
| P(1)-O(1)   | 1.4887(8)  |
| P(1)-N(1)   | 1.6541(9)  |
| P(1)-C(7)   | 1.8005(10) |
| P(1)-C(1)   | 1.8133(11) |
| N(1)-C(13)  | 1.4743(13) |
| N(1)-H(1N)  | 0.871(13)  |
| C(1)-C(6)   | 1.3951(15) |
| C(1)-C(2)   | 1.3961(15) |
| C(2)-C(3)   | 1.3944(16) |
| C(2)-H(2)   | 0.9500     |
| C(3)-C(4)   | 1.3889(17) |
| C(3)-H(3)   | 0.9500     |
| C(4)-C(5)   | 1.3857(18) |
| C(4)-H(4)   | 0.9500     |
| C(5)-C(6)   | 1.3968(16) |
| C(5)-H(5)   | 0.9500     |
| C(6)-H(6)   | 0.9500     |
| C(7)-C(8)   | 1.3949(15) |
| C(7)-C(12)  | 1.3958(15) |
| C(8)-C(9)   | 1.3914(17) |
| C(8)-H(8)   | 0.9500     |
| C(9)-C(10)  | 1.384(2)   |
| C(9)-H(9)   | 0.9500     |
| C(10)-C(11) | 1.383(2)   |
| C(10)-H(10) | 0.9500     |
| C(11)-C(12) | 1.3962(16) |
| C(11)-H(11) | 0.9500     |
| C(12)-H(12) | 0.9500     |
| C(13)-C(14) | 1.5184(15) |
| C(13)-C(17) | 1.5194(15) |
| C(13)-H(13) | 1.0000     |
| C(14)-C(15) | 1.3048(16) |
| C(14)-H(14) | 0.9500     |
| C(15)-C(16) | 1.3003(16) |

|              |            |
|--------------|------------|
| C(16)-H(16A) | 0.931(14)  |
| C(16)-H(16B) | 0.932(14)  |
| C(17)-C(22)  | 1.3859(16) |
| C(17)-C(18)  | 1.3916(16) |
| C(18)-C(19)  | 1.3927(16) |
| C(18)-H(18)  | 0.9500     |
| C(19)-C(20)  | 1.3829(18) |
| C(19)-H(19)  | 0.9500     |
| C(20)-C(21)  | 1.379(2)   |
| C(20)-H(20)  | 0.9500     |
| C(21)-C(22)  | 1.3960(18) |
| C(21)-H(21)  | 0.9500     |
| C(22)-H(22)  | 0.9500     |
| P(2)-O(2)    | 1.4878(9)  |
| P(2)-N(2)    | 1.6421(12) |
| P(2)-C(29)   | 1.830(5)   |
| P(2)-C(23)   | 1.850(3)   |
| N(2)-C(35)   | 1.4630(18) |
| N(2)-H(2N)   | 0.904(14)  |
| C(23)-C(24)  | 1.393(4)   |
| C(23)-C(28)  | 1.396(5)   |
| C(24)-C(25)  | 1.401(4)   |
| C(24)-H(24)  | 0.9500     |
| C(25)-C(26)  | 1.374(5)   |
| C(25)-H(25)  | 0.9500     |
| C(26)-C(27)  | 1.384(5)   |
| C(26)-H(26)  | 0.9500     |
| C(27)-C(28)  | 1.388(4)   |
| C(27)-H(27)  | 0.9500     |
| C(28)-H(28)  | 0.9500     |
| C(29)-C(34)  | 1.434(8)   |
| C(29)-C(30)  | 1.458(9)   |
| C(30)-C(31)  | 1.386(7)   |
| C(30)-H(30)  | 0.9500     |
| C(31)-C(32)  | 1.380(10)  |
| C(31)-H(31)  | 0.9500     |

|                  |            |
|------------------|------------|
| C(32)-C(33)      | 1.373(8)   |
| C(32)-H(32)      | 0.9500     |
| C(33)-C(34)      | 1.389(6)   |
| C(33)-H(33)      | 0.9500     |
| C(34)-H(34)      | 0.9500     |
| C(35)-C(39)      | 1.520(2)   |
| C(35)-C(36)      | 1.623(4)   |
| C(35)-H(35)      | 0.88(2)    |
| C(36)-C(37)      | 1.313(4)   |
| C(36)-H(36)      | 0.9500     |
| C(37)-C(38)      | 1.263(5)   |
| C(38)-H(38A)     | 0.95(2)    |
| C(38)-H(38B)     | 0.96(2)    |
| C(39)-C(40)      | 1.386(2)   |
| C(39)-C(44)      | 1.3883(18) |
| C(40)-C(41)      | 1.383(2)   |
| C(40)-H(40)      | 0.9500     |
| C(41)-C(42)      | 1.385(2)   |
| C(41)-H(41)      | 0.9500     |
| C(42)-C(43)      | 1.390(2)   |
| C(42)-H(42)      | 0.9500     |
| C(43)-C(44)      | 1.393(2)   |
| C(43)-H(43)      | 0.9500     |
| C(44)-H(44)      | 0.9500     |
| O(1)-P(1)-N(1)   | 111.70(5)  |
| O(1)-P(1)-C(7)   | 114.31(5)  |
| N(1)-P(1)-C(7)   | 104.42(5)  |
| O(1)-P(1)-C(1)   | 110.15(5)  |
| N(1)-P(1)-C(1)   | 110.70(5)  |
| C(7)-P(1)-C(1)   | 105.27(5)  |
| C(13)-N(1)-P(1)  | 119.56(7)  |
| C(13)-N(1)-H(1N) | 113.9(10)  |
| P(1)-N(1)-H(1N)  | 117.5(11)  |
| C(6)-C(1)-C(2)   | 119.04(10) |
| C(6)-C(1)-P(1)   | 119.77(8)  |



|                   |            |
|-------------------|------------|
| C(2)-C(1)-P(1)    | 121.18(8)  |
| C(3)-C(2)-C(1)    | 120.35(10) |
| C(3)-C(2)-H(2)    | 119.8      |
| C(1)-C(2)-H(2)    | 119.8      |
| C(4)-C(3)-C(2)    | 120.13(11) |
| C(4)-C(3)-H(3)    | 119.9      |
| C(2)-C(3)-H(3)    | 119.9      |
| C(5)-C(4)-C(3)    | 120.01(11) |
| C(5)-C(4)-H(4)    | 120.0      |
| C(3)-C(4)-H(4)    | 120.0      |
| C(4)-C(5)-C(6)    | 119.96(11) |
| C(4)-C(5)-H(5)    | 120.0      |
| C(6)-C(5)-H(5)    | 120.0      |
| C(1)-C(6)-C(5)    | 120.50(11) |
| C(1)-C(6)-H(6)    | 119.7      |
| C(5)-C(6)-H(6)    | 119.7      |
| C(8)-C(7)-C(12)   | 119.46(10) |
| C(8)-C(7)-P(1)    | 116.89(9)  |
| C(12)-C(7)-P(1)   | 123.64(8)  |
| C(9)-C(8)-C(7)    | 120.11(12) |
| C(9)-C(8)-H(8)    | 119.9      |
| C(7)-C(8)-H(8)    | 119.9      |
| C(10)-C(9)-C(8)   | 120.33(12) |
| C(10)-C(9)-H(9)   | 119.8      |
| C(8)-C(9)-H(9)    | 119.8      |
| C(11)-C(10)-C(9)  | 119.90(11) |
| C(11)-C(10)-H(10) | 120.0      |
| C(9)-C(10)-H(10)  | 120.0      |
| C(10)-C(11)-C(12) | 120.40(12) |
| C(10)-C(11)-H(11) | 119.8      |
| C(12)-C(11)-H(11) | 119.8      |
| C(7)-C(12)-C(11)  | 119.80(11) |
| C(7)-C(12)-H(12)  | 120.1      |
| C(11)-C(12)-H(12) | 120.1      |
| N(1)-C(13)-C(14)  | 107.65(9)  |
| N(1)-C(13)-C(17)  | 113.66(8)  |

|                     |            |
|---------------------|------------|
| C(14)-C(13)-C(17)   | 114.01(9)  |
| N(1)-C(13)-H(13)    | 107.0      |
| C(14)-C(13)-H(13)   | 107.0      |
| C(17)-C(13)-H(13)   | 107.0      |
| C(15)-C(14)-C(13)   | 127.09(10) |
| C(15)-C(14)-H(14)   | 116.5      |
| C(13)-C(14)-H(14)   | 116.5      |
| C(16)-C(15)-C(14)   | 175.48(12) |
| C(15)-C(16)-H(16A)  | 123.3(12)  |
| C(15)-C(16)-H(16B)  | 119.3(12)  |
| H(16A)-C(16)-H(16B) | 117.4(16)  |
| C(22)-C(17)-C(18)   | 118.65(10) |
| C(22)-C(17)-C(13)   | 120.28(10) |
| C(18)-C(17)-C(13)   | 121.04(9)  |
| C(17)-C(18)-C(19)   | 120.60(11) |
| C(17)-C(18)-H(18)   | 119.7      |
| C(19)-C(18)-H(18)   | 119.7      |
| C(20)-C(19)-C(18)   | 120.27(12) |
| C(20)-C(19)-H(19)   | 119.9      |
| C(18)-C(19)-H(19)   | 119.9      |
| C(21)-C(20)-C(19)   | 119.49(11) |
| C(21)-C(20)-H(20)   | 120.3      |
| C(19)-C(20)-H(20)   | 120.3      |
| C(20)-C(21)-C(22)   | 120.36(12) |
| C(20)-C(21)-H(21)   | 119.8      |
| C(22)-C(21)-H(21)   | 119.8      |
| C(17)-C(22)-C(21)   | 120.60(12) |
| C(17)-C(22)-H(22)   | 119.7      |
| C(21)-C(22)-H(22)   | 119.7      |
| O(2)-P(2)-N(2)      | 111.96(6)  |
| O(2)-P(2)-C(29)     | 106.6(3)   |
| N(2)-P(2)-C(29)     | 111.2(6)   |
| O(2)-P(2)-C(23)     | 112.41(11) |
| N(2)-P(2)-C(23)     | 97.59(12)  |
| C(29)-P(2)-C(23)    | 117.0(5)   |
| C(35)-N(2)-P(2)     | 118.83(9)  |

|                   |           |
|-------------------|-----------|
| C(35)-N(2)-H(2N)  | 115.8(12) |
| P(2)-N(2)-H(2N)   | 115.8(12) |
| C(24)-C(23)-C(28) | 118.2(3)  |
| C(24)-C(23)-P(2)  | 114.8(2)  |
| C(28)-C(23)-P(2)  | 127.0(2)  |
| C(23)-C(24)-C(25) | 121.0(3)  |
| C(23)-C(24)-H(24) | 119.5     |
| C(25)-C(24)-H(24) | 119.5     |
| C(26)-C(25)-C(24) | 119.2(3)  |
| C(26)-C(25)-H(25) | 120.4     |
| C(24)-C(25)-H(25) | 120.4     |
| C(25)-C(26)-C(27) | 121.0(3)  |
| C(25)-C(26)-H(26) | 119.5     |
| C(27)-C(26)-H(26) | 119.5     |
| C(26)-C(27)-C(28) | 119.5(4)  |
| C(26)-C(27)-H(27) | 120.2     |
| C(28)-C(27)-H(27) | 120.2     |
| C(27)-C(28)-C(23) | 121.0(4)  |
| C(27)-C(28)-H(28) | 119.5     |
| C(23)-C(28)-H(28) | 119.5     |
| C(34)-C(29)-C(30) | 113.0(5)  |
| C(34)-C(29)-P(2)  | 123.4(6)  |
| C(30)-C(29)-P(2)  | 123.6(6)  |
| C(31)-C(30)-C(29) | 121.9(5)  |
| C(31)-C(30)-H(30) | 119.1     |
| C(29)-C(30)-H(30) | 119.1     |
| C(32)-C(31)-C(30) | 121.2(5)  |
| C(32)-C(31)-H(31) | 119.4     |
| C(30)-C(31)-H(31) | 119.4     |
| C(33)-C(32)-C(31) | 120.1(6)  |
| C(33)-C(32)-H(32) | 120.0     |
| C(31)-C(32)-H(32) | 120.0     |
| C(32)-C(33)-C(34) | 119.8(5)  |
| C(32)-C(33)-H(33) | 120.1     |
| C(34)-C(33)-H(33) | 120.1     |
| C(33)-C(34)-C(29) | 123.9(5)  |

|                     |            |
|---------------------|------------|
| C(33)-C(34)-H(34)   | 118.1      |
| C(29)-C(34)-H(34)   | 118.1      |
| N(2)-C(35)-C(39)    | 111.90(11) |
| N(2)-C(35)-C(36)    | 102.27(19) |
| C(39)-C(35)-C(36)   | 111.49(17) |
| N(2)-C(35)-H(35)    | 111.0(14)  |
| C(39)-C(35)-H(35)   | 97.7(14)   |
| C(36)-C(35)-H(35)   | 122.8(14)  |
| C(37)-C(36)-C(35)   | 125.4(3)   |
| C(37)-C(36)-H(36)   | 117.3      |
| C(35)-C(36)-H(36)   | 117.3      |
| C(38)-C(37)-C(36)   | 176.5(4)   |
| C(37)-C(38)-H(38A)  | 114(3)     |
| C(37)-C(38)-H(38B)  | 126(3)     |
| H(38A)-C(38)-H(38B) | 120(4)     |
| C(37)-C(38)-H(38D)  | 105.7(16)  |
| H(38A)-C(38)-H(38D) | 67(4)      |
| H(38B)-C(38)-H(38D) | 102(3)     |
| C(40)-C(39)-C(44)   | 119.41(13) |
| C(40)-C(39)-C(35)   | 120.26(12) |
| C(44)-C(39)-C(35)   | 120.31(13) |
| C(41)-C(40)-C(39)   | 120.77(13) |
| C(41)-C(40)-H(40)   | 119.6      |
| C(39)-C(40)-H(40)   | 119.6      |
| C(40)-C(41)-C(42)   | 120.24(14) |
| C(40)-C(41)-H(41)   | 119.9      |
| C(42)-C(41)-H(41)   | 119.9      |
| C(41)-C(42)-C(43)   | 119.21(14) |
| C(41)-C(42)-H(42)   | 120.4      |
| C(43)-C(42)-H(42)   | 120.4      |
| C(42)-C(43)-C(44)   | 120.62(13) |
| C(42)-C(43)-H(43)   | 119.7      |
| C(44)-C(43)-H(43)   | 119.7      |
| C(39)-C(44)-C(43)   | 119.74(13) |
| C(39)-C(44)-H(44)   | 120.1      |
| C(43)-C(44)-H(44)   | 120.1      |

---

Symmetry transformations used to generate equivalent atoms:

**Table S8.** Anisotropic displacement parameters ( $\text{\AA}^2 \times 10^3$ ) for  $\text{C}_{22}\text{H}_{20}\text{NOP}$ . The anisotropic displacement factor exponent takes the form:  $-2p^2 [ h^2 a^{*2}U^{11} + \dots + 2 h k a^* b^* U^{12} ]$

|       | $U^{11}$ | $U^{22}$ | $U^{33}$ | $U^{23}$ | $U^{13}$ | $U^{12}$ |
|-------|----------|----------|----------|----------|----------|----------|
| P(1)  | 11(1)    | 13(1)    | 12(1)    | 2(1)     | 2(1)     | 0(1)     |
| O(1)  | 12(1)    | 20(1)    | 18(1)    | 2(1)     | 3(1)     | -1(1)    |
| N(1)  | 11(1)    | 15(1)    | 15(1)    | 4(1)     | 3(1)     | 2(1)     |
| C(1)  | 15(1)    | 13(1)    | 13(1)    | 1(1)     | 2(1)     | 1(1)     |
| C(2)  | 15(1)    | 20(1)    | 20(1)    | -1(1)    | 4(1)     | -1(1)    |
| C(3)  | 20(1)    | 20(1)    | 23(1)    | -1(1)    | 2(1)     | -3(1)    |
| C(4)  | 24(1)    | 16(1)    | 20(1)    | -2(1)    | -2(1)    | 1(1)     |
| C(5)  | 27(1)    | 20(1)    | 21(1)    | -4(1)    | 8(1)     | 2(1)     |
| C(6)  | 21(1)    | 18(1)    | 19(1)    | 0(1)     | 7(1)     | 0(1)     |
| C(7)  | 16(1)    | 15(1)    | 13(1)    | 0(1)     | 1(1)     | -3(1)    |
| C(8)  | 29(1)    | 24(1)    | 18(1)    | 3(1)     | 0(1)     | 5(1)     |
| C(9)  | 44(1)    | 30(1)    | 18(1)    | 7(1)     | -4(1)    | 2(1)     |
| C(10) | 40(1)    | 28(1)    | 13(1)    | 0(1)     | 4(1)     | -14(1)   |
| C(11) | 28(1)    | 40(1)    | 18(1)    | -5(1)    | 9(1)     | -4(1)    |
| C(12) | 21(1)    | 33(1)    | 16(1)    | -1(1)    | 4(1)     | 4(1)     |
| C(13) | 14(1)    | 13(1)    | 15(1)    | 2(1)     | 2(1)     | 0(1)     |
| C(14) | 21(1)    | 12(1)    | 18(1)    | 0(1)     | 0(1)     | 0(1)     |
| C(15) | 22(1)    | 12(1)    | 19(1)    | 0(1)     | 4(1)     | 0(1)     |
| C(16) | 25(1)    | 20(1)    | 26(1)    | 1(1)     | -1(1)    | 3(1)     |
| C(17) | 17(1)    | 14(1)    | 16(1)    | 1(1)     | 3(1)     | 3(1)     |
| C(18) | 27(1)    | 21(1)    | 19(1)    | -2(1)    | 6(1)     | -6(1)    |
| C(19) | 30(1)    | 22(1)    | 22(1)    | -4(1)    | 4(1)     | -7(1)    |
| C(20) | 33(1)    | 26(1)    | 20(1)    | -7(1)    | 3(1)     | 2(1)     |
| C(21) | 30(1)    | 46(1)    | 22(1)    | -10(1)   | 12(1)    | -3(1)    |
| C(22) | 21(1)    | 35(1)    | 22(1)    | -5(1)    | 8(1)     | -4(1)    |
| P(2)  | 21(1)    | 17(1)    | 34(1)    | 0(1)     | 13(1)    | 0(1)     |
| O(2)  | 20(1)    | 25(1)    | 33(1)    | -5(1)    | 10(1)    | 0(1)     |
| N(2)  | 18(1)    | 29(1)    | 31(1)    | 4(1)     | 4(1)     | 0(1)     |
| C(23) | 23(1)    | 18(1)    | 18(1)    | -3(1)    | 4(1)     | -2(1)    |
| C(24) | 31(1)    | 25(1)    | 25(1)    | 1(1)     | 1(1)     | -6(1)    |
| C(25) | 46(2)    | 28(1)    | 26(1)    | 6(1)     | 3(1)     | -10(1)   |

|        |       |        |       |        |        |        |
|--------|-------|--------|-------|--------|--------|--------|
| C(26)  | 47(2) | 29(2)  | 29(1) | 7(1)   | 9(1)   | 3(1)   |
| C(27)  | 36(2) | 42(2)  | 32(2) | 5(1)   | 5(1)   | 4(2)   |
| C(28)  | 30(2) | 34(1)  | 28(1) | 6(1)   | 6(1)   | 4(1)   |
| C(23X) | 22(1) | 22(2)  | 20(2) | 1(1)   | 1(1)   | 1(1)   |
| C(24X) | 34(2) | 23(1)  | 42(2) | 7(1)   | -1(1)  | -4(1)  |
| C(25X) | 46(2) | 25(1)  | 59(2) | 13(1)  | 4(2)   | -3(1)  |
| C(26X) | 38(2) | 34(2)  | 53(2) | 22(2)  | 10(1)  | 7(1)   |
| C(27X) | 39(2) | 42(2)  | 30(2) | 18(2)  | 4(2)   | 8(2)   |
| C(28X) | 29(2) | 41(2)  | 25(1) | 4(1)   | 5(1)   | 8(1)   |
| C(29)  | 25(3) | 11(3)  | 37(2) | -7(2)  | 20(2)  | -3(2)  |
| C(30)  | 28(3) | 38(2)  | 32(2) | 2(1)   | -9(2)  | -4(2)  |
| C(31)  | 43(3) | 52(2)  | 22(2) | 4(1)   | -8(2)  | -6(2)  |
| C(32)  | 61(5) | 43(3)  | 18(2) | -6(2)  | 6(2)   | -29(3) |
| C(33)  | 55(3) | 40(3)  | 26(2) | -4(2)  | 20(2)  | -1(2)  |
| C(34)  | 37(2) | 37(2)  | 29(2) | 8(2)   | 11(1)  | 9(2)   |
| C(29X) | 30(3) | 21(5)  | 43(3) | -15(2) | 13(2)  | -8(2)  |
| C(30X) | 29(3) | 69(3)  | 22(2) | -3(2)  | 4(2)   | 15(3)  |
| C(31X) | 31(3) | 141(6) | 30(2) | 7(3)   | -4(2)  | 14(3)  |
| C(32X) | 52(4) | 54(4)  | 23(3) | -13(3) | 13(3)  | -27(3) |
| C(33X) | 97(3) | 27(2)  | 33(2) | 2(2)   | 36(2)  | 12(2)  |
| C(34X) | 58(2) | 34(2)  | 26(2) | -3(2)  | 17(2)  | 17(2)  |
| C(35)  | 32(1) | 26(1)  | 32(1) | 9(1)   | -11(1) | -8(1)  |
| C(36)  | 39(2) | 19(2)  | 22(1) | 8(1)   | -4(1)  | -2(1)  |
| C(37)  | 38(2) | 22(1)  | 35(2) | 4(1)   | 1(1)   | -2(1)  |
| C(38)  | 53(2) | 42(2)  | 40(2) | 2(1)   | 10(2)  | 0(2)   |
| C(36X) | 39(2) | 25(2)  | 30(2) | 7(1)   | -4(1)  | 3(1)   |
| C(37X) | 39(2) | 42(2)  | 21(1) | 4(1)   | 0(1)   | -5(1)  |
| C(38X) | 76(3) | 64(3)  | 41(2) | 18(2)  | -11(2) | 13(2)  |
| C(39)  | 24(1) | 27(1)  | 24(1) | 8(1)   | -1(1)  | -5(1)  |
| C(40)  | 22(1) | 31(1)  | 39(1) | 12(1)  | -4(1)  | 1(1)   |
| C(41)  | 31(1) | 30(1)  | 42(1) | 8(1)   | 4(1)   | 7(1)   |
| C(42)  | 32(1) | 30(1)  | 27(1) | 4(1)   | 2(1)   | 1(1)   |
| C(43)  | 25(1) | 36(1)  | 24(1) | 2(1)   | -1(1)  | 2(1)   |
| C(44)  | 24(1) | 34(1)  | 24(1) | 1(1)   | 1(1)   | 4(1)   |

---

**Table S9.** Hydrogen coordinates ( $\times 10^4$ ) and isotropic displacement parameters ( $\text{\AA}^2 \times 10^3$ ) for  $\text{C}_{22}\text{H}_{20}\text{NOP}$ 

|        | x        | y        | z       | U(eq) |
|--------|----------|----------|---------|-------|
| H(1N)  | 3360(20) | 2684(10) | 154(7)  | 16    |
| H(2)   | 3446     | 4596     | -195    | 22    |
| H(3)   | 4188     | 5956     | 245     | 25    |
| H(4)   | 1540     | 6498     | 963     | 24    |
| H(5)   | -1865    | 5684     | 1239    | 27    |
| H(6)   | -2692    | 4341     | 777     | 23    |
| H(8)   | -2669    | 4176     | -1090   | 29    |
| H(9)   | -2141    | 4320     | -2151   | 37    |
| H(10)  | 1145     | 3619     | -2589   | 32    |
| H(11)  | 3918     | 2771     | -1968   | 34    |
| H(12)  | 3397     | 2607     | -905    | 28    |
| H(13)  | -474     | 2023     | 787     | 17    |
| H(14)  | 1884     | 858      | 446     | 21    |
| H(16A) | 8040(30) | 686(13)  | 1343(8) | 29    |
| H(16B) | 6090(30) | 284(11)  | 1784(7) | 29    |
| H(18)  | 5396     | 3118     | 1063    | 26    |
| H(19)  | 6519     | 3948     | 1944    | 30    |
| H(20)  | 3992     | 3962     | 2777    | 31    |
| H(21)  | 386      | 3121     | 2737    | 39    |
| H(22)  | -755     | 2291     | 1856    | 31    |
| H(2N)  | 4420(30) | 8619(12) | 3817(8) | 31    |
| H(24)  | 10712    | 10428    | 3481    | 33    |
| H(25)  | 9710     | 11682    | 2908    | 40    |
| H(26)  | 5545     | 11999    | 2619    | 42    |
| H(27)  | 2375     | 11056    | 2854    | 44    |
| H(28)  | 3362     | 9822     | 3437    | 37    |
| H(24X) | 9707     | 10800    | 4421    | 40    |
| H(25X) | 8789     | 12178    | 4025    | 52    |
| H(26X) | 6088     | 12336    | 3125    | 49    |
| H(27X) | 4297     | 11142    | 2628    | 45    |
| H(28X) | 5242     | 9751     | 3018    | 38    |

|        |           |          |          |    |
|--------|-----------|----------|----------|----|
| H(30)  | 12143     | 8736     | 5073     | 40 |
| H(31)  | 12346     | 8918     | 6140     | 47 |
| H(32)  | 9129      | 9587     | 6617     | 49 |
| H(33)  | 5556      | 10039    | 6027     | 47 |
| H(34)  | 5075      | 9744     | 4974     | 41 |
| H(30X) | 11113     | 8514     | 5029     | 48 |
| H(31X) | 11179     | 8802     | 6105     | 81 |
| H(32X) | 8437      | 9768     | 6487     | 51 |
| H(33X) | 5551      | 10471    | 5805     | 61 |
| H(34X) | 5397      | 10174    | 4742     | 46 |
| H(35)  | 7920(40)  | 7361(14) | 3975(10) | 37 |
| H(36)  | 2695      | 7309     | 4350     | 32 |
| H(38A) | 5930(90)  | 6664(17) | 5800(20) | 54 |
| H(38B) | 5740(90)  | 7710(20) | 5927(19) | 54 |
| H(36X) | 3524      | 7084     | 4486     | 38 |
| H(38C) | 9030(90)  | 5990(20) | 5370(30) | 74 |
| H(38D) | 8560(100) | 6940(30) | 5710(20) | 74 |
| H(40)  | 8658      | 6167     | 3454     | 37 |
| H(41)  | 7557      | 5298     | 2599     | 41 |
| H(42)  | 3808      | 5539     | 1994     | 35 |
| H(43)  | 1214      | 6677     | 2246     | 34 |
| H(44)  | 2330      | 7557     | 3103     | 33 |

---



**Table S10.** Torsion angles [°] for C<sub>22</sub>H<sub>20</sub>NOP

|                        |             |
|------------------------|-------------|
| O(1)-P(1)-N(1)-C(13)   | -36.01(9)   |
| C(7)-P(1)-N(1)-C(13)   | -160.05(8)  |
| C(1)-P(1)-N(1)-C(13)   | 87.13(9)    |
| O(1)-P(1)-C(1)-C(6)    | 16.16(10)   |
| N(1)-P(1)-C(1)-C(6)    | -107.88(9)  |
| C(7)-P(1)-C(1)-C(6)    | 139.85(9)   |
| O(1)-P(1)-C(1)-C(2)    | -165.21(8)  |
| N(1)-P(1)-C(1)-C(2)    | 70.76(10)   |
| C(7)-P(1)-C(1)-C(2)    | -41.52(10)  |
| C(6)-C(1)-C(2)-C(3)    | -0.66(16)   |
| P(1)-C(1)-C(2)-C(3)    | -179.31(9)  |
| C(1)-C(2)-C(3)-C(4)    | 0.95(17)    |
| C(2)-C(3)-C(4)-C(5)    | -0.16(18)   |
| C(3)-C(4)-C(5)-C(6)    | -0.90(18)   |
| C(2)-C(1)-C(6)-C(5)    | -0.41(16)   |
| P(1)-C(1)-C(6)-C(5)    | 178.26(9)   |
| C(4)-C(5)-C(6)-C(1)    | 1.19(18)    |
| O(1)-P(1)-C(7)-C(8)    | 53.15(11)   |
| N(1)-P(1)-C(7)-C(8)    | 175.50(9)   |
| C(1)-P(1)-C(7)-C(8)    | -67.85(10)  |
| O(1)-P(1)-C(7)-C(12)   | -125.63(10) |
| N(1)-P(1)-C(7)-C(12)   | -3.28(11)   |
| C(1)-P(1)-C(7)-C(12)   | 113.37(10)  |
| C(12)-C(7)-C(8)-C(9)   | 0.55(18)    |
| P(1)-C(7)-C(8)-C(9)    | -178.29(10) |
| C(7)-C(8)-C(9)-C(10)   | -0.5(2)     |
| C(8)-C(9)-C(10)-C(11)  | 0.0(2)      |
| C(9)-C(10)-C(11)-C(12) | 0.3(2)      |
| C(8)-C(7)-C(12)-C(11)  | -0.20(18)   |
| P(1)-C(7)-C(12)-C(11)  | 178.55(10)  |
| C(10)-C(11)-C(12)-C(7) | -0.2(2)     |
| P(1)-N(1)-C(13)-C(14)  | 149.02(8)   |
| P(1)-N(1)-C(13)-C(17)  | -83.71(10)  |
| N(1)-C(13)-C(14)-C(15) | 114.57(13)  |

|                         |             |
|-------------------------|-------------|
| C(17)-C(13)-C(14)-C(15) | -12.49(17)  |
| N(1)-C(13)-C(17)-C(22)  | 138.94(11)  |
| C(14)-C(13)-C(17)-C(22) | -97.18(13)  |
| N(1)-C(13)-C(17)-C(18)  | -39.29(14)  |
| C(14)-C(13)-C(17)-C(18) | 84.59(13)   |
| C(22)-C(17)-C(18)-C(19) | -1.08(18)   |
| C(13)-C(17)-C(18)-C(19) | 177.18(11)  |
| C(17)-C(18)-C(19)-C(20) | 0.2(2)      |
| C(18)-C(19)-C(20)-C(21) | 0.7(2)      |
| C(19)-C(20)-C(21)-C(22) | -0.8(2)     |
| C(18)-C(17)-C(22)-C(21) | 1.00(19)    |
| C(13)-C(17)-C(22)-C(21) | -177.27(12) |
| C(20)-C(21)-C(22)-C(17) | -0.1(2)     |
| O(2)-P(2)-N(2)-C(35)    | 47.22(13)   |
| C(29)-P(2)-N(2)-C(35)   | -71.9(4)    |
| C(23)-P(2)-N(2)-C(35)   | 165.15(14)  |
| O(2)-P(2)-C(23)-C(24)   | -33.6(3)    |
| N(2)-P(2)-C(23)-C(24)   | -151.2(2)   |
| C(23X)-P(2)-C(23)-C(24) | 66.9(6)     |
| C(29X)-P(2)-C(23)-C(24) | 92.4(6)     |
| C(29)-P(2)-C(23)-C(24)  | 90.2(6)     |
| O(2)-P(2)-C(23)-C(28)   | 144.9(3)    |
| N(2)-P(2)-C(23)-C(28)   | 27.3(3)     |
| C(29)-P(2)-C(23)-C(28)  | -91.2(6)    |
| C(28)-C(23)-C(24)-C(25) | 3.1(5)      |
| P(2)-C(23)-C(24)-C(25)  | -178.2(2)   |
| C(23)-C(24)-C(25)-C(26) | -1.1(4)     |
| C(24)-C(25)-C(26)-C(27) | -1.6(5)     |
| C(25)-C(26)-C(27)-C(28) | 2.2(5)      |
| C(26)-C(27)-C(28)-C(23) | 0.0(5)      |
| C(24)-C(23)-C(28)-C(27) | -2.6(5)     |
| P(2)-C(23)-C(28)-C(27)  | 178.9(3)    |
| O(2)-P(2)-C(29)-C(34)   | 174.0(11)   |
| N(2)-P(2)-C(29)-C(34)   | -63.7(14)   |
| C(23)-P(2)-C(29)-C(34)  | 47.2(15)    |
| O(2)-P(2)-C(29)-C(30)   | -4.5(14)    |

|                         |             |
|-------------------------|-------------|
| N(2)-P(2)-C(29)-C(30)   | 117.8(12)   |
| C(23)-P(2)-C(29)-C(30)  | -131.3(11)  |
| C(34)-C(29)-C(30)-C(31) | 0.8(17)     |
| P(2)-C(29)-C(30)-C(31)  | 179.5(8)    |
| C(29)-C(30)-C(31)-C(32) | -2.9(13)    |
| C(30)-C(31)-C(32)-C(33) | 1.4(12)     |
| C(31)-C(32)-C(33)-C(34) | 2.1(12)     |
| C(32)-C(33)-C(34)-C(29) | -4.3(12)    |
| C(30)-C(29)-C(34)-C(33) | 2.7(17)     |
| P(2)-C(29)-C(34)-C(33)  | -175.9(7)   |
| P(2)-N(2)-C(35)-C(39)   | -131.93(11) |
| P(2)-N(2)-C(35)-C(36)   | 108.63(17)  |
| N(2)-C(35)-C(36)-C(37)  | -103.3(4)   |
| C(39)-C(35)-C(36)-C(37) | 137.0(3)    |
| N(2)-C(35)-C(39)-C(40)  | 134.84(14)  |
| C(36)-C(35)-C(39)-C(40) | -111.3(2)   |
| N(2)-C(35)-C(39)-C(44)  | -46.53(18)  |
| C(36)-C(35)-C(39)-C(44) | 67.3(2)     |
| C(44)-C(39)-C(40)-C(41) | 0.0(2)      |
| C(35)-C(39)-C(40)-C(41) | 178.60(13)  |
| C(39)-C(40)-C(41)-C(42) | -0.4(2)     |
| C(40)-C(41)-C(42)-C(43) | 0.6(2)      |
| C(41)-C(42)-C(43)-C(44) | -0.4(2)     |
| C(40)-C(39)-C(44)-C(43) | 0.2(2)      |
| C(35)-C(39)-C(44)-C(43) | -178.42(13) |
| C(42)-C(43)-C(44)-C(39) | 0.0(2)      |

---

Symmetry transformations used to generate equivalent atoms:

**Table S11.** Hydrogen bonds for C<sub>22</sub>H<sub>20</sub>NOP [Å and °]

| D-H...A             | d(D-H)    | d(H...A)  | d(D...A)   | <(DHA)    |
|---------------------|-----------|-----------|------------|-----------|
| N(1)-H(1N)...O(1)#1 | 0.871(13) | 2.104(13) | 2.9751(12) | 177.4(16) |
| N(2)-H(2N)...O(2)#2 | 0.904(14) | 1.992(15) | 2.8755(14) | 165.6(18) |

Symmetry transformations used to generate equivalent atoms:

#1 x+1,y,z #2 x-1,y,z

### X-Ray Crystal Structure of Homoallenylamide 7

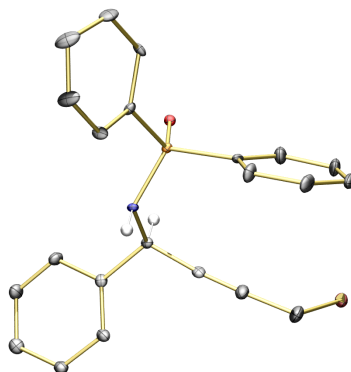

**Table S12.** Crystal data and structure refinement for (*R*)-*N*-(4-bromo-1-phenylbut-2-yn-1-yl)-*P,P*-diphenylphosphinic amide

|                      |                                       |          |
|----------------------|---------------------------------------|----------|
| Identification code  | C <sub>22</sub> H <sub>19</sub> BrNOP |          |
| Empirical formula    | C <sub>22</sub> H <sub>19</sub> BrNOP |          |
| Formula weight       | 424.26                                |          |
| Temperature          | 100(2) K                              |          |
| Wavelength           | 0.71073 Å                             |          |
| Crystal system       | Tetragonal                            |          |
| Space group          | I 4                                   |          |
| Unit cell dimensions | a = 27.1750(9) Å                      | a = 90°. |
|                      | b = 27.1750(9) Å                      | b = 90°. |
|                      | c = 5.2579(2) Å                       | g = 90°. |
| Volume               | 3882.9(2) Å <sup>3</sup>              |          |
| Z                    | 8                                     |          |
| Density (calculated) | 1.452 Mg/m <sup>3</sup>               |          |

|                                   |                                             |
|-----------------------------------|---------------------------------------------|
| Absorption coefficient            | 2.210 mm <sup>-1</sup>                      |
| F(000)                            | 1728                                        |
| Crystal size                      | 0.20 x 0.05 x 0.03 mm <sup>3</sup>          |
| Theta range for data collection   | 1.50 to 28.34°.                             |
| Index ranges                      | -36<=h<=36, -36<=k<=34, -7<=l<=6            |
| Reflections collected             | 29844                                       |
| Independent reflections           | 4780 [R(int) = 0.1011]                      |
| Completeness to theta = 28.34°    | 99.9 %                                      |
| Absorption correction             | Semi-empirical from equivalents             |
| Max. and min. transmission        | 0.9367 and 0.6662                           |
| Refinement method                 | Full-matrix least-squares on F <sup>2</sup> |
| Data / restraints / parameters    | 4780 / 287 / 282                            |
| Goodness-of-fit on F <sup>2</sup> | 1.058                                       |
| Final R indices [I>2sigma(I)]     | R1 = 0.0770, wR2 = 0.1752                   |
| R indices (all data)              | R1 = 0.1098, wR2 = 0.1901                   |
| Absolute structure parameter      | 0.03(2)                                     |
| Extinction coefficient            | na                                          |
| Largest diff. peak and hole       | 0.874 and -0.686 e.Å <sup>-3</sup>          |

**Table S13.** Atomic coordinates ( $\times 10^4$ ) and equivalent isotropic displacement parameters ( $\text{\AA}^2 \times 10^3$ ) for  $\text{C}_{22}\text{H}_{19}\text{BrNOP}$ .  $U(\text{eq})$  is defined as one third of the trace of the orthogonalized  $U^{ij}$  tensor

|        | x       | y        | z        | $U(\text{eq})$ |
|--------|---------|----------|----------|----------------|
| P(1)   | 7081(1) | 10089(1) | 1788(3)  | 15(1)          |
| O(1)   | 7071(1) | 9889(1)  | -839(8)  | 20(1)          |
| N(1)   | 7154(2) | 9648(2)  | 3927(9)  | 15(1)          |
| C(1)   | 6525(2) | 10393(2) | 2745(10) | 18(1)          |
| C(4)   | 5653(3) | 10861(3) | 4041(13) | 47(2)          |
| C(2)   | 6173(4) | 10125(4) | 4130(20) | 29(3)          |
| C(3)   | 5722(4) | 10379(4) | 4820(30) | 36(3)          |
| C(5)   | 6016(4) | 11127(4) | 3120(30) | 36(2)          |
| C(6)   | 6453(4) | 10889(3) | 2450(20) | 24(2)          |
| C(2X)  | 6366(4) | 10425(5) | 5204(18) | 23(3)          |
| C(3X)  | 5931(5) | 10663(7) | 5850(20) | 41(4)          |
| C(5X)  | 5859(5) | 10928(5) | 1640(20) | 36(2)          |
| C(6X)  | 6303(4) | 10668(4) | 790(20)  | 21(3)          |
| C(7)   | 7564(2) | 10547(2) | 2031(13) | 21(1)          |
| C(8)   | 7587(2) | 10867(2) | 4014(15) | 34(2)          |
| C(9)   | 7972(2) | 11205(2) | 4222(16) | 36(2)          |
| C(10)  | 8343(2) | 11205(2) | 2460(16) | 40(2)          |
| C(11)  | 8322(3) | 10878(3) | 498(15)  | 39(2)          |
| C(12)  | 7934(3) | 10551(3) | 215(15)  | 37(2)          |
| C(13)  | 7538(2) | 9273(2)  | 3438(11) | 19(1)          |
| C(14)  | 8032(2) | 9474(2)  | 3999(12) | 22(1)          |
| C(15)  | 8417(2) | 9667(2)  | 4342(15) | 33(2)          |
| C(16)  | 8877(2) | 9928(3)  | 4727(19) | 47(2)          |
| Br(1)  | 9296(1) | 9864(1)  | 1969(3)  | 36(1)          |
| Br(1X) | 9213(1) | 9780(1)  | 7655(3)  | 45(1)          |
| C(17)  | 7433(2) | 8802(2)  | 4900(12) | 20(1)          |
| C(18)  | 7706(2) | 8657(2)  | 6948(14) | 26(1)          |
| C(19)  | 7600(2) | 8224(2)  | 8196(13) | 28(1)          |
| C(20)  | 7219(2) | 7917(2)  | 7419(12) | 30(1)          |
| C(21)  | 6951(3) | 8070(3)  | 5327(13) | 35(2)          |
| C(22)  | 7041(2) | 8501(2)  | 4079(13) | 30(1)          |

**Table S14.** Bond lengths [Å] and angles [°] for C<sub>22</sub>H<sub>19</sub>BrNOP

---

|             |           |
|-------------|-----------|
| P(1)-O(1)   | 1.485(4)  |
| P(1)-N(1)   | 1.657(5)  |
| P(1)-C(1)   | 1.793(5)  |
| P(1)-C(7)   | 1.812(5)  |
| N(1)-C(13)  | 1.480(7)  |
| N(1)-H(1N)  | 0.91(2)   |
| C(1)-C(2X)  | 1.367(9)  |
| C(1)-C(6)   | 1.371(8)  |
| C(1)-C(6X)  | 1.405(8)  |
| C(1)-C(2)   | 1.407(8)  |
| C(4)-C(5)   | 1.315(10) |
| C(4)-C(3X)  | 1.331(10) |
| C(4)-C(3)   | 1.386(10) |
| C(4)-C(5X)  | 1.393(10) |
| C(4)-H(4)   | 0.9500    |
| C(2)-C(3)   | 1.451(13) |
| C(2)-H(2)   | 0.9500    |
| C(3)-H(3)   | 0.9500    |
| C(5)-C(6)   | 1.397(13) |
| C(5)-H(5)   | 0.9500    |
| C(6)-H(6)   | 0.9500    |
| C(2X)-C(3X) | 1.389(14) |
| C(2X)-H(2X) | 0.9500    |
| C(3X)-H(3X) | 0.9500    |
| C(5X)-C(6X) | 1.469(14) |
| C(5X)-H(5X) | 0.9500    |
| C(6X)-H(6X) | 0.9500    |
| C(7)-C(8)   | 1.359(9)  |
| C(7)-C(12)  | 1.386(9)  |
| C(8)-C(9)   | 1.398(8)  |
| C(8)-H(8)   | 0.9500    |
| C(9)-C(10)  | 1.368(11) |
| C(9)-H(9)   | 0.9500    |
| C(10)-C(11) | 1.362(11) |

|                  |            |
|------------------|------------|
| C(10)-H(10)      | 0.9500     |
| C(11)-C(12)      | 1.386(9)   |
| C(11)-H(11)      | 0.9500     |
| C(12)-H(12)      | 0.9500     |
| C(13)-C(14)      | 1.479(8)   |
| C(13)-C(17)      | 1.520(8)   |
| C(13)-H(13)      | 1.00(2)    |
| C(14)-C(15)      | 1.186(9)   |
| C(15)-C(16)      | 1.451(9)   |
| C(16)-Br(1)      | 1.851(9)   |
| C(16)-H(16A)     | 0.9900     |
| C(16)-H(16B)     | 0.9900     |
| Br(1)-Br(1)#1    | 2.7566(16) |
| Br(1)-Br(1)#2    | 2.7567(16) |
| C(17)-C(18)      | 1.366(9)   |
| C(17)-C(22)      | 1.412(8)   |
| C(18)-C(19)      | 1.378(8)   |
| C(18)-H(18)      | 0.9500     |
| C(19)-C(20)      | 1.390(9)   |
| C(19)-H(19)      | 0.9500     |
| C(20)-C(21)      | 1.384(10)  |
| C(20)-H(20)      | 0.9500     |
| C(21)-C(22)      | 1.364(9)   |
| C(21)-H(21)      | 0.9500     |
| C(22)-H(22)      | 0.9500     |
| O(1)-P(1)-N(1)   | 111.6(2)   |
| O(1)-P(1)-C(1)   | 114.5(2)   |
| N(1)-P(1)-C(1)   | 104.1(2)   |
| O(1)-P(1)-C(7)   | 109.3(3)   |
| N(1)-P(1)-C(7)   | 111.3(3)   |
| C(1)-P(1)-C(7)   | 106.0(2)   |
| C(13)-N(1)-P(1)  | 117.6(4)   |
| C(13)-N(1)-H(1N) | 108(4)     |
| P(1)-N(1)-H(1N)  | 121(4)     |
| C(2X)-C(1)-C(6)  | 89.9(8)    |



|                   |           |
|-------------------|-----------|
| C(2X)-C(1)-C(6X)  | 121.3(8)  |
| C(6)-C(1)-C(6X)   | 48.2(7)   |
| C(2X)-C(1)-C(2)   | 47.7(7)   |
| C(6)-C(1)-C(2)    | 118.0(7)  |
| C(6X)-C(1)-C(2)   | 111.2(8)  |
| C(2X)-C(1)-P(1)   | 124.2(6)  |
| C(6)-C(1)-P(1)    | 122.8(5)  |
| C(6X)-C(1)-P(1)   | 113.7(6)  |
| C(2)-C(1)-P(1)    | 118.7(5)  |
| C(5)-C(4)-C(3X)   | 93.4(11)  |
| C(5)-C(4)-C(3)    | 121.8(8)  |
| C(3X)-C(4)-C(3)   | 47.9(9)   |
| C(5)-C(4)-C(5X)   | 45.0(8)   |
| C(3X)-C(4)-C(5X)  | 118.4(9)  |
| C(3)-C(4)-C(5X)   | 109.7(9)  |
| C(5)-C(4)-H(4)    | 119.1     |
| C(3X)-C(4)-H(4)   | 128.9     |
| C(3)-C(4)-H(4)    | 119.1     |
| C(5X)-C(4)-H(4)   | 112.3     |
| C(1)-C(2)-C(3)    | 117.2(8)  |
| C(1)-C(2)-H(2)    | 121.4     |
| C(3)-C(2)-H(2)    | 121.4     |
| C(4)-C(3)-C(2)    | 119.4(9)  |
| C(4)-C(3)-H(3)    | 120.3     |
| C(2)-C(3)-H(3)    | 120.3     |
| C(4)-C(5)-C(6)    | 118.4(9)  |
| C(4)-C(5)-H(5)    | 120.8     |
| C(6)-C(5)-H(5)    | 120.8     |
| C(1)-C(6)-C(5)    | 123.3(9)  |
| C(1)-C(6)-H(6)    | 118.4     |
| C(5)-C(6)-H(6)    | 118.4     |
| C(1)-C(2X)-C(3X)  | 122.2(10) |
| C(1)-C(2X)-H(2X)  | 118.9     |
| C(3X)-C(2X)-H(2X) | 118.9     |
| C(4)-C(3X)-C(2X)  | 119.6(11) |
| C(4)-C(3X)-H(3X)  | 120.2     |

|                    |          |
|--------------------|----------|
| C(2X)-C(3X)-H(3X)  | 120.2    |
| C(4)-C(5X)-C(6X)   | 122.8(9) |
| C(4)-C(5X)-H(5X)   | 118.6    |
| C(6X)-C(5X)-H(5X)  | 118.6    |
| C(1)-C(6X)-C(5X)   | 112.8(9) |
| C(1)-C(6X)-H(6X)   | 123.6    |
| C(5X)-C(6X)-H(6X)  | 123.6    |
| C(8)-C(7)-C(12)    | 119.3(5) |
| C(8)-C(7)-P(1)     | 121.8(5) |
| C(12)-C(7)-P(1)    | 118.9(5) |
| C(7)-C(8)-C(9)     | 121.1(7) |
| C(7)-C(8)-H(8)     | 119.5    |
| C(9)-C(8)-H(8)     | 119.5    |
| C(10)-C(9)-C(8)    | 119.8(7) |
| C(10)-C(9)-H(9)    | 120.1    |
| C(8)-C(9)-H(9)     | 120.1    |
| C(11)-C(10)-C(9)   | 118.9(6) |
| C(11)-C(10)-H(10)  | 120.6    |
| C(9)-C(10)-H(10)   | 120.6    |
| C(10)-C(11)-C(12)  | 122.0(7) |
| C(10)-C(11)-H(11)  | 119.0    |
| C(12)-C(11)-H(11)  | 119.0    |
| C(11)-C(12)-C(7)   | 118.9(7) |
| C(11)-C(12)-H(12)  | 120.6    |
| C(7)-C(12)-H(12)   | 120.6    |
| C(14)-C(13)-N(1)   | 110.6(4) |
| C(14)-C(13)-C(17)  | 112.3(5) |
| N(1)-C(13)-C(17)   | 111.1(4) |
| C(14)-C(13)-H(13)  | 106(3)   |
| N(1)-C(13)-H(13)   | 109(4)   |
| C(17)-C(13)-H(13)  | 108(4)   |
| C(15)-C(14)-C(13)  | 174.8(6) |
| C(14)-C(15)-C(16)  | 177.0(7) |
| C(15)-C(16)-Br(1)  | 111.9(6) |
| C(15)-C(16)-H(16A) | 109.2    |
| Br(1)-C(16)-H(16A) | 109.2    |

|                       |           |
|-----------------------|-----------|
| C(15)-C(16)-H(16B)    | 109.2     |
| Br(1)-C(16)-H(16B)    | 109.2     |
| H(16A)-C(16)-H(16B)   | 107.9     |
| C(16)-Br(1)-Br(1)#1   | 105.4(3)  |
| C(16)-Br(1)-Br(1)#2   | 124.2(3)  |
| Br(1)#1-Br(1)-Br(1)#2 | 89.998(1) |
| C(18)-C(17)-C(22)     | 118.9(5)  |
| C(18)-C(17)-C(13)     | 122.8(5)  |
| C(22)-C(17)-C(13)     | 118.3(5)  |
| C(17)-C(18)-C(19)     | 120.6(6)  |
| C(17)-C(18)-H(18)     | 119.7     |
| C(19)-C(18)-H(18)     | 119.7     |
| C(18)-C(19)-C(20)     | 121.8(6)  |
| C(18)-C(19)-H(19)     | 119.1     |
| C(20)-C(19)-H(19)     | 119.1     |
| C(21)-C(20)-C(19)     | 116.5(6)  |
| C(21)-C(20)-H(20)     | 121.8     |
| C(19)-C(20)-H(20)     | 121.8     |
| C(22)-C(21)-C(20)     | 123.1(6)  |
| C(22)-C(21)-H(21)     | 118.4     |
| C(20)-C(21)-H(21)     | 118.4     |
| C(21)-C(22)-C(17)     | 119.0(6)  |
| C(21)-C(22)-H(22)     | 120.5     |
| C(17)-C(22)-H(22)     | 120.5     |

---

Symmetry transformations used to generate equivalent atoms:

#1  $y, -x+2, z$  #2  $-y+2, x, z$

**Table S15.** Anisotropic displacement parameters ( $\text{\AA}^2 \times 10^3$ ) for  $\text{C}_{22}\text{H}_{19}\text{BrNOP}$ . The anisotropic displacement factor exponent takes the form:  $-2p^2[ h^2 a^* U^{11} + \dots + 2 h k a^* b^* U^{12} ]$

|        | $U^{11}$ | $U^{22}$ | $U^{33}$ | $U^{23}$ | $U^{13}$ | $U^{12}$ |
|--------|----------|----------|----------|----------|----------|----------|
| P(1)   | 15(1)    | 17(1)    | 12(1)    | -3(1)    | -1(1)    | 0(1)     |
| O(1)   | 20(2)    | 21(2)    | 17(2)    | -1(2)    | 1(2)     | 1(2)     |
| N(1)   | 16(2)    | 16(2)    | 12(2)    | 0(2)     | -2(2)    | 4(2)     |
| C(1)   | 14(2)    | 23(2)    | 19(3)    | -7(2)    | -2(2)    | 0(2)     |
| C(4)   | 38(4)    | 59(4)    | 44(4)    | -23(3)   | -8(3)    | 29(3)    |
| C(2)   | 36(6)    | 35(6)    | 16(6)    | 7(5)     | 10(5)    | 10(4)    |
| C(3)   | 23(5)    | 65(7)    | 20(6)    | 7(6)     | 5(5)     | 11(5)    |
| C(5)   | 31(4)    | 26(4)    | 50(5)    | -2(4)    | -10(4)   | 16(3)    |
| C(6)   | 32(5)    | 15(4)    | 26(6)    | -3(4)    | -4(4)    | 3(4)     |
| C(2X)  | 27(6)    | 24(6)    | 19(6)    | -2(5)    | 7(5)     | 13(5)    |
| C(3X)  | 34(8)    | 65(10)   | 22(6)    | -8(7)    | 5(5)     | 26(7)    |
| C(5X)  | 31(4)    | 26(4)    | 50(5)    | -2(4)    | -10(4)   | 16(3)    |
| C(6X)  | 33(6)    | 16(6)    | 15(5)    | 3(5)     | 9(5)     | 2(5)     |
| C(7)   | 22(2)    | 20(2)    | 22(3)    | 6(2)     | -11(2)   | -5(2)    |
| C(8)   | 27(3)    | 27(3)    | 49(4)    | -13(3)   | 0(3)     | -8(2)    |
| C(9)   | 32(3)    | 24(3)    | 53(5)    | -10(3)   | -11(3)   | -9(2)    |
| C(10)  | 29(3)    | 30(3)    | 60(5)    | 10(3)    | -15(3)   | -13(2)   |
| C(11)  | 28(3)    | 49(4)    | 40(4)    | 4(3)     | 1(3)     | -18(3)   |
| C(12)  | 36(4)    | 39(4)    | 37(4)    | 2(3)     | 1(3)     | -15(3)   |
| C(13)  | 19(2)    | 21(3)    | 17(3)    | -2(2)    | 2(2)     | 4(2)     |
| C(14)  | 22(3)    | 17(2)    | 26(3)    | 0(2)     | 3(2)     | 9(2)     |
| C(15)  | 24(3)    | 31(3)    | 44(4)    | 4(3)     | 0(3)     | 2(2)     |
| C(16)  | 26(3)    | 54(4)    | 60(5)    | 9(4)     | -6(3)    | -9(3)    |
| Br(1)  | 24(1)    | 41(1)    | 43(1)    | 12(1)    | 3(1)     | -2(1)    |
| Br(1X) | 38(1)    | 55(1)    | 42(1)    | -8(1)    | -6(1)    | 2(1)     |
| C(17)  | 22(3)    | 15(2)    | 24(3)    | -6(2)    | 5(2)     | 4(2)     |
| C(18)  | 25(3)    | 26(3)    | 28(3)    | 3(3)     | 5(3)     | 7(2)     |
| C(19)  | 28(3)    | 28(3)    | 30(4)    | 3(2)     | 1(2)     | 6(2)     |
| C(20)  | 38(3)    | 24(3)    | 29(4)    | -8(2)    | 6(3)     | 5(2)     |
| C(21)  | 36(4)    | 32(3)    | 36(4)    | -4(3)    | -4(3)    | -7(3)    |
| C(22)  | 29(3)    | 28(3)    | 34(4)    | -3(3)    | -9(3)    | -2(2)    |

**Table S16.** Hydrogen coordinates ( $\times 10^4$ ) and isotropic displacement parameters ( $\text{\AA}^2 \times 10^3$ ) for  $\text{C}_{22}\text{H}_{19}\text{BrNOP}$ 

|        | x        | y        | z        | U(eq) |
|--------|----------|----------|----------|-------|
| H(1N)  | 7160(20) | 9720(20) | 5620(50) | 18    |
| H(4)   | 5335     | 11004    | 4177     | 56    |
| H(2)   | 6227     | 9792     | 4597     | 35    |
| H(3)   | 5477     | 10216    | 5793     | 43    |
| H(5)   | 5982     | 11472    | 2911     | 43    |
| H(6)   | 6713     | 11080    | 1760     | 29    |
| H(2X)  | 6558     | 10280    | 6512     | 28    |
| H(3X)  | 5833     | 10684    | 7586     | 49    |
| H(5X)  | 5705     | 11151    | 499      | 43    |
| H(6X)  | 6428     | 10684    | -892     | 26    |
| H(8)   | 7338     | 10860    | 5279     | 41    |
| H(9)   | 7977     | 11435    | 5582     | 44    |
| H(10)  | 8610     | 11428    | 2604     | 47    |
| H(11)  | 8581     | 10874    | -714     | 47    |
| H(12)  | 7922     | 10334    | -1199    | 45    |
| H(13)  | 7540(20) | 9190(20) | 1580(50) | 23    |
| H(16A) | 9042     | 9799     | 6268     | 56    |
| H(16B) | 8807     | 10281    | 5013     | 56    |
| H(18)  | 7972     | 8856     | 7516     | 32    |
| H(19)  | 7793     | 8132     | 9628     | 34    |
| H(20)  | 7147     | 7618     | 8279     | 36    |
| H(21)  | 6692     | 7866     | 4732     | 42    |
| H(22)  | 6842     | 8597     | 2677     | 37    |

**Table S17.** Torsion angles [°] for C<sub>22</sub>H<sub>19</sub>BrNOP

|                        |           |
|------------------------|-----------|
| O(1)-P(1)-N(1)-C(13)   | 46.0(4)   |
| C(1)-P(1)-N(1)-C(13)   | 170.0(4)  |
| C(7)-P(1)-N(1)-C(13)   | -76.3(5)  |
| O(1)-P(1)-C(1)-C(2X)   | 152.1(8)  |
| N(1)-P(1)-C(1)-C(2X)   | 30.0(8)   |
| C(7)-P(1)-C(1)-C(2X)   | -87.4(8)  |
| O(1)-P(1)-C(1)-C(6)    | -92.2(7)  |
| N(1)-P(1)-C(1)-C(6)    | 145.7(7)  |
| C(7)-P(1)-C(1)-C(6)    | 28.3(7)   |
| O(1)-P(1)-C(1)-C(6X)   | -37.9(7)  |
| N(1)-P(1)-C(1)-C(6X)   | -160.0(6) |
| C(7)-P(1)-C(1)-C(6X)   | 82.6(7)   |
| O(1)-P(1)-C(1)-C(2)    | 95.8(7)   |
| N(1)-P(1)-C(1)-C(2)    | -26.3(7)  |
| C(7)-P(1)-C(1)-C(2)    | -143.7(7) |
| C(2X)-C(1)-C(2)-C(3)   | 69.9(12)  |
| C(6)-C(1)-C(2)-C(3)    | 9.1(14)   |
| C(6X)-C(1)-C(2)-C(3)   | -43.8(13) |
| P(1)-C(1)-C(2)-C(3)    | -178.5(8) |
| C(5)-C(4)-C(3)-C(2)    | -13.0(18) |
| C(3X)-C(4)-C(3)-C(2)   | -75.3(13) |
| C(5X)-C(4)-C(3)-C(2)   | 35.6(15)  |
| C(1)-C(2)-C(3)-C(4)    | 1.7(17)   |
| C(3X)-C(4)-C(5)-C(6)   | 53.8(14)  |
| C(3)-C(4)-C(5)-C(6)    | 12.7(18)  |
| C(5X)-C(4)-C(5)-C(6)   | -74.0(13) |
| C(2X)-C(1)-C(6)-C(5)   | -50.1(13) |
| C(6X)-C(1)-C(6)-C(5)   | 84.3(13)  |
| C(2)-C(1)-C(6)-C(5)    | -9.9(15)  |
| P(1)-C(1)-C(6)-C(5)    | 178.0(9)  |
| C(4)-C(5)-C(6)-C(1)    | -1.0(18)  |
| C(6)-C(1)-C(2X)-C(3X)  | 49.4(15)  |
| C(6X)-C(1)-C(2X)-C(3X) | 10.9(19)  |
| C(2)-C(1)-C(2X)-C(3X)  | -80.2(15) |

|                           |            |
|---------------------------|------------|
| P(1)-C(1)-C(2X)-C(3X)     | -179.8(12) |
| C(5)-C(4)-C(3X)-C(2X)     | -54.6(17)  |
| C(3)-C(4)-C(3X)-C(2X)     | 76.5(16)   |
| C(5X)-C(4)-C(3X)-C(2X)    | -15(2)     |
| C(1)-C(2X)-C(3X)-C(4)     | 1(2)       |
| C(5)-C(4)-C(5X)-C(6X)     | 82.0(15)   |
| C(3X)-C(4)-C(5X)-C(6X)    | 18.3(19)   |
| C(3)-C(4)-C(5X)-C(6X)     | -33.6(16)  |
| C(2X)-C(1)-C(6X)-C(5X)    | -7.6(15)   |
| C(6)-C(1)-C(6X)-C(5X)     | -64.3(11)  |
| C(2)-C(1)-C(6X)-C(5X)     | 44.9(13)   |
| P(1)-C(1)-C(6X)-C(5X)     | -178.0(9)  |
| C(4)-C(5X)-C(6X)-C(1)     | -6.7(18)   |
| O(1)-P(1)-C(7)-C(8)       | 165.0(5)   |
| N(1)-P(1)-C(7)-C(8)       | -71.3(5)   |
| C(1)-P(1)-C(7)-C(8)       | 41.2(6)    |
| O(1)-P(1)-C(7)-C(12)      | -18.5(6)   |
| N(1)-P(1)-C(7)-C(12)      | 105.1(5)   |
| C(1)-P(1)-C(7)-C(12)      | -142.4(5)  |
| C(12)-C(7)-C(8)-C(9)      | 1.2(10)    |
| P(1)-C(7)-C(8)-C(9)       | 177.7(5)   |
| C(7)-C(8)-C(9)-C(10)      | -2.5(11)   |
| C(8)-C(9)-C(10)-C(11)     | 1.5(11)    |
| C(9)-C(10)-C(11)-C(12)    | 0.8(12)    |
| C(10)-C(11)-C(12)-C(7)    | -2.1(12)   |
| C(8)-C(7)-C(12)-C(11)     | 1.0(10)    |
| P(1)-C(7)-C(12)-C(11)     | -175.5(6)  |
| P(1)-N(1)-C(13)-C(14)     | 77.0(5)    |
| P(1)-N(1)-C(13)-C(17)     | -157.7(4)  |
| N(1)-C(13)-C(14)-C(15)    | -47(7)     |
| C(17)-C(13)-C(14)-C(15)   | -172(7)    |
| C(13)-C(14)-C(15)-C(16)   | 19(21)     |
| C(14)-C(15)-C(16)-Br(1)   | -101(15)   |
| C(15)-C(16)-Br(1)-Br(1)#1 | 151.8(5)   |
| C(15)-C(16)-Br(1)-Br(1)#2 | -107.4(5)  |
| C(14)-C(13)-C(17)-C(18)   | 15.8(8)    |

|                         |           |
|-------------------------|-----------|
| N(1)-C(13)-C(17)-C(18)  | -108.6(6) |
| C(14)-C(13)-C(17)-C(22) | -163.4(5) |
| N(1)-C(13)-C(17)-C(22)  | 72.2(7)   |
| C(22)-C(17)-C(18)-C(19) | -0.2(9)   |
| C(13)-C(17)-C(18)-C(19) | -179.3(5) |
| C(17)-C(18)-C(19)-C(20) | 0.8(9)    |
| C(18)-C(19)-C(20)-C(21) | -0.1(9)   |
| C(19)-C(20)-C(21)-C(22) | -1.1(10)  |
| C(20)-C(21)-C(22)-C(17) | 1.7(10)   |
| C(18)-C(17)-C(22)-C(21) | -1.0(9)   |
| C(13)-C(17)-C(22)-C(21) | 178.2(6)  |

---

Symmetry transformations used to generate equivalent atoms:

#1  $y, -x+2, z$  #2  $-y+2, x, z$



**Table S18.** Hydrogen bonds for C<sub>22</sub>H<sub>19</sub>BrNOP [Å and °]

| D-H...A             | d(D-H)  | d(H...A) | d(D...A) | <(DHA) |
|---------------------|---------|----------|----------|--------|
| N(1)-H(1N)...O(1)#3 | 0.91(2) | 1.93(2)  | 2.838(6) | 171(6) |

Symmetry transformations used to generate equivalent atoms:

#1 y,-x+2,z #2 -y+2,x,z #3 x,y,z+1

### X-Ray Crystal Structure of Homoallenylamide 4f

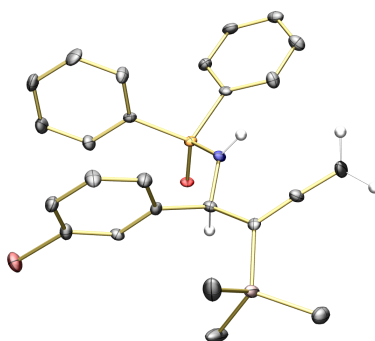

**Table S19.** Crystal data and structure refinement for (*R*)-*N*-(1-(3-bromophenyl)-2-(trimethylsilyl)buta-2,3-dien-1-yl)-*P,P*-diphenylphosphinic amide

|                        |                                         |                  |
|------------------------|-----------------------------------------|------------------|
| Identification code    | C <sub>25</sub> H <sub>27</sub> BrNOPSi |                  |
| Empirical formula      | C <sub>25</sub> H <sub>27</sub> BrNOPSi |                  |
| Formula weight         | 496.44                                  |                  |
| Temperature            | 100(2) K                                |                  |
| Wavelength             | 1.54178 Å                               |                  |
| Crystal system         | Monoclinic                              |                  |
| Space group            | P 21                                    |                  |
| Unit cell dimensions   | a = 19.8739(8) Å                        | a = 90°.         |
|                        | b = 10.2459(5) Å                        | b = 96.599(3) °. |
|                        | c = 24.6435(9) Å                        | g = 90°.         |
| Volume                 | 4984.8(4) Å <sup>3</sup>                |                  |
| Z                      | 8                                       |                  |
| Density (calculated)   | 1.323 Mg/m <sup>3</sup>                 |                  |
| Absorption coefficient | 3.433 mm <sup>-1</sup>                  |                  |
| F(000)                 | 2048                                    |                  |

|                                   |                                             |
|-----------------------------------|---------------------------------------------|
| Crystal size                      | 0.140 x 0.100 x 0.060 mm <sup>3</sup>       |
| Theta range for data collection   | 1.805 to 68.225°.                           |
| Index ranges                      | -23<=h<=18, -11<=k<=9, -29<=l<=28           |
| Reflections collected             | 49707                                       |
| Independent reflections           | 14390 [R(int) = 0.0895]                     |
| Completeness to theta = 67.679°   | 96.8 %                                      |
| Absorption correction             | Semi-empirical from equivalents             |
| Max. and min. transmission        | 0.7532 and 0.6241                           |
| Refinement method                 | Full-matrix least-squares on F <sup>2</sup> |
| Data / restraints / parameters    | 14390 / 314 / 1104                          |
| Goodness-of-fit on F <sup>2</sup> | 1.013                                       |
| Final R indices [I>2sigma(I)]     | R1 = 0.0626, wR2 = 0.1530                   |
| R indices (all data)              | R1 = 0.0999, wR2 = 0.1717                   |
| Absolute structure parameter      | 0.011(13)                                   |
| Extinction coefficient            | na                                          |
| Largest diff. peak and hole       | 1.293 and -0.863 e.Å <sup>-3</sup>          |

**Table S20.** Atomic coordinates ( $\times 10^4$ ) and equivalent isotropic displacement parameters ( $\text{\AA}^2 \times 10^3$ ) for  $\text{C}_{25}\text{H}_{27}\text{BrNOPSi}$ .  $U(\text{eq})$  is defined as one third of the trace of the orthogonalized  $U^{ij}$  tensor

|       | x        | y        | z       | $U(\text{eq})$ |
|-------|----------|----------|---------|----------------|
| Br(1) | 1609(1)  | 7553(2)  | 7202(1) | 56(1)          |
| P(1)  | 224(1)   | 6992(3)  | 4987(1) | 25(1)          |
| Si(1) | -1764(1) | 6958(3)  | 6428(1) | 30(1)          |
| O(1)  | 181(3)   | 8430(7)  | 5037(2) | 32(2)          |
| N(1)  | -386(3)  | 6236(8)  | 5265(3) | 25(2)          |
| C(1)  | 934(5)   | 6426(12) | 6885(3) | 36(2)          |
| C(2)  | 913(5)   | 5125(13) | 7030(4) | 43(3)          |
| C(3)  | 409(6)   | 4345(12) | 6793(4) | 41(3)          |
| C(4)  | -97(5)   | 4804(11) | 6411(4) | 35(2)          |
| C(5)  | -82(4)   | 6110(10) | 6250(3) | 28(2)          |
| C(6)  | 427(5)   | 6923(12) | 6503(4) | 36(2)          |
| C(7)  | -571(4)  | 6646(9)  | 5800(3) | 25(2)          |
| C(8)  | -1314(5) | 6316(10) | 5852(4) | 28(2)          |
| C(9)  | -1685(5) | 5673(11) | 5476(4) | 31(2)          |
| C(10) | -2114(6) | 5041(15) | 5114(5) | 50(4)          |
| C(11) | 117(5)   | 6384(10) | 4297(3) | 29(2)          |
| C(12) | -531(5)  | 6050(11) | 4043(4) | 34(2)          |
| C(13) | -612(5)  | 5636(11) | 3509(4) | 37(3)          |
| C(14) | -58(5)   | 5550(13) | 3213(4) | 45(3)          |
| C(15) | 577(6)   | 5877(14) | 3462(4) | 52(3)          |
| C(16) | 654(5)   | 6297(12) | 4007(4) | 46(3)          |
| C(17) | 1042(4)  | 6428(10) | 5288(3) | 27(2)          |
| C(18) | 1201(5)  | 5106(11) | 5315(4) | 37(2)          |
| C(19) | 1826(6)  | 4708(13) | 5575(5) | 51(3)          |
| C(20) | 2293(6)  | 5623(14) | 5803(4) | 50(3)          |
| C(21) | 2129(5)  | 6938(13) | 5783(4) | 46(3)          |
| C(22) | 1507(4)  | 7331(11) | 5529(3) | 32(2)          |
| C(23) | -1184(5) | 7465(14) | 7024(4) | 60(4)          |
| C(24) | -2252(6) | 8383(13) | 6136(4) | 56(3)          |
| C(25) | -2362(6) | 5708(13) | 6641(4) | 55(3)          |
| Br(2) | 8730(1)  | 3219(2)  | 7582(1) | 44(1)          |

|        |          |          |          |       |
|--------|----------|----------|----------|-------|
| Br(2X) | 8377(6)  | 2806(19) | 7845(6)  | 92(5) |
| P(2)   | 9730(1)  | 2246(3)  | 10001(1) | 23(1) |
| Si(2)  | 11750(1) | 1944(4)  | 8580(1)  | 37(1) |
| O(2)   | 9721(3)  | 3676(7)  | 9901(2)  | 28(2) |
| N(2)   | 10381(3) | 1531(8)  | 9766(3)  | 21(2) |
| C(26)  | 9230(5)  | 1967(11) | 8035(3)  | 31(2) |
| C(27)  | 9729(4)  | 2397(11) | 8443(3)  | 33(2) |
| C(28)  | 10083(4) | 1480(10) | 8769(3)  | 23(2) |
| C(29)  | 9957(5)  | 156(11)  | 8681(4)  | 37(2) |
| C(30)  | 9473(5)  | -243(11) | 8272(4)  | 35(2) |
| C(31)  | 9092(5)  | 655(11)  | 7950(4)  | 32(2) |
| C(32)  | 10597(4) | 1937(10) | 9244(3)  | 27(2) |
| C(33)  | 11311(4) | 1442(10) | 9185(4)  | 25(2) |
| C(34)  | 11647(4) | 724(11)  | 9561(4)  | 31(2) |
| C(35)  | 12005(5) | 13(12)   | 9931(5)  | 45(3) |
| C(36)  | 9816(4)  | 1770(10) | 10709(3) | 26(2) |
| C(37)  | 10442(5) | 1361(11) | 10971(3) | 32(2) |
| C(38)  | 10505(6) | 1065(11) | 11526(4) | 37(3) |
| C(39)  | 9952(5)  | 1197(11) | 11815(4) | 39(3) |
| C(40)  | 9346(6)  | 1611(12) | 11557(4) | 47(3) |
| C(41)  | 9277(5)  | 1898(12) | 11003(4) | 41(3) |
| C(42)  | 8956(4)  | 1514(10) | 9692(3)  | 25(2) |
| C(43)  | 8824(5)  | 194(10)  | 9764(4)  | 33(2) |
| C(44)  | 8252(5)  | -379(11) | 9500(4)  | 41(3) |
| C(45)  | 7792(5)  | 367(13)  | 9160(4)  | 46(3) |
| C(46)  | 7915(5)  | 1689(13) | 9080(4)  | 44(3) |
| C(47)  | 8492(4)  | 2255(11) | 9339(3)  | 31(2) |
| C(48)  | 11393(6) | 1100(18) | 7947(4)  | 80(5) |
| C(49)  | 11636(6) | 3704(14) | 8483(6)  | 70(4) |
| C(50)  | 12665(5) | 1561(14) | 8722(4)  | 51(3) |
| Br(3)  | 3291(1)  | 2829(1)  | 309(1)   | 47(1) |
| P(3)   | 4577(1)  | 2149(3)  | 2531(1)  | 26(1) |
| Si(3)  | 6606(1)  | 1941(3)  | 1108(1)  | 36(1) |
| O(3)   | 4560(3)  | 3578(7)  | 2435(3)  | 33(2) |
| N(3)   | 5220(4)  | 1446(8)  | 2290(3)  | 27(2) |
| C(51)  | 3957(5)  | 1709(11) | 642(3)   | 31(2) |

|       |         |          |         |       |
|-------|---------|----------|---------|-------|
| C(52) | 3951(5) | 420(11)  | 501(4)  | 33(2) |
| C(53) | 4451(5) | -408(11) | 746(4)  | 35(2) |
| C(54) | 4942(5) | 59(11)   | 1138(4) | 34(2) |
| C(55) | 4944(4) | 1367(10) | 1296(3) | 23(2) |
| C(56) | 4458(4) | 2206(11) | 1038(3) | 32(2) |
| C(57) | 5431(4) | 1856(10) | 1764(3) | 25(2) |
| C(58) | 6157(5) | 1491(10) | 1717(4) | 27(2) |
| C(59) | 6527(5) | 818(12)  | 2092(4) | 40(3) |
| C(60) | 6945(5) | 135(15)  | 2440(5) | 68(5) |
| C(61) | 4677(5) | 1708(10) | 3250(3) | 28(2) |
| C(62) | 5280(5) | 1149(11) | 3504(4) | 37(2) |
| C(63) | 5353(6) | 935(11)  | 4060(4) | 38(2) |
| C(64) | 4835(6) | 1242(11) | 4364(4) | 43(3) |
| C(65) | 4235(6) | 1797(12) | 4114(4) | 45(3) |
| C(66) | 4159(5) | 2007(11) | 3556(4) | 39(2) |
| C(67) | 3796(5) | 1410(10) | 2244(3) | 28(2) |
| C(68) | 3688(5) | 60(10)   | 2271(4) | 33(2) |
| C(69) | 3093(5) | -486(12) | 2031(4) | 42(3) |
| C(70) | 2598(5) | 289(13)  | 1762(4) | 44(3) |
| C(71) | 2692(5) | 1629(13) | 1727(4) | 46(3) |
| C(72) | 3289(5) | 2184(11) | 1969(4) | 34(2) |
| C(73) | 6122(5) | 3209(15) | 705(5)  | 61(4) |
| C(74) | 6688(7) | 499(17)  | 676(5)  | 83(5) |
| C(75) | 7445(5) | 2538(15) | 1363(4) | 64(4) |
| Br(4) | 6619(1) | 7922(1)  | 4572(1) | 52(1) |
| P(4)  | 5181(1) | 7125(2)  | 2385(1) | 24(1) |
| Si(4) | 3362(1) | 6947(3)  | 3973(1) | 35(1) |
| O(4)  | 5214(3) | 8556(6)  | 2478(2) | 25(2) |
| N(4)  | 4557(3) | 6434(8)  | 2662(3) | 24(2) |
| C(76) | 5943(5) | 6767(11) | 4267(4) | 35(2) |
| C(77) | 5997(5) | 5458(11) | 4392(4) | 37(2) |
| C(78) | 5501(6) | 4623(11) | 4145(5) | 42(3) |
| C(79) | 4994(5) | 5064(11) | 3779(4) | 40(2) |
| C(80) | 4942(4) | 6393(10) | 3648(3) | 25(2) |
| C(81) | 5414(4) | 7262(10) | 3898(3) | 28(2) |
| C(82) | 4401(4) | 6871(10) | 3201(3) | 27(2) |

|        |         |          |         |       |
|--------|---------|----------|---------|-------|
| C(83)  | 3682(4) | 6513(9)  | 3305(4) | 25(2) |
| C(84)  | 3265(5) | 5952(11) | 2930(4) | 31(2) |
| C(85)  | 2819(5) | 5425(14) | 2560(4) | 50(3) |
| C(86)  | 5018(5) | 6648(9)  | 1676(4) | 28(2) |
| C(87)  | 4395(5) | 6185(11) | 1440(4) | 37(3) |
| C(88)  | 4306(6) | 5887(12) | 894(4)  | 44(3) |
| C(89)  | 4819(6) | 6041(11) | 558(4)  | 40(3) |
| C(90)  | 5428(5) | 6495(12) | 802(4)  | 43(3) |
| C(91)  | 5537(5) | 6797(11) | 1352(4) | 38(3) |
| C(92)  | 5974(4) | 6378(10) | 2643(3) | 26(2) |
| C(93)  | 6082(5) | 5051(11) | 2579(4) | 39(2) |
| C(94)  | 6684(6) | 4483(12) | 2792(5) | 50(3) |
| C(95)  | 7193(5) | 5229(13) | 3082(4) | 45(3) |
| C(96)  | 7078(5) | 6549(13) | 3160(4) | 46(3) |
| C(97)  | 6477(5) | 7125(12) | 2950(4) | 38(2) |
| C(98)  | 3750(6) | 8492(15) | 4217(6) | 79(5) |
| C(99)  | 3613(6) | 5693(15) | 4498(4) | 63(4) |
| C(100) | 2439(5) | 7068(12) | 3871(5) | 50(3) |

---

**Table S21.** Bond lengths [Å] and angles [°] for C<sub>25</sub>H<sub>27</sub>BrNOPSi

---

|              |           |
|--------------|-----------|
| Br(1)-C(1)   | 1.871(11) |
| P(1)-O(1)    | 1.482(7)  |
| P(1)-N(1)    | 1.653(7)  |
| P(1)-C(11)   | 1.800(9)  |
| P(1)-C(17)   | 1.803(10) |
| Si(1)-C(23)  | 1.836(11) |
| Si(1)-C(24)  | 1.851(12) |
| Si(1)-C(25)  | 1.864(12) |
| Si(1)-C(8)   | 1.882(9)  |
| N(1)-C(7)    | 1.470(10) |
| N(1)-H(1N)   | 0.8800    |
| C(1)-C(2)    | 1.383(16) |
| C(1)-C(6)    | 1.393(13) |
| C(2)-C(3)    | 1.360(16) |
| C(2)-H(2)    | 0.9500    |
| C(3)-C(4)    | 1.379(14) |
| C(3)-H(3)    | 0.9500    |
| C(4)-C(5)    | 1.396(15) |
| C(4)-H(4)    | 0.9500    |
| C(5)-C(6)    | 1.401(14) |
| C(5)-C(7)    | 1.494(12) |
| C(6)-H(6)    | 0.9500    |
| C(7)-C(8)    | 1.534(12) |
| C(7)-H(7)    | 1.0000    |
| C(8)-C(9)    | 1.296(13) |
| C(9)-C(10)   | 1.330(15) |
| C(10)-H(10A) | 0.93(11)  |
| C(10)-H(10B) | 0.83(12)  |
| C(11)-C(16)  | 1.354(13) |
| C(11)-C(12)  | 1.408(13) |
| C(12)-C(13)  | 1.375(13) |
| C(12)-H(12)  | 0.9500    |
| C(13)-C(14)  | 1.392(14) |
| C(13)-H(13)  | 0.9500    |

|              |           |
|--------------|-----------|
| C(14)-C(15)  | 1.380(15) |
| C(14)-H(14)  | 0.9500    |
| C(15)-C(16)  | 1.402(14) |
| C(15)-H(15)  | 0.9500    |
| C(16)-H(16)  | 0.9500    |
| C(17)-C(18)  | 1.391(14) |
| C(17)-C(22)  | 1.392(13) |
| C(18)-C(19)  | 1.391(15) |
| C(18)-H(18)  | 0.9500    |
| C(19)-C(20)  | 1.392(17) |
| C(19)-H(19)  | 0.9500    |
| C(20)-C(21)  | 1.386(18) |
| C(20)-H(20)  | 0.9500    |
| C(21)-C(22)  | 1.379(14) |
| C(21)-H(21)  | 0.9500    |
| C(22)-H(22)  | 0.9500    |
| C(23)-H(23A) | 0.9800    |
| C(23)-H(23B) | 0.9800    |
| C(23)-H(23C) | 0.9800    |
| C(24)-H(24A) | 0.9800    |
| C(24)-H(24B) | 0.9800    |
| C(24)-H(24C) | 0.9800    |
| C(25)-H(25A) | 0.9800    |
| C(25)-H(25B) | 0.9800    |
| C(25)-H(25C) | 0.9800    |
| Br(2)-Br(2X) | 1.095(17) |
| Br(2)-C(26)  | 1.903(10) |
| Br(2X)-C(26) | 1.911(15) |
| P(2)-O(2)    | 1.486(7)  |
| P(2)-N(2)    | 1.649(7)  |
| P(2)-C(42)   | 1.799(9)  |
| P(2)-C(36)   | 1.801(9)  |
| Si(2)-C(49)  | 1.829(14) |
| Si(2)-C(48)  | 1.853(12) |
| Si(2)-C(50)  | 1.853(10) |
| Si(2)-C(33)  | 1.883(9)  |



|              |           |
|--------------|-----------|
| N(2)-C(32)   | 1.464(10) |
| N(2)-H(2N)   | 0.8800    |
| C(26)-C(31)  | 1.383(14) |
| C(26)-C(27)  | 1.400(12) |
| C(27)-C(28)  | 1.376(13) |
| C(27)-H(27)  | 0.9500    |
| C(28)-C(29)  | 1.392(14) |
| C(28)-C(32)  | 1.536(12) |
| C(29)-C(30)  | 1.372(14) |
| C(29)-H(29)  | 0.9500    |
| C(30)-C(31)  | 1.383(14) |
| C(30)-H(30)  | 0.9500    |
| C(31)-H(31)  | 0.9500    |
| C(32)-C(33)  | 1.529(12) |
| C(32)-H(32)  | 1.0000    |
| C(33)-C(34)  | 1.304(13) |
| C(34)-C(35)  | 1.312(14) |
| C(35)-H(35A) | 0.9500    |
| C(35)-H(35B) | 0.9500    |
| C(36)-C(41)  | 1.367(12) |
| C(36)-C(37)  | 1.399(13) |
| C(37)-C(38)  | 1.391(12) |
| C(37)-H(37)  | 0.9500    |
| C(38)-C(39)  | 1.384(14) |
| C(38)-H(38)  | 0.9500    |
| C(39)-C(40)  | 1.364(15) |
| C(39)-H(39)  | 0.9500    |
| C(40)-C(41)  | 1.387(13) |
| C(40)-H(40)  | 0.9500    |
| C(41)-H(41)  | 0.9500    |
| C(42)-C(43)  | 1.393(14) |
| C(42)-C(47)  | 1.415(12) |
| C(43)-C(44)  | 1.375(14) |
| C(43)-H(43)  | 0.9500    |
| C(44)-C(45)  | 1.394(15) |
| C(44)-H(44)  | 0.9500    |

|              |           |
|--------------|-----------|
| C(45)-C(46)  | 1.394(17) |
| C(45)-H(45)  | 0.9500    |
| C(46)-C(47)  | 1.374(14) |
| C(46)-H(46)  | 0.9500    |
| C(47)-H(47)  | 0.9500    |
| C(48)-H(48A) | 0.9800    |
| C(48)-H(48B) | 0.9800    |
| C(48)-H(48C) | 0.9800    |
| C(49)-H(49A) | 0.9800    |
| C(49)-H(49B) | 0.9800    |
| C(49)-H(49C) | 0.9800    |
| C(50)-H(50A) | 0.9800    |
| C(50)-H(50B) | 0.9800    |
| C(50)-H(50C) | 0.9800    |
| Br(3)-C(51)  | 1.869(10) |
| P(3)-O(3)    | 1.483(7)  |
| P(3)-N(3)    | 1.638(8)  |
| P(3)-C(67)   | 1.797(10) |
| P(3)-C(61)   | 1.818(9)  |
| Si(3)-C(75)  | 1.820(11) |
| Si(3)-C(73)  | 1.837(12) |
| Si(3)-C(74)  | 1.840(14) |
| Si(3)-C(58)  | 1.890(9)  |
| N(3)-C(57)   | 1.467(10) |
| N(3)-H(3N)   | 0.8800    |
| C(51)-C(52)  | 1.365(14) |
| C(51)-C(56)  | 1.409(13) |
| C(52)-C(53)  | 1.390(14) |
| C(52)-H(52)  | 0.9500    |
| C(53)-C(54)  | 1.377(13) |
| C(53)-H(53)  | 0.9500    |
| C(54)-C(55)  | 1.396(14) |
| C(54)-H(54)  | 0.9500    |
| C(55)-C(56)  | 1.391(13) |
| C(55)-C(57)  | 1.504(12) |
| C(56)-H(56)  | 0.9500    |

|              |           |
|--------------|-----------|
| C(57)-C(58)  | 1.508(12) |
| C(57)-H(57)  | 1.0000    |
| C(58)-C(59)  | 1.308(13) |
| C(59)-C(60)  | 1.324(14) |
| C(60)-H(60A) | 0.9500    |
| C(60)-H(60B) | 0.9500    |
| C(61)-C(66)  | 1.378(13) |
| C(61)-C(62)  | 1.409(14) |
| C(62)-C(63)  | 1.379(13) |
| C(62)-H(62)  | 0.9500    |
| C(63)-C(64)  | 1.378(15) |
| C(63)-H(63)  | 0.9500    |
| C(64)-C(65)  | 1.399(15) |
| C(64)-H(64)  | 0.9500    |
| C(65)-C(66)  | 1.383(13) |
| C(65)-H(65)  | 0.9500    |
| C(66)-H(66)  | 0.9500    |
| C(67)-C(72)  | 1.395(13) |
| C(67)-C(68)  | 1.402(14) |
| C(68)-C(69)  | 1.378(14) |
| C(68)-H(68)  | 0.9500    |
| C(69)-C(70)  | 1.375(16) |
| C(69)-H(69)  | 0.9500    |
| C(70)-C(71)  | 1.389(16) |
| C(70)-H(70)  | 0.9500    |
| C(71)-C(72)  | 1.387(14) |
| C(71)-H(71)  | 0.9500    |
| C(72)-H(72)  | 0.9500    |
| C(73)-H(73A) | 0.9800    |
| C(73)-H(73B) | 0.9800    |
| C(73)-H(73C) | 0.9800    |
| C(74)-H(74A) | 0.9800    |
| C(74)-H(74B) | 0.9800    |
| C(74)-H(74C) | 0.9800    |
| C(75)-H(75A) | 0.9800    |
| C(75)-H(75B) | 0.9800    |

|              |           |
|--------------|-----------|
| C(75)-H(75C) | 0.9800    |
| Br(4)-C(76)  | 1.879(10) |
| P(4)-O(4)    | 1.484(7)  |
| P(4)-N(4)    | 1.642(7)  |
| P(4)-C(92)   | 1.801(10) |
| P(4)-C(86)   | 1.808(9)  |
| Si(4)-C(100) | 1.826(10) |
| Si(4)-C(98)  | 1.833(13) |
| Si(4)-C(99)  | 1.851(13) |
| Si(4)-C(83)  | 1.886(9)  |
| N(4)-C(82)   | 1.468(10) |
| N(4)-H(4N)   | 0.8800    |
| C(76)-C(77)  | 1.377(15) |
| C(76)-C(81)  | 1.405(13) |
| C(77)-C(78)  | 1.391(15) |
| C(77)-H(77)  | 0.9500    |
| C(78)-C(79)  | 1.351(15) |
| C(78)-H(78)  | 0.9500    |
| C(79)-C(80)  | 1.401(14) |
| C(79)-H(79)  | 0.9500    |
| C(80)-C(81)  | 1.386(12) |
| C(80)-C(82)  | 1.528(12) |
| C(81)-H(81)  | 0.9500    |
| C(82)-C(83)  | 1.524(12) |
| C(82)-H(82)  | 1.0000    |
| C(83)-C(84)  | 1.302(12) |
| C(84)-C(85)  | 1.312(13) |
| C(85)-H(85A) | 0.9500    |
| C(85)-H(85B) | 0.9500    |
| C(86)-C(91)  | 1.383(13) |
| C(86)-C(87)  | 1.389(13) |
| C(87)-C(88)  | 1.370(14) |
| C(87)-H(87)  | 0.9500    |
| C(88)-C(89)  | 1.396(15) |
| C(88)-H(88)  | 0.9500    |
| C(89)-C(90)  | 1.369(15) |

|                   |           |
|-------------------|-----------|
| C(89)-H(89)       | 0.9500    |
| C(90)-C(91)       | 1.383(13) |
| C(90)-H(90)       | 0.9500    |
| C(91)-H(91)       | 0.9500    |
| C(92)-C(93)       | 1.389(14) |
| C(92)-C(97)       | 1.408(13) |
| C(93)-C(94)       | 1.378(14) |
| C(93)-H(93)       | 0.9500    |
| C(94)-C(95)       | 1.396(16) |
| C(94)-H(94)       | 0.9500    |
| C(95)-C(96)       | 1.389(16) |
| C(95)-H(95)       | 0.9500    |
| C(96)-C(97)       | 1.378(14) |
| C(96)-H(96)       | 0.9500    |
| C(97)-H(97)       | 0.9500    |
| C(98)-H(98A)      | 0.9800    |
| C(98)-H(98B)      | 0.9800    |
| C(98)-H(98C)      | 0.9800    |
| C(99)-H(99A)      | 0.9800    |
| C(99)-H(99B)      | 0.9800    |
| C(99)-H(99C)      | 0.9800    |
| C(100)-H(10C)     | 0.9800    |
| C(100)-H(10D)     | 0.9800    |
| C(100)-H(10E)     | 0.9800    |
| O(1)-P(1)-N(1)    | 112.3(4)  |
| O(1)-P(1)-C(11)   | 114.9(4)  |
| N(1)-P(1)-C(11)   | 102.5(4)  |
| O(1)-P(1)-C(17)   | 110.0(4)  |
| N(1)-P(1)-C(17)   | 110.4(4)  |
| C(11)-P(1)-C(17)  | 106.3(4)  |
| C(23)-Si(1)-C(24) | 109.9(6)  |
| C(23)-Si(1)-C(25) | 109.3(6)  |
| C(24)-Si(1)-C(25) | 109.2(6)  |
| C(23)-Si(1)-C(8)  | 113.2(5)  |
| C(24)-Si(1)-C(8)  | 104.8(5)  |

|                     |           |
|---------------------|-----------|
| C(25)-Si(1)-C(8)    | 110.3(5)  |
| C(7)-N(1)-P(1)      | 120.6(6)  |
| C(7)-N(1)-H(1N)     | 119.7     |
| P(1)-N(1)-H(1N)     | 119.7     |
| C(2)-C(1)-C(6)      | 119.2(10) |
| C(2)-C(1)-Br(1)     | 121.9(8)  |
| C(6)-C(1)-Br(1)     | 119.0(9)  |
| C(3)-C(2)-C(1)      | 119.8(10) |
| C(3)-C(2)-H(2)      | 120.1     |
| C(1)-C(2)-H(2)      | 120.1     |
| C(2)-C(3)-C(4)      | 122.4(11) |
| C(2)-C(3)-H(3)      | 118.8     |
| C(4)-C(3)-H(3)      | 118.8     |
| C(3)-C(4)-C(5)      | 118.9(10) |
| C(3)-C(4)-H(4)      | 120.6     |
| C(5)-C(4)-H(4)      | 120.6     |
| C(4)-C(5)-C(6)      | 118.8(9)  |
| C(4)-C(5)-C(7)      | 122.0(9)  |
| C(6)-C(5)-C(7)      | 119.1(10) |
| C(1)-C(6)-C(5)      | 120.8(11) |
| C(1)-C(6)-H(6)      | 119.6     |
| C(5)-C(6)-H(6)      | 119.6     |
| N(1)-C(7)-C(5)      | 110.6(7)  |
| N(1)-C(7)-C(8)      | 110.8(7)  |
| C(5)-C(7)-C(8)      | 114.1(7)  |
| N(1)-C(7)-H(7)      | 107.0     |
| C(5)-C(7)-H(7)      | 107.0     |
| C(8)-C(7)-H(7)      | 107.0     |
| C(9)-C(8)-C(7)      | 121.8(8)  |
| C(9)-C(8)-Si(1)     | 115.8(7)  |
| C(7)-C(8)-Si(1)     | 122.1(7)  |
| C(8)-C(9)-C(10)     | 174.9(10) |
| C(9)-C(10)-H(10A)   | 116(8)    |
| C(9)-C(10)-H(10B)   | 103(9)    |
| H(10A)-C(10)-H(10B) | 89(10)    |
| C(16)-C(11)-C(12)   | 119.1(9)  |

|                    |           |
|--------------------|-----------|
| C(16)-C(11)-P(1)   | 120.4(8)  |
| C(12)-C(11)-P(1)   | 120.4(7)  |
| C(13)-C(12)-C(11)  | 120.0(9)  |
| C(13)-C(12)-H(12)  | 120.0     |
| C(11)-C(12)-H(12)  | 120.0     |
| C(12)-C(13)-C(14)  | 120.7(10) |
| C(12)-C(13)-H(13)  | 119.7     |
| C(14)-C(13)-H(13)  | 119.7     |
| C(15)-C(14)-C(13)  | 119.3(10) |
| C(15)-C(14)-H(14)  | 120.4     |
| C(13)-C(14)-H(14)  | 120.4     |
| C(14)-C(15)-C(16)  | 119.6(10) |
| C(14)-C(15)-H(15)  | 120.2     |
| C(16)-C(15)-H(15)  | 120.2     |
| C(11)-C(16)-C(15)  | 121.3(10) |
| C(11)-C(16)-H(16)  | 119.3     |
| C(15)-C(16)-H(16)  | 119.3     |
| C(18)-C(17)-C(22)  | 119.4(9)  |
| C(18)-C(17)-P(1)   | 121.4(8)  |
| C(22)-C(17)-P(1)   | 119.1(8)  |
| C(17)-C(18)-C(19)  | 119.6(11) |
| C(17)-C(18)-H(18)  | 120.2     |
| C(19)-C(18)-H(18)  | 120.2     |
| C(18)-C(19)-C(20)  | 120.5(12) |
| C(18)-C(19)-H(19)  | 119.8     |
| C(20)-C(19)-H(19)  | 119.8     |
| C(21)-C(20)-C(19)  | 119.8(11) |
| C(21)-C(20)-H(20)  | 120.1     |
| C(19)-C(20)-H(20)  | 120.1     |
| C(22)-C(21)-C(20)  | 119.7(11) |
| C(22)-C(21)-H(21)  | 120.2     |
| C(20)-C(21)-H(21)  | 120.2     |
| C(21)-C(22)-C(17)  | 121.1(11) |
| C(21)-C(22)-H(22)  | 119.5     |
| C(17)-C(22)-H(22)  | 119.5     |
| Si(1)-C(23)-H(23A) | 109.5     |

|                     |           |
|---------------------|-----------|
| Si(1)-C(23)-H(23B)  | 109.5     |
| H(23A)-C(23)-H(23B) | 109.5     |
| Si(1)-C(23)-H(23C)  | 109.5     |
| H(23A)-C(23)-H(23C) | 109.5     |
| H(23B)-C(23)-H(23C) | 109.5     |
| Si(1)-C(24)-H(24A)  | 109.5     |
| Si(1)-C(24)-H(24B)  | 109.5     |
| H(24A)-C(24)-H(24B) | 109.5     |
| Si(1)-C(24)-H(24C)  | 109.5     |
| H(24A)-C(24)-H(24C) | 109.5     |
| H(24B)-C(24)-H(24C) | 109.5     |
| Si(1)-C(25)-H(25A)  | 109.5     |
| Si(1)-C(25)-H(25B)  | 109.5     |
| H(25A)-C(25)-H(25B) | 109.5     |
| Si(1)-C(25)-H(25C)  | 109.5     |
| H(25A)-C(25)-H(25C) | 109.5     |
| H(25B)-C(25)-H(25C) | 109.5     |
| Br(2X)-Br(2)-C(26)  | 73.7(8)   |
| Br(2)-Br(2X)-C(26)  | 72.9(7)   |
| O(2)-P(2)-N(2)      | 112.0(4)  |
| O(2)-P(2)-C(42)     | 110.4(4)  |
| N(2)-P(2)-C(42)     | 109.5(4)  |
| O(2)-P(2)-C(36)     | 115.1(4)  |
| N(2)-P(2)-C(36)     | 103.2(4)  |
| C(42)-P(2)-C(36)    | 106.2(4)  |
| C(49)-Si(2)-C(48)   | 108.7(7)  |
| C(49)-Si(2)-C(50)   | 109.7(6)  |
| C(48)-Si(2)-C(50)   | 109.4(6)  |
| C(49)-Si(2)-C(33)   | 108.2(5)  |
| C(48)-Si(2)-C(33)   | 111.8(6)  |
| C(50)-Si(2)-C(33)   | 109.1(4)  |
| C(32)-N(2)-P(2)     | 120.3(6)  |
| C(32)-N(2)-H(2N)    | 119.9     |
| P(2)-N(2)-H(2N)     | 119.9     |
| C(31)-C(26)-C(27)   | 121.7(10) |
| C(31)-C(26)-Br(2)   | 119.1(7)  |



|                     |           |
|---------------------|-----------|
| C(27)-C(26)-Br(2)   | 119.2(8)  |
| C(31)-C(26)-Br(2X)  | 104.2(9)  |
| C(27)-C(26)-Br(2X)  | 124.7(9)  |
| Br(2)-C(26)-Br(2X)  | 33.4(6)   |
| C(28)-C(27)-C(26)   | 118.5(10) |
| C(28)-C(27)-H(27)   | 120.7     |
| C(26)-C(27)-H(27)   | 120.7     |
| C(27)-C(28)-C(29)   | 120.2(9)  |
| C(27)-C(28)-C(32)   | 119.2(9)  |
| C(29)-C(28)-C(32)   | 120.6(9)  |
| C(30)-C(29)-C(28)   | 120.2(10) |
| C(30)-C(29)-H(29)   | 119.9     |
| C(28)-C(29)-H(29)   | 119.9     |
| C(29)-C(30)-C(31)   | 121.0(10) |
| C(29)-C(30)-H(30)   | 119.5     |
| C(31)-C(30)-H(30)   | 119.5     |
| C(26)-C(31)-C(30)   | 118.3(9)  |
| C(26)-C(31)-H(31)   | 120.8     |
| C(30)-C(31)-H(31)   | 120.8     |
| N(2)-C(32)-C(33)    | 111.0(7)  |
| N(2)-C(32)-C(28)    | 110.2(7)  |
| C(33)-C(32)-C(28)   | 111.7(7)  |
| N(2)-C(32)-H(32)    | 107.9     |
| C(33)-C(32)-H(32)   | 107.9     |
| C(28)-C(32)-H(32)   | 107.9     |
| C(34)-C(33)-C(32)   | 121.7(8)  |
| C(34)-C(33)-Si(2)   | 118.1(7)  |
| C(32)-C(33)-Si(2)   | 120.2(7)  |
| C(33)-C(34)-C(35)   | 177.9(10) |
| C(34)-C(35)-H(35A)  | 120.0     |
| C(34)-C(35)-H(35B)  | 120.0     |
| H(35A)-C(35)-H(35B) | 120.0     |
| C(41)-C(36)-C(37)   | 119.5(8)  |
| C(41)-C(36)-P(2)    | 119.6(7)  |
| C(37)-C(36)-P(2)    | 120.7(6)  |
| C(38)-C(37)-C(36)   | 119.6(9)  |

|                     |           |
|---------------------|-----------|
| C(38)-C(37)-H(37)   | 120.2     |
| C(36)-C(37)-H(37)   | 120.2     |
| C(39)-C(38)-C(37)   | 119.9(10) |
| C(39)-C(38)-H(38)   | 120.1     |
| C(37)-C(38)-H(38)   | 120.1     |
| C(40)-C(39)-C(38)   | 120.1(9)  |
| C(40)-C(39)-H(39)   | 120.0     |
| C(38)-C(39)-H(39)   | 120.0     |
| C(39)-C(40)-C(41)   | 120.4(9)  |
| C(39)-C(40)-H(40)   | 119.8     |
| C(41)-C(40)-H(40)   | 119.8     |
| C(36)-C(41)-C(40)   | 120.5(10) |
| C(36)-C(41)-H(41)   | 119.8     |
| C(40)-C(41)-H(41)   | 119.8     |
| C(43)-C(42)-C(47)   | 118.7(9)  |
| C(43)-C(42)-P(2)    | 121.0(7)  |
| C(47)-C(42)-P(2)    | 120.1(8)  |
| C(44)-C(43)-C(42)   | 120.8(10) |
| C(44)-C(43)-H(43)   | 119.6     |
| C(42)-C(43)-H(43)   | 119.6     |
| C(43)-C(44)-C(45)   | 119.9(11) |
| C(43)-C(44)-H(44)   | 120.0     |
| C(45)-C(44)-H(44)   | 120.0     |
| C(44)-C(45)-C(46)   | 120.3(10) |
| C(44)-C(45)-H(45)   | 119.9     |
| C(46)-C(45)-H(45)   | 119.9     |
| C(47)-C(46)-C(45)   | 119.6(10) |
| C(47)-C(46)-H(46)   | 120.2     |
| C(45)-C(46)-H(46)   | 120.2     |
| C(46)-C(47)-C(42)   | 120.6(10) |
| C(46)-C(47)-H(47)   | 119.7     |
| C(42)-C(47)-H(47)   | 119.7     |
| Si(2)-C(48)-H(48A)  | 109.5     |
| Si(2)-C(48)-H(48B)  | 109.5     |
| H(48A)-C(48)-H(48B) | 109.5     |
| Si(2)-C(48)-H(48C)  | 109.5     |

|                     |           |
|---------------------|-----------|
| H(48A)-C(48)-H(48C) | 109.5     |
| H(48B)-C(48)-H(48C) | 109.5     |
| Si(2)-C(49)-H(49A)  | 109.5     |
| Si(2)-C(49)-H(49B)  | 109.5     |
| H(49A)-C(49)-H(49B) | 109.5     |
| Si(2)-C(49)-H(49C)  | 109.5     |
| H(49A)-C(49)-H(49C) | 109.5     |
| H(49B)-C(49)-H(49C) | 109.5     |
| Si(2)-C(50)-H(50A)  | 109.5     |
| Si(2)-C(50)-H(50B)  | 109.5     |
| H(50A)-C(50)-H(50B) | 109.5     |
| Si(2)-C(50)-H(50C)  | 109.5     |
| H(50A)-C(50)-H(50C) | 109.5     |
| H(50B)-C(50)-H(50C) | 109.5     |
| O(3)-P(3)-N(3)      | 112.3(4)  |
| O(3)-P(3)-C(67)     | 110.5(5)  |
| N(3)-P(3)-C(67)     | 110.3(4)  |
| O(3)-P(3)-C(61)     | 113.5(4)  |
| N(3)-P(3)-C(61)     | 104.0(4)  |
| C(67)-P(3)-C(61)    | 105.8(4)  |
| C(75)-Si(3)-C(73)   | 110.5(6)  |
| C(75)-Si(3)-C(74)   | 109.3(6)  |
| C(73)-Si(3)-C(74)   | 109.3(7)  |
| C(75)-Si(3)-C(58)   | 107.8(4)  |
| C(73)-Si(3)-C(58)   | 109.7(5)  |
| C(74)-Si(3)-C(58)   | 110.2(6)  |
| C(57)-N(3)-P(3)     | 120.6(6)  |
| C(57)-N(3)-H(3N)    | 119.7     |
| P(3)-N(3)-H(3N)     | 119.7     |
| C(52)-C(51)-C(56)   | 120.7(10) |
| C(52)-C(51)-Br(3)   | 119.9(7)  |
| C(56)-C(51)-Br(3)   | 119.4(8)  |
| C(51)-C(52)-C(53)   | 119.7(9)  |
| C(51)-C(52)-H(52)   | 120.2     |
| C(53)-C(52)-H(52)   | 120.2     |
| C(54)-C(53)-C(52)   | 120.5(10) |

|                     |           |
|---------------------|-----------|
| C(54)-C(53)-H(53)   | 119.8     |
| C(52)-C(53)-H(53)   | 119.8     |
| C(53)-C(54)-C(55)   | 120.5(10) |
| C(53)-C(54)-H(54)   | 119.7     |
| C(55)-C(54)-H(54)   | 119.7     |
| C(56)-C(55)-C(54)   | 119.1(8)  |
| C(56)-C(55)-C(57)   | 119.7(9)  |
| C(54)-C(55)-C(57)   | 121.0(8)  |
| C(55)-C(56)-C(51)   | 119.4(10) |
| C(55)-C(56)-H(56)   | 120.3     |
| C(51)-C(56)-H(56)   | 120.3     |
| N(3)-C(57)-C(55)    | 111.0(7)  |
| N(3)-C(57)-C(58)    | 111.7(7)  |
| C(55)-C(57)-C(58)   | 113.3(7)  |
| N(3)-C(57)-H(57)    | 106.8     |
| C(55)-C(57)-H(57)   | 106.8     |
| C(58)-C(57)-H(57)   | 106.8     |
| C(59)-C(58)-C(57)   | 122.8(8)  |
| C(59)-C(58)-Si(3)   | 114.3(7)  |
| C(57)-C(58)-Si(3)   | 122.9(6)  |
| C(58)-C(59)-C(60)   | 174.8(11) |
| C(59)-C(60)-H(60A)  | 120.0     |
| C(59)-C(60)-H(60B)  | 120.0     |
| H(60A)-C(60)-H(60B) | 120.0     |
| C(66)-C(61)-C(62)   | 119.9(8)  |
| C(66)-C(61)-P(3)    | 118.3(8)  |
| C(62)-C(61)-P(3)    | 121.8(7)  |
| C(63)-C(62)-C(61)   | 119.6(10) |
| C(63)-C(62)-H(62)   | 120.2     |
| C(61)-C(62)-H(62)   | 120.2     |
| C(64)-C(63)-C(62)   | 120.2(11) |
| C(64)-C(63)-H(63)   | 119.9     |
| C(62)-C(63)-H(63)   | 119.9     |
| C(63)-C(64)-C(65)   | 120.4(10) |
| C(63)-C(64)-H(64)   | 119.8     |
| C(65)-C(64)-H(64)   | 119.8     |

|                     |           |
|---------------------|-----------|
| C(66)-C(65)-C(64)   | 119.4(10) |
| C(66)-C(65)-H(65)   | 120.3     |
| C(64)-C(65)-H(65)   | 120.3     |
| C(61)-C(66)-C(65)   | 120.4(10) |
| C(61)-C(66)-H(66)   | 119.8     |
| C(65)-C(66)-H(66)   | 119.8     |
| C(72)-C(67)-C(68)   | 118.5(9)  |
| C(72)-C(67)-P(3)    | 119.6(8)  |
| C(68)-C(67)-P(3)    | 121.8(8)  |
| C(69)-C(68)-C(67)   | 120.6(10) |
| C(69)-C(68)-H(68)   | 119.7     |
| C(67)-C(68)-H(68)   | 119.7     |
| C(70)-C(69)-C(68)   | 120.2(11) |
| C(70)-C(69)-H(69)   | 119.9     |
| C(68)-C(69)-H(69)   | 119.9     |
| C(69)-C(70)-C(71)   | 120.4(11) |
| C(69)-C(70)-H(70)   | 119.8     |
| C(71)-C(70)-H(70)   | 119.8     |
| C(72)-C(71)-C(70)   | 119.5(10) |
| C(72)-C(71)-H(71)   | 120.2     |
| C(70)-C(71)-H(71)   | 120.2     |
| C(71)-C(72)-C(67)   | 120.7(10) |
| C(71)-C(72)-H(72)   | 119.7     |
| C(67)-C(72)-H(72)   | 119.7     |
| Si(3)-C(73)-H(73A)  | 109.5     |
| Si(3)-C(73)-H(73B)  | 109.5     |
| H(73A)-C(73)-H(73B) | 109.5     |
| Si(3)-C(73)-H(73C)  | 109.5     |
| H(73A)-C(73)-H(73C) | 109.5     |
| H(73B)-C(73)-H(73C) | 109.5     |
| Si(3)-C(74)-H(74A)  | 109.5     |
| Si(3)-C(74)-H(74B)  | 109.5     |
| H(74A)-C(74)-H(74B) | 109.5     |
| Si(3)-C(74)-H(74C)  | 109.5     |
| H(74A)-C(74)-H(74C) | 109.5     |
| H(74B)-C(74)-H(74C) | 109.5     |

|                     |           |
|---------------------|-----------|
| Si(3)-C(75)-H(75A)  | 109.5     |
| Si(3)-C(75)-H(75B)  | 109.5     |
| H(75A)-C(75)-H(75B) | 109.5     |
| Si(3)-C(75)-H(75C)  | 109.5     |
| H(75A)-C(75)-H(75C) | 109.5     |
| H(75B)-C(75)-H(75C) | 109.5     |
| O(4)-P(4)-N(4)      | 112.6(4)  |
| O(4)-P(4)-C(92)     | 110.1(4)  |
| N(4)-P(4)-C(92)     | 109.9(4)  |
| O(4)-P(4)-C(86)     | 114.6(4)  |
| N(4)-P(4)-C(86)     | 103.0(4)  |
| C(92)-P(4)-C(86)    | 106.2(4)  |
| C(100)-Si(4)-C(98)  | 111.4(6)  |
| C(100)-Si(4)-C(99)  | 109.2(5)  |
| C(98)-Si(4)-C(99)   | 107.5(7)  |
| C(100)-Si(4)-C(83)  | 109.3(5)  |
| C(98)-Si(4)-C(83)   | 108.5(5)  |
| C(99)-Si(4)-C(83)   | 110.9(5)  |
| C(82)-N(4)-P(4)     | 119.6(6)  |
| C(82)-N(4)-H(4N)    | 120.2     |
| P(4)-N(4)-H(4N)     | 120.2     |
| C(77)-C(76)-C(81)   | 121.9(10) |
| C(77)-C(76)-Br(4)   | 119.4(7)  |
| C(81)-C(76)-Br(4)   | 118.6(8)  |
| C(76)-C(77)-C(78)   | 118.0(10) |
| C(76)-C(77)-H(77)   | 121.0     |
| C(78)-C(77)-H(77)   | 121.0     |
| C(79)-C(78)-C(77)   | 121.5(11) |
| C(79)-C(78)-H(78)   | 119.2     |
| C(77)-C(78)-H(78)   | 119.2     |
| C(78)-C(79)-C(80)   | 120.7(10) |
| C(78)-C(79)-H(79)   | 119.7     |
| C(80)-C(79)-H(79)   | 119.7     |
| C(81)-C(80)-C(79)   | 119.5(9)  |
| C(81)-C(80)-C(82)   | 120.0(9)  |
| C(79)-C(80)-C(82)   | 120.4(9)  |

|                     |           |
|---------------------|-----------|
| C(80)-C(81)-C(76)   | 118.4(10) |
| C(80)-C(81)-H(81)   | 120.8     |
| C(76)-C(81)-H(81)   | 120.8     |
| N(4)-C(82)-C(83)    | 112.3(7)  |
| N(4)-C(82)-C(80)    | 110.5(7)  |
| C(83)-C(82)-C(80)   | 113.4(7)  |
| N(4)-C(82)-H(82)    | 106.8     |
| C(83)-C(82)-H(82)   | 106.8     |
| C(80)-C(82)-H(82)   | 106.8     |
| C(84)-C(83)-C(82)   | 121.3(8)  |
| C(84)-C(83)-Si(4)   | 118.1(7)  |
| C(82)-C(83)-Si(4)   | 120.5(6)  |
| C(83)-C(84)-C(85)   | 177.0(11) |
| C(84)-C(85)-H(85A)  | 120.0     |
| C(84)-C(85)-H(85B)  | 120.0     |
| H(85A)-C(85)-H(85B) | 120.0     |
| C(91)-C(86)-C(87)   | 118.9(9)  |
| C(91)-C(86)-P(4)    | 117.7(7)  |
| C(87)-C(86)-P(4)    | 123.3(7)  |
| C(88)-C(87)-C(86)   | 119.7(9)  |
| C(88)-C(87)-H(87)   | 120.1     |
| C(86)-C(87)-H(87)   | 120.1     |
| C(87)-C(88)-C(89)   | 122.4(11) |
| C(87)-C(88)-H(88)   | 118.8     |
| C(89)-C(88)-H(88)   | 118.8     |
| C(90)-C(89)-C(88)   | 116.7(10) |
| C(90)-C(89)-H(89)   | 121.7     |
| C(88)-C(89)-H(89)   | 121.7     |
| C(89)-C(90)-C(91)   | 122.4(10) |
| C(89)-C(90)-H(90)   | 118.8     |
| C(91)-C(90)-H(90)   | 118.8     |
| C(86)-C(91)-C(90)   | 119.9(10) |
| C(86)-C(91)-H(91)   | 120.1     |
| C(90)-C(91)-H(91)   | 120.1     |
| C(93)-C(92)-C(97)   | 118.9(9)  |
| C(93)-C(92)-P(4)    | 121.1(8)  |

|                      |           |
|----------------------|-----------|
| C(97)-C(92)-P(4)     | 119.8(8)  |
| C(94)-C(93)-C(92)    | 120.6(10) |
| C(94)-C(93)-H(93)    | 119.7     |
| C(92)-C(93)-H(93)    | 119.7     |
| C(93)-C(94)-C(95)    | 120.6(11) |
| C(93)-C(94)-H(94)    | 119.7     |
| C(95)-C(94)-H(94)    | 119.7     |
| C(96)-C(95)-C(94)    | 118.9(10) |
| C(96)-C(95)-H(95)    | 120.6     |
| C(94)-C(95)-H(95)    | 120.6     |
| C(97)-C(96)-C(95)    | 120.9(10) |
| C(97)-C(96)-H(96)    | 119.5     |
| C(95)-C(96)-H(96)    | 119.5     |
| C(96)-C(97)-C(92)    | 120.0(11) |
| C(96)-C(97)-H(97)    | 120.0     |
| C(92)-C(97)-H(97)    | 120.0     |
| Si(4)-C(98)-H(98A)   | 109.5     |
| Si(4)-C(98)-H(98B)   | 109.5     |
| H(98A)-C(98)-H(98B)  | 109.5     |
| Si(4)-C(98)-H(98C)   | 109.5     |
| H(98A)-C(98)-H(98C)  | 109.5     |
| H(98B)-C(98)-H(98C)  | 109.5     |
| Si(4)-C(99)-H(99A)   | 109.5     |
| Si(4)-C(99)-H(99B)   | 109.5     |
| H(99A)-C(99)-H(99B)  | 109.5     |
| Si(4)-C(99)-H(99C)   | 109.5     |
| H(99A)-C(99)-H(99C)  | 109.5     |
| H(99B)-C(99)-H(99C)  | 109.5     |
| Si(4)-C(100)-H(10C)  | 109.5     |
| Si(4)-C(100)-H(10D)  | 109.5     |
| H(10C)-C(100)-H(10D) | 109.5     |
| Si(4)-C(100)-H(10E)  | 109.5     |
| H(10C)-C(100)-H(10E) | 109.5     |
| H(10D)-C(100)-H(10E) | 109.5     |

---

Symmetry transformations used to generate equivalent atoms:



**Table S22.** Anisotropic displacement parameters ( $\text{\AA}^2 \times 10^3$ ) for  $\text{C}_{25}\text{H}_{27}\text{BrNOPSi}$ . The anisotropic displacement factor exponent takes the form:  $-2p^2[ h^2 a^{*2}U^{11} + \dots + 2 h k a^* b^* U^{12} ]$

|       | U <sup>11</sup> | U <sup>22</sup> | U <sup>33</sup> | U <sup>23</sup> | U <sup>13</sup> | U <sup>12</sup> |
|-------|-----------------|-----------------|-----------------|-----------------|-----------------|-----------------|
| Br(1) | 41(1)           | 89(1)           | 36(1)           | 4(1)            | -6(1)           | -18(1)          |
| P(1)  | 25(1)           | 23(2)           | 27(1)           | 0(1)            | 4(1)            | 1(1)            |
| Si(1) | 30(1)           | 33(2)           | 28(1)           | -5(1)           | 6(1)            | 3(1)            |
| O(1)  | 39(4)           | 23(4)           | 34(3)           | 4(3)            | 8(3)            | 1(3)            |
| N(1)  | 22(4)           | 35(5)           | 20(3)           | -5(3)           | 6(3)            | -1(3)           |
| C(1)  | 28(5)           | 62(7)           | 20(4)           | 0(5)            | 6(3)            | -1(5)           |
| C(2)  | 42(6)           | 60(7)           | 27(5)           | 1(5)            | -2(4)           | 13(5)           |
| C(3)  | 58(7)           | 34(7)           | 33(5)           | 3(5)            | 9(5)            | 5(5)            |
| C(4)  | 46(6)           | 31(6)           | 27(5)           | 0(4)            | 4(4)            | 1(5)            |
| C(5)  | 27(5)           | 35(6)           | 23(4)           | -6(4)           | 7(3)            | 7(4)            |
| C(6)  | 32(5)           | 41(6)           | 35(5)           | -2(5)           | 8(4)            | 1(4)            |
| C(7)  | 34(5)           | 19(6)           | 24(4)           | -2(4)           | 10(3)           | 1(4)            |
| C(8)  | 28(5)           | 25(6)           | 32(4)           | 0(4)            | 3(3)            | 3(4)            |
| C(9)  | 27(5)           | 39(7)           | 29(5)           | -13(4)          | 8(4)            | 3(4)            |
| C(10) | 36(7)           | 77(11)          | 37(6)           | -24(6)          | 8(5)            | -5(6)           |
| C(11) | 34(5)           | 28(6)           | 26(4)           | 3(4)            | 4(3)            | 3(4)            |
| C(12) | 35(5)           | 35(7)           | 33(5)           | 8(4)            | 6(4)            | 0(5)            |
| C(13) | 32(5)           | 46(8)           | 31(5)           | 3(5)            | -2(4)           | -1(5)           |
| C(14) | 38(6)           | 65(9)           | 33(5)           | -8(6)           | 3(4)            | 6(6)            |
| C(15) | 39(6)           | 82(11)          | 35(5)           | -10(6)          | 8(5)            | -8(6)           |
| C(16) | 42(6)           | 69(9)           | 28(5)           | 0(5)            | 10(4)           | -9(6)           |
| C(17) | 27(4)           | 28(5)           | 28(4)           | 1(4)            | 9(3)            | -3(4)           |
| C(18) | 34(5)           | 32(6)           | 46(6)           | 7(5)            | 5(4)            | -1(4)           |
| C(19) | 43(7)           | 46(7)           | 62(7)           | 5(6)            | 2(5)            | 13(5)           |
| C(20) | 34(6)           | 67(8)           | 49(7)           | 11(6)           | -1(5)           | 7(5)            |
| C(21) | 24(5)           | 64(7)           | 51(6)           | 5(6)            | 4(4)            | -8(5)           |
| C(22) | 28(5)           | 32(6)           | 35(5)           | -5(4)           | 2(4)            | -8(4)           |
| C(23) | 49(7)           | 93(12)          | 39(5)           | -20(6)          | 12(4)           | 2(6)            |
| C(24) | 75(8)           | 43(7)           | 51(6)           | -6(6)           | 15(6)           | 22(6)           |
| C(25) | 60(8)           | 70(9)           | 40(6)           | -8(6)           | 23(5)           | -3(6)           |
| Br(2) | 53(1)           | 35(1)           | 37(1)           | -3(1)           | -21(1)          | 14(1)           |

|       |       |         |       |        |        |        |
|-------|-------|---------|-------|--------|--------|--------|
| P(2)  | 22(1) | 22(2)   | 25(1) | -1(1)  | 4(1)   | -1(1)  |
| Si(2) | 26(2) | 59(2)   | 26(1) | 3(1)   | 6(1)   | 0(1)   |
| O(2)  | 30(4) | 24(4)   | 31(3) | -4(3)  | 2(3)   | -1(3)  |
| N(2)  | 18(4) | 24(5)   | 22(3) | 5(3)   | 3(3)   | 0(3)   |
| C(26) | 35(5) | 32(5)   | 25(4) | -3(4)  | -4(3)  | 5(5)   |
| C(27) | 37(5) | 33(6)   | 29(4) | -4(4)  | 3(3)   | 0(4)   |
| C(28) | 15(4) | 33(5)   | 22(4) | 1(4)   | 5(3)   | 1(4)   |
| C(29) | 39(6) | 33(6)   | 37(5) | 2(5)   | -6(4)  | 3(5)   |
| C(30) | 47(6) | 19(6)   | 36(5) | 1(4)   | -3(4)  | -6(5)  |
| C(31) | 27(5) | 37(6)   | 31(5) | -8(4)  | 1(4)   | -7(4)  |
| C(32) | 26(5) | 27(6)   | 29(4) | -1(4)  | 5(3)   | 3(4)   |
| C(33) | 15(4) | 29(6)   | 32(4) | -1(4)  | 3(3)   | -2(4)  |
| C(34) | 19(5) | 43(7)   | 32(5) | 1(4)   | 6(4)   | 3(4)   |
| C(35) | 24(6) | 56(9)   | 57(7) | 25(6)  | 12(5)  | 6(5)   |
| C(36) | 31(5) | 22(6)   | 25(4) | -5(4)  | 5(3)   | -2(4)  |
| C(37) | 29(5) | 39(7)   | 27(4) | -2(4)  | 5(4)   | -1(5)  |
| C(38) | 46(6) | 38(7)   | 26(5) | 1(5)   | 0(4)   | -8(5)  |
| C(39) | 54(6) | 37(7)   | 27(5) | 3(5)   | 3(4)   | -16(5) |
| C(40) | 50(6) | 60(9)   | 33(5) | -10(5) | 16(4)  | -10(6) |
| C(41) | 33(5) | 58(8)   | 32(4) | -4(5)  | 5(4)   | -2(5)  |
| C(42) | 22(4) | 29(5)   | 23(4) | 2(4)   | 2(3)   | -2(4)  |
| C(43) | 27(5) | 27(6)   | 45(6) | 0(5)   | -1(4)  | 1(4)   |
| C(44) | 39(6) | 28(6)   | 54(6) | -4(5)  | -1(5)  | -11(5) |
| C(45) | 25(6) | 61(8)   | 49(6) | -1(6)  | -4(4)  | -3(5)  |
| C(46) | 26(5) | 58(7)   | 46(6) | 7(6)   | -6(4)  | 5(5)   |
| C(47) | 32(5) | 29(6)   | 32(5) | 0(4)   | 1(4)   | 6(4)   |
| C(48) | 43(7) | 155(15) | 42(6) | -32(8) | 2(5)   | 8(8)   |
| C(49) | 56(8) | 78(8)   | 80(9) | 44(7)  | 29(7)  | 5(7)   |
| C(50) | 33(5) | 77(10)  | 44(6) | 2(6)   | 5(4)   | -4(6)  |
| Br(3) | 49(1) | 42(1)   | 45(1) | -9(1)  | -15(1) | 13(1)  |
| P(3)  | 32(1) | 22(2)   | 24(1) | 0(1)   | 3(1)   | -1(1)  |
| Si(3) | 35(2) | 45(2)   | 28(1) | 5(1)   | 5(1)   | 9(1)   |
| O(3)  | 43(4) | 23(4)   | 32(3) | 0(3)   | 5(3)   | -1(3)  |
| N(3)  | 37(4) | 25(5)   | 18(3) | 0(3)   | 1(3)   | -2(4)  |
| C(51) | 30(5) | 37(6)   | 26(4) | -7(4)  | 6(3)   | 3(4)   |
| C(52) | 38(6) | 31(6)   | 31(5) | -5(4)  | 1(4)   | -1(4)  |

|       |        |         |       |        |        |        |
|-------|--------|---------|-------|--------|--------|--------|
| C(53) | 42(6)  | 26(6)   | 35(5) | -10(5) | -4(4)  | 1(5)   |
| C(54) | 35(6)  | 30(6)   | 35(5) | -5(5)  | -4(4)  | -2(5)  |
| C(55) | 24(5)  | 31(5)   | 14(4) | -2(4)  | 3(3)   | 1(4)   |
| C(56) | 33(5)  | 33(6)   | 30(4) | -8(4)  | 7(3)   | 2(4)   |
| C(57) | 32(5)  | 20(5)   | 23(4) | 1(4)   | 4(3)   | -4(4)  |
| C(58) | 31(5)  | 18(5)   | 31(4) | 3(4)   | -1(3)  | -1(4)  |
| C(59) | 32(6)  | 42(8)   | 45(6) | 14(5)  | 1(4)   | -2(5)  |
| C(60) | 25(6)  | 100(12) | 82(9) | 69(9)  | 22(6)  | 19(7)  |
| C(61) | 39(5)  | 18(6)   | 28(4) | -2(4)  | 4(3)   | -9(4)  |
| C(62) | 54(6)  | 31(7)   | 26(4) | -2(4)  | 5(4)   | 0(5)   |
| C(63) | 68(7)  | 18(6)   | 25(5) | 6(4)   | -2(4)  | -4(5)  |
| C(64) | 62(7)  | 29(7)   | 37(5) | 5(5)   | 4(4)   | -11(5) |
| C(65) | 65(7)  | 43(8)   | 29(5) | -2(5)  | 17(5)  | -8(6)  |
| C(66) | 42(6)  | 41(7)   | 34(4) | -2(5)  | 4(4)   | -9(5)  |
| C(67) | 45(5)  | 22(5)   | 18(4) | -5(4)  | 6(3)   | 0(4)   |
| C(68) | 38(5)  | 19(5)   | 44(6) | 1(5)   | 8(4)   | 0(4)   |
| C(69) | 42(6)  | 40(7)   | 44(6) | -5(5)  | 5(5)   | -13(5) |
| C(70) | 28(6)  | 61(7)   | 44(6) | -16(6) | 8(4)   | -6(5)  |
| C(71) | 36(6)  | 58(7)   | 41(6) | 3(6)   | -2(4)  | 8(5)   |
| C(72) | 35(5)  | 27(6)   | 40(5) | 0(5)   | 3(4)   | 2(4)   |
| C(73) | 48(6)  | 73(9)   | 64(7) | 39(7)  | 13(5)  | -2(7)  |
| C(74) | 80(10) | 103(12) | 68(9) | -26(8) | 19(7)  | 21(9)  |
| C(75) | 39(6)  | 97(12)  | 57(7) | 29(7)  | 10(5)  | -11(6) |
| Br(4) | 49(1)  | 52(1)   | 50(1) | 0(1)   | -12(1) | -16(1) |
| P(4)  | 27(1)  | 16(1)   | 31(1) | 0(1)   | 7(1)   | -1(1)  |
| Si(4) | 30(2)  | 39(2)   | 39(1) | -14(1) | 12(1)  | -7(1)  |
| O(4)  | 34(4)  | 13(4)   | 30(3) | -1(3)  | 9(3)   | -3(3)  |
| N(4)  | 26(4)  | 20(4)   | 26(3) | -3(3)  | 6(3)   | -7(3)  |
| C(76) | 26(5)  | 44(6)   | 34(5) | 5(5)   | 1(4)   | -4(4)  |
| C(77) | 30(6)  | 36(6)   | 44(6) | 2(5)   | -1(4)  | 4(4)   |
| C(78) | 48(7)  | 17(6)   | 57(7) | 1(5)   | -7(5)  | -3(5)  |
| C(79) | 40(6)  | 29(6)   | 49(6) | -6(5)  | 0(4)   | -1(5)  |
| C(80) | 19(4)  | 33(6)   | 26(4) | 2(4)   | 7(3)   | -2(4)  |
| C(81) | 36(5)  | 21(5)   | 28(4) | -3(4)  | 4(3)   | -5(4)  |
| C(82) | 34(5)  | 23(6)   | 23(4) | -2(4)  | 6(3)   | -2(4)  |
| C(83) | 28(4)  | 13(5)   | 33(4) | 2(4)   | 1(3)   | 2(4)   |

|        |       |         |         |        |       |        |
|--------|-------|---------|---------|--------|-------|--------|
| C(84)  | 36(6) | 30(6)   | 28(5)   | -5(4)  | 8(4)  | -7(4)  |
| C(85)  | 24(6) | 83(11)  | 44(6)   | -21(6) | 7(4)  | -13(6) |
| C(86)  | 36(5) | 16(6)   | 31(4)   | -5(4)  | 4(3)  | 3(4)   |
| C(87)  | 37(6) | 39(7)   | 35(5)   | 8(5)   | 3(4)  | -11(5) |
| C(88)  | 59(7) | 39(8)   | 32(5)   | 3(5)   | 3(5)  | -10(6) |
| C(89)  | 55(7) | 31(7)   | 34(5)   | 0(5)   | 8(4)  | 11(5)  |
| C(90)  | 49(6) | 46(8)   | 35(5)   | -4(5)  | 15(5) | 15(5)  |
| C(91)  | 32(5) | 45(7)   | 39(5)   | -5(5)  | 7(4)  | 6(5)   |
| C(92)  | 29(4) | 24(5)   | 29(4)   | -3(4)  | 10(3) | 0(4)   |
| C(93)  | 29(5) | 25(6)   | 60(7)   | 4(5)   | -4(5) | -7(4)  |
| C(94)  | 45(7) | 27(6)   | 77(8)   | 9(6)   | 4(6)  | 14(5)  |
| C(95)  | 24(5) | 61(8)   | 48(6)   | 7(6)   | 2(4)  | 7(5)   |
| C(96)  | 24(5) | 64(8)   | 51(6)   | -10(6) | 4(4)  | -9(5)  |
| C(97)  | 33(5) | 38(7)   | 42(5)   | -2(5)  | 0(4)  | -9(4)  |
| C(98)  | 53(8) | 71(9)   | 118(11) | -61(8) | 34(8) | -18(7) |
| C(99)  | 47(7) | 107(11) | 37(6)   | 14(7)  | 9(5)  | -8(7)  |
| C(100) | 41(5) | 48(8)   | 62(7)   | -5(6)  | 15(5) | -5(5)  |

---

**Table S23.** Hydrogen coordinates ( $\times 10^4$ ) and isotropic displacement parameters ( $\text{\AA}^2 \times 10^3$ ) for  $\text{C}_{25}\text{H}_{27}\text{BrNOPSi}$ 

|        | x         | y         | z        | U(eq) |
|--------|-----------|-----------|----------|-------|
| H(1N)  | -602      | 5582      | 5091     | 30    |
| H(2)   | 1251      | 4776      | 7295     | 52    |
| H(3)   | 405       | 3451      | 6895     | 50    |
| H(4)   | -449      | 4242      | 6259     | 41    |
| H(6)   | 427       | 7825      | 6413     | 43    |
| H(7)   | -529      | 7618      | 5816     | 30    |
| H(10A) | -2310(60) | 5530(130) | 4820(50) | 60    |
| H(10B) | -1860(60) | 4690(130) | 4910(50) | 60    |
| H(12)  | -913      | 6111      | 4241     | 41    |
| H(13)  | -1050     | 5407      | 3340     | 44    |
| H(14)  | -116      | 5269      | 2843     | 55    |
| H(15)  | 960       | 5817      | 3266     | 62    |
| H(16)  | 1092      | 6526      | 4176     | 55    |
| H(18)  | 885       | 4479      | 5157     | 44    |
| H(19)  | 1934      | 3805      | 5597     | 61    |
| H(20)  | 2723      | 5348      | 5972     | 61    |
| H(21)  | 2443      | 7566      | 5943     | 56    |
| H(22)  | 1395      | 8232      | 5518     | 38    |
| H(23A) | -809      | 7965      | 6903     | 90    |
| H(23B) | -1005     | 6690      | 7225     | 90    |
| H(23C) | -1429     | 8009      | 7264     | 90    |
| H(24A) | -2445     | 8852      | 6428     | 83    |
| H(24B) | -2618     | 8084      | 5864     | 83    |
| H(24C) | -1951     | 8967      | 5962     | 83    |
| H(25A) | -2105     | 4971      | 6813     | 83    |
| H(25B) | -2656     | 5400      | 6320     | 83    |
| H(25C) | -2640     | 6095      | 6903     | 83    |
| H(2N)  | 10599     | 902       | 9955     | 25    |
| H(27)  | 9821      | 3301      | 8494     | 40    |
| H(29)  | 10207     | -474      | 8904     | 45    |
| H(30)  | 9398      | -1150     | 8210     | 42    |

|        |       |       |       |     |
|--------|-------|-------|-------|-----|
| H(31)  | 8745  | 378   | 7677  | 38  |
| H(32)  | 10609 | 2913  | 9237  | 32  |
| H(35A) | 12481 | -65   | 9927  | 54  |
| H(35B) | 11789 | -424  | 10204 | 54  |
| H(37)  | 10822 | 1286  | 10772 | 38  |
| H(38)  | 10927 | 772   | 11705 | 44  |
| H(39)  | 9994  | 999   | 12194 | 47  |
| H(40)  | 8968  | 1704  | 11757 | 56  |
| H(41)  | 8853  | 2186  | 10827 | 49  |
| H(43)  | 9133  | -316  | 9999  | 40  |
| H(44)  | 8169  | -1282 | 9550  | 49  |
| H(45)  | 7394  | -27   | 8983  | 55  |
| H(46)  | 7602  | 2196  | 8848  | 53  |
| H(47)  | 8580  | 3152  | 9280  | 38  |
| H(48A) | 10952 | 1480  | 7816  | 120 |
| H(48B) | 11338 | 170   | 8023  | 120 |
| H(48C) | 11701 | 1203  | 7667  | 120 |
| H(49A) | 11976 | 4036  | 8260  | 105 |
| H(49B) | 11689 | 4140  | 8839  | 105 |
| H(49C) | 11181 | 3877  | 8298  | 105 |
| H(50A) | 12890 | 1761  | 8398  | 77  |
| H(50B) | 12722 | 633   | 8811  | 77  |
| H(50C) | 12866 | 2087  | 9031  | 77  |
| H(3N)  | 5441  | 817   | 2477  | 32  |
| H(52)  | 3608  | 91    | 236   | 40  |
| H(53)  | 4453  | -1301 | 644   | 42  |
| H(54)  | 5283  | -515  | 1301  | 41  |
| H(56)  | 4464  | 3107  | 1130  | 38  |
| H(57)  | 5407  | 2831  | 1755  | 30  |
| H(60A) | 7379  | -106  | 2347  | 82  |
| H(60B) | 6811  | -114  | 2784  | 82  |
| H(62)  | 5634  | 921   | 3293  | 44  |
| H(63)  | 5763  | 573   | 4234  | 45  |
| H(64)  | 4886  | 1076  | 4746  | 51  |
| H(65)  | 3883  | 2028  | 4326  | 54  |
| H(66)  | 3747  | 2360  | 3382  | 47  |

|        |      |       |      |     |
|--------|------|-------|------|-----|
| H(68)  | 4028 | -482  | 2456 | 40  |
| H(69)  | 3025 | -1401 | 2052 | 51  |
| H(70)  | 2188 | -94   | 1599 | 53  |
| H(71)  | 2350 | 2161  | 1538 | 55  |
| H(72)  | 3353 | 3100  | 1948 | 41  |
| H(73A) | 6135 | 4021  | 916  | 92  |
| H(73B) | 5651 | 2924  | 619  | 92  |
| H(73C) | 6323 | 3357  | 365  | 92  |
| H(74A) | 6914 | 747   | 358  | 125 |
| H(74B) | 6237 | 150   | 552  | 125 |
| H(74C) | 6957 | -169  | 886  | 125 |
| H(75A) | 7688 | 2790  | 1054 | 96  |
| H(75B) | 7698 | 1848  | 1573 | 96  |
| H(75C) | 7403 | 3297  | 1598 | 96  |
| H(4N)  | 4319 | 5807  | 2489 | 28  |
| H(77)  | 6362 | 5136  | 4638 | 45  |
| H(78)  | 5520 | 3722  | 4237 | 50  |
| H(79)  | 4671 | 4466  | 3609 | 48  |
| H(81)  | 5381 | 8170  | 3821 | 34  |
| H(82)  | 4426 | 7845  | 3201 | 32  |
| H(85A) | 2362 | 5717  | 2522 | 60  |
| H(85B) | 2953 | 4752  | 2330 | 60  |
| H(87)  | 4033 | 6075  | 1656 | 44  |
| H(88)  | 3878 | 5564  | 739  | 52  |
| H(89)  | 4750 | 5841  | 180  | 47  |
| H(90)  | 5790 | 6606  | 585  | 52  |
| H(91)  | 5967 | 7106  | 1507 | 46  |
| H(93)  | 5739 | 4529  | 2387 | 46  |
| H(94)  | 6753 | 3576  | 2741 | 60  |
| H(95)  | 7610 | 4840  | 3223 | 53  |
| H(96)  | 7418 | 7062  | 3360 | 56  |
| H(97)  | 6402 | 8025  | 3012 | 45  |
| H(98A) | 3693 | 9140  | 3923 | 119 |
| H(98B) | 4234 | 8356  | 4330 | 119 |
| H(98C) | 3532 | 8807  | 4529 | 119 |
| H(99A) | 4108 | 5657  | 4568 | 95  |

|        |      |      |      |    |
|--------|------|------|------|----|
| H(99B) | 3439 | 4841 | 4368 | 95 |
| H(99C) | 3425 | 5919 | 4837 | 95 |
| H(10C) | 2270 | 7272 | 4220 | 74 |
| H(10D) | 2247 | 6236 | 3732 | 74 |
| H(10E) | 2305 | 7762 | 3607 | 74 |

---



**Table S24.** Torsion angles [°] for C<sub>25</sub>H<sub>27</sub>BrNOPSi

|                        |            |
|------------------------|------------|
| O(1)-P(1)-N(1)-C(7)    | -43.8(8)   |
| C(11)-P(1)-N(1)-C(7)   | -167.6(7)  |
| C(17)-P(1)-N(1)-C(7)   | 79.4(8)    |
| C(6)-C(1)-C(2)-C(3)    | 1.2(14)    |
| Br(1)-C(1)-C(2)-C(3)   | 179.3(7)   |
| C(1)-C(2)-C(3)-C(4)    | -0.7(16)   |
| C(2)-C(3)-C(4)-C(5)    | 1.6(15)    |
| C(3)-C(4)-C(5)-C(6)    | -3.1(13)   |
| C(3)-C(4)-C(5)-C(7)    | 173.9(8)   |
| C(2)-C(1)-C(6)-C(5)    | -2.8(13)   |
| Br(1)-C(1)-C(6)-C(5)   | 179.1(6)   |
| C(4)-C(5)-C(6)-C(1)    | 3.7(13)    |
| C(7)-C(5)-C(6)-C(1)    | -173.4(8)  |
| P(1)-N(1)-C(7)-C(5)    | -79.6(9)   |
| P(1)-N(1)-C(7)-C(8)    | 152.8(7)   |
| C(4)-C(5)-C(7)-N(1)    | -76.1(10)  |
| C(6)-C(5)-C(7)-N(1)    | 100.9(9)   |
| C(4)-C(5)-C(7)-C(8)    | 49.5(11)   |
| C(6)-C(5)-C(7)-C(8)    | -133.4(9)  |
| N(1)-C(7)-C(8)-C(9)    | 4.8(13)    |
| C(5)-C(7)-C(8)-C(9)    | -120.8(11) |
| N(1)-C(7)-C(8)-Si(1)   | -169.1(6)  |
| C(5)-C(7)-C(8)-Si(1)   | 65.3(11)   |
| C(23)-Si(1)-C(8)-C(9)  | 164.7(9)   |
| C(24)-Si(1)-C(8)-C(9)  | -75.5(10)  |
| C(25)-Si(1)-C(8)-C(9)  | 41.9(10)   |
| C(23)-Si(1)-C(8)-C(7)  | -21.0(10)  |
| C(24)-Si(1)-C(8)-C(7)  | 98.7(8)    |
| C(25)-Si(1)-C(8)-C(7)  | -143.8(8)  |
| O(1)-P(1)-C(11)-C(16)  | 86.5(10)   |
| N(1)-P(1)-C(11)-C(16)  | -151.4(9)  |
| C(17)-P(1)-C(11)-C(16) | -35.5(11)  |
| O(1)-P(1)-C(11)-C(12)  | -90.4(9)   |
| N(1)-P(1)-C(11)-C(12)  | 31.6(9)    |

|                          |            |
|--------------------------|------------|
| C(17)-P(1)-C(11)-C(12)   | 147.5(8)   |
| C(16)-C(11)-C(12)-C(13)  | 0.4(16)    |
| P(1)-C(11)-C(12)-C(13)   | 177.4(8)   |
| C(11)-C(12)-C(13)-C(14)  | -0.4(17)   |
| C(12)-C(13)-C(14)-C(15)  | 0.4(19)    |
| C(13)-C(14)-C(15)-C(16)  | 0(2)       |
| C(12)-C(11)-C(16)-C(15)  | -0.4(18)   |
| P(1)-C(11)-C(16)-C(15)   | -177.4(10) |
| C(14)-C(15)-C(16)-C(11)  | 0(2)       |
| O(1)-P(1)-C(17)-C(18)    | 177.2(7)   |
| N(1)-P(1)-C(17)-C(18)    | 52.7(9)    |
| C(11)-P(1)-C(17)-C(18)   | -57.7(9)   |
| O(1)-P(1)-C(17)-C(22)    | 1.3(8)     |
| N(1)-P(1)-C(17)-C(22)    | -123.2(7)  |
| C(11)-P(1)-C(17)-C(22)   | 126.3(7)   |
| C(22)-C(17)-C(18)-C(19)  | -0.9(14)   |
| P(1)-C(17)-C(18)-C(19)   | -176.8(8)  |
| C(17)-C(18)-C(19)-C(20)  | -0.6(16)   |
| C(18)-C(19)-C(20)-C(21)  | 1.6(17)    |
| C(19)-C(20)-C(21)-C(22)  | -1.1(16)   |
| C(20)-C(21)-C(22)-C(17)  | -0.4(15)   |
| C(18)-C(17)-C(22)-C(21)  | 1.4(13)    |
| P(1)-C(17)-C(22)-C(21)   | 177.5(7)   |
| O(2)-P(2)-N(2)-C(32)     | -39.7(8)   |
| C(42)-P(2)-N(2)-C(32)    | 83.1(7)    |
| C(36)-P(2)-N(2)-C(32)    | -164.1(7)  |
| C(31)-C(26)-C(27)-C(28)  | -0.6(13)   |
| Br(2)-C(26)-C(27)-C(28)  | 179.7(6)   |
| Br(2X)-C(26)-C(27)-C(28) | 140.6(10)  |
| C(26)-C(27)-C(28)-C(29)  | 1.8(13)    |
| C(26)-C(27)-C(28)-C(32)  | -175.8(7)  |
| C(27)-C(28)-C(29)-C(30)  | -0.8(14)   |
| C(32)-C(28)-C(29)-C(30)  | 176.8(8)   |
| C(28)-C(29)-C(30)-C(31)  | -1.4(16)   |
| C(27)-C(26)-C(31)-C(30)  | -1.5(14)   |
| Br(2)-C(26)-C(31)-C(30)  | 178.2(7)   |

|                          |            |
|--------------------------|------------|
| Br(2X)-C(26)-C(31)-C(30) | -149.4(9)  |
| C(29)-C(30)-C(31)-C(26)  | 2.5(15)    |
| P(2)-N(2)-C(32)-C(33)    | 163.8(6)   |
| P(2)-N(2)-C(32)-C(28)    | -71.9(9)   |
| C(27)-C(28)-C(32)-N(2)   | 115.8(9)   |
| C(29)-C(28)-C(32)-N(2)   | -61.8(11)  |
| C(27)-C(28)-C(32)-C(33)  | -120.4(9)  |
| C(29)-C(28)-C(32)-C(33)  | 62.1(11)   |
| N(2)-C(32)-C(33)-C(34)   | 1.7(14)    |
| C(28)-C(32)-C(33)-C(34)  | -121.7(10) |
| N(2)-C(32)-C(33)-Si(2)   | -174.6(6)  |
| C(28)-C(32)-C(33)-Si(2)  | 62.0(10)   |
| C(49)-Si(2)-C(33)-C(34)  | -130.8(9)  |
| C(48)-Si(2)-C(33)-C(34)  | 109.6(10)  |
| C(50)-Si(2)-C(33)-C(34)  | -11.5(10)  |
| C(49)-Si(2)-C(33)-C(32)  | 45.7(9)    |
| C(48)-Si(2)-C(33)-C(32)  | -73.9(10)  |
| C(50)-Si(2)-C(33)-C(32)  | 165.0(8)   |
| O(2)-P(2)-C(36)-C(41)    | 74.4(10)   |
| N(2)-P(2)-C(36)-C(41)    | -163.3(9)  |
| C(42)-P(2)-C(36)-C(41)   | -48.1(10)  |
| O(2)-P(2)-C(36)-C(37)    | -100.9(9)  |
| N(2)-P(2)-C(36)-C(37)    | 21.4(9)    |
| C(42)-P(2)-C(36)-C(37)   | 136.6(8)   |
| C(41)-C(36)-C(37)-C(38)  | 1.3(16)    |
| P(2)-C(36)-C(37)-C(38)   | 176.6(8)   |
| C(36)-C(37)-C(38)-C(39)  | -1.1(17)   |
| C(37)-C(38)-C(39)-C(40)  | 0.3(18)    |
| C(38)-C(39)-C(40)-C(41)  | 0.2(18)    |
| C(37)-C(36)-C(41)-C(40)  | -0.8(17)   |
| P(2)-C(36)-C(41)-C(40)   | -176.1(9)  |
| C(39)-C(40)-C(41)-C(36)  | 0.0(19)    |
| O(2)-P(2)-C(42)-C(43)    | -175.2(7)  |
| N(2)-P(2)-C(42)-C(43)    | 61.0(8)    |
| C(36)-P(2)-C(42)-C(43)   | -49.7(9)   |
| O(2)-P(2)-C(42)-C(47)    | 9.3(8)     |

|                         |            |
|-------------------------|------------|
| N(2)-P(2)-C(42)-C(47)   | -114.5(7)  |
| C(36)-P(2)-C(42)-C(47)  | 134.8(7)   |
| C(47)-C(42)-C(43)-C(44) | -0.4(14)   |
| P(2)-C(42)-C(43)-C(44)  | -176.0(8)  |
| C(42)-C(43)-C(44)-C(45) | -0.7(16)   |
| C(43)-C(44)-C(45)-C(46) | 0.9(16)    |
| C(44)-C(45)-C(46)-C(47) | -0.1(16)   |
| C(45)-C(46)-C(47)-C(42) | -1.0(15)   |
| C(43)-C(42)-C(47)-C(46) | 1.2(13)    |
| P(2)-C(42)-C(47)-C(46)  | 176.8(7)   |
| O(3)-P(3)-N(3)-C(57)    | -39.6(8)   |
| C(67)-P(3)-N(3)-C(57)   | 84.2(7)    |
| C(61)-P(3)-N(3)-C(57)   | -162.8(7)  |
| C(56)-C(51)-C(52)-C(53) | -0.7(14)   |
| Br(3)-C(51)-C(52)-C(53) | 179.6(7)   |
| C(51)-C(52)-C(53)-C(54) | 1.2(15)    |
| C(52)-C(53)-C(54)-C(55) | 0.4(15)    |
| C(53)-C(54)-C(55)-C(56) | -2.3(14)   |
| C(53)-C(54)-C(55)-C(57) | 173.3(9)   |
| C(54)-C(55)-C(56)-C(51) | 2.8(12)    |
| C(57)-C(55)-C(56)-C(51) | -172.9(7)  |
| C(52)-C(51)-C(56)-C(55) | -1.2(13)   |
| Br(3)-C(51)-C(56)-C(55) | 178.5(6)   |
| P(3)-N(3)-C(57)-C(55)   | -74.3(9)   |
| P(3)-N(3)-C(57)-C(58)   | 158.2(7)   |
| C(56)-C(55)-C(57)-N(3)  | 100.5(10)  |
| C(54)-C(55)-C(57)-N(3)  | -75.1(10)  |
| C(56)-C(55)-C(57)-C(58) | -132.9(9)  |
| C(54)-C(55)-C(57)-C(58) | 51.5(11)   |
| N(3)-C(57)-C(58)-C(59)  | 4.0(14)    |
| C(55)-C(57)-C(58)-C(59) | -122.2(11) |
| N(3)-C(57)-C(58)-Si(3)  | -177.1(6)  |
| C(55)-C(57)-C(58)-Si(3) | 56.7(11)   |
| C(75)-Si(3)-C(58)-C(59) | -45.3(10)  |
| C(73)-Si(3)-C(58)-C(59) | -165.7(9)  |
| C(74)-Si(3)-C(58)-C(59) | 73.9(10)   |

|                         |           |
|-------------------------|-----------|
| C(75)-Si(3)-C(58)-C(57) | 135.7(9)  |
| C(73)-Si(3)-C(58)-C(57) | 15.3(10)  |
| C(74)-Si(3)-C(58)-C(57) | -105.1(9) |
| O(3)-P(3)-C(61)-C(66)   | 66.3(9)   |
| N(3)-P(3)-C(61)-C(66)   | -171.4(8) |
| C(67)-P(3)-C(61)-C(66)  | -55.1(9)  |
| O(3)-P(3)-C(61)-C(62)   | -109.8(9) |
| N(3)-P(3)-C(61)-C(62)   | 12.6(9)   |
| C(67)-P(3)-C(61)-C(62)  | 128.8(8)  |
| C(66)-C(61)-C(62)-C(63) | -1.5(16)  |
| P(3)-C(61)-C(62)-C(63)  | 174.5(8)  |
| C(61)-C(62)-C(63)-C(64) | 1.2(16)   |
| C(62)-C(63)-C(64)-C(65) | -1.2(17)  |
| C(63)-C(64)-C(65)-C(66) | 1.5(17)   |
| C(62)-C(61)-C(66)-C(65) | 1.9(16)   |
| P(3)-C(61)-C(66)-C(65)  | -174.3(9) |
| C(64)-C(65)-C(66)-C(61) | -1.9(17)  |
| O(3)-P(3)-C(67)-C(72)   | 1.0(8)    |
| N(3)-P(3)-C(67)-C(72)   | -123.8(7) |
| C(61)-P(3)-C(67)-C(72)  | 124.3(7)  |
| O(3)-P(3)-C(67)-C(68)   | 178.8(7)  |
| N(3)-P(3)-C(67)-C(68)   | 54.0(8)   |
| C(61)-P(3)-C(67)-C(68)  | -57.9(9)  |
| C(72)-C(67)-C(68)-C(69) | 0.0(14)   |
| P(3)-C(67)-C(68)-C(69)  | -177.8(7) |
| C(67)-C(68)-C(69)-C(70) | 0.0(15)   |
| C(68)-C(69)-C(70)-C(71) | 0.2(16)   |
| C(69)-C(70)-C(71)-C(72) | -0.5(16)  |
| C(70)-C(71)-C(72)-C(67) | 0.5(15)   |
| C(68)-C(67)-C(72)-C(71) | -0.3(13)  |
| P(3)-C(67)-C(72)-C(71)  | 177.6(7)  |
| O(4)-P(4)-N(4)-C(82)    | -39.5(8)  |
| C(92)-P(4)-N(4)-C(82)   | 83.6(7)   |
| C(86)-P(4)-N(4)-C(82)   | -163.5(7) |
| C(81)-C(76)-C(77)-C(78) | -1.0(15)  |
| Br(4)-C(76)-C(77)-C(78) | -177.9(8) |

|                          |            |
|--------------------------|------------|
| C(76)-C(77)-C(78)-C(79)  | 2.5(17)    |
| C(77)-C(78)-C(79)-C(80)  | -1.9(17)   |
| C(78)-C(79)-C(80)-C(81)  | -0.1(15)   |
| C(78)-C(79)-C(80)-C(82)  | 175.2(9)   |
| C(79)-C(80)-C(81)-C(76)  | 1.6(12)    |
| C(82)-C(80)-C(81)-C(76)  | -173.8(7)  |
| C(77)-C(76)-C(81)-C(80)  | -1.0(13)   |
| Br(4)-C(76)-C(81)-C(80)  | 175.9(6)   |
| P(4)-N(4)-C(82)-C(83)    | 159.2(6)   |
| P(4)-N(4)-C(82)-C(80)    | -73.1(9)   |
| C(81)-C(80)-C(82)-N(4)   | 105.7(9)   |
| C(79)-C(80)-C(82)-N(4)   | -69.6(10)  |
| C(81)-C(80)-C(82)-C(83)  | -127.3(9)  |
| C(79)-C(80)-C(82)-C(83)  | 57.4(11)   |
| N(4)-C(82)-C(83)-C(84)   | -3.6(13)   |
| C(80)-C(82)-C(83)-C(84)  | -129.7(10) |
| N(4)-C(82)-C(83)-Si(4)   | 179.2(6)   |
| C(80)-C(82)-C(83)-Si(4)  | 53.1(11)   |
| C(100)-Si(4)-C(83)-C(84) | -22.1(10)  |
| C(98)-Si(4)-C(83)-C(84)  | -143.8(9)  |
| C(99)-Si(4)-C(83)-C(84)  | 98.4(9)    |
| C(100)-Si(4)-C(83)-C(82) | 155.2(8)   |
| C(98)-Si(4)-C(83)-C(82)  | 33.5(9)    |
| C(99)-Si(4)-C(83)-C(82)  | -84.4(9)   |
| O(4)-P(4)-C(86)-C(91)    | 72.9(9)    |
| N(4)-P(4)-C(86)-C(91)    | -164.5(8)  |
| C(92)-P(4)-C(86)-C(91)   | -48.9(9)   |
| O(4)-P(4)-C(86)-C(87)    | -104.8(9)  |
| N(4)-P(4)-C(86)-C(87)    | 17.8(10)   |
| C(92)-P(4)-C(86)-C(87)   | 133.4(9)   |
| C(91)-C(86)-C(87)-C(88)  | -0.1(16)   |
| P(4)-C(86)-C(87)-C(88)   | 177.7(9)   |
| C(86)-C(87)-C(88)-C(89)  | -0.5(18)   |
| C(87)-C(88)-C(89)-C(90)  | 0.7(18)    |
| C(88)-C(89)-C(90)-C(91)  | -0.3(17)   |
| C(87)-C(86)-C(91)-C(90)  | 0.4(16)    |

|                         |           |
|-------------------------|-----------|
| P(4)-C(86)-C(91)-C(90)  | -177.4(9) |
| C(89)-C(90)-C(91)-C(86) | -0.3(18)  |
| O(4)-P(4)-C(92)-C(93)   | -176.6(8) |
| N(4)-P(4)-C(92)-C(93)   | 58.9(9)   |
| C(86)-P(4)-C(92)-C(93)  | -51.9(9)  |
| O(4)-P(4)-C(92)-C(97)   | 8.0(8)    |
| N(4)-P(4)-C(92)-C(97)   | -116.6(7) |
| C(86)-P(4)-C(92)-C(97)  | 132.6(7)  |
| C(97)-C(92)-C(93)-C(94) | -2.7(15)  |
| P(4)-C(92)-C(93)-C(94)  | -178.2(8) |
| C(92)-C(93)-C(94)-C(95) | 0.8(17)   |
| C(93)-C(94)-C(95)-C(96) | 1.0(17)   |
| C(94)-C(95)-C(96)-C(97) | -0.8(16)  |
| C(95)-C(96)-C(97)-C(92) | -1.2(15)  |
| C(93)-C(92)-C(97)-C(96) | 2.9(14)   |
| P(4)-C(92)-C(97)-C(96)  | 178.5(7)  |

---

Symmetry transformations used to generate equivalent atoms:

**Table S25.** Hydrogen bonds for C<sub>25</sub>H<sub>27</sub>BrNOPSi [Å and °]

| D-H...A             | d(D-H) | d(H...A) | d(D...A)  | <(DHA) |
|---------------------|--------|----------|-----------|--------|
| N(1)-H(1N)...O(1)#1 | 0.88   | 2.39     | 3.009(11) | 127.4  |
| N(2)-H(2N)...O(2)#2 | 0.88   | 2.40     | 3.050(10) | 130.5  |
| N(3)-H(3N)...O(4)#3 | 0.88   | 2.36     | 2.997(11) | 129.4  |
| N(4)-H(4N)...O(3)   | 0.88   | 2.34     | 2.980(10) | 129.6  |

Symmetry transformations used to generate equivalent atoms:

#1 -x,y-1/2,-z+1 #2 -x+2,y-1/2,-z+2 #3 x,y-1,z



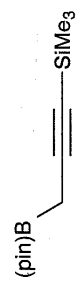

**3a**

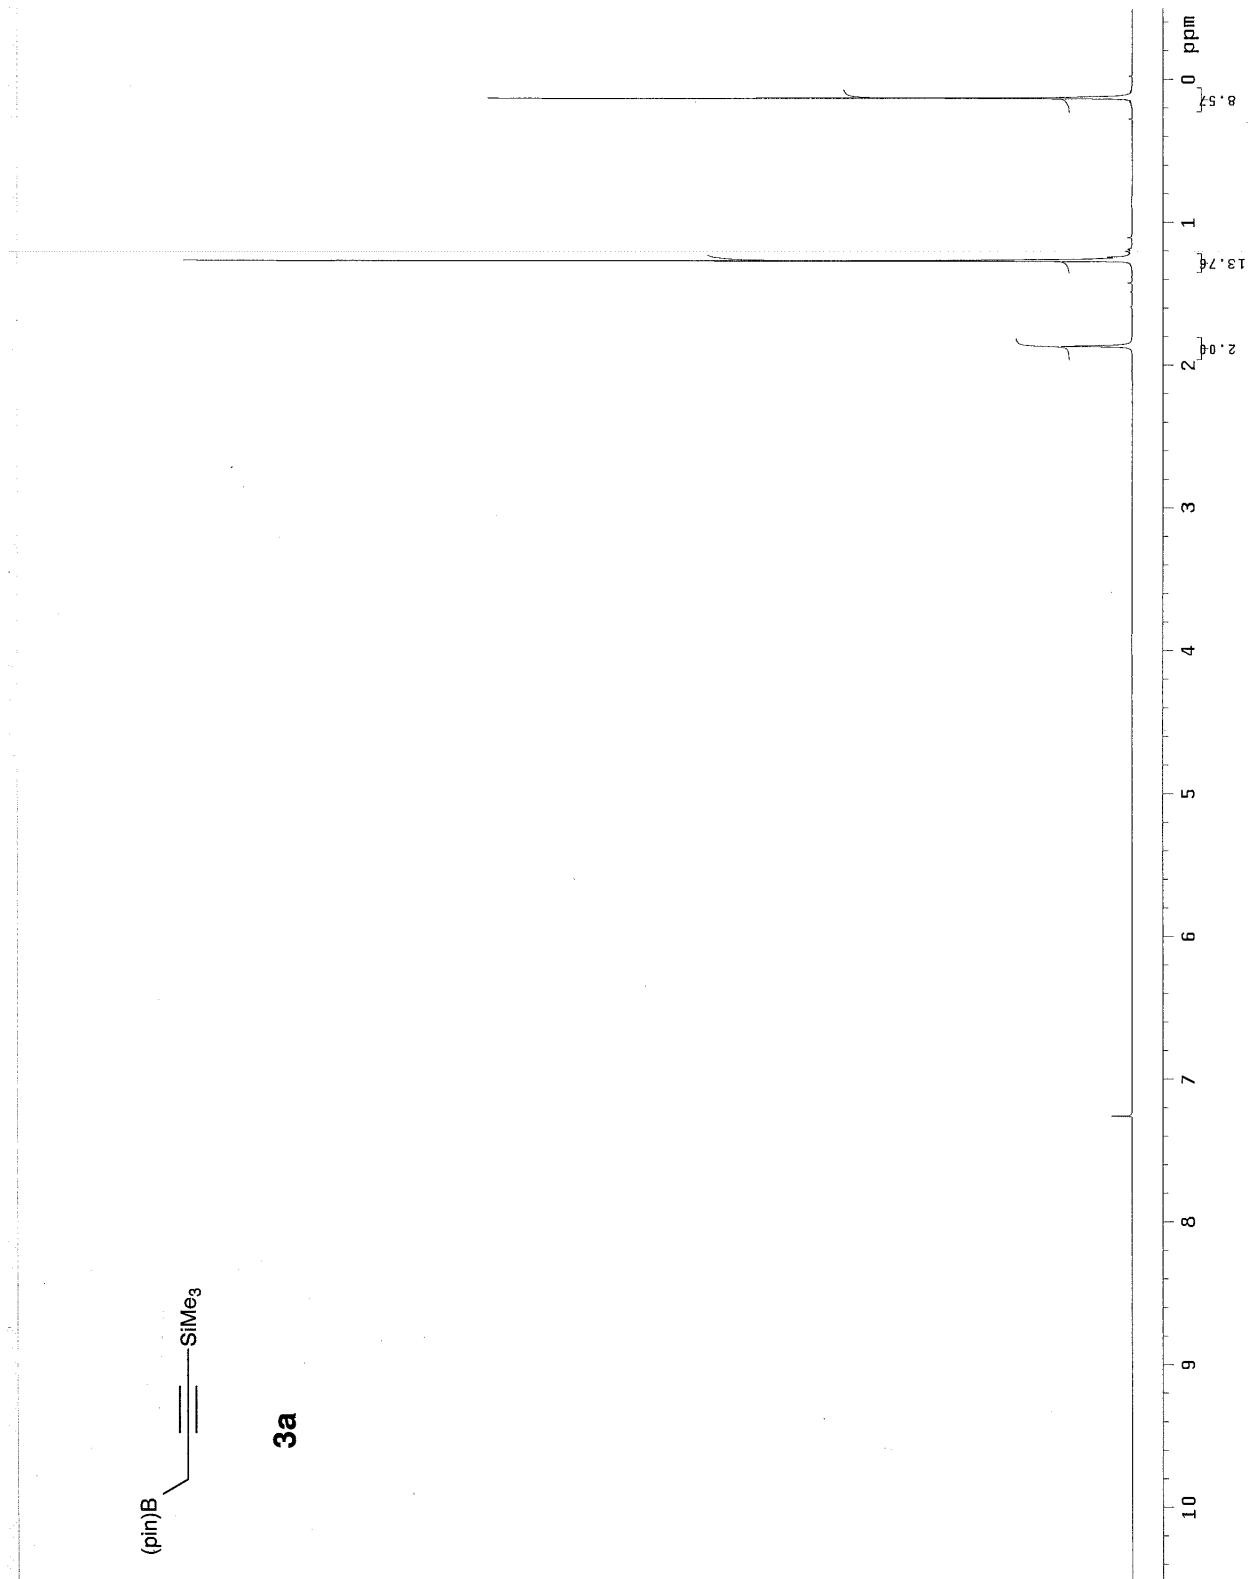

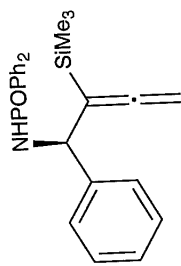

**4a**

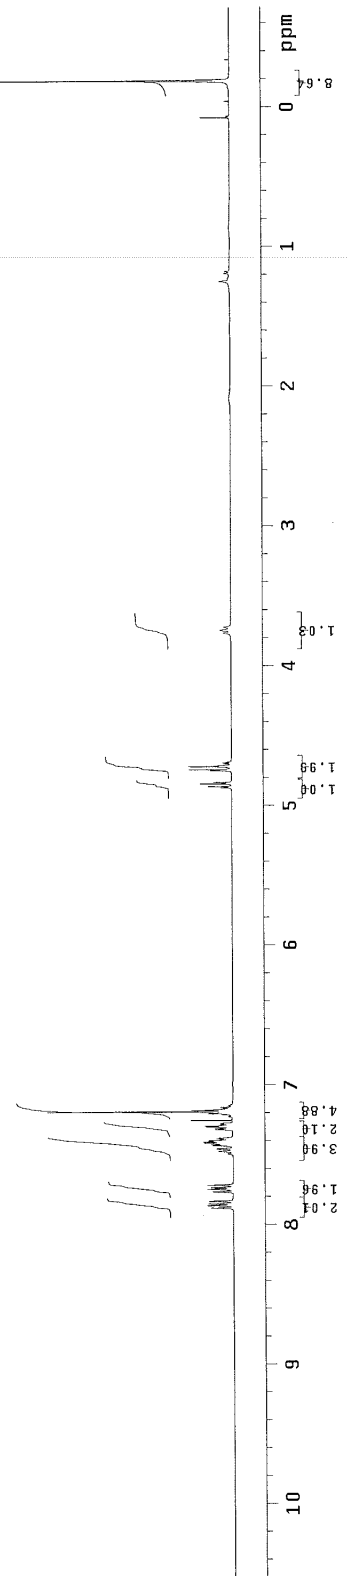

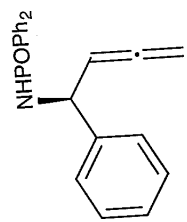

**4b**

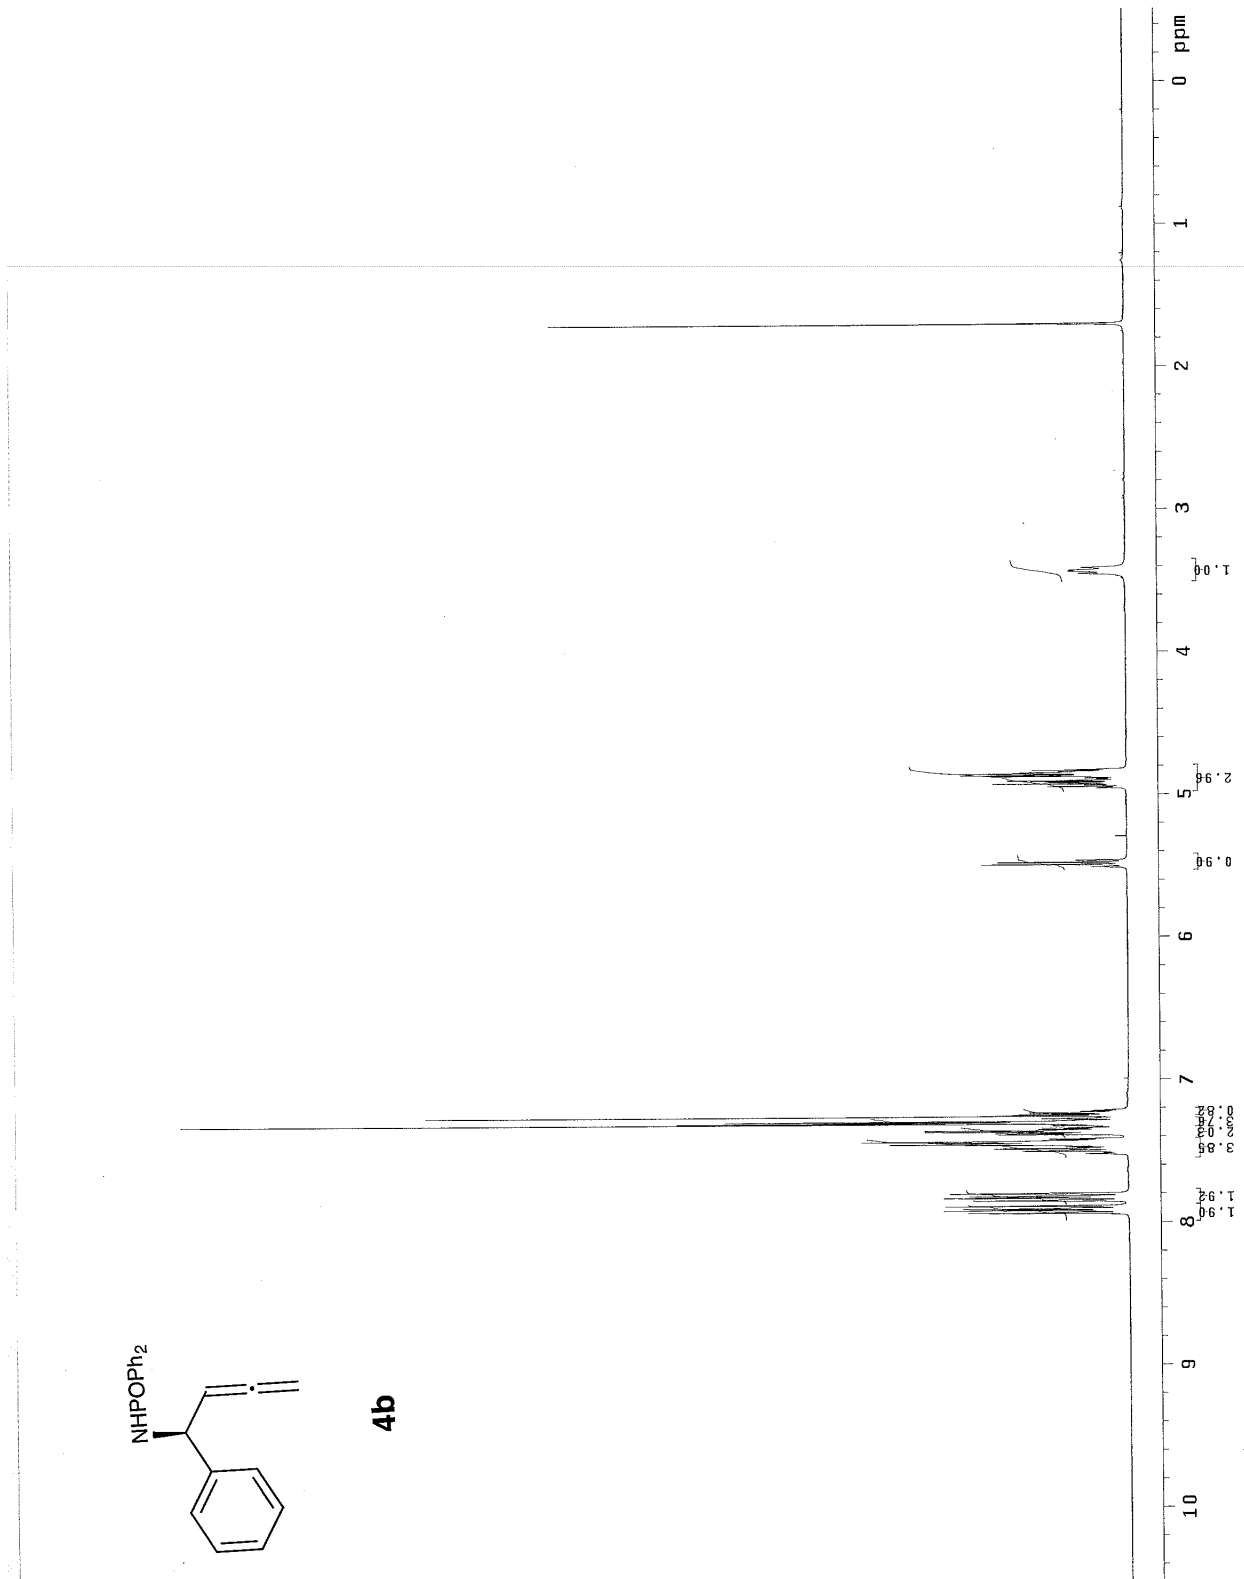

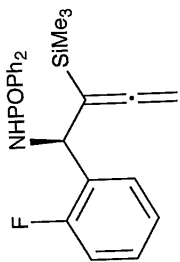

4C

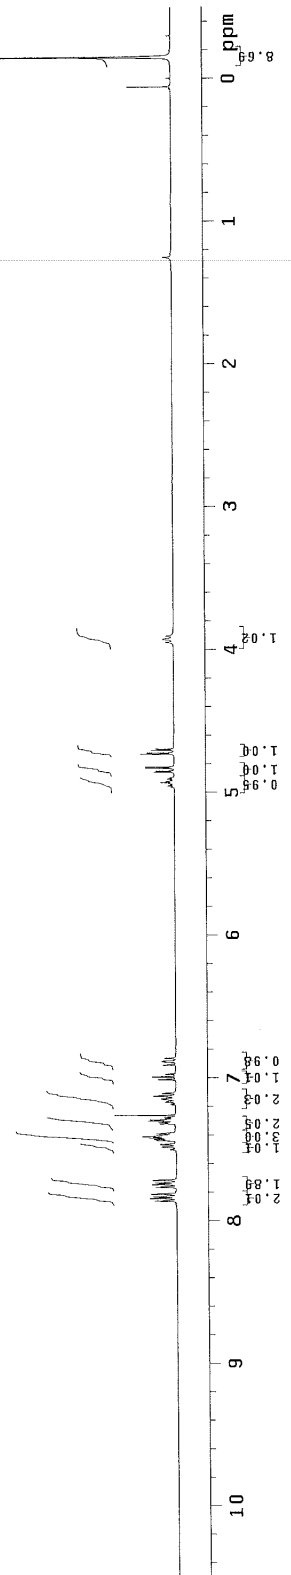

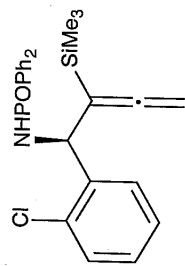

**4d**

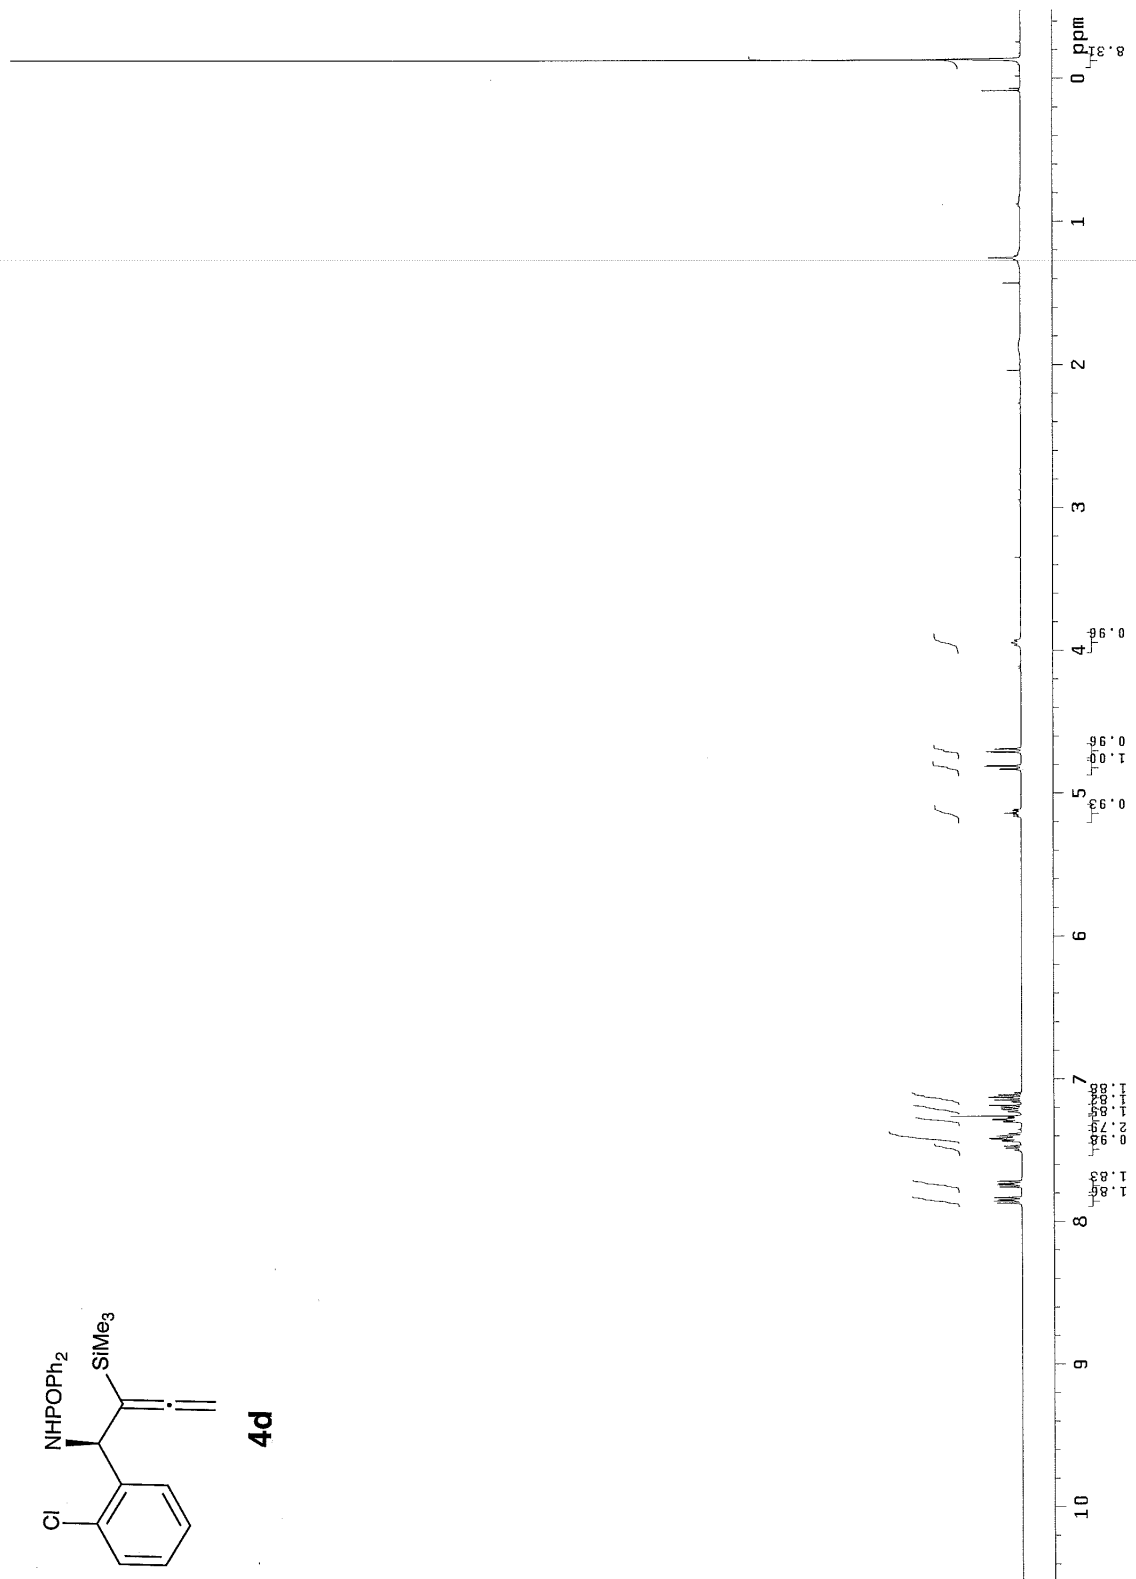

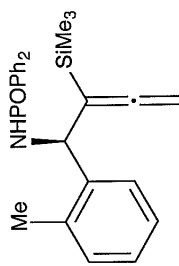

**4e**

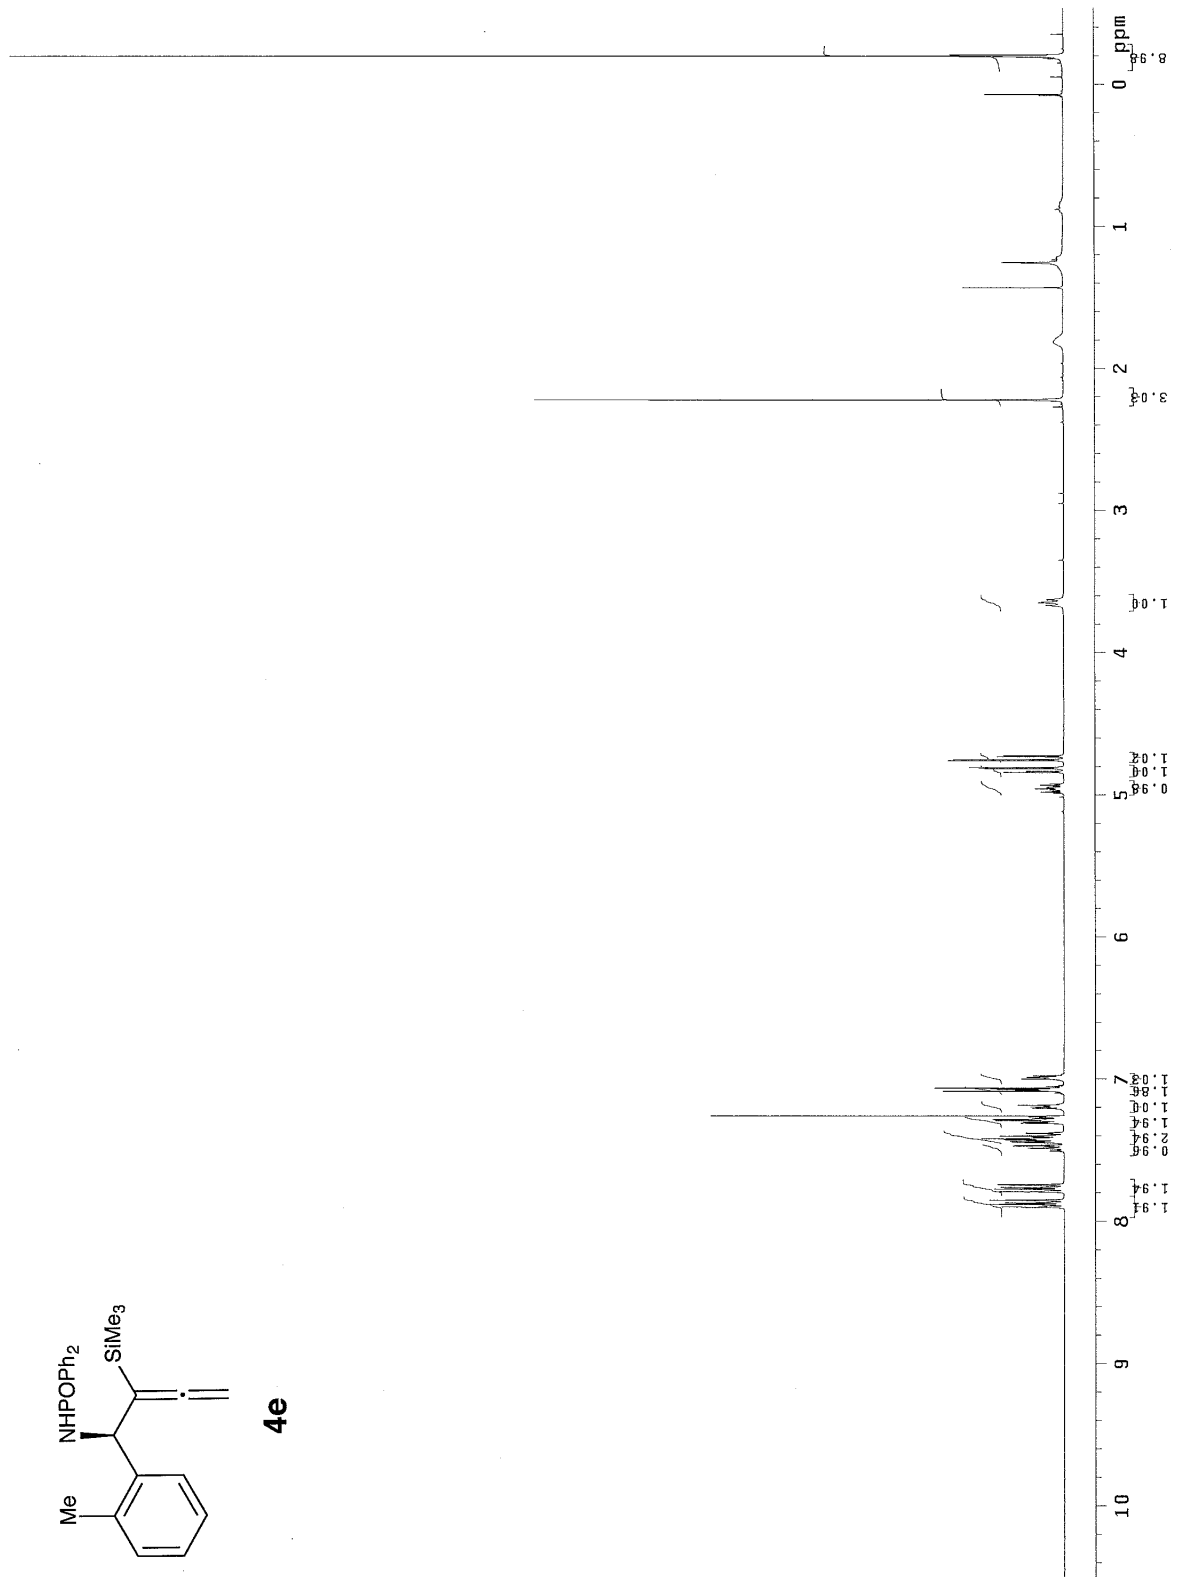

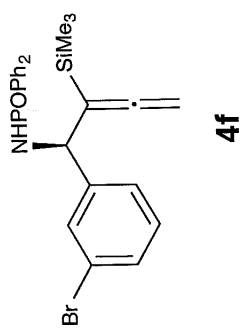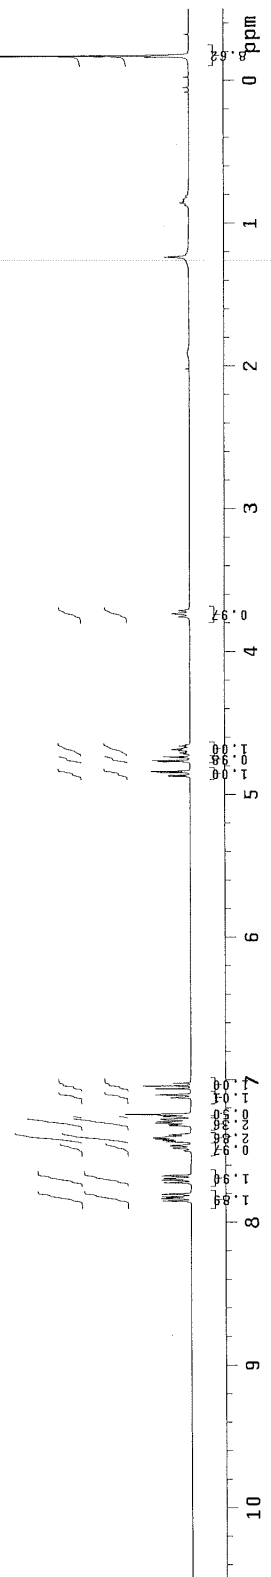

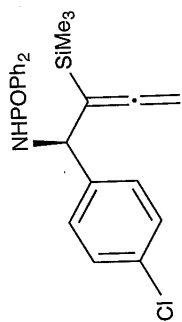

**4g**

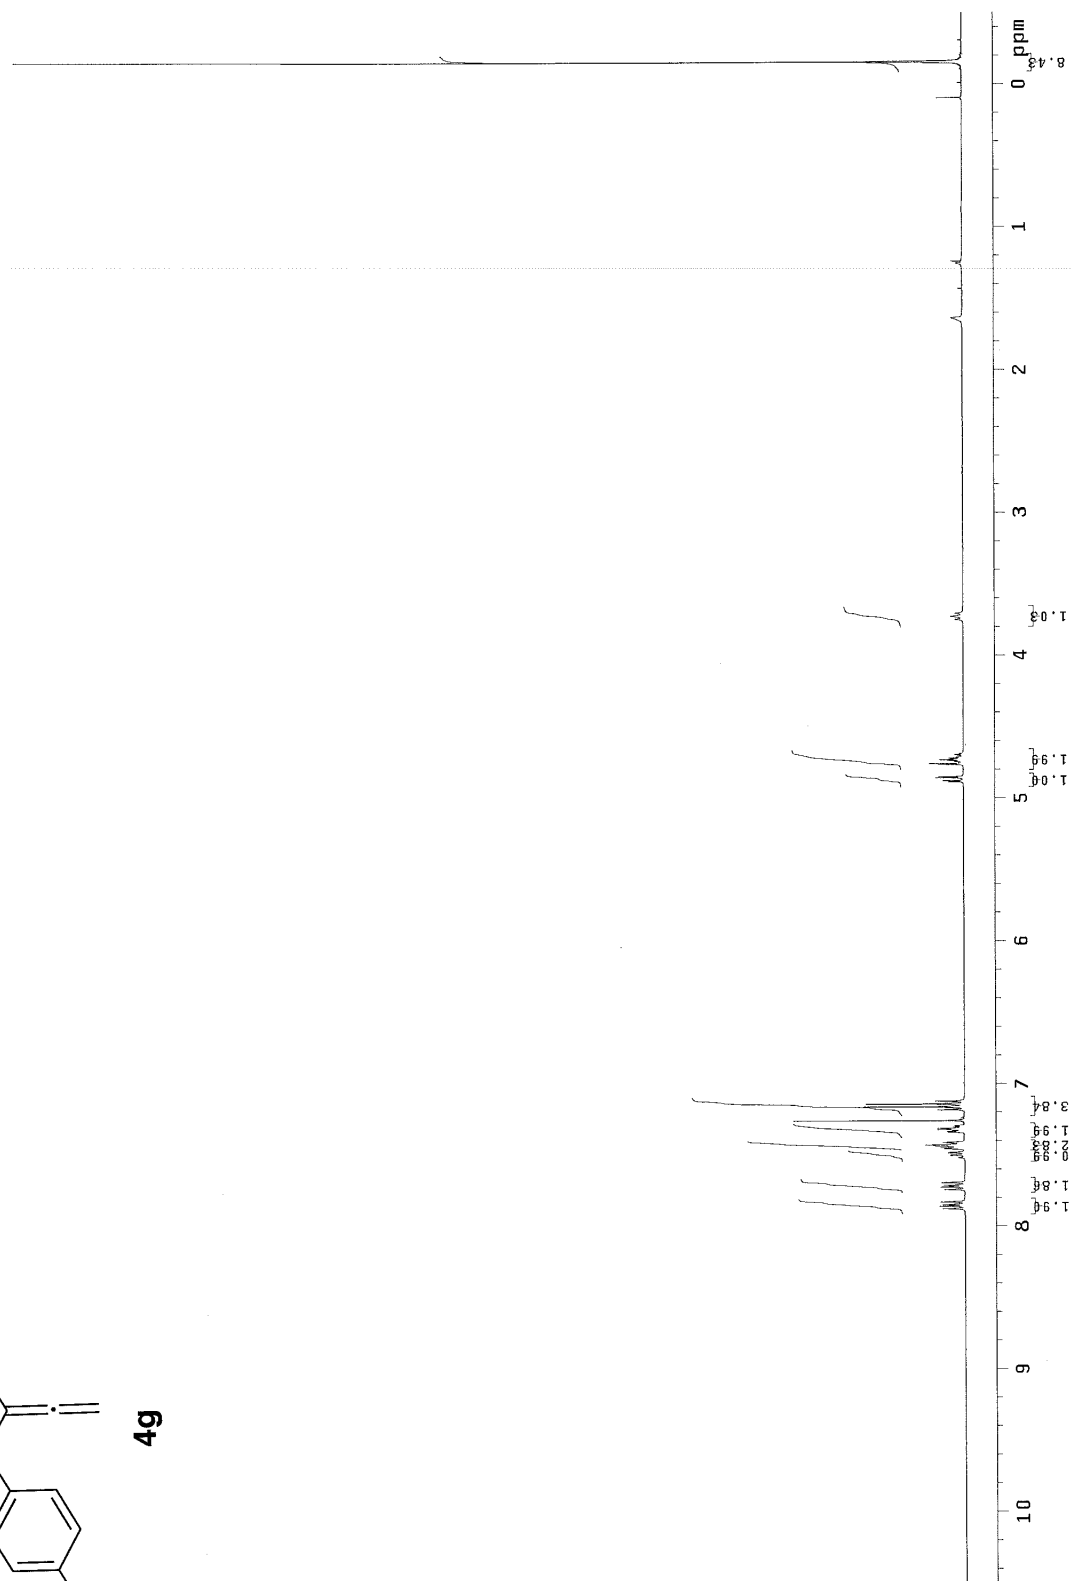



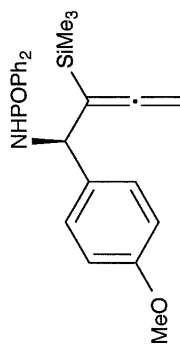

**4h**

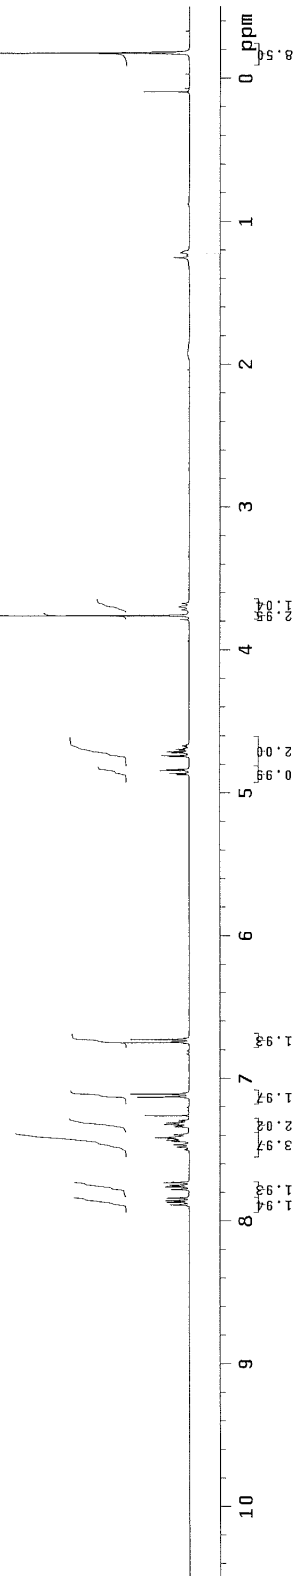

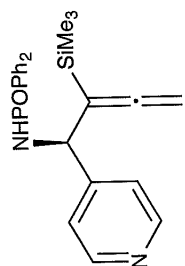

4i

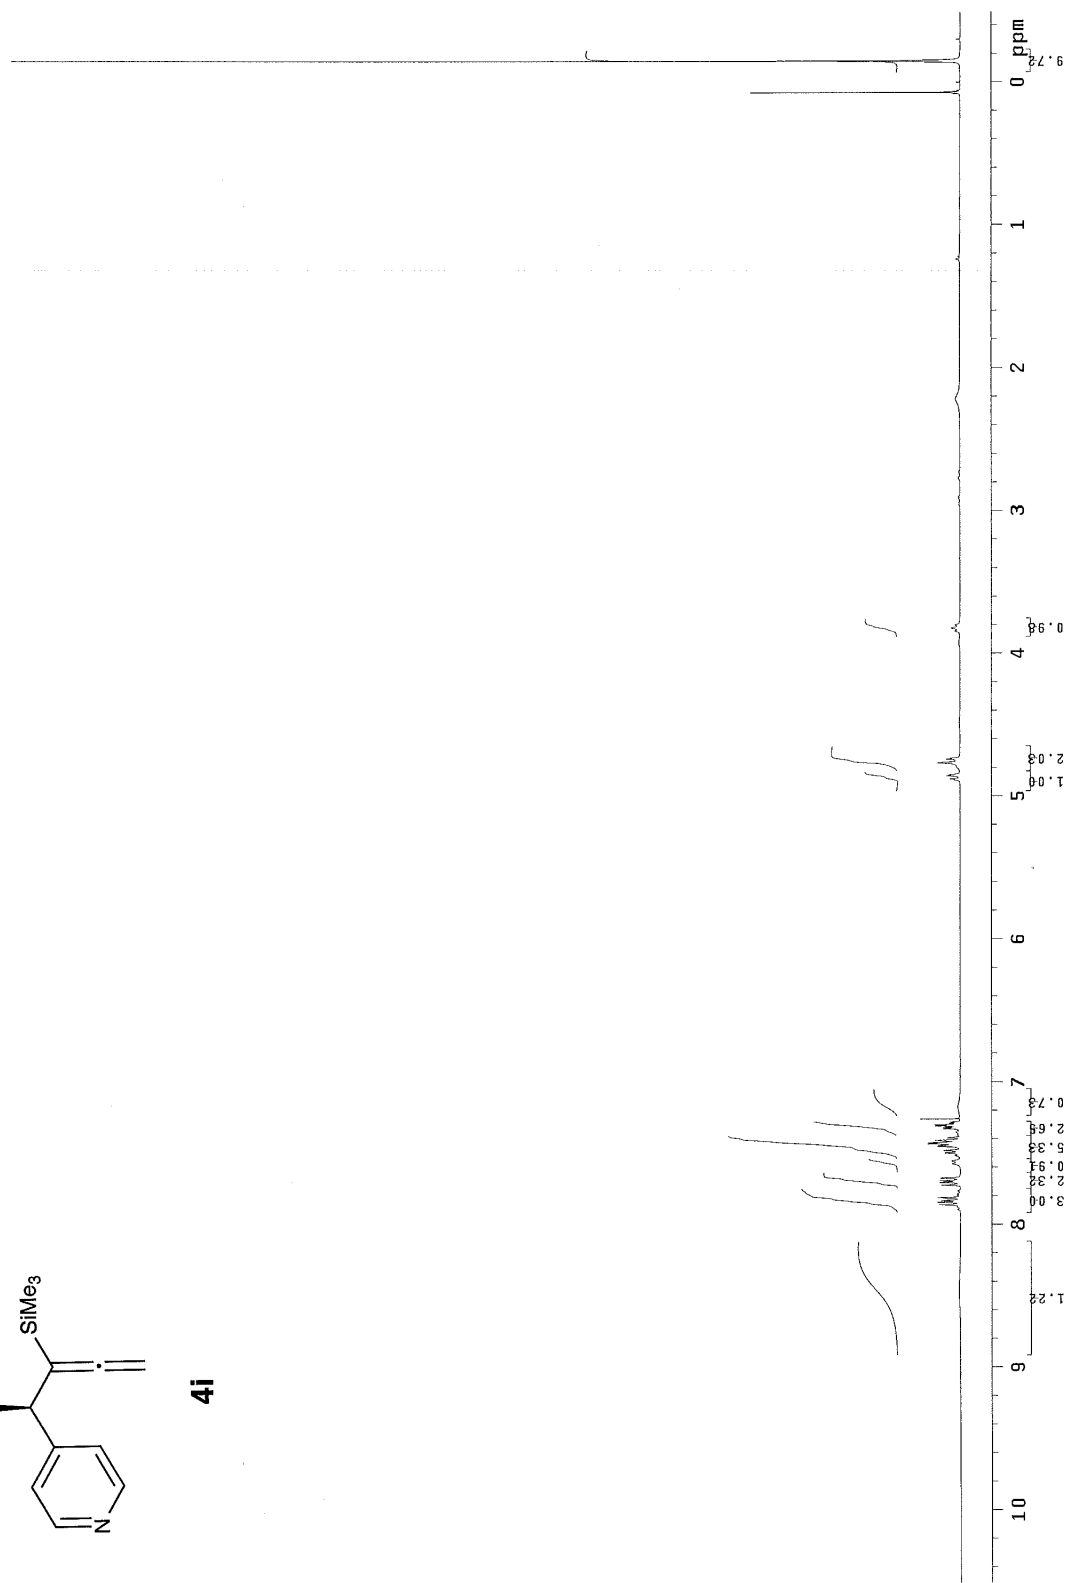

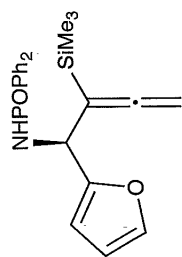

4j

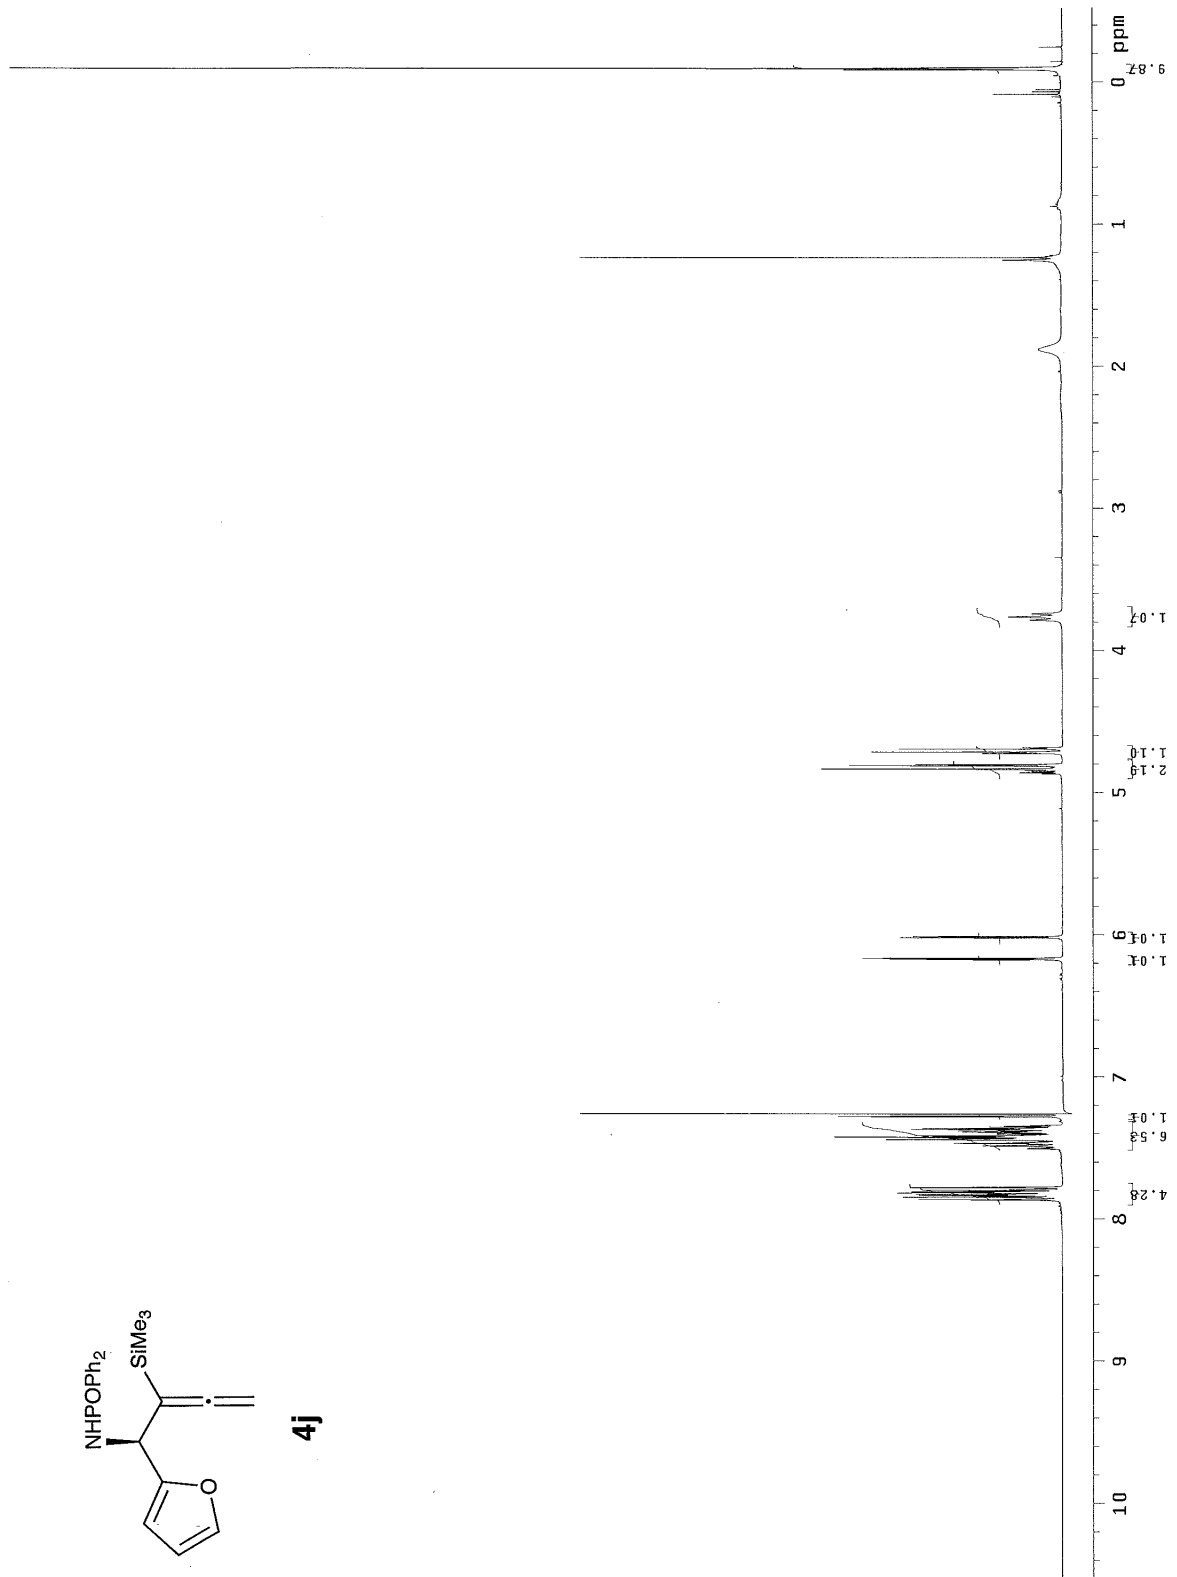

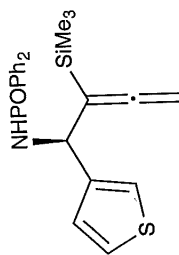

4k

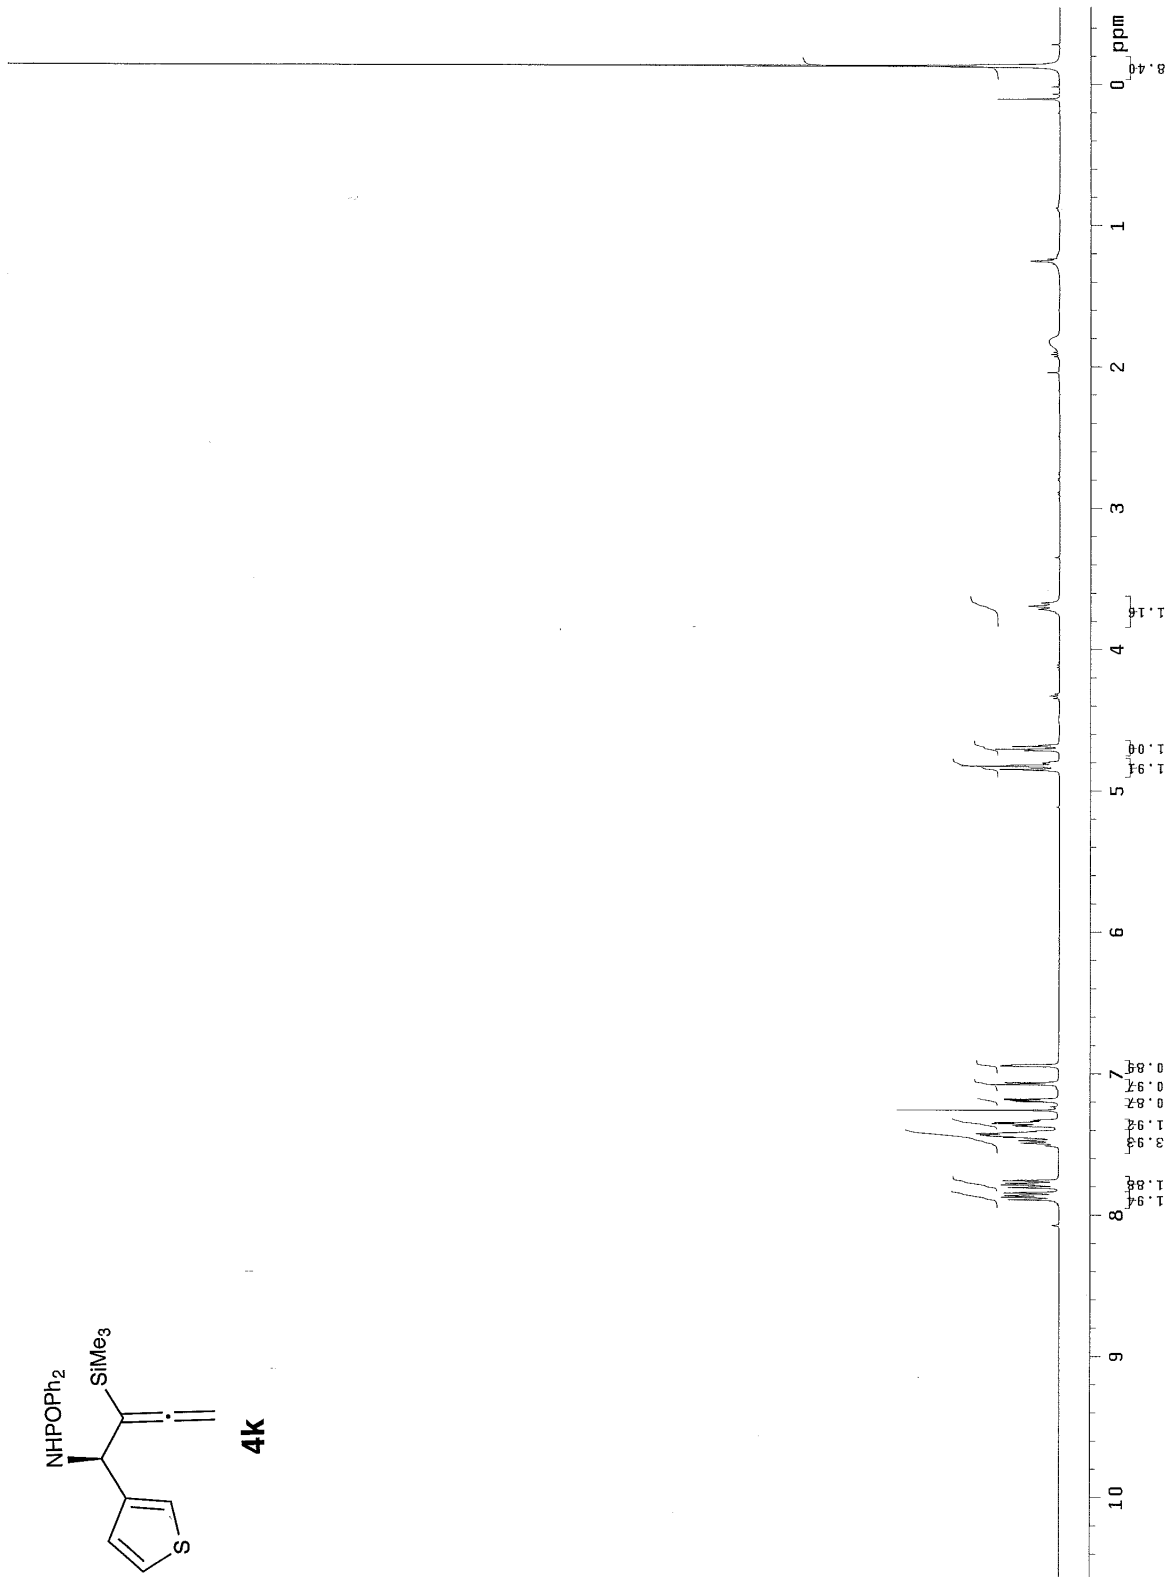

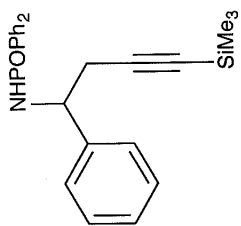

**5a**

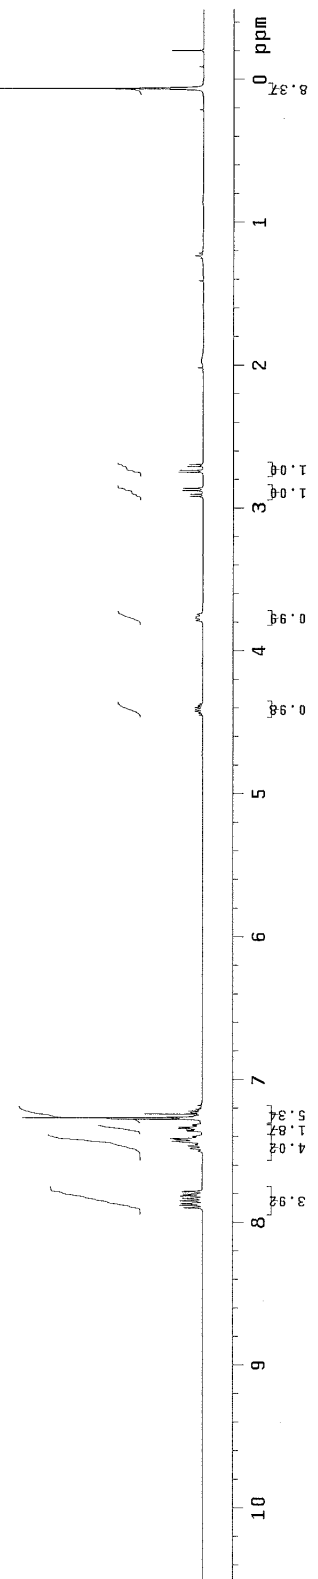

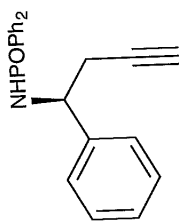

**5b**

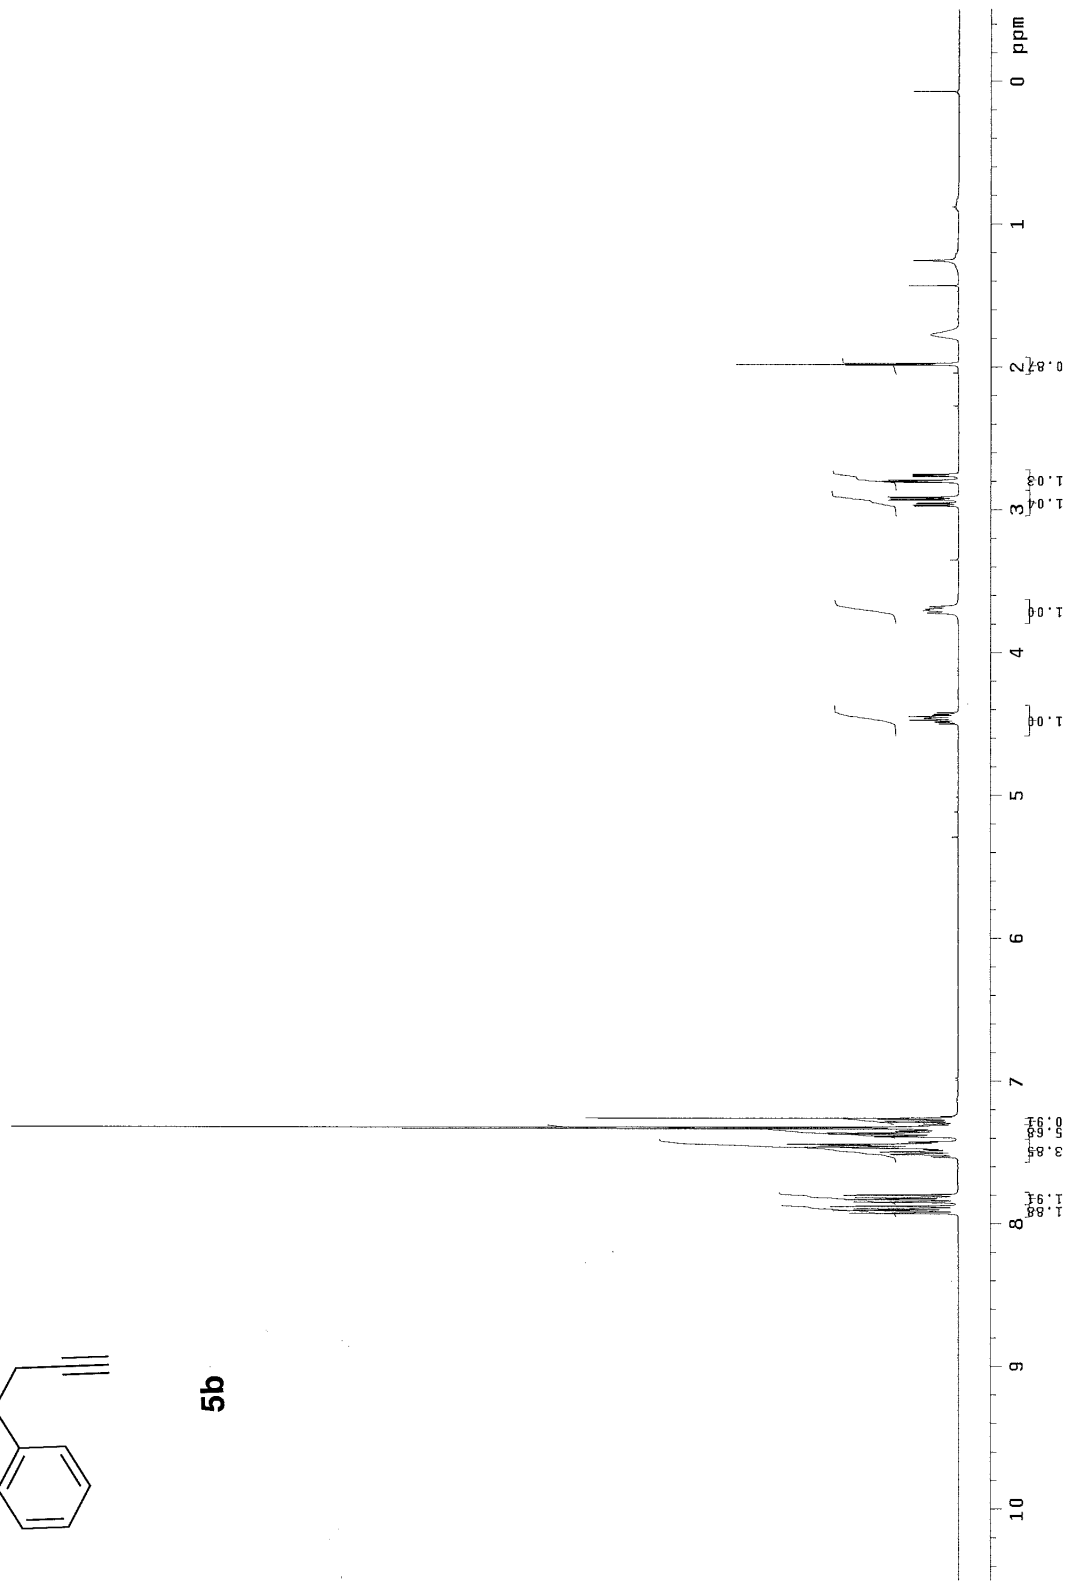

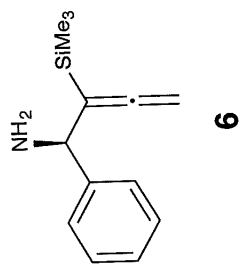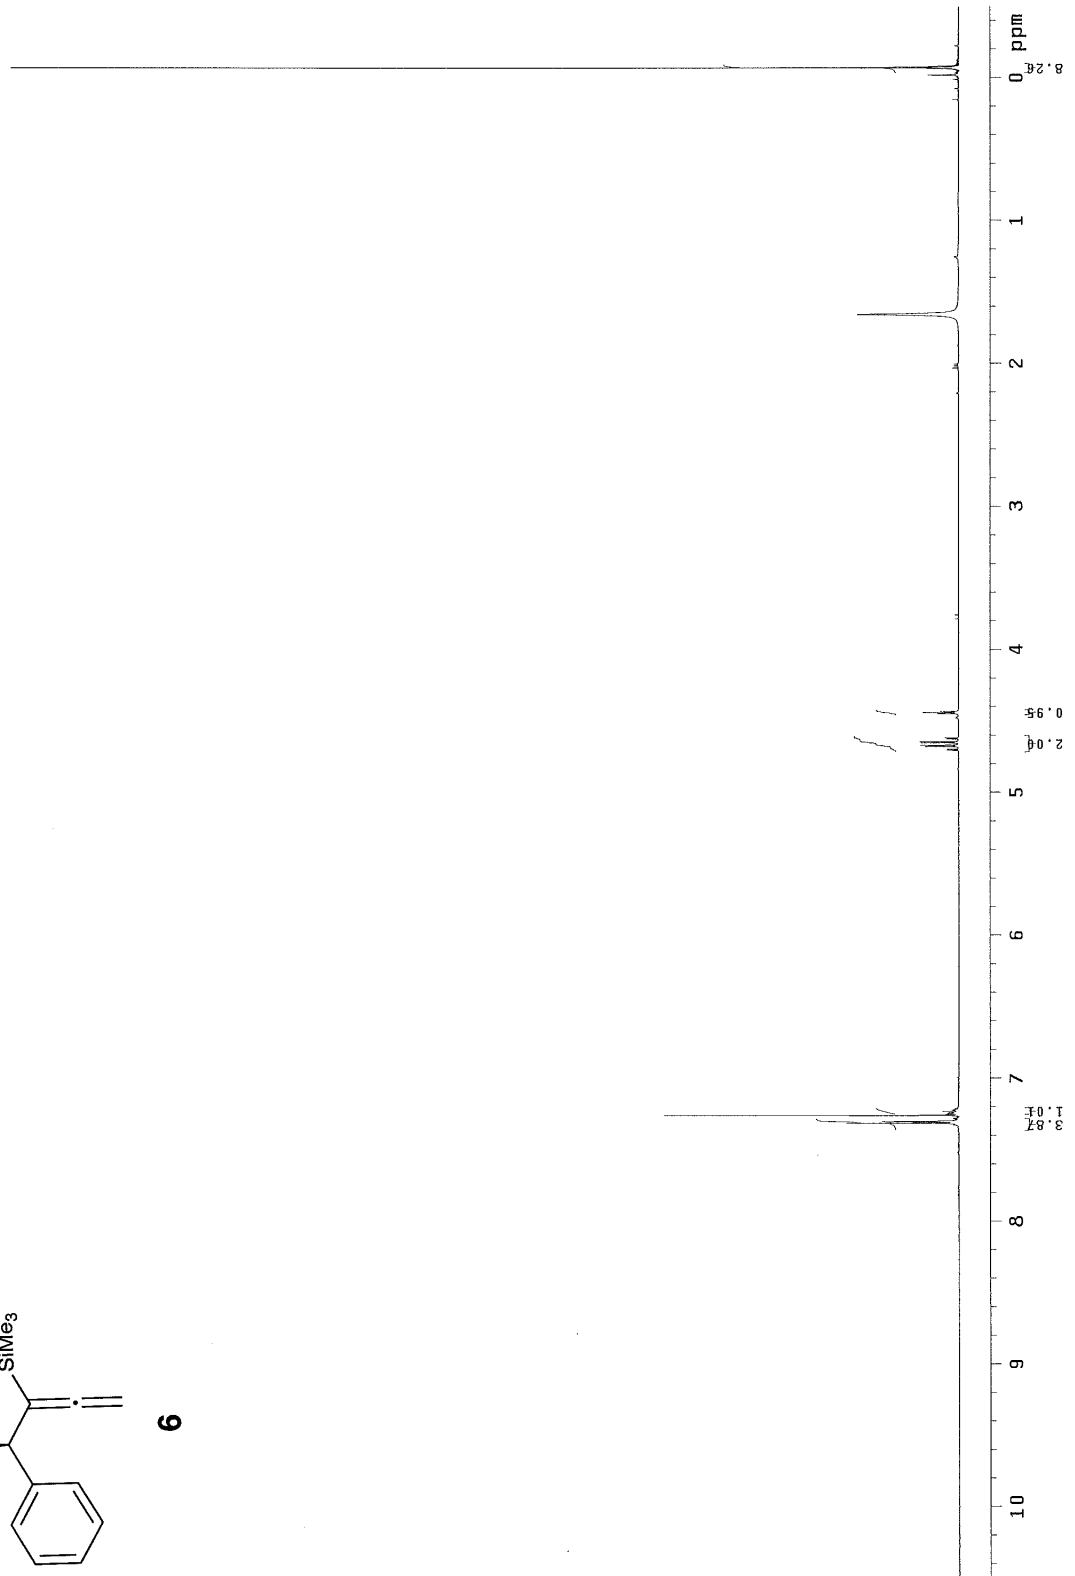

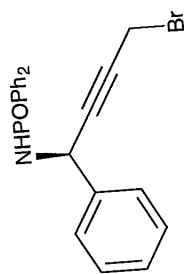

7

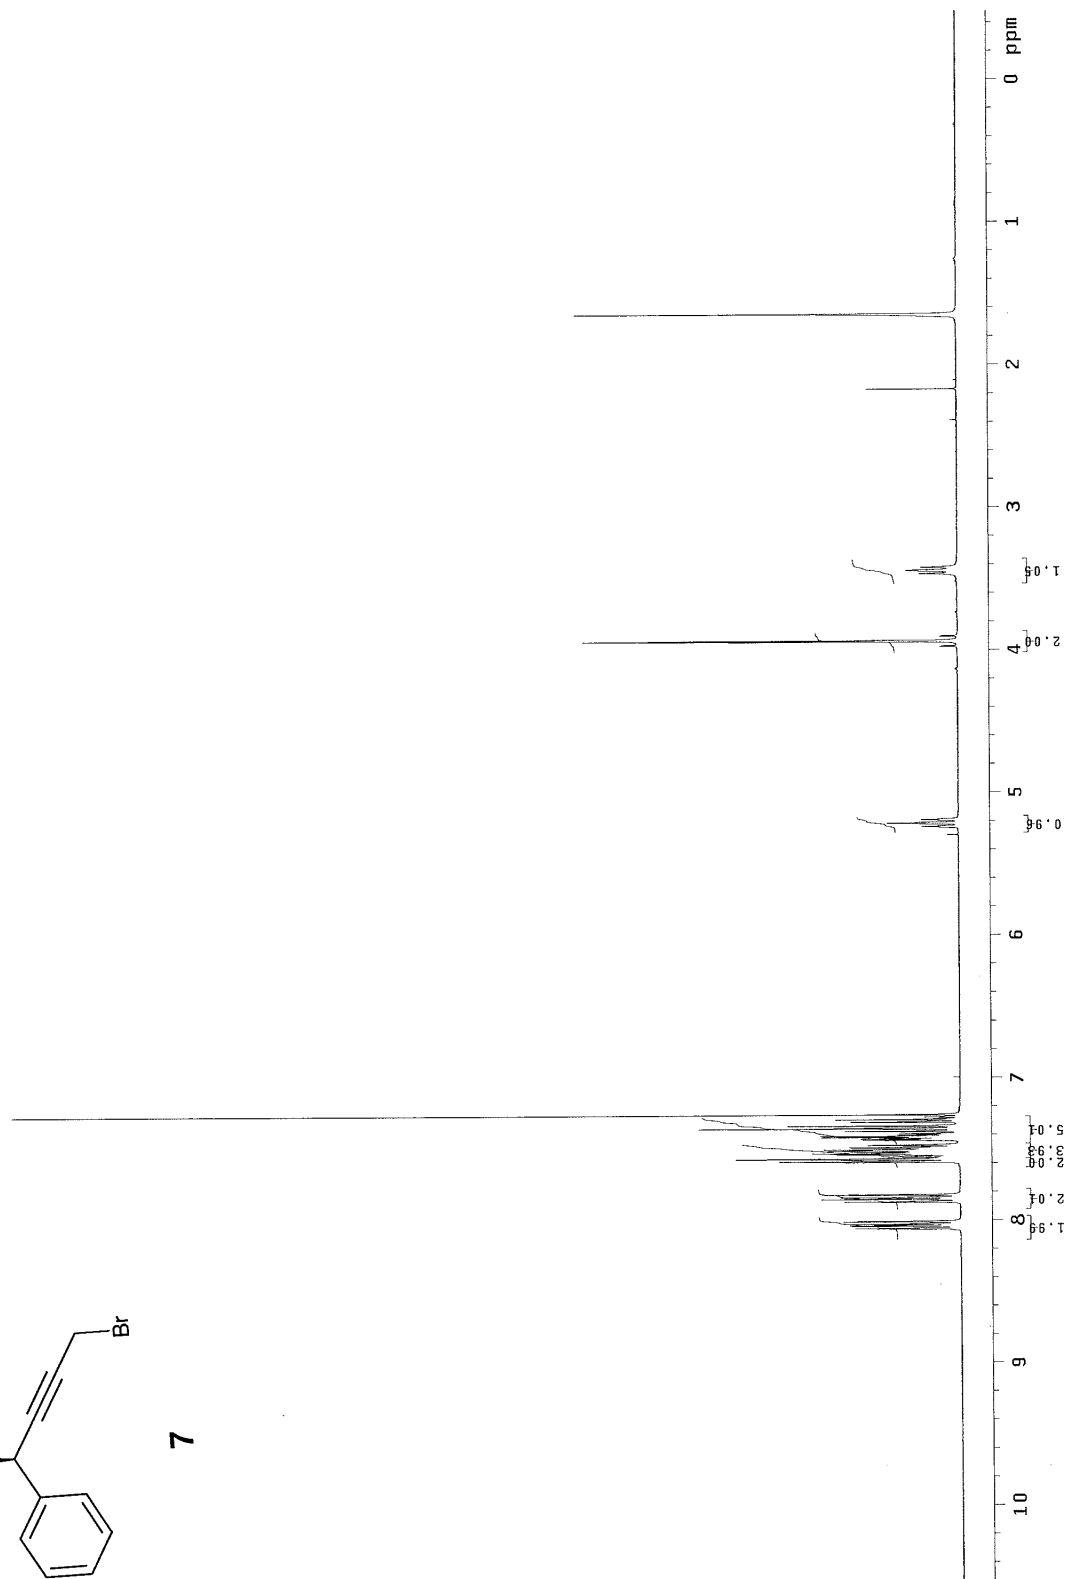



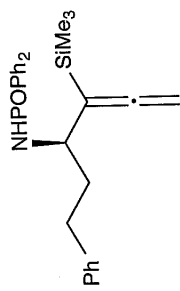

8a

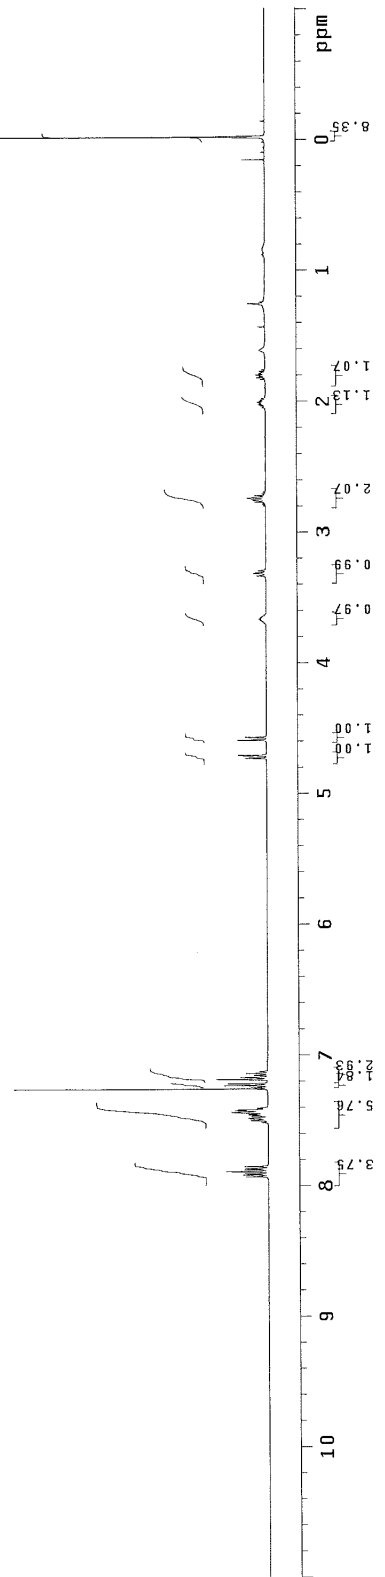

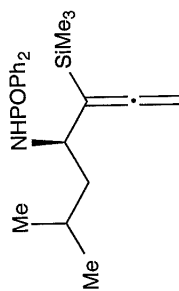

8b

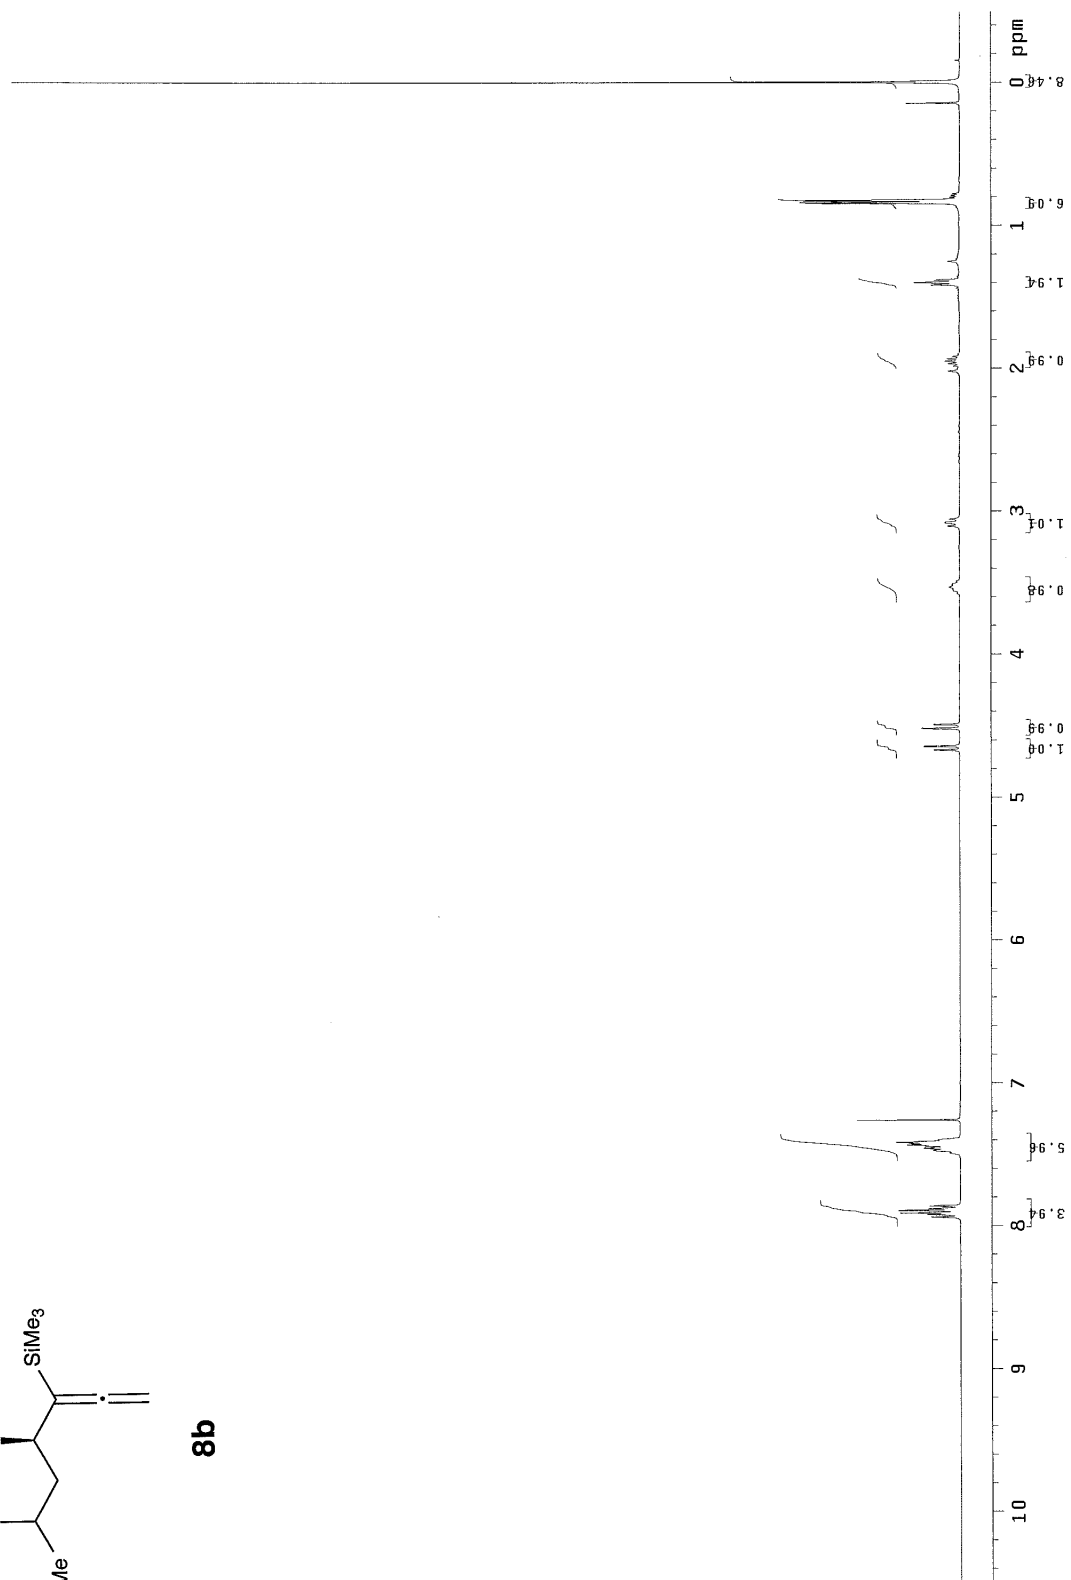

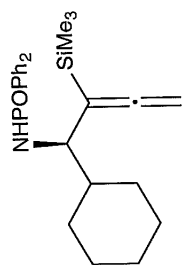

**8c**

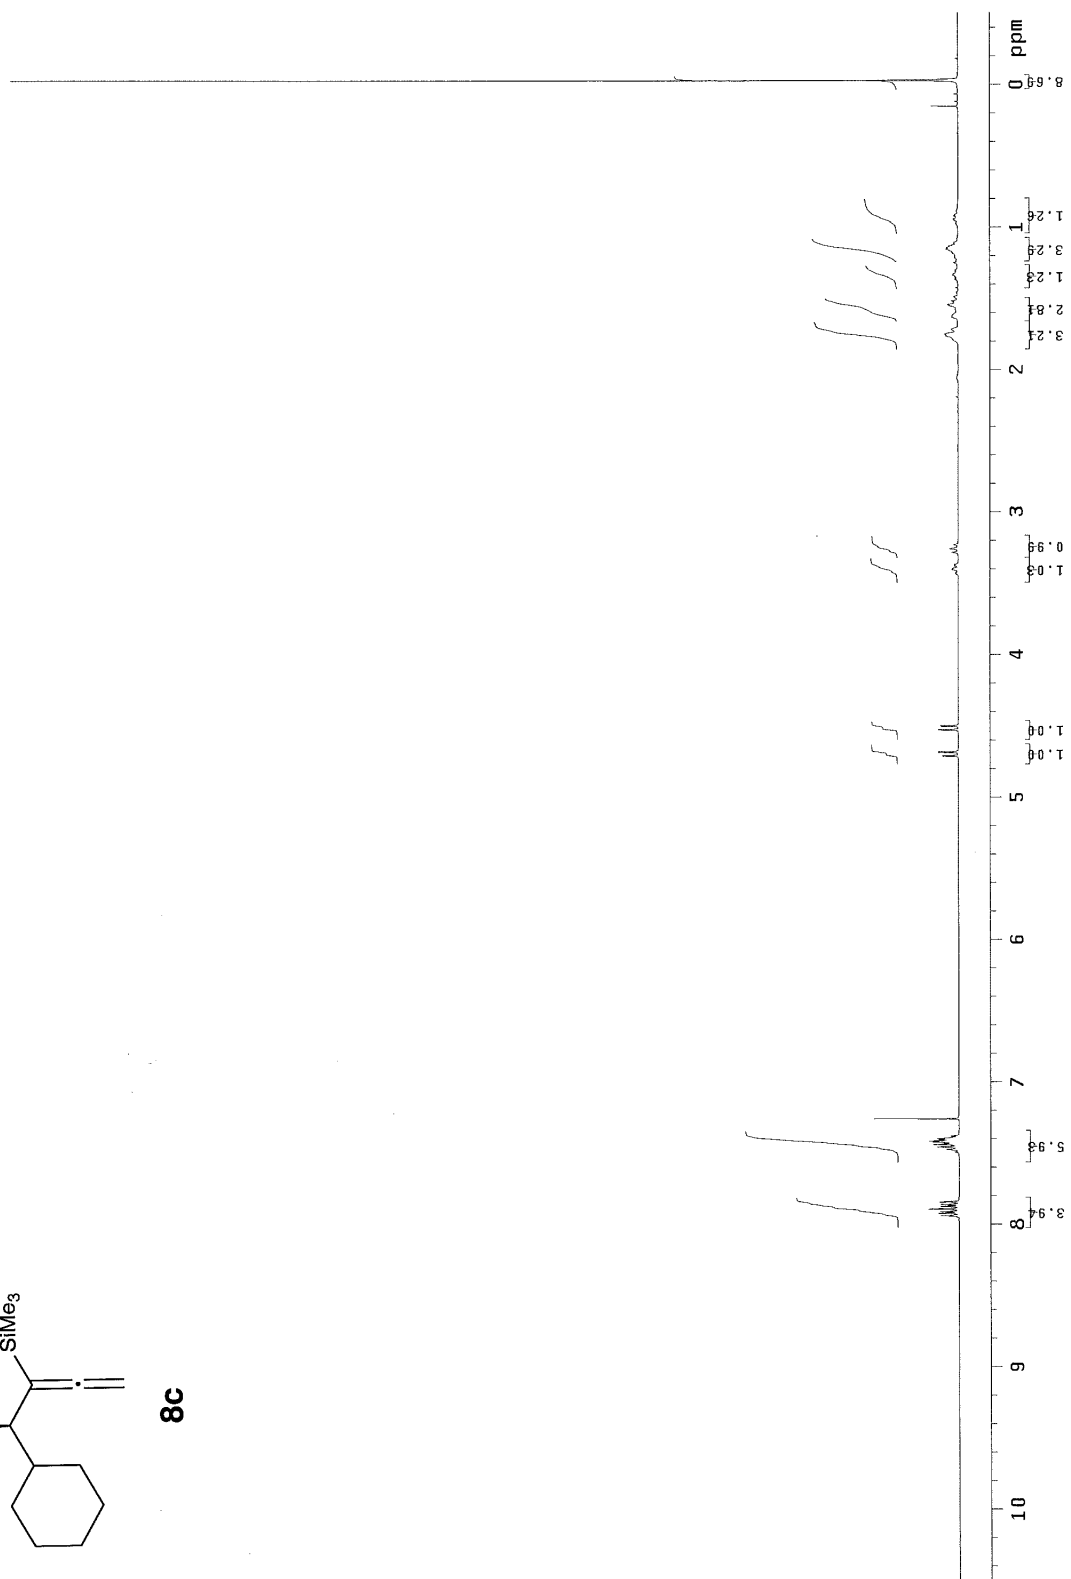

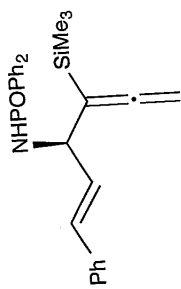

**9a**

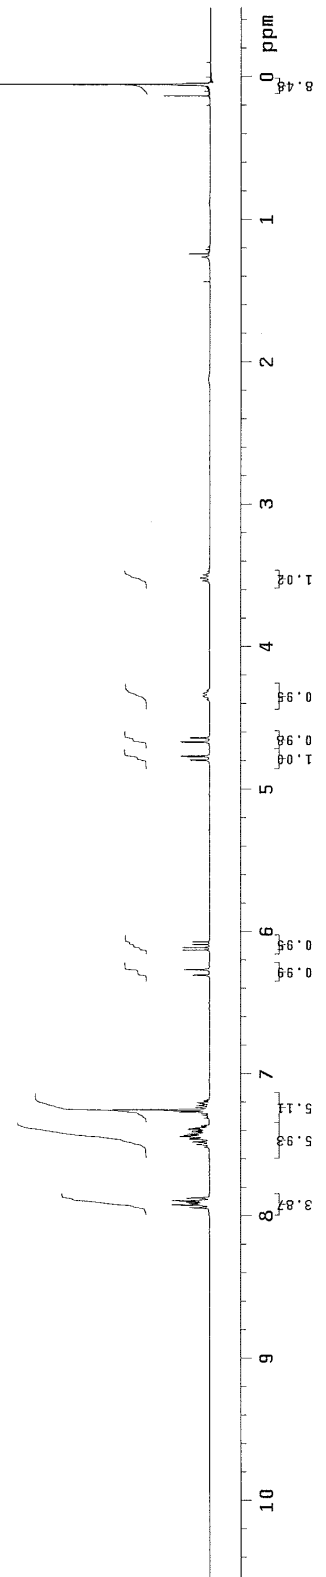

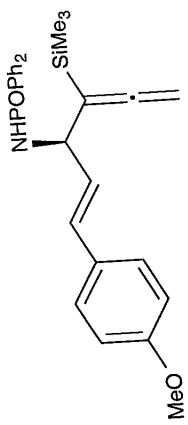

**9b**

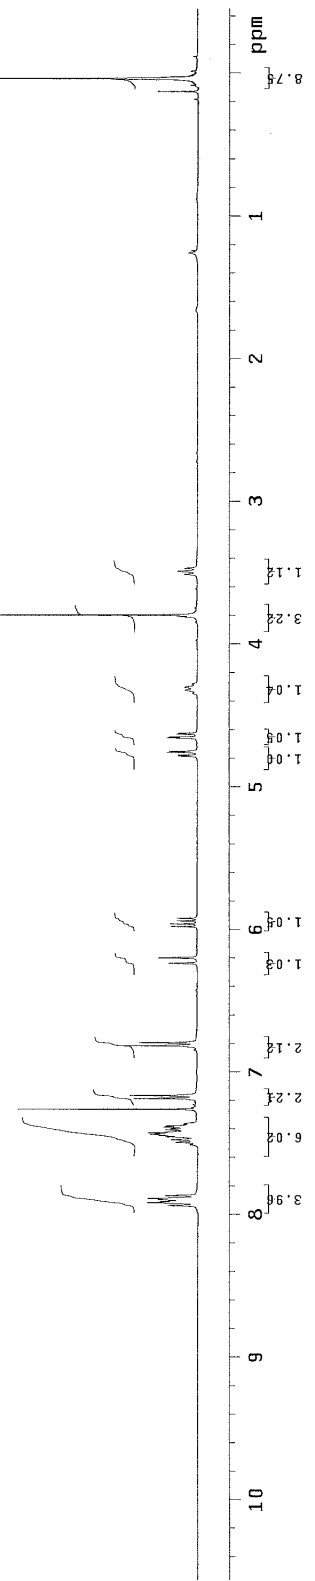

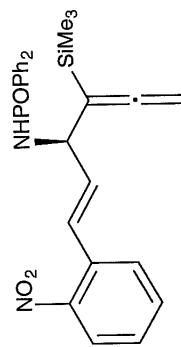

9c

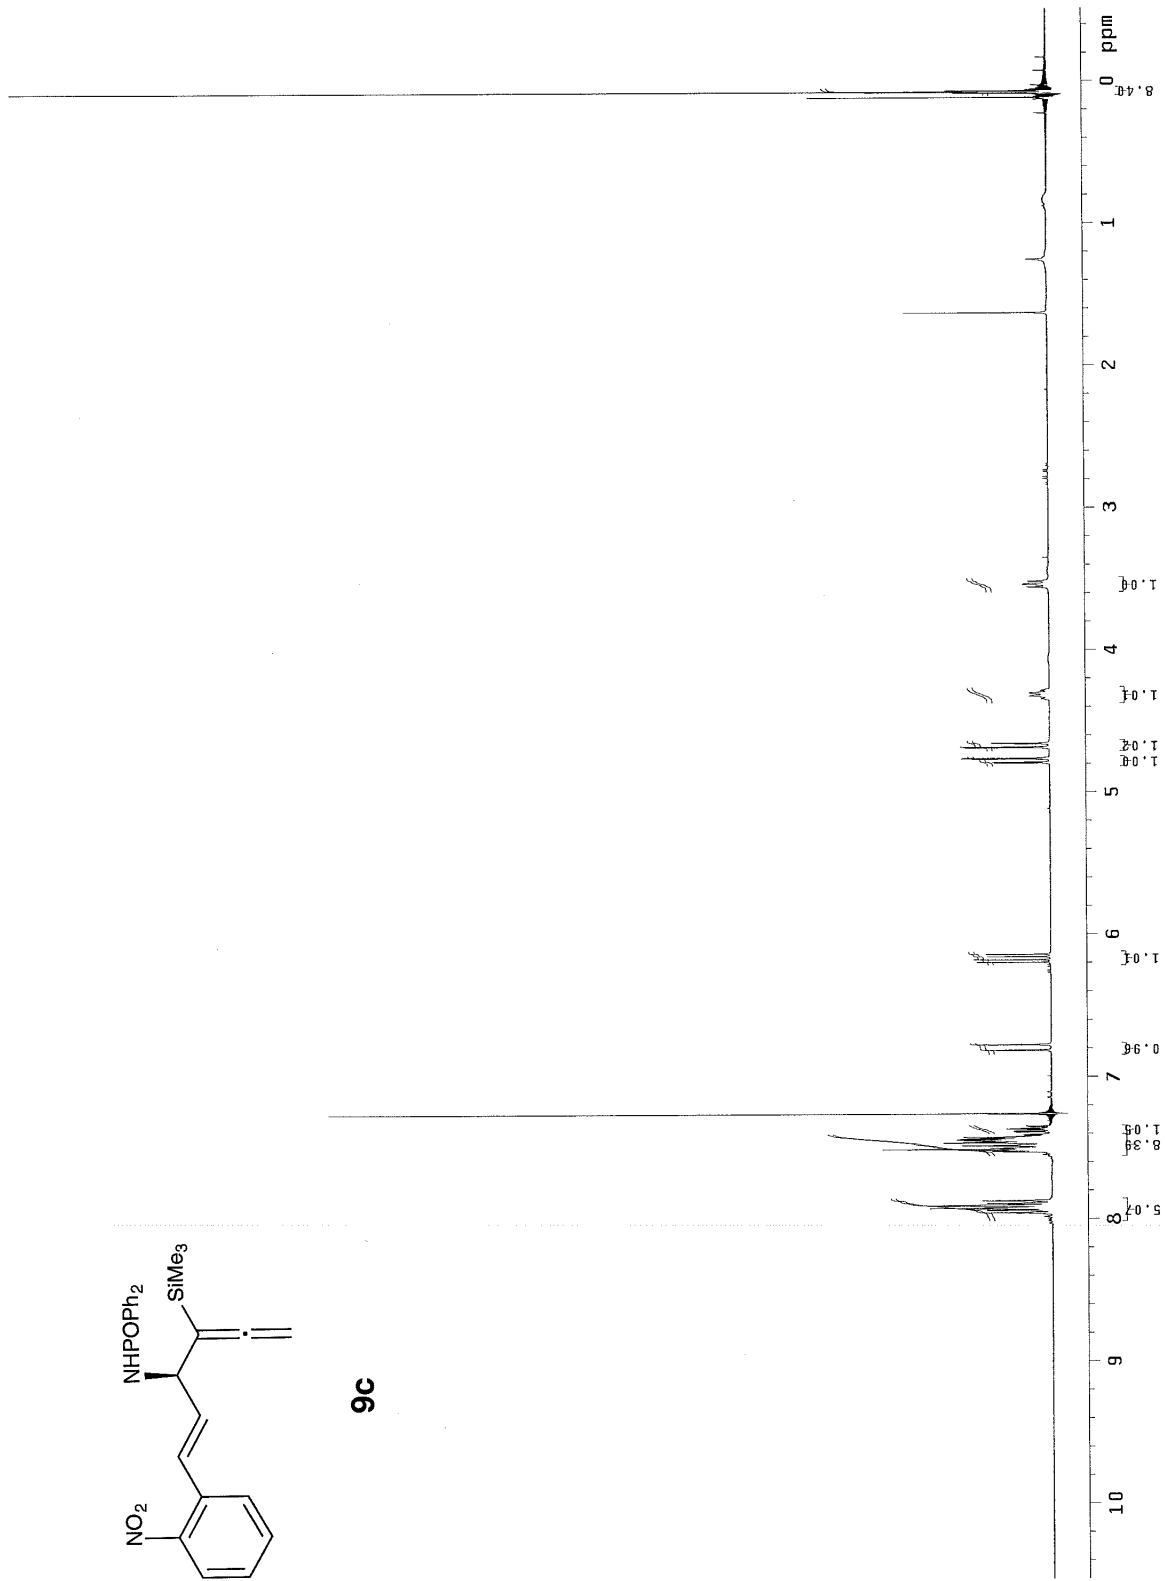

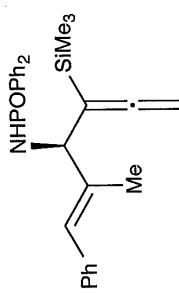

10

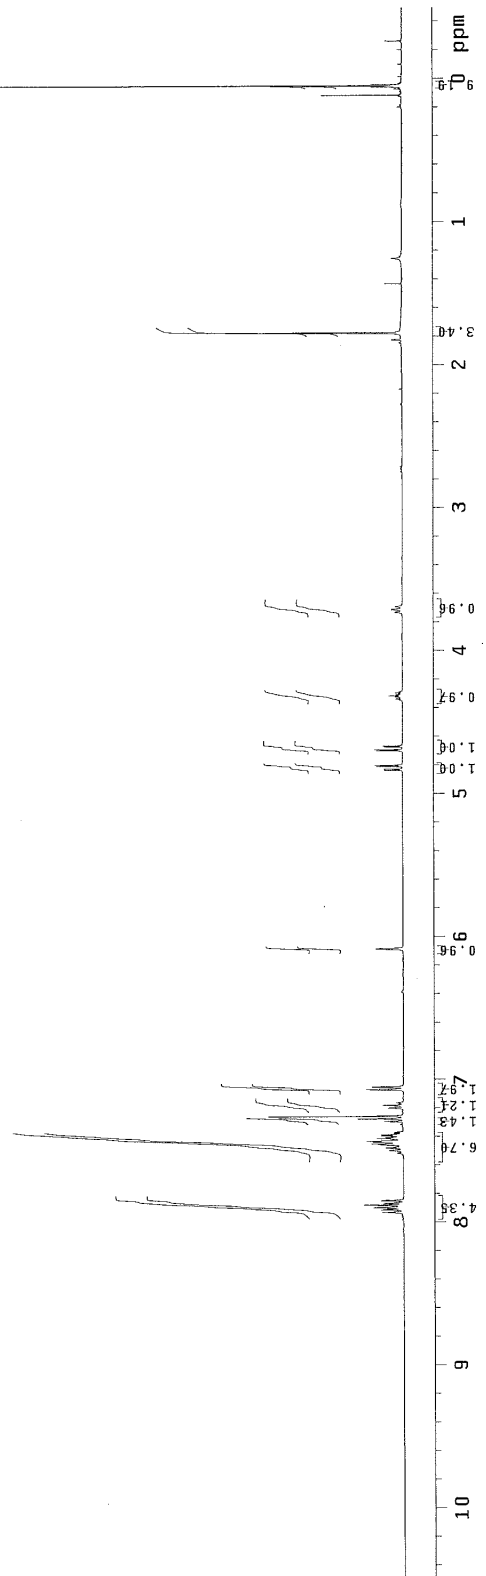

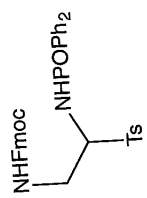

11

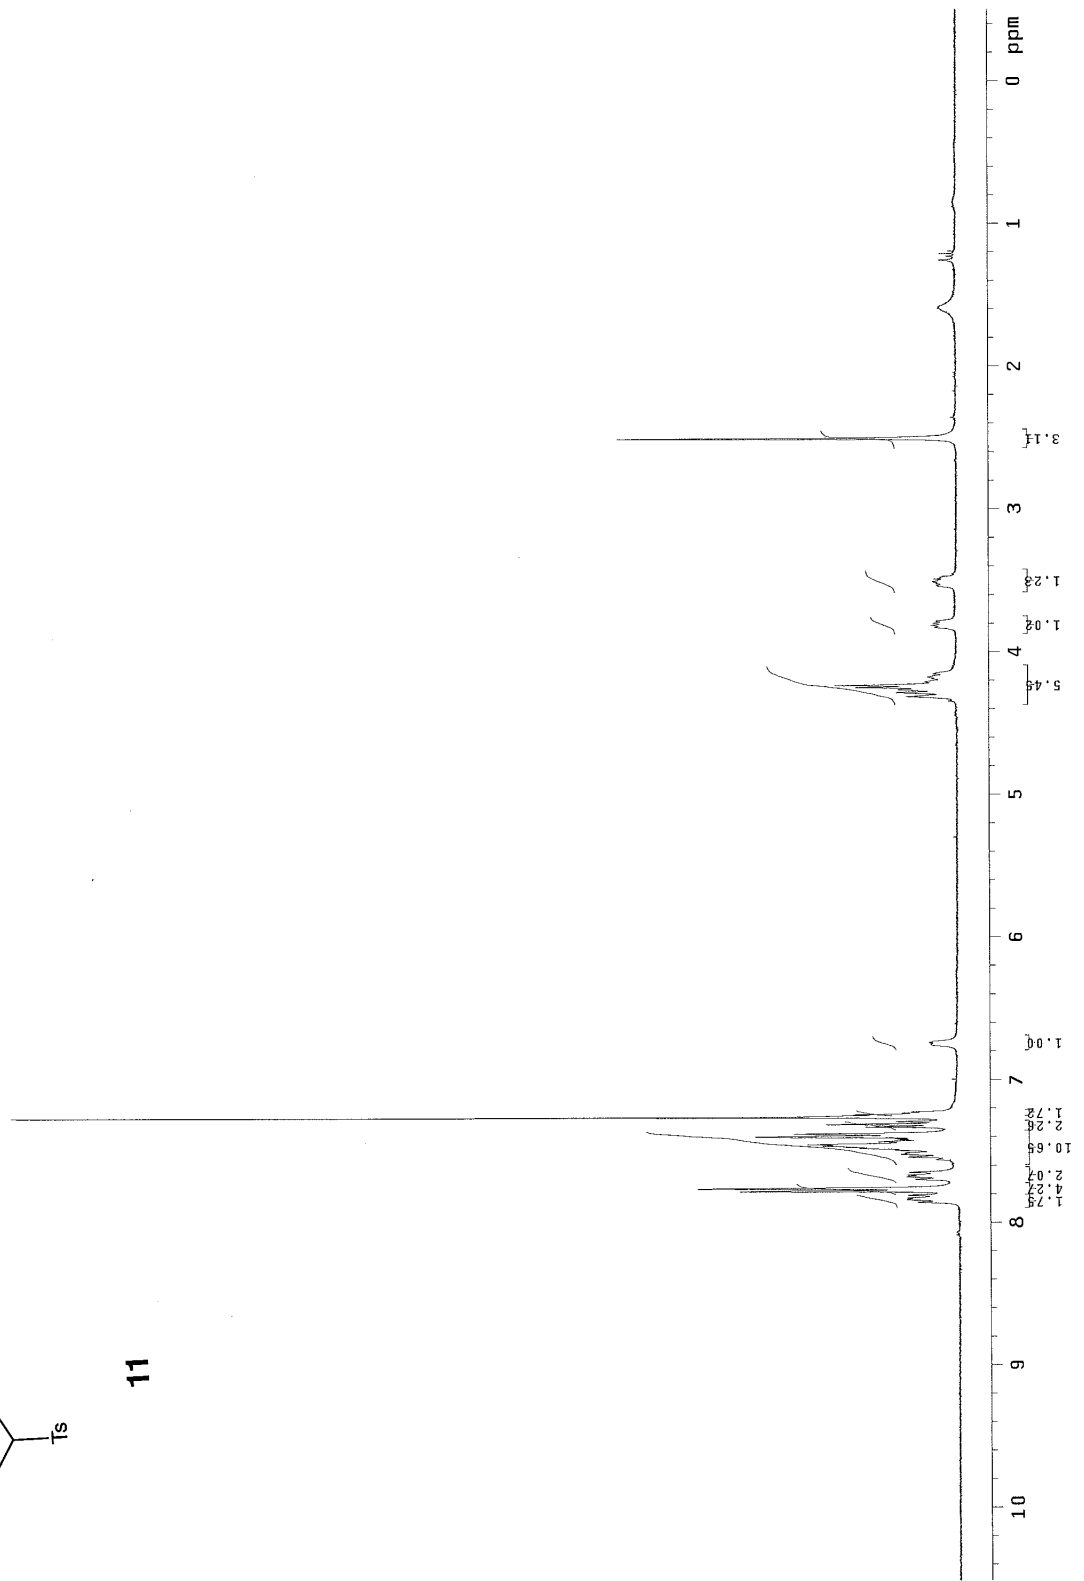



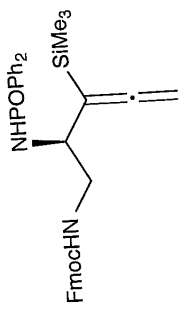

12

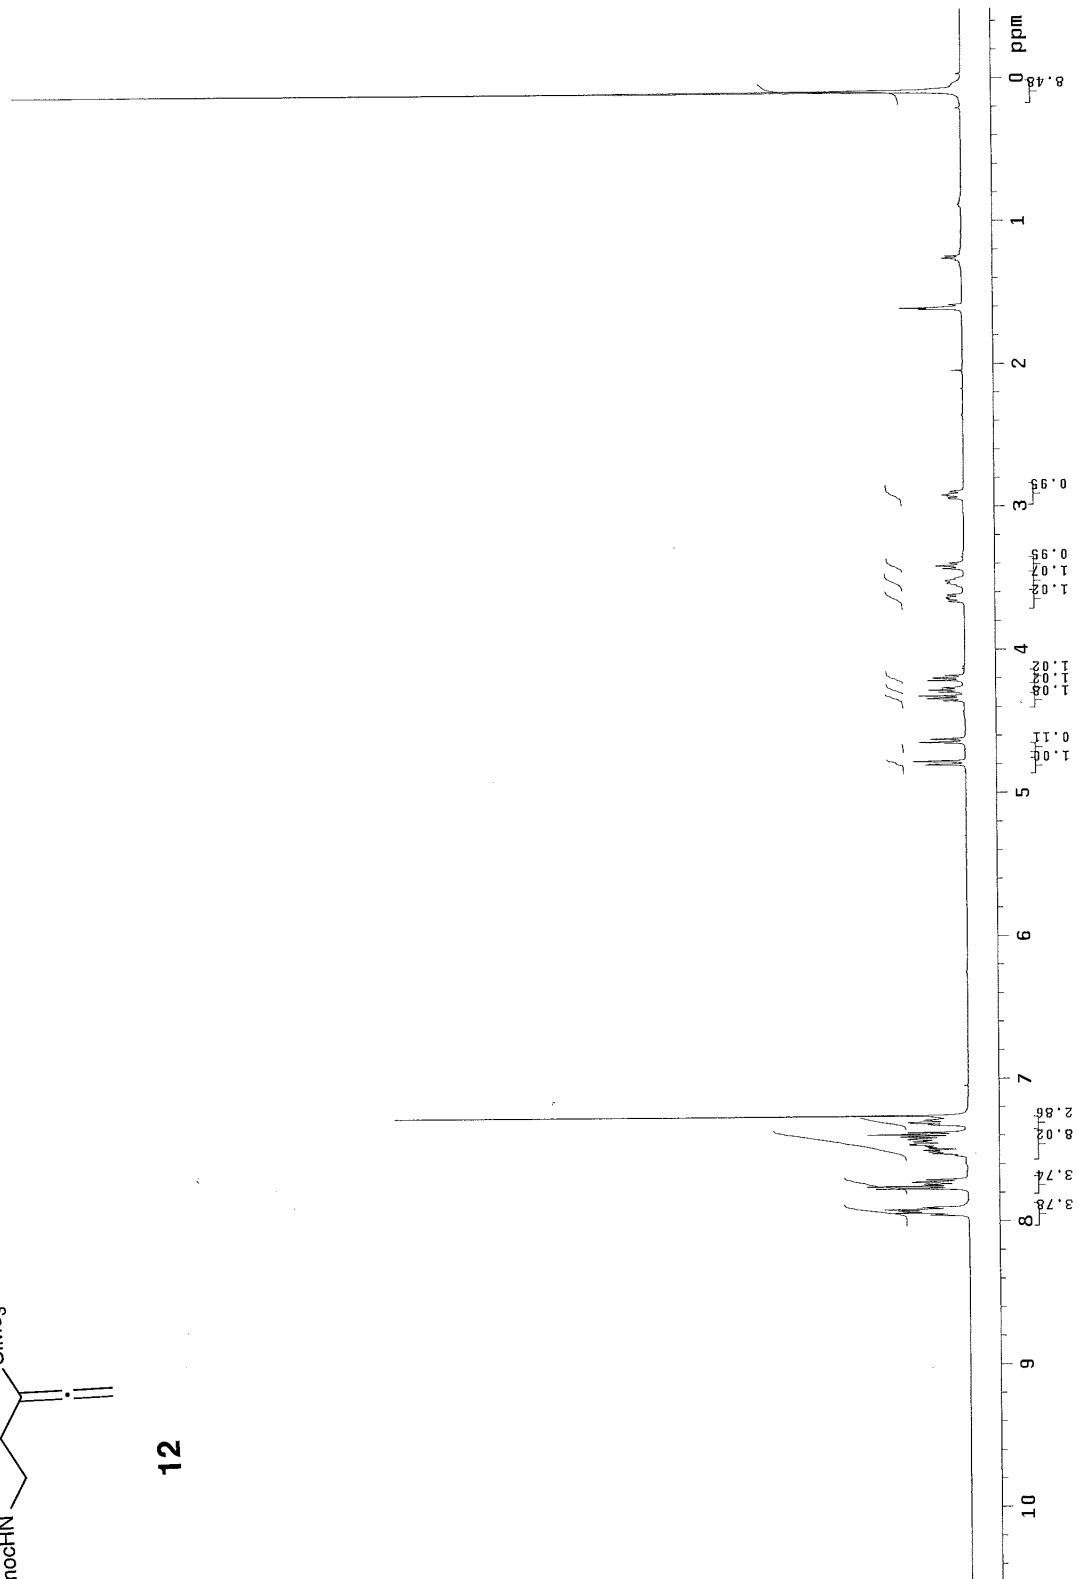

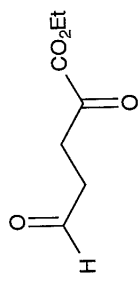

13

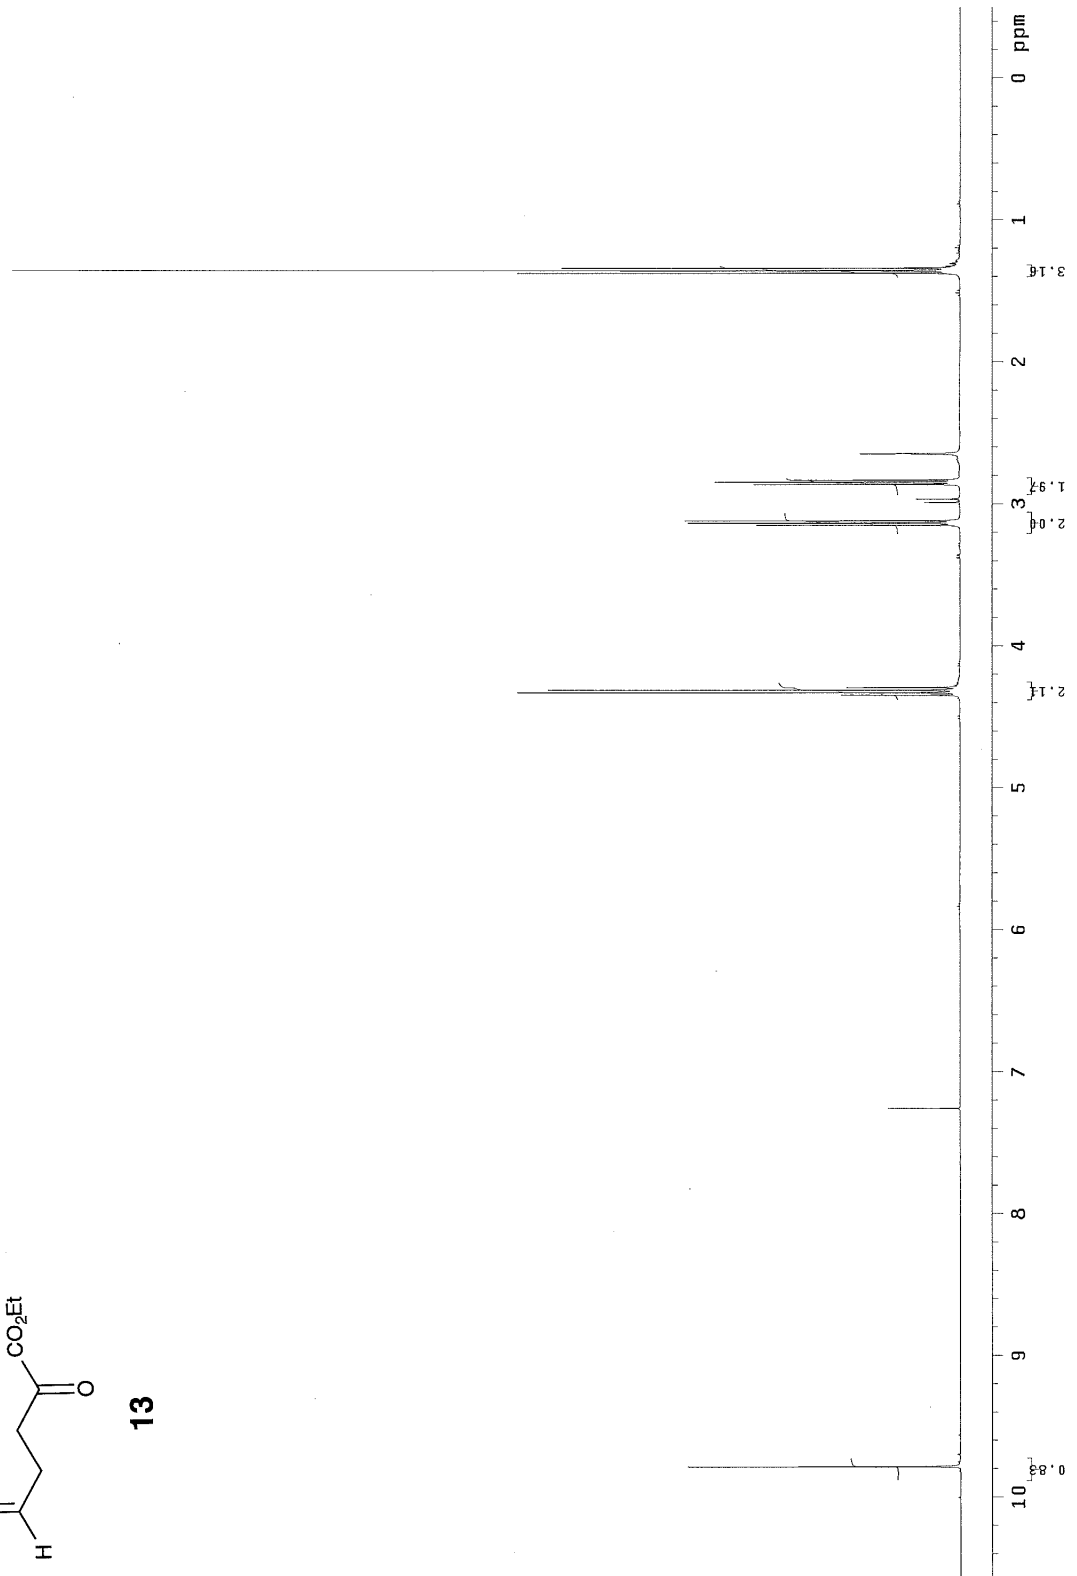

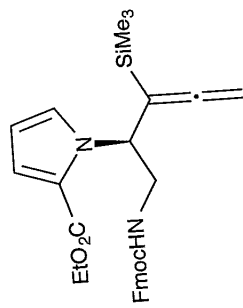

14

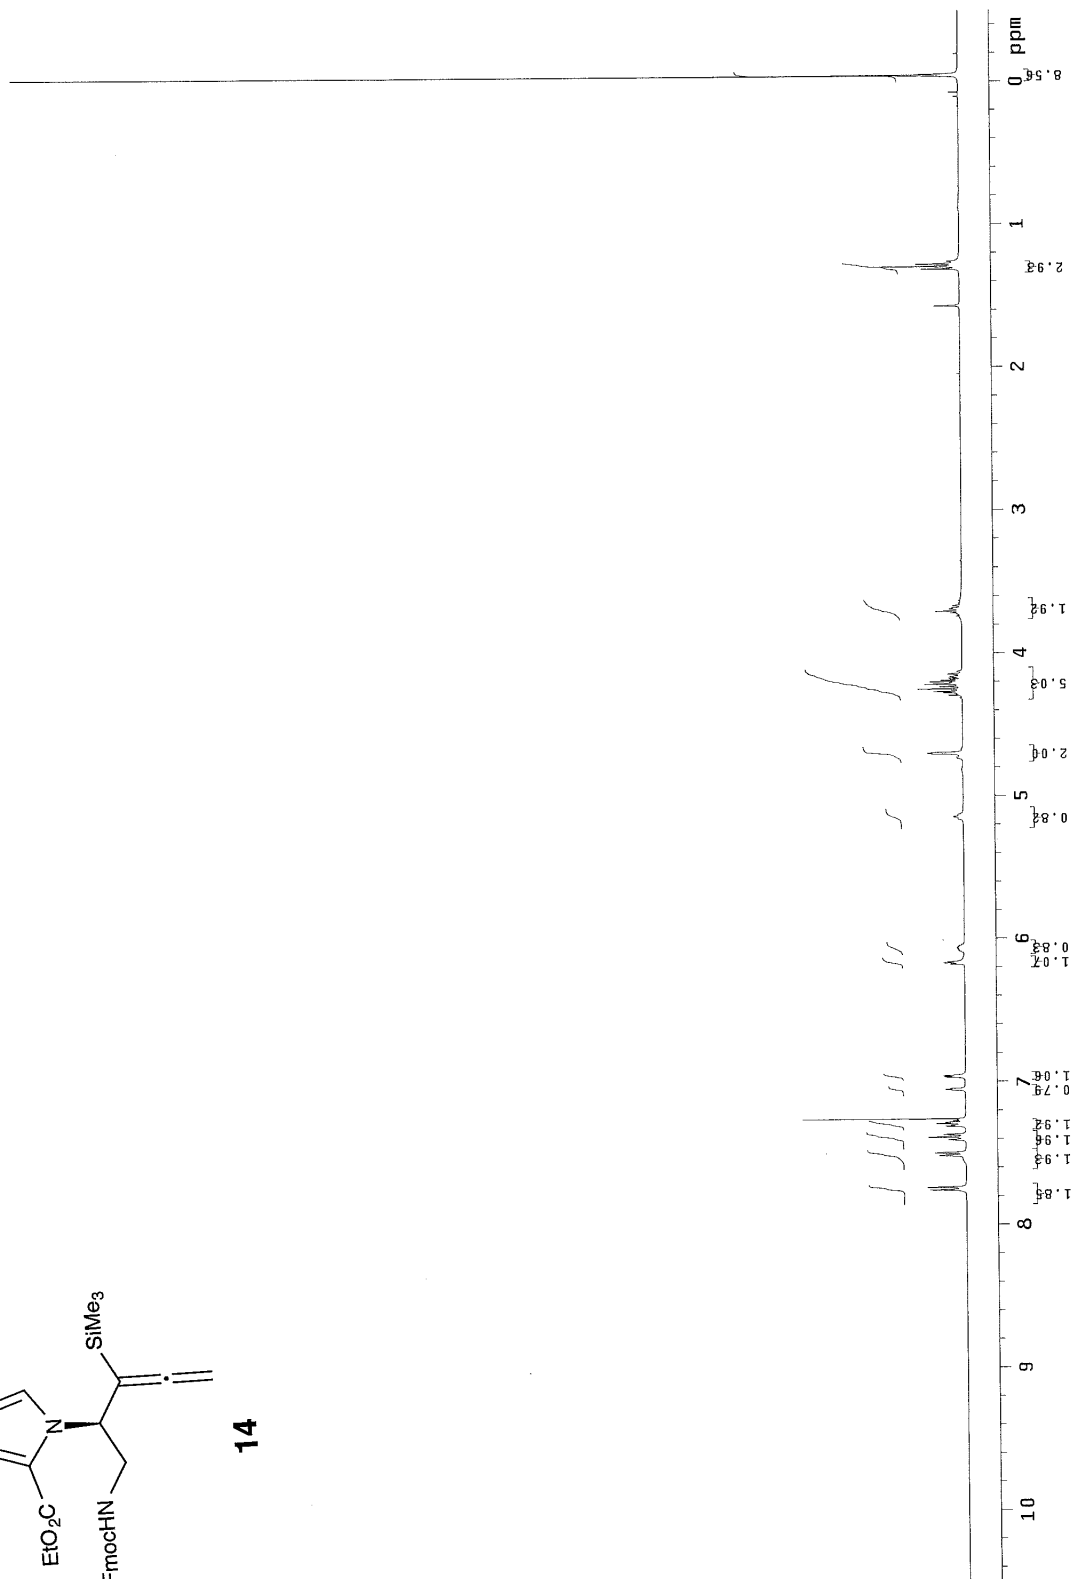

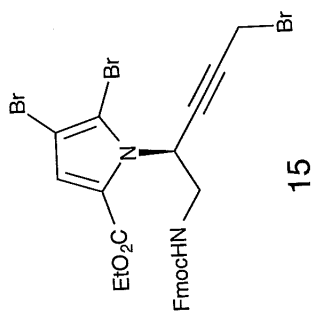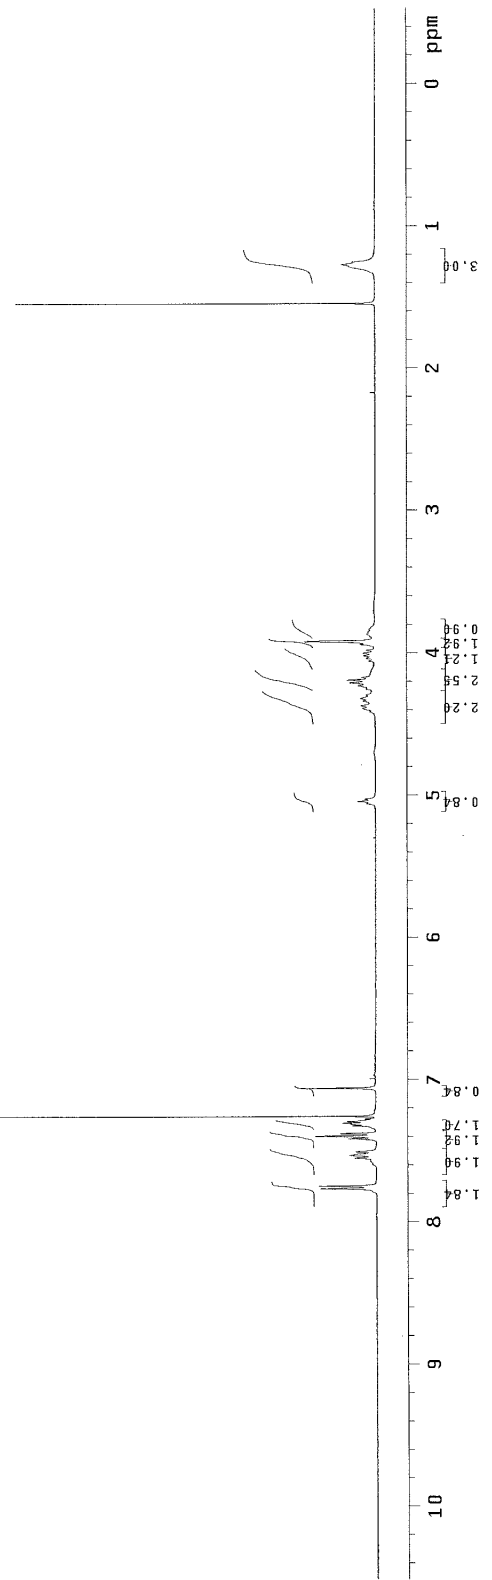

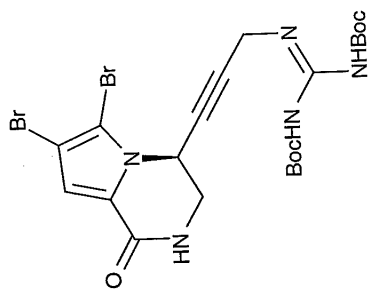

17

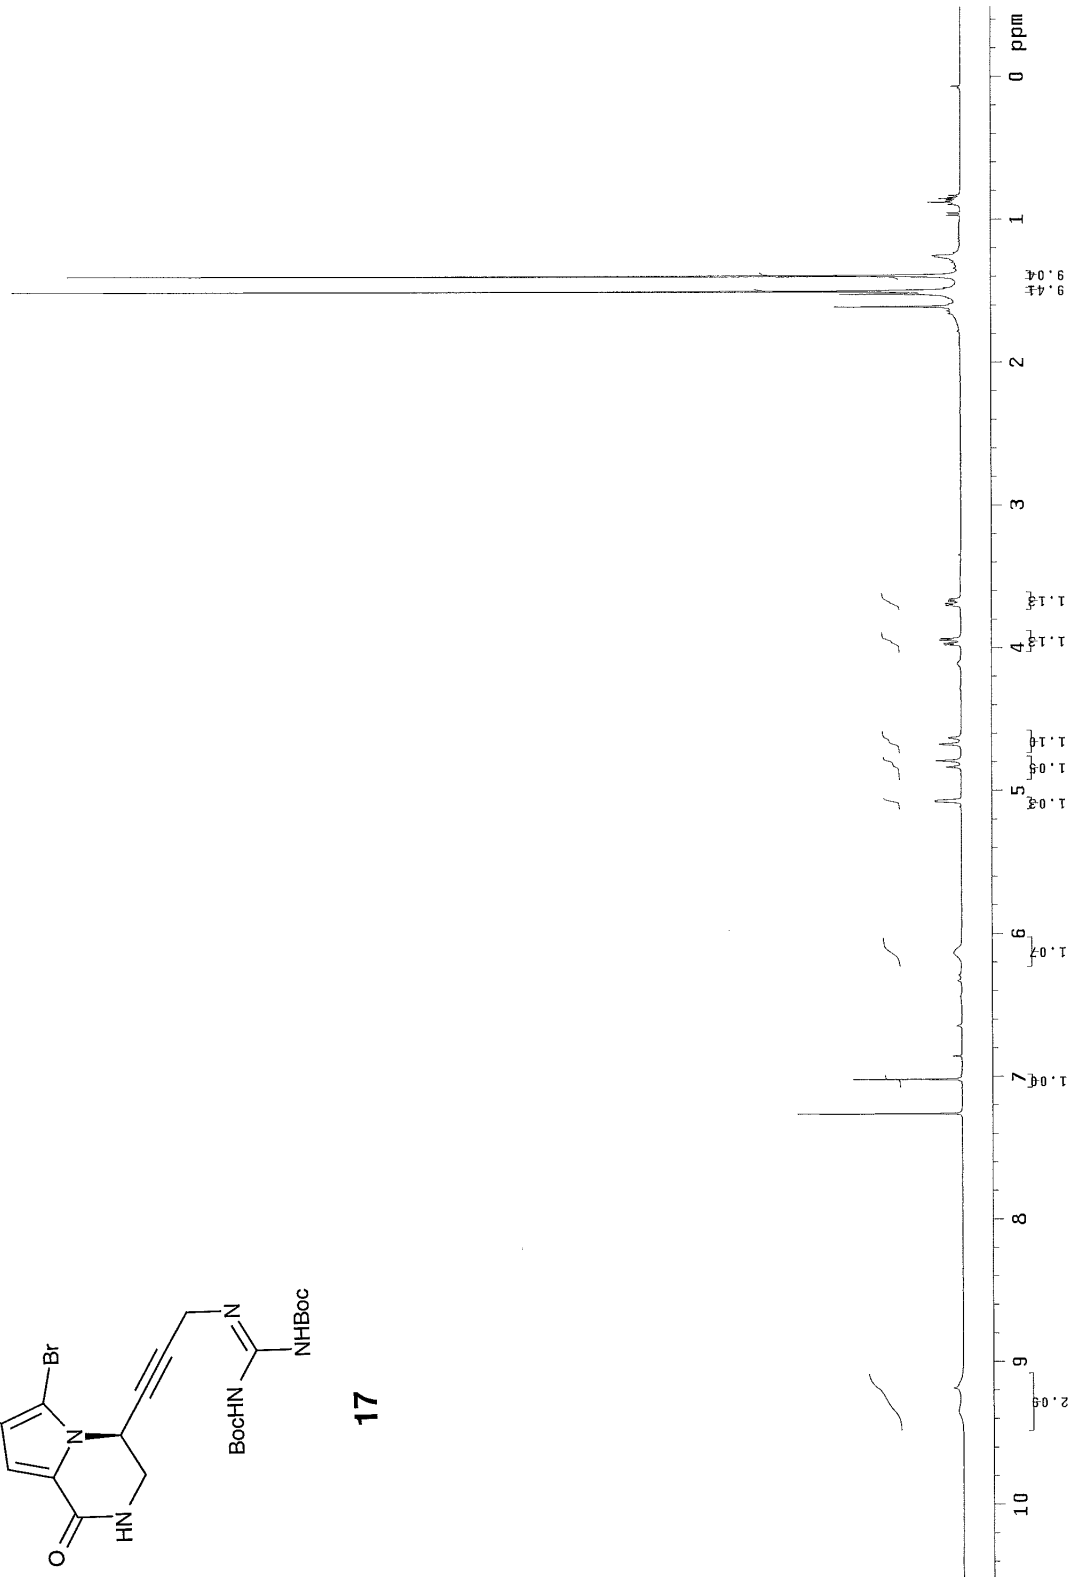

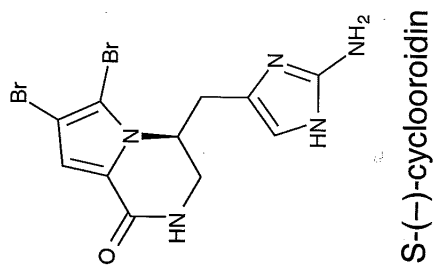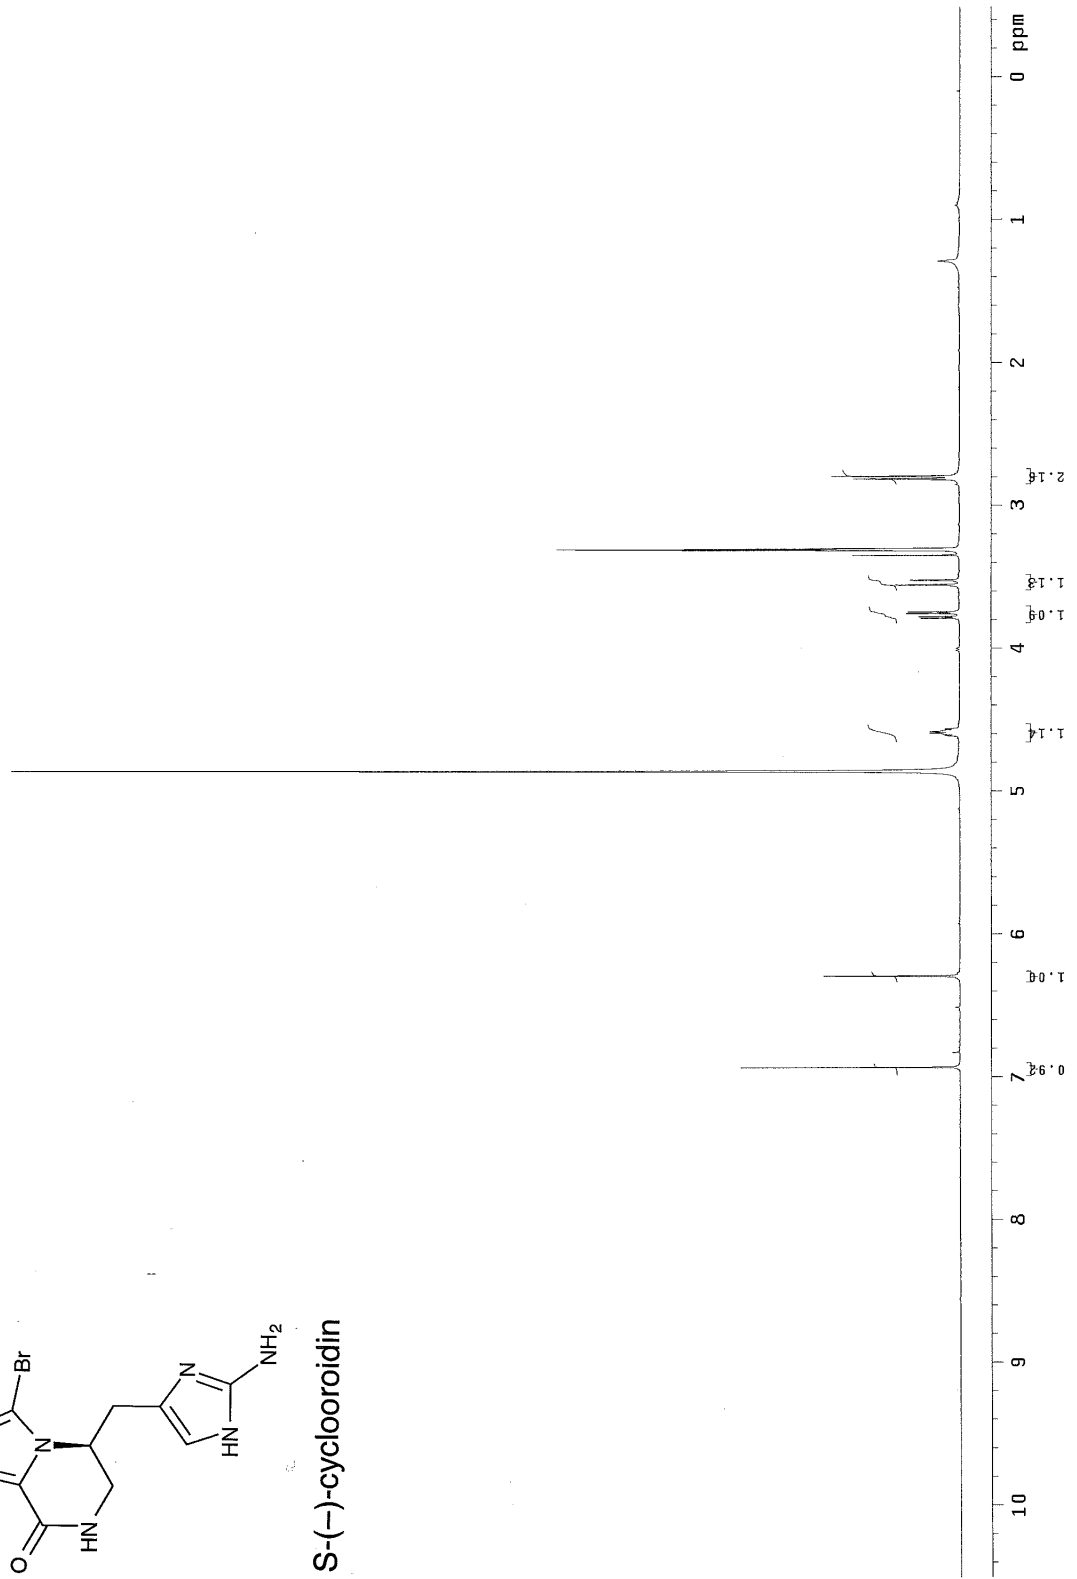

---

## References

- (i) (a) Jennings, W. B.; Lovely, C. J. *Tetrahedron*. **1991**, *47*, 5561–5568. (b) Yamada, K-i.; Harwood, S. J.; Gröger, H.; Shibasaki, M. *Angew. Chem., Int. Ed.* **1999**, *38*, 3504–3506.
- (2) (a) Côté, A.; Boezio, A. A.; Charette, A. B. *Proc. Natl. Acad. Sci.* **2004**, *101*, 5405–5410. (b) Yamaguchi, A.; Matsunaga, S.; Shibasaki, M. *Tetrahedron Lett.* **2006**, *47*, 3985–3989.
- (3) Desrosiers, J.-N.; Côté, A.; Boezio, A. A.; Charette, A. B. *Org. Synth.* **2006**, *83*, 5–17.
- (iv) Vieira, E. M.; Snapper, M. L.; Hoveyda, A. H. *J. Am. Chem. Soc.* **2011**, *133*, 3332–3335.
- (v) Fandrick, D. R.; Saha, J.; Fandrick, K. R.; Sanyal, S.; Ogikubo, J.; Lee, H.; Roschangar, F.; Song, J. J.; Senanayake, C. H. *Org. Lett.* **2011**, *13*, 5616–5619.
- (vi) Fandrick, D. R.; Roschangar, F.; Kim, C.; Hahm, B. J.; Cha, M. H.; Kim, H. Y.; Yoo, G.; Kim, T.; Reeves, J. T.; Song, J. J.; Tan, Z.; Qu, B.; Haddad, N.; Shen, S.; Grinberg, N.; Lee, H.; Yee, N.; Senanayake, C. H. *Org. Process Res. Dev.* **2012**, *16*, 1131–1140.
- (vii) Macritche, J. A.; Silcock, A.; Willis, C. L. *Tetrahedron: Asymm.* **1997**, *8*, 3895–3902.
- (viii) (a) Mukherjee, S.; Sivappa, R.; Yousufuddin, M.; Lovely, C. J. *Org. Lett.* **2010**, *12*, 4940–4943. (b) Patel, J.; Pelloux–León, N.; Minassian, F.; Vallée, Y. *Tetrahedron Lett.* **2006**, *47*, 5561–5563. (c) Papeo, G.; Antonia, M.; Frau, G-Z.; Borghi, D.; Varasi, M. *Tetrahedron Lett.* **2005**, *46*, 8635–8638.
- (ix) Vieira, E. M.; Haeffner, F.; Snapper, M. L.; Hoveyda, A. H. *Angew. Chem., Int. Ed.* **2012**, *51*, 6618–6621.
- (x) Gaussian 09, Frisch, M. J.; Trucks, G. W.; Schlegel, H. B.; Scuseria, G. E.; Robb, M. A.; Cheeseman, J. R.; Scalmani, G.; Barone, V.; Mennucci, B.; Petersson, G. A.; Nakatsuji, H.; Caricato, M.; Li, X.; Hratchian, H. P.; Izmaylov, A. F.; Bloino, J.; Zheng, G.; Sonnenberg, J. L.; Hada, M.; Ehara, M.; Toyota, K.; Fukuda, R.; Hasegawa, J.; Ishida, M.; Nakajima, T.; Honda, Y.; Kitao, O.; Nakai, H.; Vreven, T.; Montgomery, J. A., Jr.; Peralta, J. E.; Ogliaro, F.; Bearpark, M.; Heyd, J. J.; Brothers, E.; Kudin, K. N.; Staroverov, V. N.; Kobayashi, R.; Normand, J.; Raghavachari, K.; Rendell, A.; Burant, J. C.; Iyengar, S. S.; Tomasi, J.; Cossi, M.; Rega, N.; Millam, N. J.; Klene, M.; Knox, J. E.; Cross, J. B.; Bakken, V.; Adamo, C.; Jaramillo, J.; Gomperts, R.; Stratmann, R. E.; Yazyev, O.; Austin, A. J.; Cammi, R.; Pomelli, C.; Ochterski, J. W.; Martin, R. L.; Morokuma, K.; Zakrzewski, V. G.; Voth, G. A.; Salvador, P.; Dannenberg, J. J.; Dapprich, S.; Daniels, A. D.; Farkas, Ö.; Foresman, J. B.; Ortiz, J. V.; Cioslowski, J.; Fox, D. J. *Gaussian, Inc., Wallingford CT*, 2009.
